# Supplementary material for: Methemoglobinemia, Increased Deformability and Reduced Membrane Stability of Red Blood Cells in a Cat with a CYB5R3 Splice Defect
Source: MDPI journal article supplement (doi:10.3390/cells12070991), 2023-03-24
Supplement: s1 [file s1]

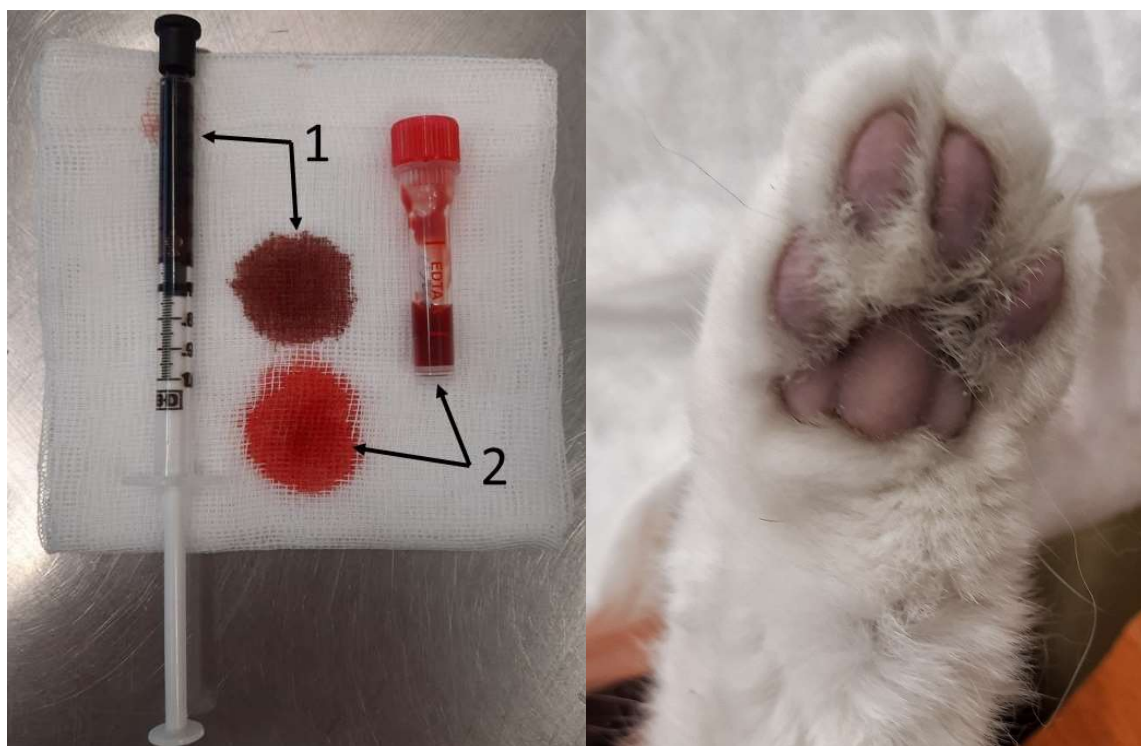

**Figure S1** Left panel: MetHb spot-test for methemoglobin for the affected cat (1) and an unaffected cat (2). The blood of the affected cat keeps the brown discoloration even after being exposed to air. Right panel: cyanosis in the affected cat.

|                          |                                                               |     |
|--------------------------|---------------------------------------------------------------|-----|
| XP_044918404.1_CYB5R3_wt | MGAQLSTLGHVVLSPVWFLYNLFMKLFHRSTPAITLESPIKYPLRLIDKEVINHDTRRF   | 60  |
| CYB5R3_mut#1             | MGAQLSTLGHVVLSPVWFLYNLFMKLFHRSTPAITLESPIKYPLRLIDKEVINHDTRRF   | 60  |
| CYB5R3_mut#2             | MGAQLSTLGHVVLSPVWFLYNLFMKLFHRSTPAITLESPIKYPLRLIDKEASTTSRLE    | 60  |
| XP_044918404.1_CYB5R3_wt | RFALPSPQHILGLPVG-----QHIYLSARIDGNLVIRPYTPVSSDDDKGFVDL         | 108 |
| CYB5R3_mut#1             | RFALPSPQHILGLPVGERSPDPPARVEPGQHIYLSARIDGNLVIRPYTPVSSDDDKGFVDL | 120 |
| CYB5R3_mut#2             | SMETWSSGPTLPSPAMTTTRVLWTWSSRFTSKTPIPSFLLGARCPSWKA-----        | 109 |
| XP_044918404.1_CYB5R3_wt | VIKVFYKDTHPKFPAGGKMSQYLESMKIGDTIEFRGPNGLLVYQGKGKFAIRPDKKSNPV  | 168 |
| CYB5R3_mut#1             | VIKVFYKDTHPKFPAGGKMSQYLESMKIGDTIEFRGPNGLLVYQGKGKFAIRPDKKSNPV  | 180 |
| CYB5R3_mut#2             | -----                                                         | 109 |
| XP_044918404.1_CYB5R3_wt | IKTAKSVGMIAGGTGITPMLQVIRAIMKDPDDHTVCHLLFANQTEKDILLRPELEELRNE  | 228 |
| CYB5R3_mut#1             | IKTAKSVGMIAGGTGITPMLQVIRAIMKDPDDHTVCHLLFANQTEKDILLRPELEELRNE  | 240 |
| CYB5R3_mut#2             | -----                                                         | 109 |
| XP_044918404.1_CYB5R3_wt | HSARFKLWYTVDKAPEAWDYSQGFVNEEMIRDHLPPPEEEPLILMCGPPPMIYACLPLN   | 288 |
| CYB5R3_mut#1             | HSARFKLWYTVDKAPEAWDYSQGFVNEEMIRDHLPPPEEEPLILMCGPPPMIYACLPLN   | 300 |
| CYB5R3_mut#2             | -----                                                         | 109 |
| XP_044918404.1_CYB5R3_wt | DRVGHPKERCFTF                                                 | 301 |
| CYB5R3_mut#1             | DRVGHPKERCFTF                                                 | 313 |
| CYB5R3_mut#2             | -----                                                         | 109 |

**Figure S2** Amino acid alignment of the CYB5R3 wildtype protein (XP\_044918404.1) and the two predicted mutant proteins, mut#1, XP\_044918404.1:p.(G76\_Q77insERSPDPPARVEPG) and mut#2, XP\_044918404.1:p.(V52Afs\*58). The insertion of 12 additional amino acids in mut#1 is shown in blue. In mut#2, 58 amino acids that are altered by the frameshift are marked in red.

8  
9  
10  
11  
12
