# Supplementary material for: Methemoglobinemia, Increased Deformability and Reduced Membrane Stability of Red Blood Cells in a Cat with a CYB5R3 Splice Defect
Source: Cells. 2023 Mar 24;12(7):991. doi: 10.3390/cells12070991 (PMC10093206; doi:10.3390/cells12070991)
Supplement: Supplementary file 1 [file cells-12-00991-s001.zip › Table_S1_Public_Genomes.xlsx]

## Sheet: Sheet1
Table S1. Accession numbers of 75 cat genome sequences. The affected cat is highlighted in yellow. The other 74 genome sequences were used as controls in variant filtering.
Sample ID	Breed	Study Accession	Sample Accession	Remark
K350	Norwegian Forest Cat	PRJEB7401	SAMEA5885912
K443	Maine Coon	PRJEB7401	SAMEA1061682
K450	Domestic shorthair (not purebred)	PRJEB7401	SAMEA2785958
K452	Bengal	PRJEB7401	SAMEA1061681
K469	Egyptian Mau	PRJEB7401	SAMEA1061683
K471	Domestic shorthair (not purebred, fom USA)	PRJEB7401	SAMEA1061684
K472	Domestic shorthair (not purebred, fom USA)	PRJEB7401	SAMEA1061685
K473	Domestic shorthair (not purebred, fom USA)	PRJEB7401	SAMEA1061686
K484	Bengal	PRJEB7401	SAMEA5885917
K485	Bengal	PRJEB7401	SAMEA5885918
K486	Bengal	PRJEB7401	SAMEA5885919
K488	Toyger	PRJEB7401	SAMEA5885925
K494	Maine Coon	PRJEB7401	SAMEA5885913
K499	unknown	PRJEB7401	SAMEA1061687
K500	Burmese	PRJEB7401	SAMEA5885920
K502	British Shorthair	PRJEB7401	SAMEA1061688
K509	Bengal	PRJEB7401	SAMEA5885921
K510	Domestic shorthair (not purebred)	PRJEB7401	SAMEA104694019
K511	Domestic shorthair (not purebred)	PRJEB7401	SAMEA1061799
K513	British Shorthair	PRJEB7401	SAMEA5885914
K514	British Shorthair	PRJEB7401	SAMEA5885915
K515	Persian	PRJEB7401	SAMEA1061689
K516	Maine Coon	PRJEB7401	SAMEA5885928
K517	British Shorthair	PRJEB7401	SAMEA5885916
K518	Domestic shorthair (not purebred)	PRJEB7401	SAMEA5885922
K519	Maine Coon	PRJEB7401	SAMEA5885923
K520	Bengal	PRJEB7401	SAMEA5885926
K528	Persian	PRJEB7401	SAMEA5885983
K529	Persian	PRJEB7401	SAMEA5885984
K530	Persian	PRJEB7401	SAMEA5885985
K531	Persian	PRJEB7401	SAMEA5885986
K532	Domestic shorthair (not purebred)	PRJEB7401	SAMEA5885924
K533	Not purebred (Bombay ?)	PRJEB7401	SAMEA5885927
K544	Domestic long hair (not purebred)	PRJEB7401	SAMEA5885929
K548	Domestic shorthair (not purebred)	PRJEB7401	SAMEA5885930
K549	Domestic shorthair (not purebred)	PRJEB7401	SAMEA5905717
K553	Domestic shorthair (not purebred)	PRJEB7401	SAMEA7853381
K556	Domestic shorthair (not purebred)	PRJEB7401	SAMEA7853382
K563	Domestic shorthair (not purebred)	PRJEB7401	SAMEA6085996
K564	Domestic shorthair (not purebred)	PRJEB7401	SAMEA7853383
K566	Maine Coon	PRJEB7401	SAMEA7376281
K570	Domestic shorthair (not purebred)	PRJEB7401	SAMEA7376282
K573	Domestic long hair (not purebred)	PRJEB7401	SAMEA7376283
K578	Domestic long hair (not purebred)	PRJEB7401	SAMEA7376284
K580	Domestic shorthair (not purebred)	PRJEB7401	SAMEA7376285
K581	Domestic shorthair (not purebred)	PRJEB7401	SAMEA7376286
K583	Domestic shorthair (not purebred)	PRJEB7401	SAMEA7853384
K584	Domestic shorthair (not purebred)	PRJEB7401	SAMEA7853385
S19190_Tessa	Burmese	PRJNA288177	SAMN05980350
S19194_Pudge	Burmese	PRJNA343392	SAMN05980373
S19197_Kooki	Burmese	PRJNA343392	SAMN05980372
K591	Turkish Van	PRJEB7401	SAMEA8609184
K596	British Shorthair	PRJEB7401	SAMEA8609185
K600	Maine Coon	PRJEB7401	SAMEA8609188
K602	Domestic shorthair (not purebred)	PRJEB7401	SAMEA8609186
K610	Siberian	PRJEB7401	SAMEA8952638
K560	Domestic shorthair (not purebred)	PRJEB7401	SAMEA8952636
K620	Ragdoll	PRJEB7401	SAMEA8952639
K626	Domestic shorthair (not purebred)	PRJEB7401	SAMEA8952640
K627	Domestic shorthair (not purebred)	PRJEB7401	SAMEA8952641
K629	Domestic shorthair (not purebred)	PRJEB7401	SAMEA8952642
K601	Maine Coon	PRJEB7401	SAMEA8952637
K646	Maine Coon	PRJEB7401	SAMEA8952643
K557	Peterbald	PRJEB7401	SAMEA13314551
K650	Maine Coon	PRJEB7401	SAMEA13314552
K654	Domestic shorthair (not purebred)	PRJEB7401	SAMEA13314553
K708	Oriental shorthair	PRJEB7401	SAMEA13314554
K468	Egyptian Mau	PRJEB7401	SAMEA14502946
K522	Bengal	PRJEB7401	SAMEA14502947
K649	Maine Coon	PRJEB7401	SAMEA14502948
K709	Bengal	PRJEB7401	SAMEA14502949
K711	Domestic shorthair (not purebred)	PRJEB7401	SAMEA14502950	Cat affected by hereditary methemoglobinemia
K714	Maine Coon	PRJEB7401	SAMEA14502951
K718	Bengal	PRJEB7401	SAMEA14502952
K719	British Shorthair	PRJEB7401	SAMEA14502953
