# Supplementary material for: Methemoglobinemia, Increased Deformability and Reduced Membrane Stability of Red Blood Cells in a Cat with a CYB5R3 Splice Defect
Source: Cells. 2023 Mar 24;12(7):991. doi: 10.3390/cells12070991 (PMC10093206; doi:10.3390/cells12070991)
Supplement: Supplementary file 1 [file cells-12-00991-s001.zip › Table_S2_private_variants.xlsx]

## Sheet: private_variants_homozygous
Table S2. Private variants in the sequenced cat affected with hereditary methemoglobinemia. Private variants were obtained by filtering all variants that were present at least once in the 74 control genomes. This resulted in 23,992 homozygous private variants for the affected cat. Please note that variants are listed multiple times, if they have predicted effects on more than one transcript. The …
#CHROM	POS	REF	ALT	FILTER	EFFECT	IMPACT	GENE	GENEID	FEATURE	FEATUREID	BIOTYPE	RANK	HGVS_C	HGVS_P
chrA1	2728530	G	A	PASS	intergenic_region	MODIFIER	LOC123382191-LOC111556740	LOC123382191-LOC111556740	intergenic_region	LOC123382191-LOC111556740		-1	n.2728530G>A
chrA1	2738907	A	T	PASS	intergenic_region	MODIFIER	LOC123382191-LOC111556740	LOC123382191-LOC111556740	intergenic_region	LOC123382191-LOC111556740		-1	n.2738907A>T
chrA1	2740255	C	A	PASS	intergenic_region	MODIFIER	LOC123382191-LOC111556740	LOC123382191-LOC111556740	intergenic_region	LOC123382191-LOC111556740		-1	n.2740255C>A
chrA1	2742878	T	C	PASS	intergenic_region	MODIFIER	LOC123382191-LOC111556740	LOC123382191-LOC111556740	intergenic_region	LOC123382191-LOC111556740		-1	n.2742878T>C
chrA1	2742983	A	G	PASS	intergenic_region	MODIFIER	LOC123382191-LOC111556740	LOC123382191-LOC111556740	intergenic_region	LOC123382191-LOC111556740		-1	n.2742983A>G
chrA1	2743302	T	C	PASS	intergenic_region	MODIFIER	LOC123382191-LOC111556740	LOC123382191-LOC111556740	intergenic_region	LOC123382191-LOC111556740		-1	n.2743302T>C
chrA1	2743462	G	A	PASS	intergenic_region	MODIFIER	LOC123382191-LOC111556740	LOC123382191-LOC111556740	intergenic_region	LOC123382191-LOC111556740		-1	n.2743462G>A
chrA1	2744827	G	A	PASS	intergenic_region	MODIFIER	LOC123382191-LOC111556740	LOC123382191-LOC111556740	intergenic_region	LOC123382191-LOC111556740		-1	n.2744827G>A
chrA1	2745811	C	T	PASS	intergenic_region	MODIFIER	LOC123382191-LOC111556740	LOC123382191-LOC111556740	intergenic_region	LOC123382191-LOC111556740		-1	n.2745811C>T
chrA1	5106862	C	T	PASS	intron_variant	MODIFIER	NUP58	NUP58	transcript	XM_023250027.2	protein_coding	5	c.649+305C>T
chrA1	5139556	A	G	PASS	intron_variant	MODIFIER	NUP58	NUP58	transcript	XM_023250028.2	protein_coding	14	c.1592-2594A>G
chrA1	5279574	T	TATCTCTCTCTCTCTCTCTCTCTCTCTCTCTCTCTCTCTCTCTCTCTCTCTCGCTGCCCCTCCTCCGTTCC	PASS	intron_variant	MODIFIER	ATP8A2	ATP8A2	transcript	XM_045043082.1	protein_coding	2	c.233+19847_233+19848insATCTCTCTCTCTCTCTCTCTCTCTCTCTCTCTCTCTCTCTCTCTCTCTCTCGCTGCCCCTCCTCCGTTCC
chrA1	5307207	AG	A	PASS	intron_variant	MODIFIER	ATP8A2	ATP8A2	transcript	XM_045043082.1	protein_coding	2	c.234-2826delG
chrA1	5316829	G	A	PASS	intron_variant	MODIFIER	ATP8A2	ATP8A2	transcript	XM_045043082.1	protein_coding	6	c.520-642G>A
chrA1	6297785	G	A	PASS	intergenic_region	MODIFIER	LOC123381975-WASF3	LOC123381975-WASF3	intergenic_region	LOC123381975-WASF3		-1	n.6297785G>A
chrA1	6298109	C	T	PASS	intergenic_region	MODIFIER	LOC123381975-WASF3	LOC123381975-WASF3	intergenic_region	LOC123381975-WASF3		-1	n.6298109C>T
chrA1	6303096	C	T	PASS	intergenic_region	MODIFIER	LOC123381975-WASF3	LOC123381975-WASF3	intergenic_region	LOC123381975-WASF3		-1	n.6303096C>T
chrA1	6304346	ATGTATATGTG	A	PASS	intergenic_region	MODIFIER	LOC123381975-WASF3	LOC123381975-WASF3	intergenic_region	LOC123381975-WASF3		-1	n.6304347_6304356delTGTATATGTG
chrA1	6922346	GGGGGGAGGGGAAAGTAGT	G	PASS	upstream_gene_variant	MODIFIER	LOC111559476	LOC111559476	transcript	XM_045045416.1	protein_coding	-1	c.-1794_-1777delGGGGGAGGGGAAAGTAGT
chrA1	6992302	A	AAGGGGAGGGAAGAAGAAAGAAAGAAAGAAAGAAAGAAAGAAAGAAAGAAAGAGAAAGAAAAAGGGAGGGAGGGAGAG	PASS	intergenic_region	MODIFIER	RPL21-LOC123382207	RPL21-LOC123382207	intergenic_region	RPL21-LOC123382207		-1	n.6992302_6992303insAGGGGAGGGAAGAAGAAAGAAAGAAAGAAAGAAAGAAAGAAAGAAAGAAAGAGAAAGAAAAAGGGAGGGAGGGAGAG
chrA1	7366205	A	AAAG	PASS	intergenic_region	MODIFIER	LOC111559488-LOC123382332	LOC111559488-LOC123382332	intergenic_region	LOC111559488-LOC123382332		-1	n.7366205_7366206insAAG
chrA1	7455294	T	TATATATATATATATATATATATATAC	PASS	intergenic_region	MODIFIER	GSX1-TRNAQ-UUG	GSX1-TRNAQ-UUG	intergenic_region	GSX1-TRNAQ-UUG		-1	n.7455294_7455295insATATATATATATATATATATATATAC
chrA1	7787751	TCC	T	PASS	intron_variant	MODIFIER	PAN3	PAN3	transcript	XM_023250322.2	protein_coding	4	c.697-3163_697-3162delCC
chrA1	7787756	C	G	PASS	intron_variant	MODIFIER	PAN3	PAN3	transcript	XM_023250322.2	protein_coding	4	c.697-3159C>G
chrA1	7787778	C	T	PASS	intron_variant	MODIFIER	PAN3	PAN3	transcript	XM_023250322.2	protein_coding	4	c.697-3137C>T
chrA1	9220000	C	T	PASS	intergenic_region	MODIFIER	UBL3-LOC109496855	UBL3-LOC109496855	intergenic_region	UBL3-LOC109496855		-1	n.9220000C>T
chrA1	9220044	G	A	PASS	intergenic_region	MODIFIER	UBL3-LOC109496855	UBL3-LOC109496855	intergenic_region	UBL3-LOC109496855		-1	n.9220044G>A
chrA1	10077505	CCCCCCCA	C	PASS	intergenic_region	MODIFIER	LOC109492552-LOC123383109	LOC109492552-LOC123383109	intergenic_region	LOC109492552-LOC123383109		-1	n.10077506_10077512delCCCCCCA
chrA1	10149571	G	A	PASS	intron_variant	MODIFIER	TEX26	TEX26	transcript	XM_045049927.1	protein_coding	2	c.219-2164G>A
chrA1	10149581	A	C	PASS	intron_variant	MODIFIER	TEX26	TEX26	transcript	XM_045049927.1	protein_coding	2	c.219-2154A>C
chrA1	10149583	G	A	PASS	intron_variant	MODIFIER	TEX26	TEX26	transcript	XM_045049927.1	protein_coding	2	c.219-2152G>A
chrA1	10321346	C	T	PASS	upstream_gene_variant	MODIFIER	LOC102899192	LOC102899192	transcript	XR_006592844.1	pseudogene	-1	n.-677C>T
chrA1	12357722	T	C	PASS	intron_variant	MODIFIER	STARD13	STARD13	transcript	XM_003980318.5	protein_coding	1	c.170-57993A>G
chrA1	12436249	CT	C	PASS	intergenic_region	MODIFIER	STARD13-LOC109497406	STARD13-LOC109497406	intergenic_region	STARD13-LOC109497406		-1	n.12436250delT
chrA1	12559270	TA	T	PASS	intergenic_region	MODIFIER	LOC123385589-RFC3	LOC123385589-RFC3	intergenic_region	LOC123385589-RFC3		-1	n.12559271delA
chrA1	15403471	T	A	PASS	intergenic_region	MODIFIER	LOC123383802-SERTM1	LOC123383802-SERTM1	intergenic_region	LOC123383802-SERTM1		-1	n.15403471T>A
chrA1	15403583	G	A	PASS	intergenic_region	MODIFIER	LOC123383802-SERTM1	LOC123383802-SERTM1	intergenic_region	LOC123383802-SERTM1		-1	n.15403583G>A
chrA1	15403628	G	A	PASS	intergenic_region	MODIFIER	LOC123383802-SERTM1	LOC123383802-SERTM1	intergenic_region	LOC123383802-SERTM1		-1	n.15403628G>A
chrA1	17430598	C	CT	PASS	intron_variant	MODIFIER	STOML3	STOML3	transcript	XM_019825717.3	protein_coding	1	c.53-2626_53-2625insA
chrA1	18992537	C	T	PASS	intron_variant	MODIFIER	SLC25A15	SLC25A15	transcript	XM_045052431.1	protein_coding	1	c.-71+7092C>T
chrA1	18992539	G	A	PASS	intron_variant	MODIFIER	SLC25A15	SLC25A15	transcript	XM_045052431.1	protein_coding	1	c.-71+7094G>A
chrA1	18992540	A	ATGTTTGTTTGTTTGTT	PASS	intron_variant	MODIFIER	SLC25A15	SLC25A15	transcript	XM_045052431.1	protein_coding	1	c.-71+7095_-71+7096insTGTTTGTTTGTTTGTT
chrA1	18992543	TAAG	T	PASS	intron_variant	MODIFIER	SLC25A15	SLC25A15	transcript	XM_045052431.1	protein_coding	1	c.-71+7099_-71+7101delAAG
chrA1	19002019	C	T	PASS	intron_variant	MODIFIER	SLC25A15	SLC25A15	transcript	XM_045052431.1	protein_coding	1	c.-70-11504C>T
chrA1	19168171	C	T	PASS	intron_variant	MODIFIER	LOC101096867	LOC101096867	transcript	XM_019825824.3	protein_coding	10	c.425+3680G>A
chrA1	22833731	A	AATATATAAC	PASS	intron_variant	MODIFIER	RB1	RB1	transcript	XM_023251429.2	protein_coding	18	c.1824-1011_1824-1010insGTTATATAT
chrA1	22833745	A	AATATATAATATAAC	PASS	intron_variant	MODIFIER	RB1	RB1	transcript	XM_023251429.2	protein_coding	18	c.1824-1025_1824-1024insGTTATATTATATAT
chrA1	24739244	G	A	PASS	intron_variant	MODIFIER	RUBCNL	RUBCNL	transcript	XM_023251553.2	protein_coding	13	c.1862-2331G>A
chrA1	24739842	A	C	PASS	intron_variant	MODIFIER	RUBCNL	RUBCNL	transcript	XM_023251553.2	protein_coding	13	c.1862-1733A>C
chrA1	27715783	TGTGTGTGTG	T	PASS	intergenic_region	MODIFIER	DNAJC15-EPSTI1	DNAJC15-EPSTI1	intergenic_region	DNAJC15-EPSTI1		-1	n.27715784_27715792delGTGTGTGTG
chrA1	27868883	G	C	PASS	intron_variant	MODIFIER	LOC109498166	LOC109498166	transcript	XR_006595047.1	pseudogene	4	n.1711+10679G>C
chrA1	27875655	C	T	PASS	intron_variant	MODIFIER	LOC109498166	LOC109498166	transcript	XR_006595047.1	pseudogene	4	n.1711+17451C>T
chrA1	27877274	C	A	PASS	intron_variant	MODIFIER	LOC109498166	LOC109498166	transcript	XR_006595047.1	pseudogene	4	n.1711+19070C>A
chrA1	27887062	G	A	PASS	intron_variant	MODIFIER	LOC109498166	LOC109498166	transcript	XR_006595047.1	pseudogene	4	n.1711+28858G>A
chrA1	27898147	G	A	PASS	intron_variant	MODIFIER	LOC109498166	LOC109498166	transcript	XR_006595047.1	pseudogene	4	n.1711+39943G>A
chrA1	27916318	C	T	PASS	intron_variant	MODIFIER	LOC109498166	LOC109498166	transcript	XR_006595047.1	pseudogene	4	n.1712-28392C>T
chrA1	27932287	CCT	C	PASS	downstream_gene_variant	MODIFIER	FAM216B	FAM216B	transcript	XM_019827152.2	protein_coding	-1	c.*1900_*1901delAG
chrA1	28587635	C	T	PASS	upstream_gene_variant	MODIFIER	DGKH	DGKH	transcript	XM_045053518.1	protein_coding	-1	c.-3747G>A
chrA1	32859654	G	A	PASS	intergenic_region	MODIFIER	LOC101093574-LOC123384347	LOC101093574-LOC123384347	intergenic_region	LOC101093574-LOC123384347		-1	n.32859654G>A
chrA1	33018643	C	T	PASS	intergenic_region	MODIFIER	LOC123384347-LOC101094319	LOC123384347-LOC101094319	intergenic_region	LOC123384347-LOC101094319		-1	n.33018643C>T
chrA1	33263608	G	A	PASS	intergenic_region	MODIFIER	LOC123384347-LOC101094319	LOC123384347-LOC101094319	intergenic_region	LOC123384347-LOC101094319		-1	n.33263608G>A
chrA1	33611354	TAC	T	PASS	intergenic_region	MODIFIER	LOC101094319-LOC123383734	LOC101094319-LOC123383734	intergenic_region	LOC101094319-LOC123383734		-1	n.33611355_33611356delAC
chrA1	33696789	T	TC	PASS	intron_variant	MODIFIER	LOC123383734	LOC123383734	transcript	XR_006593879.1	pseudogene	1	n.68-1529_68-1528insG
chrA1	33696790	T	C	PASS	intron_variant	MODIFIER	LOC123383734	LOC123383734	transcript	XR_006593879.1	pseudogene	1	n.68-1529A>G
chrA1	36143867	AC	A	PASS	intron_variant	MODIFIER	DIAPH3	DIAPH3	transcript	XM_006927330.5	protein_coding	4	c.484-5599delG
chrA1	36680115	A	G	PASS	downstream_gene_variant	MODIFIER	LOC123384377	LOC123384377	transcript	XR_006595396.1	pseudogene	-1	n.*3624A>G
chrA1	37779168	ATTTT	A	PASS	intron_variant	MODIFIER	LOC123384385	LOC123384385	transcript	XR_006595411.1	pseudogene	1	n.352-50706_352-50703delTTTT
chrA1	38666187	A	C	PASS	intergenic_region	MODIFIER	LOC101098510-LOC111557056	LOC101098510-LOC111557056	intergenic_region	LOC101098510-LOC111557056		-1	n.38666187A>C
chrA1	38708958	A	G	PASS	intergenic_region	MODIFIER	LOC101098510-LOC111557056	LOC101098510-LOC111557056	intergenic_region	LOC101098510-LOC111557056		-1	n.38708958A>G
chrA1	39134589	G	T	PASS	intron_variant	MODIFIER	LOC123384391	LOC123384391	transcript	XR_006595426.1	pseudogene	2	n.346-64417G>T
chrA1	40727481	A	G	PASS	intergenic_region	MODIFIER	LOC101101024-LOC109498326	LOC101101024-LOC109498326	intergenic_region	LOC101101024-LOC109498326		-1	n.40727481A>G
chrA1	41052788	C	T	PASS	intergenic_region	MODIFIER	LOC109498326-LOC111556747	LOC109498326-LOC111556747	intergenic_region	LOC109498326-LOC111556747		-1	n.41052788C>T
chrA1	48382798	T	C	PASS	intron_variant	MODIFIER	KLF12	KLF12	transcript	XM_019827919.3	protein_coding	5	c.807-18821A>G
chrA1	50569242	G	A	PASS	intron_variant	MODIFIER	LOC109498550	LOC109498550	transcript	XR_006595727.1	pseudogene	8	n.8378-19844G>A
chrA1	50569248	A	G	PASS	intron_variant	MODIFIER	LOC109498550	LOC109498550	transcript	XR_006595727.1	pseudogene	8	n.8378-19838A>G
chrA1	50576005	A	T	PASS	intron_variant	MODIFIER	LOC109498550	LOC109498550	transcript	XR_006595727.1	pseudogene	8	n.8378-13081A>T
chrA1	50841962	G	GAA	PASS	intergenic_region	MODIFIER	LOC109498550-LOC111560078	LOC109498550-LOC111560078	intergenic_region	LOC109498550-LOC111560078		-1	n.50841962_50841963insAA
chrA1	54767135	A	AATATAT	PASS	downstream_gene_variant	MODIFIER	LOC111556774	LOC111556774	transcript	XR_002736505.1	snRNA	-1	n.*2393_*2394insATATAT
chrA1	54829225	G	A	PASS	intergenic_region	MODIFIER	LOC111556774-LOC123384597	LOC111556774-LOC123384597	intergenic_region	LOC111556774-LOC123384597		-1	n.54829225G>A
chrA1	54829226	C	A	PASS	intergenic_region	MODIFIER	LOC111556774-LOC123384597	LOC111556774-LOC123384597	intergenic_region	LOC111556774-LOC123384597		-1	n.54829226C>A
chrA1	54830276	G	A	PASS	intergenic_region	MODIFIER	LOC111556774-LOC123384597	LOC111556774-LOC123384597	intergenic_region	LOC111556774-LOC123384597		-1	n.54830276G>A
chrA1	58926009	TATTA	T	PASS	intron_variant	MODIFIER	LOC123384622	LOC123384622	transcript	XR_006596000.1	pseudogene	1	n.217+13552_217+13555delATTA
chrA1	58991242	T	G	PASS	intron_variant	MODIFIER	LOC123384622	LOC123384622	transcript	XR_006596000.1	pseudogene	1	n.218-22807T>G
chrA1	59094437	T	C	PASS	intron_variant	MODIFIER	LOC123384622	LOC123384622	transcript	XR_006596000.1	pseudogene	2	n.314-12110T>C
chrA1	59515741	G	T	PASS	intron_variant	MODIFIER	LOC123384629	LOC123384629	transcript	XR_006596014.1	pseudogene	2	n.1005+24630G>T
chrA1	59551376	C	T	PASS	intron_variant	MODIFIER	LOC123384629	LOC123384629	transcript	XR_006596014.1	pseudogene	2	n.1006-47214C>T
chrA1	59845833	T	C	PASS	intergenic_region	MODIFIER	LOC123386019-LOC101093235	LOC123386019-LOC101093235	intergenic_region	LOC123386019-LOC101093235		-1	n.59845833T>C
chrA1	60531233	TATATATAC	T	PASS	intron_variant	MODIFIER	LOC101093984	LOC101093984	transcript	XR_006596075.1	pseudogene	6	n.554-35048_554-35041delGTATATAT
chrA1	61183350	G	A	PASS	intron_variant	MODIFIER	LOC123384639	LOC123384639	transcript	XR_006596050.1	pseudogene	3	n.640+58588G>A
chrA1	61455701	C	T	PASS	intergenic_region	MODIFIER	LOC123384639-LOC111556882	LOC123384639-LOC111556882	intergenic_region	LOC123384639-LOC111556882		-1	n.61455701C>T
chrA1	62081954	C	T	PASS	intergenic_region	MODIFIER	LOC111556882-LOC111557078	LOC111556882-LOC111557078	intergenic_region	LOC111556882-LOC111557078		-1	n.62081954C>T
chrA1	62515984	G	T	PASS	intergenic_region	MODIFIER	LOC111557078-LOC111560123	LOC111557078-LOC111560123	intergenic_region	LOC111557078-LOC111560123		-1	n.62515984G>T
chrA1	64096090	T	TCCC	PASS	downstream_gene_variant	MODIFIER	GPC5	GPC5	transcript	XM_045055059.1	protein_coding	-1	c.*5422_*5423insCCC
chrA1	69453941	T	C	PASS	intergenic_region	MODIFIER	IPO5-FARP1	IPO5-FARP1	intergenic_region	IPO5-FARP1		-1	n.69453941T>C
chrA1	71107229	TCC	T	PASS	intergenic_region	MODIFIER	CLYBL-ZIC5	CLYBL-ZIC5	intergenic_region	CLYBL-ZIC5		-1	n.71107230_71107231delCC
chrA1	71107233	TCCCTCCCTCC	T	PASS	intergenic_region	MODIFIER	CLYBL-ZIC5	CLYBL-ZIC5	intergenic_region	CLYBL-ZIC5		-1	n.71107234_71107243delCCCTCCCTCC
chrA1	71131229	TGCG	T	PASS	upstream_gene_variant	MODIFIER	ZIC5	ZIC5	transcript	XM_023252902.2	protein_coding	-1	c.-1261_-1259delCGC
chrA1	74188134	T	TA	PASS	intergenic_region	MODIFIER	LOC111557083-LOC101086443	LOC111557083-LOC101086443	intergenic_region	LOC111557083-LOC101086443		-1	n.74188134_74188135insA
chrA1	74320298	G	A	PASS	intergenic_region	MODIFIER	LOC111557083-LOC101086443	LOC111557083-LOC101086443	intergenic_region	LOC111557083-LOC101086443		-1	n.74320298G>A
chrA1	74803498	C	T	PASS	intergenic_region	MODIFIER	LOC111557083-LOC101086443	LOC111557083-LOC101086443	intergenic_region	LOC111557083-LOC101086443		-1	n.74803498C>T
chrA1	75990956	A	C	PASS	intergenic_region	MODIFIER	LOC123383989-LOC101087193	LOC123383989-LOC101087193	intergenic_region	LOC123383989-LOC101087193		-1	n.75990956A>C
chrA1	76107198	TTTC	T	PASS	intergenic_region	MODIFIER	LOC123383989-LOC101087193	LOC123383989-LOC101087193	intergenic_region	LOC123383989-LOC101087193		-1	n.76107199_76107201delTTC
chrA1	87710514	C	T	PASS	intergenic_region	MODIFIER	LOC101097538-LOC101097782	LOC101097538-LOC101097782	intergenic_region	LOC101097538-LOC101097782		-1	n.87710514C>T
chrA1	88676070	AGTG	A	PASS	intron_variant	MODIFIER	LOC109497081	LOC109497081	transcript	XM_045056897.1	protein_coding	3	c.3-179_3-177delGTG
chrA1	88676074	ATC	A	PASS	intron_variant	MODIFIER	LOC109497081	LOC109497081	transcript	XM_045056897.1	protein_coding	3	c.3-175_3-174delTC
chrA1	88849175	A	G	PASS	intergenic_region	MODIFIER	LOC123385181-LOC123385184	LOC123385181-LOC123385184	intergenic_region	LOC123385181-LOC123385184		-1	n.88849175A>G
chrA1	89477436	T	A	PASS	intergenic_region	MODIFIER	LOC101094232-FELCATV1R2	LOC101094232-FELCATV1R2	intergenic_region	LOC101094232-FELCATV1R2		-1	n.89477436T>A
chrA1	91481983	G	GAAT	PASS	downstream_gene_variant	MODIFIER	LOC123385369	LOC123385369	transcript	XR_006597781.1	pseudogene	-1	n.*4989_*4990insATT
chrA1	95455577	GTC	G	PASS	intron_variant	MODIFIER	LOC123385477	LOC123385477	transcript	XR_006598062.1	pseudogene	1	n.206+47895_206+47896delTC
chrA1	95455708	G	A	PASS	intron_variant	MODIFIER	LOC123385477	LOC123385477	transcript	XR_006598062.1	pseudogene	1	n.206+48025G>A
chrA1	95487182	T	TAC	PASS	intron_variant	MODIFIER	LOC123385477	LOC123385477	transcript	XR_006598062.1	pseudogene	1	n.206+79499_206+79500insAC
chrA1	95500245	G	A	PASS	intron_variant	MODIFIER	LOC123385477	LOC123385477	transcript	XR_006598062.1	pseudogene	1	n.206+92562G>A
chrA1	95528459	A	C	PASS	intron_variant	MODIFIER	LOC123385477	LOC123385477	transcript	XR_006598062.1	pseudogene	1	n.206+120776A>C
chrA1	95528463	A	C	PASS	intron_variant	MODIFIER	LOC123385477	LOC123385477	transcript	XR_006598062.1	pseudogene	1	n.206+120780A>C
chrA1	95630937	A	C	PASS	intron_variant	MODIFIER	LOC123385477	LOC123385477	transcript	XR_006598062.1	pseudogene	1	n.207-22177A>C
chrA1	95648677	T	G	PASS	intron_variant	MODIFIER	LOC123385477	LOC123385477	transcript	XR_006598062.1	pseudogene	1	n.207-4437T>G
chrA1	95664094	A	G	PASS	intron_variant	MODIFIER	LOC123385477	LOC123385477	transcript	XR_006598062.1	pseudogene	2	n.328+10859A>G
chrA1	96063275	T	C	PASS	intron_variant	MODIFIER	LOC123385481	LOC123385481	transcript	XR_006598082.1	pseudogene	2	n.346-4572T>C
chrA1	97481172	C	G	PASS	intron_variant	MODIFIER	DMXL1	DMXL1	transcript	XM_019831227.3	protein_coding	8	c.933+889C>G
chrA1	99288850	G	A	PASS	intergenic_region	MODIFIER	LOC102901339-LOC123385545	LOC102901339-LOC123385545	intergenic_region	LOC102901339-LOC123385545		-1	n.99288850G>A
chrA1	102698483	T	C	PASS	downstream_gene_variant	MODIFIER	LOC123385623	LOC123385623	transcript	XR_006598508.1	pseudogene	-1	n.*51T>C
chrA1	107100223	G	GC	PASS	intron_variant	MODIFIER	CHSY3	CHSY3	transcript	XM_023254802.2	protein_coding	2	c.1092+71430_1092+71431insC
chrA1	111474286	T	G	PASS	intron_variant	MODIFIER	PCBD2	PCBD2	transcript	XM_023255386.2	protein_coding	2	c.217-1295T>G
chrA1	111481539	C	T	PASS	upstream_gene_variant	MODIFIER	CATSPER3	CATSPER3	transcript	XM_003980777.6	protein_coding	-1	c.-1458C>T
chrA1	114407627	A	G	PASS	intron_variant	MODIFIER	BRD8	BRD8	transcript	XM_045059535.1	protein_coding	13	c.1951-1275T>C
chrA1	116100319	G	A	PASS	intron_variant	MODIFIER	CYSTM1	CYSTM1	transcript	XM_019833029.2	protein_coding	1	c.101-8693G>A
chrA1	116117882	G	T	PASS	upstream_gene_variant	MODIFIER	LOC109500859	LOC109500859	transcript	XR_002158674.3	pseudogene	-1	n.-3723C>A
chrA1	116127003	C	T	PASS	intron_variant	MODIFIER	CYSTM1	CYSTM1	transcript	XM_019833029.2	protein_coding	2	c.322+17770C>T
chrA1	116127434	C	T	PASS	intron_variant	MODIFIER	CYSTM1	CYSTM1	transcript	XM_019833029.2	protein_coding	2	c.322+18201C>T
chrA1	116138604	T	C	PASS	downstream_gene_variant	MODIFIER	CYSTM1	CYSTM1	transcript	XM_019833036.3	protein_coding	-1	c.*2872T>C
chrA1	116166694	C	T	PASS	intron_variant	MODIFIER	PFDN1	PFDN1	transcript	XM_003980829.5	protein_coding	3	c.286-11637G>A
chrA1	116173208	G	A	PASS	intron_variant	MODIFIER	PFDN1	PFDN1	transcript	XM_003980829.5	protein_coding	3	c.285+15021C>T
chrA1	121216028	G	C	PASS	intron_variant	MODIFIER	SH3RF2	SH3RF2	transcript	XM_019833842.3	protein_coding	1	c.-112-207G>C
chrA1	121217893	TG	T	PASS	intron_variant	MODIFIER	SH3RF2	SH3RF2	transcript	XM_019833842.3	protein_coding	2	c.378+1170delG
chrA1	121218711	C	T	PASS	intron_variant	MODIFIER	SH3RF2	SH3RF2	transcript	XM_019833842.3	protein_coding	2	c.378+1987C>T
chrA1	121224315	A	ATAAG	PASS	intron_variant	MODIFIER	SH3RF2	SH3RF2	transcript	XM_019833842.3	protein_coding	2	c.378+7591_378+7592insTAAG
chrA1	121244255	T	G	PASS	intron_variant	MODIFIER	SH3RF2	SH3RF2	transcript	XM_019833842.3	protein_coding	2	c.379-23202T>G
chrA1	121278801	C	T	PASS	intron_variant	MODIFIER	SH3RF2	SH3RF2	transcript	XM_019833842.3	protein_coding	4	c.745-83C>T
chrA1	121286389	T	G	PASS	intron_variant	MODIFIER	SH3RF2	SH3RF2	transcript	XM_019833842.3	protein_coding	5	c.1068+7182T>G
chrA1	121307044	C	T	PASS	intron_variant	MODIFIER	SH3RF2	SH3RF2	transcript	XM_019833842.3	protein_coding	5	c.1069-9396C>T
chrA1	121307051	G	T	PASS	intron_variant	MODIFIER	SH3RF2	SH3RF2	transcript	XM_019833842.3	protein_coding	5	c.1069-9389G>T
chrA1	121307065	C	G	PASS	intron_variant	MODIFIER	SH3RF2	SH3RF2	transcript	XM_019833842.3	protein_coding	5	c.1069-9375C>G
chrA1	121316383	G	A	PASS	intron_variant	MODIFIER	SH3RF2	SH3RF2	transcript	XM_019833842.3	protein_coding	5	c.1069-57G>A
chrA1	121353719	A	G	PASS	missense_variant	MODERATE	PLAC8L1	PLAC8L1	transcript	XM_003980987.5	protein_coding	3	c.284T>C	p.Met95Thr
chrA1	121372870	G	A	PASS	upstream_gene_variant	MODIFIER	PLAC8L1	PLAC8L1	transcript	XM_003980987.5	protein_coding	-1	c.-1550C>T
chrA1	121399661	G	A	PASS	downstream_gene_variant	MODIFIER	TRNAK-CUU_2	TRNAK-CUU_2	transcript	unassigned_transcript_25	protein_coding	-1	c.*1898C>T
chrA1	121400002	T	A	PASS	downstream_gene_variant	MODIFIER	TRNAK-CUU_2	TRNAK-CUU_2	transcript	unassigned_transcript_25	protein_coding	-1	c.*1557A>T
chrA1	121446055	A	G	PASS	intron_variant	MODIFIER	LARS1	LARS1	transcript	XM_045060528.1	protein_coding	4	c.294+20T>C
chrA1	121468501	T	A	PASS	intergenic_region	MODIFIER	LARS1-RBM27	LARS1-RBM27	intergenic_region	LARS1-RBM27		-1	n.121468501T>A
chrA1	121469740	G	A	PASS	intergenic_region	MODIFIER	LARS1-RBM27	LARS1-RBM27	intergenic_region	LARS1-RBM27		-1	n.121469740G>A
chrA1	121472030	A	G	PASS	upstream_gene_variant	MODIFIER	RBM27	RBM27	transcript	XM_023256343.2	protein_coding	-1	c.-3554A>G
chrA1	121472249	C	T	PASS	upstream_gene_variant	MODIFIER	RBM27	RBM27	transcript	XM_023256343.2	protein_coding	-1	c.-3335C>T
chrA1	121481003	G	GCGCAGAGCCTAACAATGGTGCT	PASS	intron_variant	MODIFIER	RBM27	RBM27	transcript	XM_023256343.2	protein_coding	1	c.59+5361_59+5362insCGCAGAGCCTAACAATGGTGCT
chrA1	121522068	CTCCCTT	C	PASS	intron_variant	MODIFIER	RBM27	RBM27	transcript	XM_023256343.2	protein_coding	12	c.1890+1288_1890+1293delTCCCTT
chrA1	121526712	G	A	PASS	intron_variant	MODIFIER	RBM27	RBM27	transcript	XM_023256343.2	protein_coding	14	c.2328+844G>A
chrA1	121535729	C	CAA	PASS	intron_variant	MODIFIER	RBM27	RBM27	transcript	XM_023256343.2	protein_coding	19	c.2985+1441_2985+1442insAA
chrA1	121562664	A	AT	PASS	intergenic_region	MODIFIER	RBM27-POU4F3	RBM27-POU4F3	intergenic_region	RBM27-POU4F3		-1	n.121562664_121562665insT
chrA1	121567419	G	T	PASS	intergenic_region	MODIFIER	RBM27-POU4F3	RBM27-POU4F3	intergenic_region	RBM27-POU4F3		-1	n.121567419G>T
chrA1	121578504	G	A	PASS	intergenic_region	MODIFIER	RBM27-POU4F3	RBM27-POU4F3	intergenic_region	RBM27-POU4F3		-1	n.121578504G>A
chrA1	121590238	G	A	PASS	intergenic_region	MODIFIER	RBM27-POU4F3	RBM27-POU4F3	intergenic_region	RBM27-POU4F3		-1	n.121590238G>A
chrA1	121594306	T	C	PASS	upstream_gene_variant	MODIFIER	POU4F3	POU4F3	transcript	XM_003980945.5	protein_coding	-1	c.-2706T>C
chrA1	121595621	G	T	PASS	upstream_gene_variant	MODIFIER	POU4F3	POU4F3	transcript	XM_003980945.5	protein_coding	-1	c.-1391G>T
chrA1	122792719	TAA	T	PASS	intron_variant	MODIFIER	JAKMIP2	JAKMIP2	transcript	XM_045060662.1	protein_coding	16	c.1995+2172_1995+2173delTT
chrA1	122792722	TGTTTATTTATTTATTATTTTTTTTATTTTATTTTATTTTTTTTAATTTTTTTTTTTTCAACGTTTATTTATTTTTGGGACAGAGAGAGACAGAGCATGAACGGGGGAGGGGCAGAGAGAGAGGGAGACACAGAATCGGAAACAGGCTCCAGGCTCCGAGCCATCAGCCCAGAGCCCGACGCGGGGCTCGAACTCACGGACCGCGAGATCGTGACCTGGCTGAAGTCGGACGCTTAACCGACTGCGCCACCCAGGCGCCCC	T	PASS	intron_variant	MODIFIER	JAKMIP2	JAKMIP2	transcript	XM_045060662.1	protein_coding	16	c.1995+1911_1995+2170del
chrA1	125814387	ATATATATATAT	A	PASS	intergenic_region	MODIFIER	ACTBL2-LOC109501462	ACTBL2-LOC109501462	intergenic_region	ACTBL2-LOC109501462		-1	n.125814388_125814398delTATATATATAT
chrA1	128051286	C	G	PASS	intron_variant	MODIFIER	PDE4D	PDE4D	transcript	XM_045040048.1	protein_coding	1	c.-92-89633G>C
chrA1	129409375	G	A	PASS	intergenic_region	MODIFIER	LOC123386500-LOC123386501	LOC123386500-LOC123386501	intergenic_region	LOC123386500-LOC123386501		-1	n.129409375G>A
chrA1	129417926	C	T	PASS	intergenic_region	MODIFIER	LOC123386500-LOC123386501	LOC123386500-LOC123386501	intergenic_region	LOC123386500-LOC123386501		-1	n.129417926C>T
chrA1	131025582	C	T	PASS	intergenic_region	MODIFIER	LOC123384828-LOC111556700	LOC123384828-LOC111556700	intergenic_region	LOC123384828-LOC111556700		-1	n.131025582C>T
chrA1	132325367	G	C	PASS	intron_variant	MODIFIER	ADAMTS6	ADAMTS6	transcript	XM_023257025.2	protein_coding	6	c.1074-16240C>G
chrA1	135197963	G	A	PASS	intergenic_region	MODIFIER	LOC123386576-LOC123386573	LOC123386576-LOC123386573	intergenic_region	LOC123386576-LOC123386573		-1	n.135197963G>A
chrA1	135198128	A	G	PASS	intergenic_region	MODIFIER	LOC123386576-LOC123386573	LOC123386576-LOC123386573	intergenic_region	LOC123386576-LOC123386573		-1	n.135198128A>G
chrA1	135247236	A	T	PASS	intergenic_region	MODIFIER	LOC123386576-LOC123386573	LOC123386576-LOC123386573	intergenic_region	LOC123386576-LOC123386573		-1	n.135247236A>T
chrA1	135267353	C	T	PASS	intergenic_region	MODIFIER	LOC123386576-LOC123386573	LOC123386576-LOC123386573	intergenic_region	LOC123386576-LOC123386573		-1	n.135267353C>T
chrA1	135267360	G	A	PASS	intergenic_region	MODIFIER	LOC123386576-LOC123386573	LOC123386576-LOC123386573	intergenic_region	LOC123386576-LOC123386573		-1	n.135267360G>A
chrA1	135267435	G	A	PASS	intergenic_region	MODIFIER	LOC123386576-LOC123386573	LOC123386576-LOC123386573	intergenic_region	LOC123386576-LOC123386573		-1	n.135267435G>A
chrA1	136129355	C	CAG	PASS	intron_variant	MODIFIER	BDP1	BDP1	transcript	XM_011283883.3	protein_coding	3	c.596+283_596+284insAG
chrA1	138275691	G	GA	PASS	intron_variant	MODIFIER	ARHGEF28	ARHGEF28	transcript	XM_011283815.4	protein_coding	22	c.2820+822_2820+823insA
chrA1	138453510	G	A	PASS	intergenic_region	MODIFIER	ARHGEF28-TRNAQ-UUG_3	ARHGEF28-TRNAQ-UUG_3	intergenic_region	ARHGEF28-TRNAQ-UUG_3		-1	n.138453510G>A
chrA1	138841201	T	G	PASS	intergenic_region	MODIFIER	LOC123386641-LOC109492902	LOC123386641-LOC109492902	intergenic_region	LOC123386641-LOC109492902		-1	n.138841201T>G
chrA1	139293199	G	GT	PASS	intron_variant	MODIFIER	LOC123386659	LOC123386659	transcript	XR_006600900.1	pseudogene	2	n.412-610_412-609insA
chrA1	142782811	A	ACACACATATATATATGTATGTATATATATGTGTGTGTATATGTGTGTGTATG	PASS	upstream_gene_variant	MODIFIER	ARSB	ARSB	transcript	NM_001142259.1	protein_coding	-1	c.-2965_-2964insCATACACACACATATACACACACATATATATACATACATATATATATGTGTG
chrA1	142951462	AGG	A	PASS	intergenic_region	MODIFIER	BHMT-LOC101085778	BHMT-LOC101085778	intergenic_region	BHMT-LOC101085778		-1	n.142951463_142951464delGG
chrA1	142951465	AAG	A	PASS	intergenic_region	MODIFIER	BHMT-LOC101085778	BHMT-LOC101085778	intergenic_region	BHMT-LOC101085778		-1	n.142951466_142951467delAG
chrA1	144731331	A	C	PASS	intron_variant	MODIFIER	LOC102900440	LOC102900440	transcript	XR_439534.3	pseudogene	2	n.314-16815T>G
chrA1	149281757	T	TTAA	PASS	downstream_gene_variant	MODIFIER	LOC102899183	LOC102899183	transcript	XM_045033341.1	protein_coding	-1	c.*4098_*4099insTAA
chrA1	150320373	TA	T	PASS	intergenic_region	MODIFIER	LOC109502164-TMEM161B	LOC109502164-TMEM161B	intergenic_region	LOC109502164-TMEM161B		-1	n.150320374delA
chrA1	152454783	G	GAGGAGGAGGAGGAGGAGGAGGAGGAGGAGGAGGAGGAGGAAGAAGAAGAAGAAGAAGAAGAAGAAGAAGAAGAAGAAGAAGAAGA	PASS	intron_variant	MODIFIER	LOC109502228	LOC109502228	transcript	XR_006583074.1	pseudogene	1	n.3554+14018_3554+14019insTCTTCTTCTTCTTCTTCTTCTTCTTCTTCTTCTTCTTCTTCTTCTTCCTCCTCCTCCTCCTCCTCCTCCTCCTCCTCCTCCTCCT
chrA1	156959665	A	T	PASS	intron_variant	MODIFIER	MCTP1	MCTP1	transcript	XM_023258485.2	protein_coding	1	c.723+114T>A
chrA1	157055314	T	A	PASS	intron_variant	MODIFIER	FAM81B	FAM81B	transcript	XM_003981156.6	protein_coding	3	c.173+5266T>A
chrA1	157102169	C	T	PASS	downstream_gene_variant	MODIFIER	FAM81B	FAM81B	transcript	XM_003981156.6	protein_coding	-1	c.*1311C>T
chrA1	157104376	C	T	PASS	downstream_gene_variant	MODIFIER	FAM81B	FAM81B	transcript	XM_003981156.6	protein_coding	-1	c.*3518C>T
chrA1	157757275	CAT	C	PASS	intron_variant	MODIFIER	LOC111561730	LOC111561730	transcript	XR_006583246.1	pseudogene	7	n.2065-5207_2065-5206delAT
chrA1	158606835	C	T	PASS	intron_variant	MODIFIER	LOC109502451	LOC109502451	transcript	XM_045033960.1	protein_coding	2	c.160-334C>T
chrA1	168693041	T	TGG	PASS	intron_variant	MODIFIER	FER	FER	transcript	XM_023258902.2	protein_coding	5	c.481+3493_481+3494insGG
chrA1	168926489	A	ATATCAAATGCATCATTTTGTACTTTTCTATTCTGAGTGCTAAAATAACATAGC	PASS	intron_variant	MODIFIER	FER	FER	transcript	XM_023258902.2	protein_coding	16	c.1925-14832_1925-14831insTATCAAATGCATCATTTTGTACTTTTCTATTCTGAGTGCTAAAATAACATAGC
chrA1	170459173	C	T	PASS	intergenic_region	MODIFIER	LOC123379306-TSLP	LOC123379306-TSLP	intergenic_region	LOC123379306-TSLP		-1	n.170459173C>T
chrA1	170981674	C	A	PASS	intron_variant	MODIFIER	LOC111561785	LOC111561785	transcript	XR_006583666.1	pseudogene	2	n.410+42253C>A
chrA1	170981782	ATT	A	PASS	intron_variant	MODIFIER	LOC111561785	LOC111561785	transcript	XR_006583666.1	pseudogene	2	n.410+42362_410+42363delTT
chrA1	171653407	G	A	PASS	intron_variant	MODIFIER	EPB41L4A	EPB41L4A	transcript	XM_019838056.3	protein_coding	1	c.99+33980C>T
chrA1	171653420	G	C	PASS	intron_variant	MODIFIER	EPB41L4A	EPB41L4A	transcript	XM_019838056.3	protein_coding	1	c.99+33967C>G
chrA1	171917417	T	TTCTTTCTTTCTTTCTC	PASS	intron_variant	MODIFIER	APC	APC	transcript	XM_019838005.3	protein_coding	1	c.169-24411_169-24410insTCTTTCTTTCTTTCTC
chrA1	172231114	CACAT	C	PASS	intron_variant	MODIFIER	MCC	MCC	transcript	XM_045034744.1	protein_coding	8	c.1399-2167_1399-2164delATGT
chrA1	173027938	AAAG	A	PASS	intron_variant	MODIFIER	NSD1	NSD1	transcript	XM_006927884.5	protein_coding	2	c.927+10983_927+10985delCTT
chrA1	173929789	T	C	PASS	intron_variant	MODIFIER	THOC3	THOC3	transcript	XM_045035178.1	protein_coding	2	c.-167+27112T>C
chrA1	174162214	G	A	PASS	intergenic_region	MODIFIER	CPLX2-HRH2	CPLX2-HRH2	intergenic_region	CPLX2-HRH2		-1	n.174162214G>A
chrA1	174162511	C	T	PASS	intergenic_region	MODIFIER	CPLX2-HRH2	CPLX2-HRH2	intergenic_region	CPLX2-HRH2		-1	n.174162511C>T
chrA1	174186431	A	C	PASS	intron_variant	MODIFIER	HRH2	HRH2	transcript	XM_023259434.2	protein_coding	2	c.1077-2948T>G
chrA1	174205682	G	A	PASS	downstream_gene_variant	MODIFIER	HRH2	HRH2	transcript	XM_023259433.2	protein_coding	-1	c.*6086C>T
chrA1	174244638	G	A	PASS	intron_variant	MODIFIER	HRH2	HRH2	transcript	XM_045035204.1	protein_coding	1	c.-503-3703C>T
chrA1	174748232	AGGATGGATGGATGGATAGGT	A	PASS	intergenic_region	MODIFIER	LOC109502872-MSX2	LOC109502872-MSX2	intergenic_region	LOC109502872-MSX2		-1	n.174748233_174748252delGGATGGATGGATGGATAGGT
chrA1	174993423	T	TGTGATGAGGGCGGAGGTGAATCTAATGCTGGCAG	PASS	intergenic_region	MODIFIER	MSX2-LOC123385099	MSX2-LOC123385099	intergenic_region	MSX2-LOC123385099		-1	n.174993423_174993424insGTGATGAGGGCGGAGGTGAATCTAATGCTGGCAG
chrA1	174993426	A	AAGCAGTTGTAGAACTGGGGAGGGCTGAGGCATGGCATAAAGCCTGGCTATGAACCCCGATGTCTCCTAAC	PASS	intergenic_region	MODIFIER	MSX2-LOC123385099	MSX2-LOC123385099	intergenic_region	MSX2-LOC123385099		-1	n.174993426_174993427insAGCAGTTGTAGAACTGGGGAGGGCTGAGGCATGGCATAAAGCCTGGCTATGAACCCCGATGTCTCCTAAC
chrA1	175196463	A	C	PASS	intergenic_region	MODIFIER	LOC123379509-LOC123385109	LOC123379509-LOC123385109	intergenic_region	LOC123379509-LOC123385109		-1	n.175196463A>C
chrA1	176524328	A	T	PASS	upstream_gene_variant	MODIFIER	LOC109492978	LOC109492978	transcript	XR_006584125.1	pseudogene	-1	n.-3512A>T
chrA1	176847709	TCTTTCAAGTTTATTTA	T	PASS	intron_variant	MODIFIER	SH3PXD2B	SH3PXD2B	transcript	XM_023259607.2	protein_coding	7	c.563-625_563-610delCTTTCAAGTTTATTTA
chrA1	176915835	C	T	PASS	intron_variant	MODIFIER	UBTD2	UBTD2	transcript	XM_023259612.2	protein_coding	1	c.70+9756C>T
chrA1	184727458	TCAGGCTC	T	PASS	intron_variant	MODIFIER	LOC123379622	LOC123379622	transcript	XR_006584307.1	pseudogene	1	n.256+5093_256+5099delGAGCCTG
chrA1	187464097	G	A	PASS	synonymous_variant	LOW	LOC123379493	LOC123379493	transcript	XM_045035194.1	protein_coding	1	c.318G>A	p.Glu106Glu
chrA1	187464959	T	C	PASS	intron_variant	MODIFIER	LOC123379493	LOC123379493	transcript	XM_045035194.1	protein_coding	1	c.923+257T>C
chrA1	187465524	TG	T	PASS	intron_variant	MODIFIER	LOC123379493	LOC123379493	transcript	XM_045035194.1	protein_coding	1	c.924-118delG
chrA1	187465576	G	A	PASS	intron_variant	MODIFIER	LOC123379493	LOC123379493	transcript	XM_045035194.1	protein_coding	1	c.924-67G>A
chrA1	187465989	C	T	PASS	splice_region_variant&intron_variant	LOW	LOC123379493	LOC123379493	transcript	XM_045035194.1	protein_coding	2	c.1264+6C>T
chrA1	191264117	A	ATATC	PASS	intron_variant	MODIFIER	SGCD	SGCD	transcript	XM_045036411.1	protein_coding	1	c.-154-49634_-154-49633insGATA
chrA1	197783179	G	A	PASS	intron_variant	MODIFIER	HTR4	HTR4	transcript	XM_023260627.2	protein_coding	4	c.354-6341G>A
chrA1	197784295	G	GAA	PASS	intron_variant	MODIFIER	HTR4	HTR4	transcript	XM_023260627.2	protein_coding	4	c.354-5225_354-5224insAA
chrA1	198927133	A	AAGAAT	PASS	intron_variant	MODIFIER	ARL15	ARL15	transcript	XM_045037206.1	protein_coding	4	c.463-70958_463-70957insAGAAT
chrA1	199808055	TTCCCCCCGC	T	PASS	intron_variant	MODIFIER	ITGA2	ITGA2	transcript	XM_045037280.1	protein_coding	4	c.376-118_376-110delGCGGGGGGA
chrA1	204910454	TC	T	PASS	intron_variant	MODIFIER	GHR	GHR	transcript	XM_045037560.1	protein_coding	2	c.140-38917delG
chrA1	204910462	T	C	PASS	intron_variant	MODIFIER	GHR	GHR	transcript	XM_045037560.1	protein_coding	2	c.140-38924A>G
chrA1	204910468	CTTCTTT	C	PASS	intron_variant	MODIFIER	GHR	GHR	transcript	XM_045037560.1	protein_coding	2	c.140-38936_140-38931delAAAGAA
chrA1	204910476	CTT	C	PASS	intron_variant	MODIFIER	GHR	GHR	transcript	XM_045037560.1	protein_coding	2	c.140-38940_140-38939delAA
chrA1	204910480	T	A	PASS	intron_variant	MODIFIER	GHR	GHR	transcript	XM_045037560.1	protein_coding	2	c.140-38942A>T
chrA1	204910481	T	G	PASS	intron_variant	MODIFIER	GHR	GHR	transcript	XM_045037560.1	protein_coding	2	c.140-38943A>C
chrA1	205203890	C	A	PASS	intergenic_region	MODIFIER	LOC109491814-LOC111556728	LOC109491814-LOC111556728	intergenic_region	LOC109491814-LOC111556728		-1	n.205203890C>A
chrA1	208969791	CCCA	C	PASS	intron_variant	MODIFIER	WDR70	WDR70	transcript	XM_019811747.2	protein_coding	10	c.1096-19900_1096-19898delTGG
chrA1	209126557	G	A	PASS	intron_variant	MODIFIER	WDR70	WDR70	transcript	XM_019811747.2	protein_coding	7	c.689+9468C>T
chrA1	212012733	T	A	PASS	upstream_gene_variant	MODIFIER	ADAMTS12	ADAMTS12	transcript	XM_045038312.1	protein_coding	-1	c.-4353T>A
chrA1	214600046	T	C	PASS	intergenic_region	MODIFIER	CDH6-LOC101082214	CDH6-LOC101082214	intergenic_region	CDH6-LOC101082214		-1	n.214600046T>C
chrA1	215413973	A	AATAGTGGTACCTGTAACCATTTCAGGGGACTAGCATGGCCTACATAATCTAAATGGCTAAAATAGTCAGTAAAGACAATTCAGCTTTAATTTCTAAATTACTCTAAAAAGTAGAC	PASS	intron_variant	MODIFIER	LOC123380389	LOC123380389	transcript	XR_006586083.1	pseudogene	2	n.362+6405_362+6406insATAGTGGTACCTGTAACCATTTCAGGGGACTAGCATGGCCTACATAATCTAAATGGCTAAAATAGTCAGTAAAGACAATTCAGCTTTAATTTCTAAATTACTCTAAAAAGTAGAC
chrA1	217296537	T	C	PASS	intergenic_region	MODIFIER	LOC101083744-CDH9	LOC101083744-CDH9	intergenic_region	LOC101083744-CDH9		-1	n.217296537T>C
chrA1	219160139	T	A	PASS	intergenic_region	MODIFIER	LOC123380398-LOC101086038	LOC123380398-LOC101086038	intergenic_region	LOC123380398-LOC101086038		-1	n.219160139T>A
chrA1	219193873	G	T	PASS	intergenic_region	MODIFIER	LOC101086038-LOC123380402	LOC101086038-LOC123380402	intergenic_region	LOC101086038-LOC123380402		-1	n.219193873G>T
chrA1	219257723	T	A	PASS	intron_variant	MODIFIER	LOC123380402	LOC123380402	transcript	XR_006586110.1	pseudogene	1	n.98-2512T>A
chrA1	219543829	AT	A	PASS	intron_variant	MODIFIER	CDH10	CDH10	transcript	XM_011286675.4	protein_coding	2	c.232-22940delT
chrA1	219836249	A	T	PASS	intragenic_variant	MODIFIER	LOC101086539	LOC101086539	gene_variant	LOC101086539		-1	n.219836249A>T
chrA1	219874391	T	C	PASS	intergenic_region	MODIFIER	LOC101086539-CDH12	LOC101086539-CDH12	intergenic_region	LOC101086539-CDH12		-1	n.219874391T>C
chrA1	220230671	T	G	PASS	intergenic_region	MODIFIER	LOC101086539-CDH12	LOC101086539-CDH12	intergenic_region	LOC101086539-CDH12		-1	n.220230671T>G
chrA1	220247862	A	T	PASS	intergenic_region	MODIFIER	LOC101086539-CDH12	LOC101086539-CDH12	intergenic_region	LOC101086539-CDH12		-1	n.220247862A>T
chrA1	220247864	A	G	PASS	intergenic_region	MODIFIER	LOC101086539-CDH12	LOC101086539-CDH12	intergenic_region	LOC101086539-CDH12		-1	n.220247864A>G
chrA1	220247870	ATATTTGTG	A	PASS	intergenic_region	MODIFIER	LOC101086539-CDH12	LOC101086539-CDH12	intergenic_region	LOC101086539-CDH12		-1	n.220247871_220247878delTATTTGTG
chrA1	220284996	A	T	PASS	intergenic_region	MODIFIER	LOC101086539-CDH12	LOC101086539-CDH12	intergenic_region	LOC101086539-CDH12		-1	n.220284996A>T
chrA1	220284997	T	G	PASS	intergenic_region	MODIFIER	LOC101086539-CDH12	LOC101086539-CDH12	intergenic_region	LOC101086539-CDH12		-1	n.220284997T>G
chrA1	220486496	G	A	PASS	intergenic_region	MODIFIER	LOC101086539-CDH12	LOC101086539-CDH12	intergenic_region	LOC101086539-CDH12		-1	n.220486496G>A
chrA1	220771682	T	TTTCC	PASS	upstream_gene_variant	MODIFIER	CDH12	CDH12	transcript	XM_019812450.3	protein_coding	-1	c.-3600_-3599insTTCC
chrA1	221147327	C	A	PASS	intron_variant	MODIFIER	CDH12	CDH12	transcript	XM_019812450.3	protein_coding	1	c.-418-2988C>A
chrA1	221150769	T	A	PASS	intron_variant	MODIFIER	CDH12	CDH12	transcript	XM_019812450.3	protein_coding	2	c.-335+371T>A
chrA1	221229908	C	T	PASS	intron_variant	MODIFIER	CDH12	CDH12	transcript	XM_019812450.3	protein_coding	2	c.-335+79510C>T
chrA1	221330485	C	T	PASS	intron_variant	MODIFIER	CDH12	CDH12	transcript	XM_019812450.3	protein_coding	2	c.-334-102982C>T
chrA1	221378511	G	A	PASS	intron_variant	MODIFIER	CDH12	CDH12	transcript	XM_019812450.3	protein_coding	2	c.-334-54956G>A
chrA1	221530060	C	T	PASS	intron_variant	MODIFIER	CDH12	CDH12	transcript	XM_006928094.4	protein_coding	1	c.-187-27858C>T
chrA1	221835157	TATATATATATATATA	T	PASS	intergenic_region	MODIFIER	CDH12-LOC109492296	CDH12-LOC109492296	intergenic_region	CDH12-LOC109492296		-1	n.221835158_221835172delATATATATATATATA
chrA1	222303885	T	C	PASS	intergenic_region	MODIFIER	LOC111561819-LOC123385434	LOC111561819-LOC123385434	intergenic_region	LOC111561819-LOC123385434		-1	n.222303885T>C
chrA1	222307895	C	A	PASS	intergenic_region	MODIFIER	LOC111561819-LOC123385434	LOC111561819-LOC123385434	intergenic_region	LOC111561819-LOC123385434		-1	n.222307895C>A
chrA1	222409787	G	T	PASS	intergenic_region	MODIFIER	LOC111561819-LOC123385434	LOC111561819-LOC123385434	intergenic_region	LOC111561819-LOC123385434		-1	n.222409787G>T
chrA1	222601275	CA	C	PASS	intergenic_region	MODIFIER	LOC123385434-CDH18	LOC123385434-CDH18	intergenic_region	LOC123385434-CDH18		-1	n.222601276delA
chrA1	222980912	C	T	PASS	intron_variant	MODIFIER	CDH18	CDH18	transcript	XM_019812487.3	protein_coding	2	c.-401+42772C>T
chrA1	223021962	G	A	PASS	intron_variant	MODIFIER	CDH18	CDH18	transcript	XM_019812487.3	protein_coding	2	c.-400-32926G>A
chrA1	223408715	T	C	PASS	intron_variant	MODIFIER	CDH18	CDH18	transcript	XM_019812487.3	protein_coding	4	c.229-1250T>C
chrA1	223758993	G	A	PASS	intergenic_region	MODIFIER	CDH18-LOC101088218	CDH18-LOC101088218	intergenic_region	CDH18-LOC101088218		-1	n.223758993G>A
chrA1	223802073	G	GA	PASS	intergenic_region	MODIFIER	CDH18-LOC101088218	CDH18-LOC101088218	intergenic_region	CDH18-LOC101088218		-1	n.223802073_223802074insA
chrA1	223934365	C	T	PASS	intergenic_region	MODIFIER	LOC101088218-LOC123380439	LOC101088218-LOC123380439	intergenic_region	LOC101088218-LOC123380439		-1	n.223934365C>T
chrA1	223949150	G	A	PASS	intergenic_region	MODIFIER	LOC101088218-LOC123380439	LOC101088218-LOC123380439	intergenic_region	LOC101088218-LOC123380439		-1	n.223949150G>A
chrA1	224048612	T	G	PASS	intergenic_region	MODIFIER	LOC101088218-LOC123380439	LOC101088218-LOC123380439	intergenic_region	LOC101088218-LOC123380439		-1	n.224048612T>G
chrA1	224135373	TTC	T	PASS	intergenic_region	MODIFIER	LOC101088218-LOC123380439	LOC101088218-LOC123380439	intergenic_region	LOC101088218-LOC123380439		-1	n.224135374_224135375delTC
chrA1	224415512	T	C	PASS	intergenic_region	MODIFIER	LOC123380439-LOC111556993	LOC123380439-LOC111556993	intergenic_region	LOC123380439-LOC111556993		-1	n.224415512T>C
chrA1	224418082	G	A	PASS	intergenic_region	MODIFIER	LOC123380439-LOC111556993	LOC123380439-LOC111556993	intergenic_region	LOC123380439-LOC111556993		-1	n.224418082G>A
chrA1	224428946	G	T	PASS	intergenic_region	MODIFIER	LOC123380439-LOC111556993	LOC123380439-LOC111556993	intergenic_region	LOC123380439-LOC111556993		-1	n.224428946G>T
chrA1	224616858	A	T	PASS	intergenic_region	MODIFIER	LOC123380439-LOC111556993	LOC123380439-LOC111556993	intergenic_region	LOC123380439-LOC111556993		-1	n.224616858A>T
chrA1	224735810	AG	A	PASS	intergenic_region	MODIFIER	LOC111556993-LOC111556603	LOC111556993-LOC111556603	intergenic_region	LOC111556993-LOC111556603		-1	n.224735811delG
chrA1	224776744	A	G	PASS	intergenic_region	MODIFIER	LOC111556993-LOC111556603	LOC111556993-LOC111556603	intergenic_region	LOC111556993-LOC111556603		-1	n.224776744A>G
chrA1	224912342	AATT	A	PASS	intergenic_region	MODIFIER	LOC111556993-LOC111556603	LOC111556993-LOC111556603	intergenic_region	LOC111556993-LOC111556603		-1	n.224912343_224912345delATT
chrA1	224912348	G	T	PASS	intergenic_region	MODIFIER	LOC111556993-LOC111556603	LOC111556993-LOC111556603	intergenic_region	LOC111556993-LOC111556603		-1	n.224912348G>T
chrA1	224960391	G	A	PASS	intron_variant	MODIFIER	LOC111556603	LOC111556603	transcript	XR_002736192.2	pseudogene	2	n.553+785C>T
chrA1	225012760	G	A	PASS	intergenic_region	MODIFIER	LOC101088465-LOC123380440	LOC101088465-LOC123380440	intergenic_region	LOC101088465-LOC123380440		-1	n.225012760G>A
chrA1	225297930	T	G	PASS	intron_variant	MODIFIER	BASP1	BASP1	transcript	XM_023239400.2	protein_coding	1	c.-10+2790A>C
chrA1	225355488	T	TC	PASS	intergenic_region	MODIFIER	BASP1-LOC109492177	BASP1-LOC109492177	intergenic_region	BASP1-LOC109492177		-1	n.225355488_225355489insC
chrA1	225385150	CATAAACCCCCAGCTAGA	C	PASS	intergenic_region	MODIFIER	BASP1-LOC109492177	BASP1-LOC109492177	intergenic_region	BASP1-LOC109492177		-1	n.225385151_225385167delATAAACCCCCAGCTAGA
chrA1	225421327	TA	T	PASS	intergenic_region	MODIFIER	BASP1-LOC109492177	BASP1-LOC109492177	intergenic_region	BASP1-LOC109492177		-1	n.225421328delA
chrA1	225532558	TTCTTTC	T	PASS	intron_variant	MODIFIER	MYO10	MYO10	transcript	XM_023239408.2	protein_coding	1	c.22-20118_22-20113delTCTTTC
chrA1	225830566	G	A	PASS	intron_variant	MODIFIER	RETREG1	RETREG1	transcript	XM_023239424.2	protein_coding	3	c.431+31790G>A
chrA1	225947147	G	A	PASS	intergenic_region	MODIFIER	ZNF622-LOC109492397	ZNF622-LOC109492397	intergenic_region	ZNF622-LOC109492397		-1	n.225947147G>A
chrA1	226070518	C	T	PASS	intergenic_region	MODIFIER	ZNF622-LOC109492397	ZNF622-LOC109492397	intergenic_region	ZNF622-LOC109492397		-1	n.226070518C>T
chrA1	226826547	G	A	PASS	intergenic_region	MODIFIER	LOC123385443-LOC123380462	LOC123385443-LOC123380462	intergenic_region	LOC123385443-LOC123380462		-1	n.226826547G>A
chrA1	229556898	C	G	PASS	intergenic_region	MODIFIER	LOC109492223-CTNND2	LOC109492223-CTNND2	intergenic_region	LOC109492223-CTNND2		-1	n.229556898C>G
chrA1	233074752	CTTTTACTAAGTGTTGATTA	C	PASS	intergenic_region	MODIFIER	LOC102899839-LOC123380502	LOC102899839-LOC123380502	intergenic_region	LOC102899839-LOC123380502		-1	n.233074753_233074771delTTTTACTAAGTGTTGATTA
chrA1	233328665	A	C	PASS	intron_variant	MODIFIER	FASTKD3	FASTKD3	transcript	XM_006928112.5	protein_coding	3	c.1525-494A>C
chrA1	233328666	A	C	PASS	intron_variant	MODIFIER	FASTKD3	FASTKD3	transcript	XM_006928112.5	protein_coding	3	c.1525-493A>C
chrA1	233442123	T	C	PASS	intron_variant	MODIFIER	ADCY2	ADCY2	transcript	XM_023239649.2	protein_coding	15	c.1974+1817A>G
chrA1	233603005	G	A	PASS	intron_variant	MODIFIER	ADCY2	ADCY2	transcript	XM_023239649.2	protein_coding	3	c.592-36011C>T
chrA1	233603070	A	C	PASS	intron_variant	MODIFIER	ADCY2	ADCY2	transcript	XM_023239649.2	protein_coding	3	c.592-36076T>G
chrA1	233606861	G	A	PASS	intron_variant	MODIFIER	ADCY2	ADCY2	transcript	XM_023239649.2	protein_coding	3	c.592-39867C>T
chrA1	233611342	C	T	PASS	intron_variant	MODIFIER	ADCY2	ADCY2	transcript	XM_023239649.2	protein_coding	3	c.592-44348G>A
chrA1	233612170	C	T	PASS	intron_variant	MODIFIER	ADCY2	ADCY2	transcript	XM_023239649.2	protein_coding	3	c.592-45176G>A
chrA1	233612550	T	C	PASS	intron_variant	MODIFIER	ADCY2	ADCY2	transcript	XM_023239649.2	protein_coding	3	c.592-45556A>G
chrA1	233612804	G	A	PASS	intron_variant	MODIFIER	ADCY2	ADCY2	transcript	XM_023239649.2	protein_coding	3	c.592-45810C>T
chrA1	233612960	G	A	PASS	intron_variant	MODIFIER	ADCY2	ADCY2	transcript	XM_023239649.2	protein_coding	3	c.592-45966C>T
chrA1	233613136	G	GCGCA	PASS	intron_variant	MODIFIER	ADCY2	ADCY2	transcript	XM_023239649.2	protein_coding	3	c.592-46143_592-46142insTGCG
chrA1	233613322	G	C	PASS	intron_variant	MODIFIER	ADCY2	ADCY2	transcript	XM_023239649.2	protein_coding	3	c.592-46328C>G
chrA1	233613453	C	T	PASS	intron_variant	MODIFIER	ADCY2	ADCY2	transcript	XM_023239649.2	protein_coding	3	c.592-46459G>A
chrA1	233613813	C	T	PASS	intron_variant	MODIFIER	ADCY2	ADCY2	transcript	XM_023239649.2	protein_coding	3	c.592-46819G>A
chrA1	233616216	C	T	PASS	intron_variant	MODIFIER	ADCY2	ADCY2	transcript	XM_023239649.2	protein_coding	3	c.591+44479G>A
chrA1	233617262	G	A	PASS	intron_variant	MODIFIER	ADCY2	ADCY2	transcript	XM_023239649.2	protein_coding	3	c.591+43433C>T
chrA1	233620750	G	A	PASS	intron_variant	MODIFIER	ADCY2	ADCY2	transcript	XM_023239649.2	protein_coding	3	c.591+39945C>T
chrA1	233621951	C	T	PASS	intron_variant	MODIFIER	ADCY2	ADCY2	transcript	XM_023239649.2	protein_coding	3	c.591+38744G>A
chrA1	233622393	C	A	PASS	intron_variant	MODIFIER	ADCY2	ADCY2	transcript	XM_023239649.2	protein_coding	3	c.591+38302G>T
chrA1	233623111	A	G	PASS	intron_variant	MODIFIER	ADCY2	ADCY2	transcript	XM_023239649.2	protein_coding	3	c.591+37584T>C
chrA1	233623891	A	G	PASS	intron_variant	MODIFIER	ADCY2	ADCY2	transcript	XM_023239649.2	protein_coding	3	c.591+36804T>C
chrA1	233625493	A	T	PASS	intron_variant	MODIFIER	ADCY2	ADCY2	transcript	XM_023239649.2	protein_coding	3	c.591+35202T>A
chrA1	233626039	G	A	PASS	intron_variant	MODIFIER	ADCY2	ADCY2	transcript	XM_023239649.2	protein_coding	3	c.591+34656C>T
chrA1	233626240	G	A	PASS	intron_variant	MODIFIER	ADCY2	ADCY2	transcript	XM_023239649.2	protein_coding	3	c.591+34455C>T
chrA1	233626453	G	A	PASS	intron_variant	MODIFIER	ADCY2	ADCY2	transcript	XM_023239649.2	protein_coding	3	c.591+34242C>T
chrA1	233626811	A	AGAGAGAGAGAGAGC	PASS	intron_variant	MODIFIER	ADCY2	ADCY2	transcript	XM_023239649.2	protein_coding	3	c.591+33883_591+33884insGCTCTCTCTCTCTC
chrA1	233628363	G	C	PASS	intron_variant	MODIFIER	ADCY2	ADCY2	transcript	XM_023239649.2	protein_coding	3	c.591+32332C>G
chrA1	233628566	T	C	PASS	intron_variant	MODIFIER	ADCY2	ADCY2	transcript	XM_023239649.2	protein_coding	3	c.591+32129A>G
chrA1	233630122	A	C	PASS	intron_variant	MODIFIER	ADCY2	ADCY2	transcript	XM_023239649.2	protein_coding	3	c.591+30573T>G
chrA1	233631541	G	A	PASS	intron_variant	MODIFIER	ADCY2	ADCY2	transcript	XM_023239649.2	protein_coding	3	c.591+29154C>T
chrA1	233632390	G	A	PASS	intron_variant	MODIFIER	ADCY2	ADCY2	transcript	XM_023239649.2	protein_coding	3	c.591+28305C>T
chrA1	233633986	G	A	PASS	intron_variant	MODIFIER	ADCY2	ADCY2	transcript	XM_023239649.2	protein_coding	3	c.591+26709C>T
chrA1	233636856	C	T	PASS	intron_variant	MODIFIER	ADCY2	ADCY2	transcript	XM_023239649.2	protein_coding	3	c.591+23839G>A
chrA1	233637470	G	A	PASS	intron_variant	MODIFIER	ADCY2	ADCY2	transcript	XM_023239649.2	protein_coding	3	c.591+23225C>T
chrA1	233638109	G	A	PASS	intron_variant	MODIFIER	ADCY2	ADCY2	transcript	XM_023239649.2	protein_coding	3	c.591+22586C>T
chrA1	233638155	C	A	PASS	intron_variant	MODIFIER	ADCY2	ADCY2	transcript	XM_023239649.2	protein_coding	3	c.591+22540G>T
chrA1	233638412	G	C	PASS	intron_variant	MODIFIER	ADCY2	ADCY2	transcript	XM_023239649.2	protein_coding	3	c.591+22283C>G
chrA1	233638417	C	G	PASS	intron_variant	MODIFIER	ADCY2	ADCY2	transcript	XM_023239649.2	protein_coding	3	c.591+22278G>C
chrA1	233638972	T	C	PASS	intron_variant	MODIFIER	ADCY2	ADCY2	transcript	XM_023239649.2	protein_coding	3	c.591+21723A>G
chrA1	233643178	C	T	PASS	intron_variant	MODIFIER	ADCY2	ADCY2	transcript	XM_023239649.2	protein_coding	3	c.591+17517G>A
chrA1	233643848	G	A	PASS	intron_variant	MODIFIER	ADCY2	ADCY2	transcript	XM_023239649.2	protein_coding	3	c.591+16847C>T
chrA1	233643867	C	G	PASS	intron_variant	MODIFIER	ADCY2	ADCY2	transcript	XM_023239649.2	protein_coding	3	c.591+16828G>C
chrA1	233643983	C	T	PASS	intron_variant	MODIFIER	ADCY2	ADCY2	transcript	XM_023239649.2	protein_coding	3	c.591+16712G>A
chrA1	233645628	C	T	PASS	intron_variant	MODIFIER	ADCY2	ADCY2	transcript	XM_023239649.2	protein_coding	3	c.591+15067G>A
chrA1	233654757	T	C	PASS	intron_variant	MODIFIER	ADCY2	ADCY2	transcript	XM_023239649.2	protein_coding	3	c.591+5938A>G
chrA1	233656107	C	T	PASS	intron_variant	MODIFIER	ADCY2	ADCY2	transcript	XM_023239649.2	protein_coding	3	c.591+4588G>A
chrA1	233659758	G	A	PASS	intron_variant	MODIFIER	ADCY2	ADCY2	transcript	XM_023239649.2	protein_coding	3	c.591+937C>T
chrA1	233668039	G	A	PASS	intron_variant	MODIFIER	ADCY2	ADCY2	transcript	XM_023239649.2	protein_coding	2	c.430-7183C>T
chrA1	233670218	T	C	PASS	intron_variant	MODIFIER	ADCY2	ADCY2	transcript	XM_023239649.2	protein_coding	2	c.430-9362A>G
chrA1	233670237	AAGCAC	A	PASS	intron_variant	MODIFIER	ADCY2	ADCY2	transcript	XM_023239649.2	protein_coding	2	c.430-9386_430-9382delGTGCT
chrA1	233670426	G	A	PASS	intron_variant	MODIFIER	ADCY2	ADCY2	transcript	XM_023239649.2	protein_coding	2	c.430-9570C>T
chrA1	233672252	C	T	PASS	intron_variant	MODIFIER	ADCY2	ADCY2	transcript	XM_023239649.2	protein_coding	2	c.430-11396G>A
chrA1	233672634	A	AC	PASS	intron_variant	MODIFIER	ADCY2	ADCY2	transcript	XM_023239649.2	protein_coding	2	c.430-11779_430-11778insG
chrA1	233673348	GA	G	PASS	intron_variant	MODIFIER	ADCY2	ADCY2	transcript	XM_023239649.2	protein_coding	2	c.430-12493delT
chrA1	233675467	A	T	PASS	intron_variant	MODIFIER	ADCY2	ADCY2	transcript	XM_023239649.2	protein_coding	2	c.430-14611T>A
chrA1	233675532	G	GA	PASS	intron_variant	MODIFIER	ADCY2	ADCY2	transcript	XM_023239649.2	protein_coding	2	c.430-14677_430-14676insT
chrA1	233676376	C	CT	PASS	intron_variant	MODIFIER	ADCY2	ADCY2	transcript	XM_023239649.2	protein_coding	2	c.430-15521_430-15520insA
chrA1	233676985	G	A	PASS	intron_variant	MODIFIER	ADCY2	ADCY2	transcript	XM_023239649.2	protein_coding	2	c.430-16129C>T
chrA1	233677678	C	T	PASS	intron_variant	MODIFIER	ADCY2	ADCY2	transcript	XM_023239649.2	protein_coding	2	c.430-16822G>A
chrA1	233677913	G	C	PASS	intron_variant	MODIFIER	ADCY2	ADCY2	transcript	XM_023239649.2	protein_coding	2	c.430-17057C>G
chrA1	233678342	G	T	PASS	intron_variant	MODIFIER	ADCY2	ADCY2	transcript	XM_023239649.2	protein_coding	2	c.430-17486C>A
chrA1	233678440	T	C	PASS	intron_variant	MODIFIER	ADCY2	ADCY2	transcript	XM_023239649.2	protein_coding	2	c.430-17584A>G
chrA1	233678493	G	A	PASS	intron_variant	MODIFIER	ADCY2	ADCY2	transcript	XM_023239649.2	protein_coding	2	c.430-17637C>T
chrA1	233678756	A	G	PASS	intron_variant	MODIFIER	ADCY2	ADCY2	transcript	XM_023239649.2	protein_coding	2	c.430-17900T>C
chrA1	233678827	G	A	PASS	intron_variant	MODIFIER	ADCY2	ADCY2	transcript	XM_023239649.2	protein_coding	2	c.430-17971C>T
chrA1	233678871	G	A	PASS	intron_variant	MODIFIER	ADCY2	ADCY2	transcript	XM_023239649.2	protein_coding	2	c.430-18015C>T
chrA1	233679771	C	T	PASS	intron_variant	MODIFIER	ADCY2	ADCY2	transcript	XM_023239649.2	protein_coding	2	c.430-18915G>A
chrA1	233680014	T	C	PASS	intron_variant	MODIFIER	ADCY2	ADCY2	transcript	XM_023239649.2	protein_coding	2	c.430-19158A>G
chrA1	233682042	G	T	PASS	intron_variant	MODIFIER	ADCY2	ADCY2	transcript	XM_023239649.2	protein_coding	2	c.430-21186C>A
chrA1	233684613	T	C	PASS	intron_variant	MODIFIER	ADCY2	ADCY2	transcript	XM_023239649.2	protein_coding	2	c.430-23757A>G
chrA1	233685565	AG	A	PASS	intron_variant	MODIFIER	ADCY2	ADCY2	transcript	XM_023239649.2	protein_coding	2	c.430-24710delC
chrA1	233687236	T	A	PASS	intron_variant	MODIFIER	ADCY2	ADCY2	transcript	XM_023239649.2	protein_coding	2	c.430-26380A>T
chrA1	233687644	G	A	PASS	intron_variant	MODIFIER	ADCY2	ADCY2	transcript	XM_023239649.2	protein_coding	2	c.430-26788C>T
chrA1	233688433	G	A	PASS	intron_variant	MODIFIER	ADCY2	ADCY2	transcript	XM_023239649.2	protein_coding	2	c.430-27577C>T
chrA1	233690468	T	C	PASS	intron_variant	MODIFIER	ADCY2	ADCY2	transcript	XM_023239649.2	protein_coding	2	c.430-29612A>G
chrA1	233690586	G	T	PASS	intron_variant	MODIFIER	ADCY2	ADCY2	transcript	XM_023239649.2	protein_coding	2	c.430-29730C>A
chrA1	233690592	C	A	PASS	intron_variant	MODIFIER	ADCY2	ADCY2	transcript	XM_023239649.2	protein_coding	2	c.430-29736G>T
chrA1	233690605	C	T	PASS	intron_variant	MODIFIER	ADCY2	ADCY2	transcript	XM_023239649.2	protein_coding	2	c.430-29749G>A
chrA1	233690615	G	A	PASS	intron_variant	MODIFIER	ADCY2	ADCY2	transcript	XM_023239649.2	protein_coding	2	c.430-29759C>T
chrA1	233690685	AGAGC	A	PASS	intron_variant	MODIFIER	ADCY2	ADCY2	transcript	XM_023239649.2	protein_coding	2	c.430-29833_430-29830delGCTC
chrA1	233692732	C	T	PASS	intron_variant	MODIFIER	ADCY2	ADCY2	transcript	XM_023239649.2	protein_coding	2	c.430-31876G>A
chrA1	233693471	C	CT	PASS	intron_variant	MODIFIER	ADCY2	ADCY2	transcript	XM_023239649.2	protein_coding	2	c.430-32616_430-32615insA
chrA1	233697526	C	T	PASS	intron_variant	MODIFIER	ADCY2	ADCY2	transcript	XM_023239649.2	protein_coding	2	c.430-36670G>A
chrA1	233698175	G	A	PASS	intron_variant	MODIFIER	ADCY2	ADCY2	transcript	XM_023239649.2	protein_coding	2	c.430-37319C>T
chrA1	233699262	T	C	PASS	intron_variant	MODIFIER	ADCY2	ADCY2	transcript	XM_023239649.2	protein_coding	2	c.430-38406A>G
chrA1	233700621	A	G	PASS	intron_variant	MODIFIER	ADCY2	ADCY2	transcript	XM_023239649.2	protein_coding	2	c.430-39765T>C
chrA1	233703428	T	A	PASS	intron_variant	MODIFIER	ADCY2	ADCY2	transcript	XM_023239649.2	protein_coding	2	c.430-42572A>T
chrA1	233706753	A	C	PASS	intron_variant	MODIFIER	ADCY2	ADCY2	transcript	XM_023239649.2	protein_coding	2	c.430-45897T>G
chrA1	233707642	G	A	PASS	intron_variant	MODIFIER	ADCY2	ADCY2	transcript	XM_023239649.2	protein_coding	2	c.429+46201C>T
chrA1	233709719	G	C	PASS	intron_variant	MODIFIER	ADCY2	ADCY2	transcript	XM_023239649.2	protein_coding	2	c.429+44124C>G
chrA1	233710930	C	T	PASS	intron_variant	MODIFIER	ADCY2	ADCY2	transcript	XM_023239649.2	protein_coding	2	c.429+42913G>A
chrA1	233713769	C	T	PASS	intron_variant	MODIFIER	ADCY2	ADCY2	transcript	XM_023239649.2	protein_coding	2	c.429+40074G>A
chrA1	233715777	C	G	PASS	intron_variant	MODIFIER	ADCY2	ADCY2	transcript	XM_023239649.2	protein_coding	2	c.429+38066G>C
chrA1	233717903	A	G	PASS	intron_variant	MODIFIER	ADCY2	ADCY2	transcript	XM_023239649.2	protein_coding	2	c.429+35940T>C
chrA1	233719980	G	A	PASS	intron_variant	MODIFIER	ADCY2	ADCY2	transcript	XM_023239649.2	protein_coding	2	c.429+33863C>T
chrA1	233727044	GGTGGCTCAGTCAGTTAA	G	PASS	intron_variant	MODIFIER	ADCY2	ADCY2	transcript	XM_023239649.2	protein_coding	2	c.429+26782_429+26798delTTAACTGACTGAGCCAC
chrA1	233727668	G	A	PASS	intron_variant	MODIFIER	ADCY2	ADCY2	transcript	XM_023239649.2	protein_coding	2	c.429+26175C>T
chrA1	233727994	G	A	PASS	intron_variant	MODIFIER	ADCY2	ADCY2	transcript	XM_023239649.2	protein_coding	2	c.429+25849C>T
chrA1	233728465	TG	T	PASS	intron_variant	MODIFIER	ADCY2	ADCY2	transcript	XM_023239649.2	protein_coding	2	c.429+25377delC
chrA1	233731212	G	A	PASS	intron_variant	MODIFIER	ADCY2	ADCY2	transcript	XM_023239649.2	protein_coding	2	c.429+22631C>T
chrA1	233732938	G	A	PASS	intron_variant	MODIFIER	ADCY2	ADCY2	transcript	XM_023239649.2	protein_coding	2	c.429+20905C>T
chrA1	233733918	G	A	PASS	intron_variant	MODIFIER	ADCY2	ADCY2	transcript	XM_023239649.2	protein_coding	2	c.429+19925C>T
chrA1	233736197	C	T	PASS	intron_variant	MODIFIER	ADCY2	ADCY2	transcript	XM_023239649.2	protein_coding	2	c.429+17646G>A
chrA1	233736240	G	C	PASS	intron_variant	MODIFIER	ADCY2	ADCY2	transcript	XM_023239649.2	protein_coding	2	c.429+17603C>G
chrA1	233736611	C	T	PASS	intron_variant	MODIFIER	ADCY2	ADCY2	transcript	XM_023239649.2	protein_coding	2	c.429+17232G>A
chrA1	233736622	G	A	PASS	intron_variant	MODIFIER	ADCY2	ADCY2	transcript	XM_023239649.2	protein_coding	2	c.429+17221C>T
chrA1	233739620	G	A	PASS	intron_variant	MODIFIER	ADCY2	ADCY2	transcript	XM_023239649.2	protein_coding	2	c.429+14223C>T
chrA1	233742175	C	T	PASS	intron_variant	MODIFIER	ADCY2	ADCY2	transcript	XM_023239649.2	protein_coding	2	c.429+11668G>A
chrA1	233742967	T	C	PASS	intron_variant	MODIFIER	ADCY2	ADCY2	transcript	XM_023239649.2	protein_coding	2	c.429+10876A>G
chrA1	233743099	G	A	PASS	intron_variant	MODIFIER	ADCY2	ADCY2	transcript	XM_023239649.2	protein_coding	2	c.429+10744C>T
chrA1	233743275	A	G	PASS	intron_variant	MODIFIER	ADCY2	ADCY2	transcript	XM_023239649.2	protein_coding	2	c.429+10568T>C
chrA1	233743570	C	T	PASS	intron_variant	MODIFIER	ADCY2	ADCY2	transcript	XM_023239649.2	protein_coding	2	c.429+10273G>A
chrA1	233744074	A	C	PASS	intron_variant	MODIFIER	ADCY2	ADCY2	transcript	XM_023239649.2	protein_coding	2	c.429+9769T>G
chrA1	233744445	G	A	PASS	intron_variant	MODIFIER	ADCY2	ADCY2	transcript	XM_023239649.2	protein_coding	2	c.429+9398C>T
chrA1	233745052	A	G	PASS	intron_variant	MODIFIER	ADCY2	ADCY2	transcript	XM_023239649.2	protein_coding	2	c.429+8791T>C
chrA1	233745072	GTA	G	PASS	intron_variant	MODIFIER	ADCY2	ADCY2	transcript	XM_023239649.2	protein_coding	2	c.429+8769_429+8770delTA
chrA1	233745626	G	A	PASS	intron_variant	MODIFIER	ADCY2	ADCY2	transcript	XM_023239649.2	protein_coding	2	c.429+8217C>T
chrA1	233745630	G	A	PASS	intron_variant	MODIFIER	ADCY2	ADCY2	transcript	XM_023239649.2	protein_coding	2	c.429+8213C>T
chrA1	233746269	C	G	PASS	intron_variant	MODIFIER	ADCY2	ADCY2	transcript	XM_023239649.2	protein_coding	2	c.429+7574G>C
chrA1	233746324	T	C	PASS	intron_variant	MODIFIER	ADCY2	ADCY2	transcript	XM_023239649.2	protein_coding	2	c.429+7519A>G
chrA1	233746433	G	A	PASS	intron_variant	MODIFIER	ADCY2	ADCY2	transcript	XM_023239649.2	protein_coding	2	c.429+7410C>T
chrA1	233748830	T	C	PASS	intron_variant	MODIFIER	ADCY2	ADCY2	transcript	XM_023239649.2	protein_coding	2	c.429+5013A>G
chrA1	233763963	C	T	PASS	intron_variant	MODIFIER	ADCY2	ADCY2	transcript	XM_023239649.2	protein_coding	1	c.232-9923G>A
chrA1	233773648	C	T	PASS	intron_variant	MODIFIER	ADCY2	ADCY2	transcript	XM_023239649.2	protein_coding	1	c.231+2805G>A
chrA1	233775813	C	T	PASS	intron_variant	MODIFIER	ADCY2	ADCY2	transcript	XM_023239649.2	protein_coding	1	c.231+640G>A
chrA1	233776346	C	T	PASS	intron_variant	MODIFIER	ADCY2	ADCY2	transcript	XM_023239649.2	protein_coding	1	c.231+107G>A
chrA1	233777290	C	CCCA	PASS	upstream_gene_variant	MODIFIER	ADCY2	ADCY2	transcript	XM_023239649.2	protein_coding	-1	c.-608_-607insTGG
chrA1	233779851	A	AT	PASS	upstream_gene_variant	MODIFIER	ADCY2	ADCY2	transcript	XM_023239649.2	protein_coding	-1	c.-3169_-3168insA
chrA1	233782112	G	T	PASS	intergenic_region	MODIFIER	ADCY2-LOC123380526	ADCY2-LOC123380526	intergenic_region	ADCY2-LOC123380526		-1	n.233782112G>T
chrA1	233782391	A	G	PASS	intergenic_region	MODIFIER	ADCY2-LOC123380526	ADCY2-LOC123380526	intergenic_region	ADCY2-LOC123380526		-1	n.233782391A>G
chrA1	233782435	A	G	PASS	intergenic_region	MODIFIER	ADCY2-LOC123380526	ADCY2-LOC123380526	intergenic_region	ADCY2-LOC123380526		-1	n.233782435A>G
chrA1	233783787	G	T	PASS	intergenic_region	MODIFIER	ADCY2-LOC123380526	ADCY2-LOC123380526	intergenic_region	ADCY2-LOC123380526		-1	n.233783787G>T
chrA1	233784832	T	TC	PASS	intergenic_region	MODIFIER	ADCY2-LOC123380526	ADCY2-LOC123380526	intergenic_region	ADCY2-LOC123380526		-1	n.233784832_233784833insC
chrA1	233785729	T	C	PASS	intergenic_region	MODIFIER	ADCY2-LOC123380526	ADCY2-LOC123380526	intergenic_region	ADCY2-LOC123380526		-1	n.233785729T>C
chrA1	233787194	C	T	PASS	intergenic_region	MODIFIER	ADCY2-LOC123380526	ADCY2-LOC123380526	intergenic_region	ADCY2-LOC123380526		-1	n.233787194C>T
chrA1	233788358	A	T	PASS	intergenic_region	MODIFIER	ADCY2-LOC123380526	ADCY2-LOC123380526	intergenic_region	ADCY2-LOC123380526		-1	n.233788358A>T
chrA1	233790117	GAGTTGGAAATCTGTTCCATA	G	PASS	intergenic_region	MODIFIER	ADCY2-LOC123380526	ADCY2-LOC123380526	intergenic_region	ADCY2-LOC123380526		-1	n.233790118_233790137delAGTTGGAAATCTGTTCCATA
chrA1	233810782	G	A	PASS	intron_variant	MODIFIER	LOC123380526	LOC123380526	transcript	XR_006586423.1	pseudogene	1	n.774-7813C>T
chrA1	233811711	A	G	PASS	intron_variant	MODIFIER	LOC123380526	LOC123380526	transcript	XR_006586423.1	pseudogene	1	n.774-8742T>C
chrA1	233812295	A	T	PASS	intron_variant	MODIFIER	LOC123380526	LOC123380526	transcript	XR_006586423.1	pseudogene	1	n.774-9326T>A
chrA1	233812362	T	C	PASS	intron_variant	MODIFIER	LOC123380526	LOC123380526	transcript	XR_006586423.1	pseudogene	1	n.774-9393A>G
chrA1	233814492	G	A	PASS	intron_variant	MODIFIER	LOC123380526	LOC123380526	transcript	XR_006586423.1	pseudogene	1	n.774-11523C>T
chrA1	233814949	G	A	PASS	intron_variant	MODIFIER	LOC123380526	LOC123380526	transcript	XR_006586423.1	pseudogene	1	n.774-11980C>T
chrA1	233814962	G	A	PASS	intron_variant	MODIFIER	LOC123380526	LOC123380526	transcript	XR_006586423.1	pseudogene	1	n.774-11993C>T
chrA1	233815635	G	C	PASS	intron_variant	MODIFIER	LOC123380526	LOC123380526	transcript	XR_006586423.1	pseudogene	1	n.774-12666C>G
chrA1	233815792	C	T	PASS	intron_variant	MODIFIER	LOC123380526	LOC123380526	transcript	XR_006586423.1	pseudogene	1	n.774-12823G>A
chrA1	233815806	G	A	PASS	intron_variant	MODIFIER	LOC123380526	LOC123380526	transcript	XR_006586423.1	pseudogene	1	n.774-12837C>T
chrA1	233817554	C	T	PASS	intron_variant	MODIFIER	LOC123380526	LOC123380526	transcript	XR_006586423.1	pseudogene	1	n.773+13048G>A
chrA1	233817577	C	T	PASS	intron_variant	MODIFIER	LOC123380526	LOC123380526	transcript	XR_006586423.1	pseudogene	1	n.773+13025G>A
chrA1	233817580	T	G	PASS	intron_variant	MODIFIER	LOC123380526	LOC123380526	transcript	XR_006586423.1	pseudogene	1	n.773+13022A>C
chrA1	233817894	C	A	PASS	intron_variant	MODIFIER	LOC123380526	LOC123380526	transcript	XR_006586423.1	pseudogene	1	n.773+12708G>T
chrA1	233820073	C	T	PASS	intron_variant	MODIFIER	LOC123380526	LOC123380526	transcript	XR_006586423.1	pseudogene	1	n.773+10529G>A
chrA1	233824327	CAAGAAGGA	C	PASS	intron_variant	MODIFIER	LOC123380526	LOC123380526	transcript	XR_006586423.1	pseudogene	1	n.773+6267_773+6274delTCCTTCTT
chrA1	233824436	T	G	PASS	intron_variant	MODIFIER	LOC123380526	LOC123380526	transcript	XR_006586423.1	pseudogene	1	n.773+6166A>C
chrA1	233825149	T	C	PASS	intron_variant	MODIFIER	LOC123380526	LOC123380526	transcript	XR_006586423.1	pseudogene	1	n.773+5453A>G
chrA1	233828748	G	A	PASS	intron_variant	MODIFIER	LOC123380526	LOC123380526	transcript	XR_006586423.1	pseudogene	1	n.773+1854C>T
chrA1	233830610	TACTC	T	PASS	non_coding_transcript_exon_variant	MODIFIER	LOC123380526	LOC123380526	transcript	XR_006586423.1	pseudogene	1	n.761_764delGAGT
chrA1	233831155	T	C	PASS	non_coding_transcript_exon_variant	MODIFIER	LOC123380526	LOC123380526	transcript	XR_006586423.1	pseudogene	1	n.220A>G
chrA1	233832640	A	G	PASS	upstream_gene_variant	MODIFIER	LOC123380526	LOC123380526	transcript	XR_006586423.1	pseudogene	-1	n.-1266T>C
chrA1	233833085	G	A	PASS	upstream_gene_variant	MODIFIER	LOC123380526	LOC123380526	transcript	XR_006586423.1	pseudogene	-1	n.-1711C>T
chrA1	233834067	G	T	PASS	upstream_gene_variant	MODIFIER	LOC123380526	LOC123380526	transcript	XR_006586423.1	pseudogene	-1	n.-2693C>A
chrA1	233835560	G	A	PASS	upstream_gene_variant	MODIFIER	LOC123380526	LOC123380526	transcript	XR_006586423.1	pseudogene	-1	n.-4186C>T
chrA1	233835722	T	C	PASS	upstream_gene_variant	MODIFIER	LOC123380526	LOC123380526	transcript	XR_006586423.1	pseudogene	-1	n.-4348A>G
chrA1	233836476	G	C	PASS	intergenic_region	MODIFIER	LOC123380526-LOC111556638	LOC123380526-LOC111556638	intergenic_region	LOC123380526-LOC111556638		-1	n.233836476G>C
chrA1	233836603	T	C	PASS	intergenic_region	MODIFIER	LOC123380526-LOC111556638	LOC123380526-LOC111556638	intergenic_region	LOC123380526-LOC111556638		-1	n.233836603T>C
chrA1	233837386	CGGGGGA	C	PASS	intergenic_region	MODIFIER	LOC123380526-LOC111556638	LOC123380526-LOC111556638	intergenic_region	LOC123380526-LOC111556638		-1	n.233837387_233837392delGGGGGA
chrA1	233837398	A	G	PASS	intergenic_region	MODIFIER	LOC123380526-LOC111556638	LOC123380526-LOC111556638	intergenic_region	LOC123380526-LOC111556638		-1	n.233837398A>G
chrA1	233837417	G	T	PASS	intergenic_region	MODIFIER	LOC123380526-LOC111556638	LOC123380526-LOC111556638	intergenic_region	LOC123380526-LOC111556638		-1	n.233837417G>T
chrA1	233838694	G	A	PASS	intergenic_region	MODIFIER	LOC123380526-LOC111556638	LOC123380526-LOC111556638	intergenic_region	LOC123380526-LOC111556638		-1	n.233838694G>A
chrA1	233839164	T	C	PASS	intergenic_region	MODIFIER	LOC123380526-LOC111556638	LOC123380526-LOC111556638	intergenic_region	LOC123380526-LOC111556638		-1	n.233839164T>C
chrA1	233840890	C	T	PASS	intergenic_region	MODIFIER	LOC123380526-LOC111556638	LOC123380526-LOC111556638	intergenic_region	LOC123380526-LOC111556638		-1	n.233840890C>T
chrA1	233845003	C	T	PASS	intergenic_region	MODIFIER	LOC123380526-LOC111556638	LOC123380526-LOC111556638	intergenic_region	LOC123380526-LOC111556638		-1	n.233845003C>T
chrA1	233847007	C	T	PASS	intergenic_region	MODIFIER	LOC123380526-LOC111556638	LOC123380526-LOC111556638	intergenic_region	LOC123380526-LOC111556638		-1	n.233847007C>T
chrA1	233847812	C	G	PASS	intergenic_region	MODIFIER	LOC123380526-LOC111556638	LOC123380526-LOC111556638	intergenic_region	LOC123380526-LOC111556638		-1	n.233847812C>G
chrA1	233849030	G	A	PASS	intergenic_region	MODIFIER	LOC123380526-LOC111556638	LOC123380526-LOC111556638	intergenic_region	LOC123380526-LOC111556638		-1	n.233849030G>A
chrA1	233849668	T	A	PASS	intergenic_region	MODIFIER	LOC123380526-LOC111556638	LOC123380526-LOC111556638	intergenic_region	LOC123380526-LOC111556638		-1	n.233849668T>A
chrA1	233853448	T	A	PASS	intergenic_region	MODIFIER	LOC123380526-LOC111556638	LOC123380526-LOC111556638	intergenic_region	LOC123380526-LOC111556638		-1	n.233853448T>A
chrA1	233853495	G	T	PASS	intergenic_region	MODIFIER	LOC123380526-LOC111556638	LOC123380526-LOC111556638	intergenic_region	LOC123380526-LOC111556638		-1	n.233853495G>T
chrA1	233853722	C	T	PASS	intergenic_region	MODIFIER	LOC123380526-LOC111556638	LOC123380526-LOC111556638	intergenic_region	LOC123380526-LOC111556638		-1	n.233853722C>T
chrA1	233853743	T	C	PASS	intergenic_region	MODIFIER	LOC123380526-LOC111556638	LOC123380526-LOC111556638	intergenic_region	LOC123380526-LOC111556638		-1	n.233853743T>C
chrA1	233854385	C	T	PASS	intergenic_region	MODIFIER	LOC123380526-LOC111556638	LOC123380526-LOC111556638	intergenic_region	LOC123380526-LOC111556638		-1	n.233854385C>T
chrA1	233854567	C	T	PASS	intergenic_region	MODIFIER	LOC123380526-LOC111556638	LOC123380526-LOC111556638	intergenic_region	LOC123380526-LOC111556638		-1	n.233854567C>T
chrA1	233856536	T	C	PASS	intergenic_region	MODIFIER	LOC123380526-LOC111556638	LOC123380526-LOC111556638	intergenic_region	LOC123380526-LOC111556638		-1	n.233856536T>C
chrA1	233862348	C	T	PASS	intergenic_region	MODIFIER	LOC123380526-LOC111556638	LOC123380526-LOC111556638	intergenic_region	LOC123380526-LOC111556638		-1	n.233862348C>T
chrA1	233863026	TATATA	T	PASS	intergenic_region	MODIFIER	LOC123380526-LOC111556638	LOC123380526-LOC111556638	intergenic_region	LOC123380526-LOC111556638		-1	n.233863027_233863031delATATA
chrA1	233865400	C	G	PASS	intergenic_region	MODIFIER	LOC123380526-LOC111556638	LOC123380526-LOC111556638	intergenic_region	LOC123380526-LOC111556638		-1	n.233865400C>G
chrA1	233865906	C	T	PASS	intergenic_region	MODIFIER	LOC123380526-LOC111556638	LOC123380526-LOC111556638	intergenic_region	LOC123380526-LOC111556638		-1	n.233865906C>T
chrA1	233866141	C	T	PASS	intergenic_region	MODIFIER	LOC123380526-LOC111556638	LOC123380526-LOC111556638	intergenic_region	LOC123380526-LOC111556638		-1	n.233866141C>T
chrA1	233867989	T	C	PASS	intergenic_region	MODIFIER	LOC123380526-LOC111556638	LOC123380526-LOC111556638	intergenic_region	LOC123380526-LOC111556638		-1	n.233867989T>C
chrA1	233868335	C	T	PASS	intergenic_region	MODIFIER	LOC123380526-LOC111556638	LOC123380526-LOC111556638	intergenic_region	LOC123380526-LOC111556638		-1	n.233868335C>T
chrA1	233869929	T	C	PASS	intergenic_region	MODIFIER	LOC123380526-LOC111556638	LOC123380526-LOC111556638	intergenic_region	LOC123380526-LOC111556638		-1	n.233869929T>C
chrA1	233870618	A	C	PASS	intergenic_region	MODIFIER	LOC123380526-LOC111556638	LOC123380526-LOC111556638	intergenic_region	LOC123380526-LOC111556638		-1	n.233870618A>C
chrA1	233871671	C	T	PASS	intergenic_region	MODIFIER	LOC123380526-LOC111556638	LOC123380526-LOC111556638	intergenic_region	LOC123380526-LOC111556638		-1	n.233871671C>T
chrA1	233871712	C	T	PASS	intergenic_region	MODIFIER	LOC123380526-LOC111556638	LOC123380526-LOC111556638	intergenic_region	LOC123380526-LOC111556638		-1	n.233871712C>T
chrA1	233872503	G	A	PASS	intergenic_region	MODIFIER	LOC123380526-LOC111556638	LOC123380526-LOC111556638	intergenic_region	LOC123380526-LOC111556638		-1	n.233872503G>A
chrA1	233875557	G	A	PASS	intergenic_region	MODIFIER	LOC123380526-LOC111556638	LOC123380526-LOC111556638	intergenic_region	LOC123380526-LOC111556638		-1	n.233875557G>A
chrA1	233876061	C	T	PASS	intergenic_region	MODIFIER	LOC123380526-LOC111556638	LOC123380526-LOC111556638	intergenic_region	LOC123380526-LOC111556638		-1	n.233876061C>T
chrA1	233876145	C	T	PASS	intergenic_region	MODIFIER	LOC123380526-LOC111556638	LOC123380526-LOC111556638	intergenic_region	LOC123380526-LOC111556638		-1	n.233876145C>T
chrA1	233876331	C	T	PASS	intergenic_region	MODIFIER	LOC123380526-LOC111556638	LOC123380526-LOC111556638	intergenic_region	LOC123380526-LOC111556638		-1	n.233876331C>T
chrA1	233876741	TTTTG	T	PASS	intergenic_region	MODIFIER	LOC123380526-LOC111556638	LOC123380526-LOC111556638	intergenic_region	LOC123380526-LOC111556638		-1	n.233876742_233876745delTTTG
chrA1	233876945	A	C	PASS	intergenic_region	MODIFIER	LOC123380526-LOC111556638	LOC123380526-LOC111556638	intergenic_region	LOC123380526-LOC111556638		-1	n.233876945A>C
chrA1	233877616	A	C	PASS	intergenic_region	MODIFIER	LOC123380526-LOC111556638	LOC123380526-LOC111556638	intergenic_region	LOC123380526-LOC111556638		-1	n.233877616A>C
chrA1	233884335	GTTGT	G	PASS	intergenic_region	MODIFIER	LOC123380526-LOC111556638	LOC123380526-LOC111556638	intergenic_region	LOC123380526-LOC111556638		-1	n.233884336_233884339delTTGT
chrA1	233885271	G	A	PASS	intergenic_region	MODIFIER	LOC123380526-LOC111556638	LOC123380526-LOC111556638	intergenic_region	LOC123380526-LOC111556638		-1	n.233885271G>A
chrA1	233885949	ATATTT	A	PASS	intergenic_region	MODIFIER	LOC123380526-LOC111556638	LOC123380526-LOC111556638	intergenic_region	LOC123380526-LOC111556638		-1	n.233885950_233885954delTATTT
chrA1	233886624	G	A	PASS	intergenic_region	MODIFIER	LOC123380526-LOC111556638	LOC123380526-LOC111556638	intergenic_region	LOC123380526-LOC111556638		-1	n.233886624G>A
chrA1	233886685	C	T	PASS	intergenic_region	MODIFIER	LOC123380526-LOC111556638	LOC123380526-LOC111556638	intergenic_region	LOC123380526-LOC111556638		-1	n.233886685C>T
chrA1	233888268	G	C	PASS	intergenic_region	MODIFIER	LOC123380526-LOC111556638	LOC123380526-LOC111556638	intergenic_region	LOC123380526-LOC111556638		-1	n.233888268G>C
chrA1	233889445	A	AG	PASS	intergenic_region	MODIFIER	LOC123380526-LOC111556638	LOC123380526-LOC111556638	intergenic_region	LOC123380526-LOC111556638		-1	n.233889445_233889446insG
chrA1	233889527	C	G	PASS	intergenic_region	MODIFIER	LOC123380526-LOC111556638	LOC123380526-LOC111556638	intergenic_region	LOC123380526-LOC111556638		-1	n.233889527C>G
chrA1	233890437	A	T	PASS	intergenic_region	MODIFIER	LOC123380526-LOC111556638	LOC123380526-LOC111556638	intergenic_region	LOC123380526-LOC111556638		-1	n.233890437A>T
chrA1	233891730	C	G	PASS	intergenic_region	MODIFIER	LOC123380526-LOC111556638	LOC123380526-LOC111556638	intergenic_region	LOC123380526-LOC111556638		-1	n.233891730C>G
chrA1	233891838	G	A	PASS	intergenic_region	MODIFIER	LOC123380526-LOC111556638	LOC123380526-LOC111556638	intergenic_region	LOC123380526-LOC111556638		-1	n.233891838G>A
chrA1	233892143	A	G	PASS	intergenic_region	MODIFIER	LOC123380526-LOC111556638	LOC123380526-LOC111556638	intergenic_region	LOC123380526-LOC111556638		-1	n.233892143A>G
chrA1	233892313	A	C	PASS	intergenic_region	MODIFIER	LOC123380526-LOC111556638	LOC123380526-LOC111556638	intergenic_region	LOC123380526-LOC111556638		-1	n.233892313A>C
chrA1	233895929	C	T	PASS	intergenic_region	MODIFIER	LOC123380526-LOC111556638	LOC123380526-LOC111556638	intergenic_region	LOC123380526-LOC111556638		-1	n.233895929C>T
chrA1	233897489	C	CT	PASS	intergenic_region	MODIFIER	LOC123380526-LOC111556638	LOC123380526-LOC111556638	intergenic_region	LOC123380526-LOC111556638		-1	n.233897489_233897490insT
chrA1	233898358	T	G	PASS	intergenic_region	MODIFIER	LOC123380526-LOC111556638	LOC123380526-LOC111556638	intergenic_region	LOC123380526-LOC111556638		-1	n.233898358T>G
chrA1	233903073	C	T	PASS	intergenic_region	MODIFIER	LOC123380526-LOC111556638	LOC123380526-LOC111556638	intergenic_region	LOC123380526-LOC111556638		-1	n.233903073C>T
chrA1	233903768	T	C	PASS	intergenic_region	MODIFIER	LOC123380526-LOC111556638	LOC123380526-LOC111556638	intergenic_region	LOC123380526-LOC111556638		-1	n.233903768T>C
chrA1	233905522	C	T	PASS	intergenic_region	MODIFIER	LOC123380526-LOC111556638	LOC123380526-LOC111556638	intergenic_region	LOC123380526-LOC111556638		-1	n.233905522C>T
chrA1	233906389	G	A	PASS	intergenic_region	MODIFIER	LOC123380526-LOC111556638	LOC123380526-LOC111556638	intergenic_region	LOC123380526-LOC111556638		-1	n.233906389G>A
chrA1	233939459	G	A	PASS	intergenic_region	MODIFIER	LOC123380526-LOC111556638	LOC123380526-LOC111556638	intergenic_region	LOC123380526-LOC111556638		-1	n.233939459G>A
chrA1	234013466	C	T	PASS	intergenic_region	MODIFIER	LOC111556638-LOC111561866	LOC111556638-LOC111561866	intergenic_region	LOC111556638-LOC111561866		-1	n.234013466C>T
chrA1	234014884	C	A	PASS	intergenic_region	MODIFIER	LOC111556638-LOC111561866	LOC111556638-LOC111561866	intergenic_region	LOC111556638-LOC111561866		-1	n.234014884C>A
chrA1	234029425	C	T	PASS	intergenic_region	MODIFIER	LOC111556638-LOC111561866	LOC111556638-LOC111561866	intergenic_region	LOC111556638-LOC111561866		-1	n.234029425C>T
chrA1	234032300	C	T	PASS	intergenic_region	MODIFIER	LOC111556638-LOC111561866	LOC111556638-LOC111561866	intergenic_region	LOC111556638-LOC111561866		-1	n.234032300C>T
chrA1	234034151	C	T	PASS	intergenic_region	MODIFIER	LOC111556638-LOC111561866	LOC111556638-LOC111561866	intergenic_region	LOC111556638-LOC111561866		-1	n.234034151C>T
chrA1	234197612	A	C	PASS	intron_variant	MODIFIER	LOC123380528	LOC123380528	transcript	XR_006586427.1	pseudogene	2	n.881-20596T>G
chrA1	234200843	A	G	PASS	intron_variant	MODIFIER	LOC123380528	LOC123380528	transcript	XR_006586427.1	pseudogene	2	n.881-23827T>C
chrA1	234203122	C	T	PASS	intron_variant	MODIFIER	LOC123380528	LOC123380528	transcript	XR_006586427.1	pseudogene	2	n.881-26106G>A
chrA1	234209260	G	A	PASS	upstream_gene_variant	MODIFIER	TRNAQ-UUG_7	TRNAQ-UUG_7	transcript	unassigned_transcript_34	protein_coding	-1	c.-594G>A
chrA1	234213199	C	T	PASS	downstream_gene_variant	MODIFIER	TRNAQ-UUG_7	TRNAQ-UUG_7	transcript	unassigned_transcript_34	protein_coding	-1	c.*3261C>T
chrA1	234215720	C	T	PASS	intron_variant	MODIFIER	LOC123380528	LOC123380528	transcript	XR_006586427.1	pseudogene	2	n.880+34303G>A
chrA1	234225632	G	A	PASS	intron_variant	MODIFIER	LOC123380528	LOC123380528	transcript	XR_006586427.1	pseudogene	2	n.880+24391C>T
chrA1	234231923	G	A	PASS	intron_variant	MODIFIER	LOC123380528	LOC123380528	transcript	XR_006586427.1	pseudogene	2	n.880+18100C>T
chrA1	234236179	C	T	PASS	intron_variant	MODIFIER	LOC123380528	LOC123380528	transcript	XR_006586427.1	pseudogene	2	n.880+13844G>A
chrA1	234279722	C	T	PASS	non_coding_transcript_exon_variant	MODIFIER	LOC123380528	LOC123380528	transcript	XR_006586426.1	pseudogene	1	n.224G>A
chrA1	234632689	C	T	PASS	downstream_gene_variant	MODIFIER	MED10	MED10	transcript	XM_023239707.2	protein_coding	-1	c.*4606C>T
chrA1	234632690	A	T	PASS	downstream_gene_variant	MODIFIER	MED10	MED10	transcript	XM_023239707.2	protein_coding	-1	c.*4607A>T
chrA1	235107494	G	C	PASS	intergenic_region	MODIFIER	LOC111556647-LOC123385535	LOC111556647-LOC123385535	intergenic_region	LOC111556647-LOC123385535		-1	n.235107494G>C
chrA1	235146234	G	A	PASS	intergenic_region	MODIFIER	LOC111556647-LOC123385535	LOC111556647-LOC123385535	intergenic_region	LOC111556647-LOC123385535		-1	n.235146234G>A
chrA1	235147422	G	A	PASS	intergenic_region	MODIFIER	LOC111556647-LOC123385535	LOC111556647-LOC123385535	intergenic_region	LOC111556647-LOC123385535		-1	n.235147422G>A
chrA1	235148903	G	A	PASS	intergenic_region	MODIFIER	LOC111556647-LOC123385535	LOC111556647-LOC123385535	intergenic_region	LOC111556647-LOC123385535		-1	n.235148903G>A
chrA1	235149686	A	G	PASS	intergenic_region	MODIFIER	LOC111556647-LOC123385535	LOC111556647-LOC123385535	intergenic_region	LOC111556647-LOC123385535		-1	n.235149686A>G
chrA1	235150224	C	T	PASS	intergenic_region	MODIFIER	LOC111556647-LOC123385535	LOC111556647-LOC123385535	intergenic_region	LOC111556647-LOC123385535		-1	n.235150224C>T
chrA1	235154127	G	C	PASS	intergenic_region	MODIFIER	LOC111556647-LOC123385535	LOC111556647-LOC123385535	intergenic_region	LOC111556647-LOC123385535		-1	n.235154127G>C
chrA1	235154809	G	A	PASS	intergenic_region	MODIFIER	LOC111556647-LOC123385535	LOC111556647-LOC123385535	intergenic_region	LOC111556647-LOC123385535		-1	n.235154809G>A
chrA1	235157195	G	A	PASS	intergenic_region	MODIFIER	LOC111556647-LOC123385535	LOC111556647-LOC123385535	intergenic_region	LOC111556647-LOC123385535		-1	n.235157195G>A
chrA1	235159478	G	A	PASS	downstream_gene_variant	MODIFIER	LOC123385535	LOC123385535	transcript	XR_006598254.1	pseudogene	-1	n.*4398C>T
chrA1	235159486	C	T	PASS	downstream_gene_variant	MODIFIER	LOC123385535	LOC123385535	transcript	XR_006598254.1	pseudogene	-1	n.*4390G>A
chrA1	235159688	C	A	PASS	downstream_gene_variant	MODIFIER	LOC123385535	LOC123385535	transcript	XR_006598254.1	pseudogene	-1	n.*4188G>T
chrA1	235159716	T	TTAGAATAGTTTTAGAGTGCTCGCTTCGGCAGCACATATAC	PASS	downstream_gene_variant	MODIFIER	LOC123385535	LOC123385535	transcript	XR_006598254.1	pseudogene	-1	n.*4159_*4160insGTATATGTGCTGCCGAAGCGAGCACTCTAAAACTATTCTA
chrA1	235161530	C	G	PASS	downstream_gene_variant	MODIFIER	LOC123385535	LOC123385535	transcript	XR_006598254.1	pseudogene	-1	n.*2346G>C
chrA1	235161771	G	A	PASS	downstream_gene_variant	MODIFIER	LOC123385535	LOC123385535	transcript	XR_006598254.1	pseudogene	-1	n.*2105C>T
chrA1	235161833	C	T	PASS	downstream_gene_variant	MODIFIER	LOC123385535	LOC123385535	transcript	XR_006598254.1	pseudogene	-1	n.*2043G>A
chrA1	235162548	C	T	PASS	downstream_gene_variant	MODIFIER	LOC123385535	LOC123385535	transcript	XR_006598254.1	pseudogene	-1	n.*1328G>A
chrA1	235163745	C	T	PASS	downstream_gene_variant	MODIFIER	LOC123385535	LOC123385535	transcript	XR_006598254.1	pseudogene	-1	n.*131G>A
chrA1	235166101	G	A	PASS	non_coding_transcript_exon_variant	MODIFIER	LOC123385535	LOC123385535	transcript	XR_006598254.1	pseudogene	1	n.286C>T
chrA1	235166161	C	G	PASS	non_coding_transcript_exon_variant	MODIFIER	LOC123385535	LOC123385535	transcript	XR_006598254.1	pseudogene	1	n.226G>C
chrA1	235166245	TA	T	PASS	non_coding_transcript_exon_variant	MODIFIER	LOC123385535	LOC123385535	transcript	XR_006598254.1	pseudogene	1	n.141delT
chrA1	235166247	CTGAT	C	PASS	non_coding_transcript_exon_variant	MODIFIER	LOC123385535	LOC123385535	transcript	XR_006598254.1	pseudogene	1	n.136_139delATCA
chrA1	235166604	G	A	PASS	upstream_gene_variant	MODIFIER	LOC123385535	LOC123385535	transcript	XR_006598254.1	pseudogene	-1	n.-218C>T
chrA1	235167224	C	T	PASS	upstream_gene_variant	MODIFIER	LOC123385535	LOC123385535	transcript	XR_006598254.1	pseudogene	-1	n.-838G>A
chrA1	235170385	T	C	PASS	upstream_gene_variant	MODIFIER	LOC123385535	LOC123385535	transcript	XR_006598254.1	pseudogene	-1	n.-3999A>G
chrA1	235170906	AG	A	PASS	upstream_gene_variant	MODIFIER	LOC123385535	LOC123385535	transcript	XR_006598254.1	pseudogene	-1	n.-4521delC
chrA1	235174329	AC	A	PASS	intergenic_region	MODIFIER	LOC123385535-ICE1	LOC123385535-ICE1	intergenic_region	LOC123385535-ICE1		-1	n.235174330delC
chrA1	235174337	AG	A	PASS	intergenic_region	MODIFIER	LOC123385535-ICE1	LOC123385535-ICE1	intergenic_region	LOC123385535-ICE1		-1	n.235174338delG
chrA1	235175283	G	A	PASS	intergenic_region	MODIFIER	LOC123385535-ICE1	LOC123385535-ICE1	intergenic_region	LOC123385535-ICE1		-1	n.235175283G>A
chrA1	235175327	G	A	PASS	intergenic_region	MODIFIER	LOC123385535-ICE1	LOC123385535-ICE1	intergenic_region	LOC123385535-ICE1		-1	n.235175327G>A
chrA1	235178730	C	T	PASS	intergenic_region	MODIFIER	LOC123385535-ICE1	LOC123385535-ICE1	intergenic_region	LOC123385535-ICE1		-1	n.235178730C>T
chrA1	235180443	T	C	PASS	intergenic_region	MODIFIER	LOC123385535-ICE1	LOC123385535-ICE1	intergenic_region	LOC123385535-ICE1		-1	n.235180443T>C
chrA1	235180505	GA	G	PASS	intergenic_region	MODIFIER	LOC123385535-ICE1	LOC123385535-ICE1	intergenic_region	LOC123385535-ICE1		-1	n.235180506delA
chrA1	235180596	A	G	PASS	intergenic_region	MODIFIER	LOC123385535-ICE1	LOC123385535-ICE1	intergenic_region	LOC123385535-ICE1		-1	n.235180596A>G
chrA1	235180665	G	A	PASS	intergenic_region	MODIFIER	LOC123385535-ICE1	LOC123385535-ICE1	intergenic_region	LOC123385535-ICE1		-1	n.235180665G>A
chrA1	235180975	C	T	PASS	intergenic_region	MODIFIER	LOC123385535-ICE1	LOC123385535-ICE1	intergenic_region	LOC123385535-ICE1		-1	n.235180975C>T
chrA1	235181349	ATTGTGCTATGT	A	PASS	intergenic_region	MODIFIER	LOC123385535-ICE1	LOC123385535-ICE1	intergenic_region	LOC123385535-ICE1		-1	n.235181350_235181360delTTGTGCTATGT
chrA1	235186371	T	TG	PASS	intergenic_region	MODIFIER	LOC123385535-ICE1	LOC123385535-ICE1	intergenic_region	LOC123385535-ICE1		-1	n.235186371_235186372insG
chrA1	235192189	A	G	PASS	intergenic_region	MODIFIER	LOC123385535-ICE1	LOC123385535-ICE1	intergenic_region	LOC123385535-ICE1		-1	n.235192189A>G
chrA1	235194073	T	C	PASS	intergenic_region	MODIFIER	LOC123385535-ICE1	LOC123385535-ICE1	intergenic_region	LOC123385535-ICE1		-1	n.235194073T>C
chrA1	235194304	A	G	PASS	intergenic_region	MODIFIER	LOC123385535-ICE1	LOC123385535-ICE1	intergenic_region	LOC123385535-ICE1		-1	n.235194304A>G
chrA1	235194415	A	G	PASS	intergenic_region	MODIFIER	LOC123385535-ICE1	LOC123385535-ICE1	intergenic_region	LOC123385535-ICE1		-1	n.235194415A>G
chrA1	235206416	A	G	PASS	intergenic_region	MODIFIER	LOC123385535-ICE1	LOC123385535-ICE1	intergenic_region	LOC123385535-ICE1		-1	n.235206416A>G
chrA1	235206418	C	A	PASS	intergenic_region	MODIFIER	LOC123385535-ICE1	LOC123385535-ICE1	intergenic_region	LOC123385535-ICE1		-1	n.235206418C>A
chrA1	235223960	C	T	PASS	intergenic_region	MODIFIER	LOC123385535-ICE1	LOC123385535-ICE1	intergenic_region	LOC123385535-ICE1		-1	n.235223960C>T
chrA1	235224442	A	T	PASS	intergenic_region	MODIFIER	LOC123385535-ICE1	LOC123385535-ICE1	intergenic_region	LOC123385535-ICE1		-1	n.235224442A>T
chrA1	235224609	T	C	PASS	intergenic_region	MODIFIER	LOC123385535-ICE1	LOC123385535-ICE1	intergenic_region	LOC123385535-ICE1		-1	n.235224609T>C
chrA1	235227125	G	A	PASS	intergenic_region	MODIFIER	LOC123385535-ICE1	LOC123385535-ICE1	intergenic_region	LOC123385535-ICE1		-1	n.235227125G>A
chrA1	235229331	A	AT	PASS	intergenic_region	MODIFIER	LOC123385535-ICE1	LOC123385535-ICE1	intergenic_region	LOC123385535-ICE1		-1	n.235229331_235229332insT
chrA1	235235111	C	T	PASS	intergenic_region	MODIFIER	LOC123385535-ICE1	LOC123385535-ICE1	intergenic_region	LOC123385535-ICE1		-1	n.235235111C>T
chrA1	235235141	G	A	PASS	intergenic_region	MODIFIER	LOC123385535-ICE1	LOC123385535-ICE1	intergenic_region	LOC123385535-ICE1		-1	n.235235141G>A
chrA1	235238132	A	G	PASS	intergenic_region	MODIFIER	LOC123385535-ICE1	LOC123385535-ICE1	intergenic_region	LOC123385535-ICE1		-1	n.235238132A>G
chrA1	235241221	C	T	PASS	intergenic_region	MODIFIER	LOC123385535-ICE1	LOC123385535-ICE1	intergenic_region	LOC123385535-ICE1		-1	n.235241221C>T
chrA1	235243378	C	A	PASS	intergenic_region	MODIFIER	LOC123385535-ICE1	LOC123385535-ICE1	intergenic_region	LOC123385535-ICE1		-1	n.235243378C>A
chrA1	235245461	A	G	PASS	intergenic_region	MODIFIER	LOC123385535-ICE1	LOC123385535-ICE1	intergenic_region	LOC123385535-ICE1		-1	n.235245461A>G
chrA1	235245767	G	A	PASS	intergenic_region	MODIFIER	LOC123385535-ICE1	LOC123385535-ICE1	intergenic_region	LOC123385535-ICE1		-1	n.235245767G>A
chrA1	235247195	T	C	PASS	intergenic_region	MODIFIER	LOC123385535-ICE1	LOC123385535-ICE1	intergenic_region	LOC123385535-ICE1		-1	n.235247195T>C
chrA1	235252163	G	T	PASS	intergenic_region	MODIFIER	LOC123385535-ICE1	LOC123385535-ICE1	intergenic_region	LOC123385535-ICE1		-1	n.235252163G>T
chrA1	235253147	T	C	PASS	intergenic_region	MODIFIER	LOC123385535-ICE1	LOC123385535-ICE1	intergenic_region	LOC123385535-ICE1		-1	n.235253147T>C
chrA1	235253970	CTG	C	PASS	intergenic_region	MODIFIER	LOC123385535-ICE1	LOC123385535-ICE1	intergenic_region	LOC123385535-ICE1		-1	n.235253971_235253972delTG
chrA1	235254351	G	A	PASS	intergenic_region	MODIFIER	LOC123385535-ICE1	LOC123385535-ICE1	intergenic_region	LOC123385535-ICE1		-1	n.235254351G>A
chrA1	235257230	G	A	PASS	intergenic_region	MODIFIER	LOC123385535-ICE1	LOC123385535-ICE1	intergenic_region	LOC123385535-ICE1		-1	n.235257230G>A
chrA1	235258115	G	A	PASS	intergenic_region	MODIFIER	LOC123385535-ICE1	LOC123385535-ICE1	intergenic_region	LOC123385535-ICE1		-1	n.235258115G>A
chrA1	235258623	G	A	PASS	intergenic_region	MODIFIER	LOC123385535-ICE1	LOC123385535-ICE1	intergenic_region	LOC123385535-ICE1		-1	n.235258623G>A
chrA1	235259269	C	T	PASS	intergenic_region	MODIFIER	LOC123385535-ICE1	LOC123385535-ICE1	intergenic_region	LOC123385535-ICE1		-1	n.235259269C>T
chrA1	235259863	G	C	PASS	intergenic_region	MODIFIER	LOC123385535-ICE1	LOC123385535-ICE1	intergenic_region	LOC123385535-ICE1		-1	n.235259863G>C
chrA1	235259951	C	T	PASS	intergenic_region	MODIFIER	LOC123385535-ICE1	LOC123385535-ICE1	intergenic_region	LOC123385535-ICE1		-1	n.235259951C>T
chrA1	235262124	G	A	PASS	intergenic_region	MODIFIER	LOC123385535-ICE1	LOC123385535-ICE1	intergenic_region	LOC123385535-ICE1		-1	n.235262124G>A
chrA1	235262346	C	A	PASS	intergenic_region	MODIFIER	LOC123385535-ICE1	LOC123385535-ICE1	intergenic_region	LOC123385535-ICE1		-1	n.235262346C>A
chrA1	235262997	C	T	PASS	intergenic_region	MODIFIER	LOC123385535-ICE1	LOC123385535-ICE1	intergenic_region	LOC123385535-ICE1		-1	n.235262997C>T
chrA1	235263227	C	T	PASS	intergenic_region	MODIFIER	LOC123385535-ICE1	LOC123385535-ICE1	intergenic_region	LOC123385535-ICE1		-1	n.235263227C>T
chrA1	235264421	C	T	PASS	intergenic_region	MODIFIER	LOC123385535-ICE1	LOC123385535-ICE1	intergenic_region	LOC123385535-ICE1		-1	n.235264421C>T
chrA1	235267227	G	A	PASS	intergenic_region	MODIFIER	LOC123385535-ICE1	LOC123385535-ICE1	intergenic_region	LOC123385535-ICE1		-1	n.235267227G>A
chrA1	235267469	C	T	PASS	intergenic_region	MODIFIER	LOC123385535-ICE1	LOC123385535-ICE1	intergenic_region	LOC123385535-ICE1		-1	n.235267469C>T
chrA1	235267479	A	AG	PASS	intergenic_region	MODIFIER	LOC123385535-ICE1	LOC123385535-ICE1	intergenic_region	LOC123385535-ICE1		-1	n.235267479_235267480insG
chrA1	235267487	G	A	PASS	intergenic_region	MODIFIER	LOC123385535-ICE1	LOC123385535-ICE1	intergenic_region	LOC123385535-ICE1		-1	n.235267487G>A
chrA1	235267960	G	A	PASS	intergenic_region	MODIFIER	LOC123385535-ICE1	LOC123385535-ICE1	intergenic_region	LOC123385535-ICE1		-1	n.235267960G>A
chrA1	235268699	T	C	PASS	intergenic_region	MODIFIER	LOC123385535-ICE1	LOC123385535-ICE1	intergenic_region	LOC123385535-ICE1		-1	n.235268699T>C
chrA1	235269913	C	T	PASS	intergenic_region	MODIFIER	LOC123385535-ICE1	LOC123385535-ICE1	intergenic_region	LOC123385535-ICE1		-1	n.235269913C>T
chrA1	235272468	GC	G	PASS	intergenic_region	MODIFIER	LOC123385535-ICE1	LOC123385535-ICE1	intergenic_region	LOC123385535-ICE1		-1	n.235272469delC
chrA1	235273040	G	A	PASS	intergenic_region	MODIFIER	LOC123385535-ICE1	LOC123385535-ICE1	intergenic_region	LOC123385535-ICE1		-1	n.235273040G>A
chrA1	235273124	C	T	PASS	intergenic_region	MODIFIER	LOC123385535-ICE1	LOC123385535-ICE1	intergenic_region	LOC123385535-ICE1		-1	n.235273124C>T
chrA1	235273345	C	G	PASS	intergenic_region	MODIFIER	LOC123385535-ICE1	LOC123385535-ICE1	intergenic_region	LOC123385535-ICE1		-1	n.235273345C>G
chrA1	235273481	C	G	PASS	intergenic_region	MODIFIER	LOC123385535-ICE1	LOC123385535-ICE1	intergenic_region	LOC123385535-ICE1		-1	n.235273481C>G
chrA1	235273602	G	A	PASS	intergenic_region	MODIFIER	LOC123385535-ICE1	LOC123385535-ICE1	intergenic_region	LOC123385535-ICE1		-1	n.235273602G>A
chrA1	235274227	C	T	PASS	intergenic_region	MODIFIER	LOC123385535-ICE1	LOC123385535-ICE1	intergenic_region	LOC123385535-ICE1		-1	n.235274227C>T
chrA1	235274511	G	A	PASS	intergenic_region	MODIFIER	LOC123385535-ICE1	LOC123385535-ICE1	intergenic_region	LOC123385535-ICE1		-1	n.235274511G>A
chrA1	235275150	G	A	PASS	intergenic_region	MODIFIER	LOC123385535-ICE1	LOC123385535-ICE1	intergenic_region	LOC123385535-ICE1		-1	n.235275150G>A
chrA1	235275597	G	C	PASS	intergenic_region	MODIFIER	LOC123385535-ICE1	LOC123385535-ICE1	intergenic_region	LOC123385535-ICE1		-1	n.235275597G>C
chrA1	235276138	T	C	PASS	intergenic_region	MODIFIER	LOC123385535-ICE1	LOC123385535-ICE1	intergenic_region	LOC123385535-ICE1		-1	n.235276138T>C
chrA1	235276393	A	G	PASS	intergenic_region	MODIFIER	LOC123385535-ICE1	LOC123385535-ICE1	intergenic_region	LOC123385535-ICE1		-1	n.235276393A>G
chrA1	235276967	A	G	PASS	intergenic_region	MODIFIER	LOC123385535-ICE1	LOC123385535-ICE1	intergenic_region	LOC123385535-ICE1		-1	n.235276967A>G
chrA1	235277379	C	T	PASS	intergenic_region	MODIFIER	LOC123385535-ICE1	LOC123385535-ICE1	intergenic_region	LOC123385535-ICE1		-1	n.235277379C>T
chrA1	235277732	G	T	PASS	intergenic_region	MODIFIER	LOC123385535-ICE1	LOC123385535-ICE1	intergenic_region	LOC123385535-ICE1		-1	n.235277732G>T
chrA1	235278239	G	A	PASS	intergenic_region	MODIFIER	LOC123385535-ICE1	LOC123385535-ICE1	intergenic_region	LOC123385535-ICE1		-1	n.235278239G>A
chrA1	235278369	T	C	PASS	intergenic_region	MODIFIER	LOC123385535-ICE1	LOC123385535-ICE1	intergenic_region	LOC123385535-ICE1		-1	n.235278369T>C
chrA1	235278493	G	A	PASS	intergenic_region	MODIFIER	LOC123385535-ICE1	LOC123385535-ICE1	intergenic_region	LOC123385535-ICE1		-1	n.235278493G>A
chrA1	235278842	T	C	PASS	intergenic_region	MODIFIER	LOC123385535-ICE1	LOC123385535-ICE1	intergenic_region	LOC123385535-ICE1		-1	n.235278842T>C
chrA1	235279318	T	C	PASS	intergenic_region	MODIFIER	LOC123385535-ICE1	LOC123385535-ICE1	intergenic_region	LOC123385535-ICE1		-1	n.235279318T>C
chrA1	235279645	G	A	PASS	intergenic_region	MODIFIER	LOC123385535-ICE1	LOC123385535-ICE1	intergenic_region	LOC123385535-ICE1		-1	n.235279645G>A
chrA1	235281606	C	T	PASS	intergenic_region	MODIFIER	LOC123385535-ICE1	LOC123385535-ICE1	intergenic_region	LOC123385535-ICE1		-1	n.235281606C>T
chrA1	235281688	CT	C	PASS	intergenic_region	MODIFIER	LOC123385535-ICE1	LOC123385535-ICE1	intergenic_region	LOC123385535-ICE1		-1	n.235281689delT
chrA1	235282410	G	A	PASS	intergenic_region	MODIFIER	LOC123385535-ICE1	LOC123385535-ICE1	intergenic_region	LOC123385535-ICE1		-1	n.235282410G>A
chrA1	235283218	C	T	PASS	intergenic_region	MODIFIER	LOC123385535-ICE1	LOC123385535-ICE1	intergenic_region	LOC123385535-ICE1		-1	n.235283218C>T
chrA1	235284815	G	GGTTT	PASS	intergenic_region	MODIFIER	LOC123385535-ICE1	LOC123385535-ICE1	intergenic_region	LOC123385535-ICE1		-1	n.235284815_235284816insGTTT
chrA1	235284904	G	C	PASS	intergenic_region	MODIFIER	LOC123385535-ICE1	LOC123385535-ICE1	intergenic_region	LOC123385535-ICE1		-1	n.235284904G>C
chrA1	235285657	A	G	PASS	intergenic_region	MODIFIER	LOC123385535-ICE1	LOC123385535-ICE1	intergenic_region	LOC123385535-ICE1		-1	n.235285657A>G
chrA1	235289063	A	G	PASS	intergenic_region	MODIFIER	LOC123385535-ICE1	LOC123385535-ICE1	intergenic_region	LOC123385535-ICE1		-1	n.235289063A>G
chrA1	235290587	G	A	PASS	intergenic_region	MODIFIER	LOC123385535-ICE1	LOC123385535-ICE1	intergenic_region	LOC123385535-ICE1		-1	n.235290587G>A
chrA1	235290814	C	T	PASS	intergenic_region	MODIFIER	LOC123385535-ICE1	LOC123385535-ICE1	intergenic_region	LOC123385535-ICE1		-1	n.235290814C>T
chrA1	235291473	C	T	PASS	intergenic_region	MODIFIER	LOC123385535-ICE1	LOC123385535-ICE1	intergenic_region	LOC123385535-ICE1		-1	n.235291473C>T
chrA1	235291526	G	A	PASS	intergenic_region	MODIFIER	LOC123385535-ICE1	LOC123385535-ICE1	intergenic_region	LOC123385535-ICE1		-1	n.235291526G>A
chrA1	235292344	A	G	PASS	intergenic_region	MODIFIER	LOC123385535-ICE1	LOC123385535-ICE1	intergenic_region	LOC123385535-ICE1		-1	n.235292344A>G
chrA1	235292587	G	C	PASS	intergenic_region	MODIFIER	LOC123385535-ICE1	LOC123385535-ICE1	intergenic_region	LOC123385535-ICE1		-1	n.235292587G>C
chrA1	235293115	G	A	PASS	intergenic_region	MODIFIER	LOC123385535-ICE1	LOC123385535-ICE1	intergenic_region	LOC123385535-ICE1		-1	n.235293115G>A
chrA1	235295190	A	G	PASS	intergenic_region	MODIFIER	LOC123385535-ICE1	LOC123385535-ICE1	intergenic_region	LOC123385535-ICE1		-1	n.235295190A>G
chrA1	235296057	TCC	T	PASS	intergenic_region	MODIFIER	LOC123385535-ICE1	LOC123385535-ICE1	intergenic_region	LOC123385535-ICE1		-1	n.235296058_235296059delCC
chrA1	235296179	G	A	PASS	intergenic_region	MODIFIER	LOC123385535-ICE1	LOC123385535-ICE1	intergenic_region	LOC123385535-ICE1		-1	n.235296179G>A
chrA1	235297169	C	T	PASS	intergenic_region	MODIFIER	LOC123385535-ICE1	LOC123385535-ICE1	intergenic_region	LOC123385535-ICE1		-1	n.235297169C>T
chrA1	235298097	G	A	PASS	intergenic_region	MODIFIER	LOC123385535-ICE1	LOC123385535-ICE1	intergenic_region	LOC123385535-ICE1		-1	n.235298097G>A
chrA1	235298439	C	T	PASS	intergenic_region	MODIFIER	LOC123385535-ICE1	LOC123385535-ICE1	intergenic_region	LOC123385535-ICE1		-1	n.235298439C>T
chrA1	235298622	G	C	PASS	intergenic_region	MODIFIER	LOC123385535-ICE1	LOC123385535-ICE1	intergenic_region	LOC123385535-ICE1		-1	n.235298622G>C
chrA1	235299149	C	T	PASS	intergenic_region	MODIFIER	LOC123385535-ICE1	LOC123385535-ICE1	intergenic_region	LOC123385535-ICE1		-1	n.235299149C>T
chrA1	235299180	G	GATAC	PASS	intergenic_region	MODIFIER	LOC123385535-ICE1	LOC123385535-ICE1	intergenic_region	LOC123385535-ICE1		-1	n.235299180_235299181insATAC
chrA1	235299657	C	T	PASS	intergenic_region	MODIFIER	LOC123385535-ICE1	LOC123385535-ICE1	intergenic_region	LOC123385535-ICE1		-1	n.235299657C>T
chrA1	235300027	G	A	PASS	intergenic_region	MODIFIER	LOC123385535-ICE1	LOC123385535-ICE1	intergenic_region	LOC123385535-ICE1		-1	n.235300027G>A
chrA1	235301858	C	T	PASS	intergenic_region	MODIFIER	LOC123385535-ICE1	LOC123385535-ICE1	intergenic_region	LOC123385535-ICE1		-1	n.235301858C>T
chrA1	235305047	G	A	PASS	intergenic_region	MODIFIER	LOC123385535-ICE1	LOC123385535-ICE1	intergenic_region	LOC123385535-ICE1		-1	n.235305047G>A
chrA1	235308064	T	C	PASS	intergenic_region	MODIFIER	LOC123385535-ICE1	LOC123385535-ICE1	intergenic_region	LOC123385535-ICE1		-1	n.235308064T>C
chrA1	235308532	G	C	PASS	downstream_gene_variant	MODIFIER	ICE1	ICE1	transcript	XM_023239718.2	protein_coding	-1	c.*5556C>G
chrA1	235310216	C	T	PASS	downstream_gene_variant	MODIFIER	ICE1	ICE1	transcript	XM_023239718.2	protein_coding	-1	c.*3872G>A
chrA1	235311995	C	G	PASS	downstream_gene_variant	MODIFIER	ICE1	ICE1	transcript	XM_023239718.2	protein_coding	-1	c.*2093G>C
chrA1	235316955	C	T	PASS	downstream_gene_variant	MODIFIER	ICE1	ICE1	transcript	XM_045039080.1	protein_coding	-1	c.*3628G>A
chrA1	235317266	C	T	PASS	downstream_gene_variant	MODIFIER	ICE1	ICE1	transcript	XM_045039080.1	protein_coding	-1	c.*3317G>A
chrA1	235319123	G	A	PASS	downstream_gene_variant	MODIFIER	ICE1	ICE1	transcript	XM_045039080.1	protein_coding	-1	c.*1460C>T
chrA1	235319381	C	A	PASS	downstream_gene_variant	MODIFIER	ICE1	ICE1	transcript	XM_045039080.1	protein_coding	-1	c.*1202G>T
chrA1	235319869	T	C	PASS	downstream_gene_variant	MODIFIER	ICE1	ICE1	transcript	XM_045039080.1	protein_coding	-1	c.*714A>G
chrA1	235320778	A	G	PASS	downstream_gene_variant	MODIFIER	ICE1	ICE1	transcript	XM_023239724.2	protein_coding	-1	c.*3042T>C
chrA1	235323260	C	T	PASS	downstream_gene_variant	MODIFIER	ICE1	ICE1	transcript	XM_023239724.2	protein_coding	-1	c.*560G>A
chrA1	235324253	A	G	PASS	intron_variant	MODIFIER	ICE1	ICE1	transcript	XM_023239718.2	protein_coding	15	c.6199-399T>C
chrA1	235325028	G	C	PASS	intron_variant	MODIFIER	ICE1	ICE1	transcript	XM_023239718.2	protein_coding	15	c.6199-1174C>G
chrA1	235327230	G	A	PASS	intron_variant	MODIFIER	ICE1	ICE1	transcript	XM_023239718.2	protein_coding	14	c.6038-291C>T
chrA1	235328598	T	C	PASS	intron_variant	MODIFIER	ICE1	ICE1	transcript	XM_023239718.2	protein_coding	14	c.6037+932A>G
chrA1	235330376	G	A	PASS	intron_variant	MODIFIER	ICE1	ICE1	transcript	XM_023239718.2	protein_coding	13	c.5868+462C>T
chrA1	235332835	C	T	PASS	missense_variant	MODERATE	ICE1	ICE1	transcript	XM_023239718.2	protein_coding	13	c.3871G>A	p.Ala1291Thr
chrA1	235335463	C	G	PASS	missense_variant	MODERATE	ICE1	ICE1	transcript	XM_023239718.2	protein_coding	13	c.1243G>C	p.Asp415His
chrA1	235339466	C	T	PASS	intron_variant	MODIFIER	ICE1	ICE1	transcript	XM_023239718.2	protein_coding	11	c.692-1168G>A
chrA1	235341589	G	A	PASS	intron_variant	MODIFIER	ICE1	ICE1	transcript	XM_023239718.2	protein_coding	10	c.605-492C>T
chrA1	235341653	T	C	PASS	intron_variant	MODIFIER	ICE1	ICE1	transcript	XM_023239718.2	protein_coding	10	c.605-556A>G
chrA1	235342977	A	C	PASS	intron_variant	MODIFIER	ICE1	ICE1	transcript	XM_023239718.2	protein_coding	10	c.605-1880T>G
chrA1	235345345	T	G	PASS	intron_variant	MODIFIER	ICE1	ICE1	transcript	XM_023239718.2	protein_coding	10	c.604+3288A>C
chrA1	235353657	G	A	PASS	intron_variant	MODIFIER	ICE1	ICE1	transcript	XM_023239718.2	protein_coding	5	c.309+168C>T
chrA1	235354288	G	T	PASS	intron_variant	MODIFIER	ICE1	ICE1	transcript	XM_023239718.2	protein_coding	4	c.198-352C>A
chrA1	235355046	G	A	PASS	intron_variant	MODIFIER	ICE1	ICE1	transcript	XM_023239718.2	protein_coding	3	c.179-348C>T
chrA1	235355148	G	T	PASS	intron_variant	MODIFIER	ICE1	ICE1	transcript	XM_023239718.2	protein_coding	3	c.179-450C>A
chrA1	235356235	T	C	PASS	intron_variant	MODIFIER	ICE1	ICE1	transcript	XM_023239718.2	protein_coding	3	c.178+894A>G
chrA1	235361627	T	C	PASS	intron_variant	MODIFIER	ICE1	ICE1	transcript	XM_023239718.2	protein_coding	1	c.85-3757A>G
chrA1	235363741	G	C	PASS	intron_variant	MODIFIER	ICE1	ICE1	transcript	XM_023239718.2	protein_coding	1	c.85-5871C>G
chrA1	235363851	G	A	PASS	intron_variant	MODIFIER	ICE1	ICE1	transcript	XM_023239718.2	protein_coding	1	c.85-5981C>T
chrA1	235366900	C	T	PASS	upstream_gene_variant	MODIFIER	LOC102900202	LOC102900202	transcript	XM_019813024.3	protein_coding	-1	c.-4727C>T
chrA1	235372694	G	T	PASS	upstream_gene_variant	MODIFIER	ICE1	ICE1	transcript	XM_023239718.2	protein_coding	-1	c.-2473C>A
chrA1	235372723	G	A	PASS	upstream_gene_variant	MODIFIER	ICE1	ICE1	transcript	XM_023239718.2	protein_coding	-1	c.-2502C>T
chrA1	235373035	AAACTCAT	A	PASS	upstream_gene_variant	MODIFIER	ICE1	ICE1	transcript	XM_023239718.2	protein_coding	-1	c.-2821_-2815delATGAGTT
chrA1	235373212	A	T	PASS	synonymous_variant	LOW	LOC102900202	LOC102900202	transcript	XM_019813024.3	protein_coding	2	c.414A>T	p.Leu138Leu
chrA1	235374389	C	T	PASS	stop_gained	HIGH	LOC102900202	LOC102900202	transcript	XM_019813024.3	protein_coding	3	c.595C>T	p.Gln199*
chrA1	235374397	A	G	PASS	splice_region_variant&synonymous_variant	LOW	LOC102900202	LOC102900202	transcript	XM_019813024.3	protein_coding	3	c.603A>G	p.Pro201Pro
chrA1	235374439	C	T	PASS	upstream_gene_variant	MODIFIER	ICE1	ICE1	transcript	XM_023239718.2	protein_coding	-1	c.-4218G>A
chrA1	235374808	C	T	PASS	upstream_gene_variant	MODIFIER	ICE1	ICE1	transcript	XM_023239718.2	protein_coding	-1	c.-4587G>A
chrA1	235375086	C	T	PASS	upstream_gene_variant	MODIFIER	ICE1	ICE1	transcript	XM_023239718.2	protein_coding	-1	c.-4865G>A
chrA1	235375106	G	T	PASS	upstream_gene_variant	MODIFIER	ICE1	ICE1	transcript	XM_023239718.2	protein_coding	-1	c.-4885C>A
chrA1	235375654	C	A	PASS	intron_variant	MODIFIER	LOC102900202	LOC102900202	transcript	XM_019813024.3	protein_coding	3	c.605-144C>A
chrA1	235375998	G	A	PASS	missense_variant	MODERATE	LOC102900202	LOC102900202	transcript	XM_019813024.3	protein_coding	4	c.805G>A	p.Gly269Ser
chrA1	235376825	T	C	PASS	3_prime_UTR_variant	MODIFIER	LOC102900202	LOC102900202	transcript	XM_019813024.3	protein_coding	4	c.*9T>C
chrA1	235377758	G	A	PASS	3_prime_UTR_variant	MODIFIER	LOC102900202	LOC102900202	transcript	XM_019813024.3	protein_coding	5	c.*642G>A
chrA1	235377981	C	T	PASS	3_prime_UTR_variant	MODIFIER	LOC102900202	LOC102900202	transcript	XM_019813024.3	protein_coding	5	c.*865C>T
chrA1	235380004	C	G	PASS	3_prime_UTR_variant	MODIFIER	LOC102900202	LOC102900202	transcript	XM_019813024.3	protein_coding	6	c.*1763C>G
chrA1	235380304	G	A	PASS	3_prime_UTR_variant	MODIFIER	LOC102900202	LOC102900202	transcript	XM_019813024.3	protein_coding	6	c.*2063G>A
chrA1	235380595	G	A	PASS	3_prime_UTR_variant	MODIFIER	LOC102900202	LOC102900202	transcript	XM_019813024.3	protein_coding	6	c.*2354G>A
chrA1	235381182	C	T	PASS	3_prime_UTR_variant	MODIFIER	LOC102900202	LOC102900202	transcript	XM_019813024.3	protein_coding	6	c.*2941C>T
chrA1	235382854	C	T	PASS	downstream_gene_variant	MODIFIER	LOC102900202	LOC102900202	transcript	XM_019813024.3	protein_coding	-1	c.*4613C>T
chrA1	235384047	C	T	PASS	downstream_gene_variant	MODIFIER	LOC102900202	LOC102900202	transcript	XM_019813024.3	protein_coding	-1	c.*5806C>T
chrA1	235385414	A	G	PASS	downstream_gene_variant	MODIFIER	LOC102900202	LOC102900202	transcript	XM_019813024.3	protein_coding	-1	c.*7173A>G
chrA1	235385477	C	T	PASS	downstream_gene_variant	MODIFIER	LOC102900202	LOC102900202	transcript	XM_019813024.3	protein_coding	-1	c.*7236C>T
chrA1	235385641	C	T	PASS	downstream_gene_variant	MODIFIER	LOC102900202	LOC102900202	transcript	XM_019813024.3	protein_coding	-1	c.*7400C>T
chrA1	235385975	G	A	PASS	downstream_gene_variant	MODIFIER	LOC102900202	LOC102900202	transcript	XM_019813024.3	protein_coding	-1	c.*7734G>A
chrA1	235385977	G	A	PASS	downstream_gene_variant	MODIFIER	LOC102900202	LOC102900202	transcript	XM_019813024.3	protein_coding	-1	c.*7736G>A
chrA1	235386264	C	T	PASS	downstream_gene_variant	MODIFIER	LOC102900202	LOC102900202	transcript	XM_019813024.3	protein_coding	-1	c.*8023C>T
chrA1	235386760	T	G	PASS	downstream_gene_variant	MODIFIER	LOC102900202	LOC102900202	transcript	XR_006586492.1	pseudogene	-1	n.*4551T>G
chrA1	235387116	A	C	PASS	downstream_gene_variant	MODIFIER	LOC102900202	LOC102900202	transcript	XR_006586492.1	pseudogene	-1	n.*4907A>C
chrA1	235387455	C	T	PASS	intergenic_region	MODIFIER	LOC102900202-ADAMTS16	LOC102900202-ADAMTS16	intergenic_region	LOC102900202-ADAMTS16		-1	n.235387455C>T
chrA1	235389343	T	C	PASS	intergenic_region	MODIFIER	LOC102900202-ADAMTS16	LOC102900202-ADAMTS16	intergenic_region	LOC102900202-ADAMTS16		-1	n.235389343T>C
chrA1	235389483	T	C	PASS	intergenic_region	MODIFIER	LOC102900202-ADAMTS16	LOC102900202-ADAMTS16	intergenic_region	LOC102900202-ADAMTS16		-1	n.235389483T>C
chrA1	235390009	C	T	PASS	intergenic_region	MODIFIER	LOC102900202-ADAMTS16	LOC102900202-ADAMTS16	intergenic_region	LOC102900202-ADAMTS16		-1	n.235390009C>T
chrA1	235390104	T	C	PASS	intergenic_region	MODIFIER	LOC102900202-ADAMTS16	LOC102900202-ADAMTS16	intergenic_region	LOC102900202-ADAMTS16		-1	n.235390104T>C
chrA1	235390105	C	T	PASS	intergenic_region	MODIFIER	LOC102900202-ADAMTS16	LOC102900202-ADAMTS16	intergenic_region	LOC102900202-ADAMTS16		-1	n.235390105C>T
chrA1	235390136	G	A	PASS	intergenic_region	MODIFIER	LOC102900202-ADAMTS16	LOC102900202-ADAMTS16	intergenic_region	LOC102900202-ADAMTS16		-1	n.235390136G>A
chrA1	235390160	C	T	PASS	intergenic_region	MODIFIER	LOC102900202-ADAMTS16	LOC102900202-ADAMTS16	intergenic_region	LOC102900202-ADAMTS16		-1	n.235390160C>T
chrA1	235390210	G	T	PASS	intergenic_region	MODIFIER	LOC102900202-ADAMTS16	LOC102900202-ADAMTS16	intergenic_region	LOC102900202-ADAMTS16		-1	n.235390210G>T
chrA1	235390956	G	A	PASS	intergenic_region	MODIFIER	LOC102900202-ADAMTS16	LOC102900202-ADAMTS16	intergenic_region	LOC102900202-ADAMTS16		-1	n.235390956G>A
chrA1	235392113	A	G	PASS	intergenic_region	MODIFIER	LOC102900202-ADAMTS16	LOC102900202-ADAMTS16	intergenic_region	LOC102900202-ADAMTS16		-1	n.235392113A>G
chrA1	235392298	G	A	PASS	intergenic_region	MODIFIER	LOC102900202-ADAMTS16	LOC102900202-ADAMTS16	intergenic_region	LOC102900202-ADAMTS16		-1	n.235392298G>A
chrA1	235392732	G	A	PASS	intergenic_region	MODIFIER	LOC102900202-ADAMTS16	LOC102900202-ADAMTS16	intergenic_region	LOC102900202-ADAMTS16		-1	n.235392732G>A
chrA1	235392916	G	A	PASS	intergenic_region	MODIFIER	LOC102900202-ADAMTS16	LOC102900202-ADAMTS16	intergenic_region	LOC102900202-ADAMTS16		-1	n.235392916G>A
chrA1	235471246	G	A	PASS	intron_variant	MODIFIER	ADAMTS16	ADAMTS16	transcript	XM_023239735.2	protein_coding	18	c.2847-9194C>T
chrA1	235558231	A	T	PASS	intron_variant	MODIFIER	ADAMTS16	ADAMTS16	transcript	XM_023239735.2	protein_coding	6	c.1105-153T>A
chrA1	235822314	G	A	PASS	intergenic_region	MODIFIER	ADAMTS16-LOC109493152	ADAMTS16-LOC109493152	intergenic_region	ADAMTS16-LOC109493152		-1	n.235822314G>A
chrA1	235964259	G	A	PASS	intergenic_region	MODIFIER	LOC123385543-LOC109493154	LOC123385543-LOC109493154	intergenic_region	LOC123385543-LOC109493154		-1	n.235964259G>A
chrA1	236277757	C	T	PASS	intergenic_region	MODIFIER	LOC123380564-LOC102900491	LOC123380564-LOC102900491	intergenic_region	LOC123380564-LOC102900491		-1	n.236277757C>T
chrA1	236293635	C	T	PASS	intergenic_region	MODIFIER	LOC123380564-LOC102900491	LOC123380564-LOC102900491	intergenic_region	LOC123380564-LOC102900491		-1	n.236293635C>T
chrA1	236298115	T	TATATATATATGAACATATATATGAAC	PASS	intergenic_region	MODIFIER	LOC123380564-LOC102900491	LOC123380564-LOC102900491	intergenic_region	LOC123380564-LOC102900491		-1	n.236298115_236298116insATATATATATGAACATATATATGAAC
chrA1	236373832	C	T	PASS	intergenic_region	MODIFIER	LOC102900491-LOC109492365	LOC102900491-LOC109492365	intergenic_region	LOC102900491-LOC109492365		-1	n.236373832C>T
chrA1	236376367	G	A	PASS	intergenic_region	MODIFIER	LOC102900491-LOC109492365	LOC102900491-LOC109492365	intergenic_region	LOC102900491-LOC109492365		-1	n.236376367G>A
chrA1	236388256	G	A	PASS	intergenic_region	MODIFIER	LOC102900491-LOC109492365	LOC102900491-LOC109492365	intergenic_region	LOC102900491-LOC109492365		-1	n.236388256G>A
chrA1	236394818	C	T	PASS	intergenic_region	MODIFIER	LOC102900491-LOC109492365	LOC102900491-LOC109492365	intergenic_region	LOC102900491-LOC109492365		-1	n.236394818C>T
chrA1	236402845	C	T	PASS	intergenic_region	MODIFIER	LOC102900491-LOC109492365	LOC102900491-LOC109492365	intergenic_region	LOC102900491-LOC109492365		-1	n.236402845C>T
chrA1	236402862	A	G	PASS	intergenic_region	MODIFIER	LOC102900491-LOC109492365	LOC102900491-LOC109492365	intergenic_region	LOC102900491-LOC109492365		-1	n.236402862A>G
chrA1	236416385	G	A	PASS	intergenic_region	MODIFIER	LOC102900491-LOC109492365	LOC102900491-LOC109492365	intergenic_region	LOC102900491-LOC109492365		-1	n.236416385G>A
chrA1	236419617	A	G	PASS	intergenic_region	MODIFIER	LOC102900491-LOC109492365	LOC102900491-LOC109492365	intergenic_region	LOC102900491-LOC109492365		-1	n.236419617A>G
chrA1	236421498	C	T	PASS	intergenic_region	MODIFIER	LOC102900491-LOC109492365	LOC102900491-LOC109492365	intergenic_region	LOC102900491-LOC109492365		-1	n.236421498C>T
chrA1	236426697	G	A	PASS	intergenic_region	MODIFIER	LOC102900491-LOC109492365	LOC102900491-LOC109492365	intergenic_region	LOC102900491-LOC109492365		-1	n.236426697G>A
chrA1	236429109	C	T	PASS	intergenic_region	MODIFIER	LOC102900491-LOC109492365	LOC102900491-LOC109492365	intergenic_region	LOC102900491-LOC109492365		-1	n.236429109C>T
chrA1	236747094	T	C	PASS	intergenic_region	MODIFIER	LOC109493157-IRX1	LOC109493157-IRX1	intergenic_region	LOC109493157-IRX1		-1	n.236747094T>C
chrA1	236793706	G	A	PASS	intergenic_region	MODIFIER	LOC109493157-IRX1	LOC109493157-IRX1	intergenic_region	LOC109493157-IRX1		-1	n.236793706G>A
chrA1	236820232	G	T	PASS	intergenic_region	MODIFIER	LOC109493157-IRX1	LOC109493157-IRX1	intergenic_region	LOC109493157-IRX1		-1	n.236820232G>T
chrA1	236863734	T	C	PASS	intergenic_region	MODIFIER	LOC111556665-LOC111558276	LOC111556665-LOC111558276	intergenic_region	LOC111556665-LOC111558276		-1	n.236863734T>C
chrA1	236889803	C	T	PASS	intergenic_region	MODIFIER	LOC111556665-LOC111558276	LOC111556665-LOC111558276	intergenic_region	LOC111556665-LOC111558276		-1	n.236889803C>T
chrA1	236975703	T	C	PASS	intergenic_region	MODIFIER	LOC111556665-LOC111558276	LOC111556665-LOC111558276	intergenic_region	LOC111556665-LOC111558276		-1	n.236975703T>C
chrA1	237147927	C	A	PASS	intergenic_region	MODIFIER	LOC111556665-LOC111558276	LOC111556665-LOC111558276	intergenic_region	LOC111556665-LOC111558276		-1	n.237147927C>A
chrA1	237978018	C	A	PASS	intergenic_region	MODIFIER	LOC123380593-LOC123380594	LOC123380593-LOC123380594	intergenic_region	LOC123380593-LOC123380594		-1	n.237978018C>A
chrA1	238021870	G	A	PASS	upstream_gene_variant	MODIFIER	LOC109493163	LOC109493163	transcript	XR_002147236.3	pseudogene	-1	n.-2428C>T
chrA1	238165731	C	T	PASS	intron_variant	MODIFIER	LOC123379852	LOC123379852	transcript	XM_045036599.1	protein_coding	3	c.202-332C>T
chrA1	238210611	G	A	PASS	intergenic_region	MODIFIER	IRX4-NDUFS6	IRX4-NDUFS6	intergenic_region	IRX4-NDUFS6		-1	n.238210611G>A
chrA1	238679063	G	A	PASS	upstream_gene_variant	MODIFIER	SLC12A7	SLC12A7	transcript	XM_023239878.2	protein_coding	-1	c.-2239G>A
chrA1	238959016	T	C	PASS	non_coding_transcript_exon_variant	MODIFIER	LOC109492485	LOC109492485	transcript	XR_002146377.3	pseudogene	1	n.12A>G
chrA1	238959019	C	CT	PASS	non_coding_transcript_exon_variant	MODIFIER	LOC109492485	LOC109492485	transcript	XR_002146377.3	pseudogene	1	n.8dupA
chrA1	238959022	C	CTTT	PASS	non_coding_transcript_exon_variant	MODIFIER	LOC109492485	LOC109492485	transcript	XR_002146377.3	pseudogene	1	n.5_6insAAA
chrA2	84151	C	T	PASS	3_prime_UTR_variant	MODIFIER	C2CD4C	C2CD4C	transcript	XM_023242412.2	protein_coding	2	c.*915G>A
chrA2	220784	C	CG	PASS	upstream_gene_variant	MODIFIER	LOC123381446	LOC123381446	transcript	XR_006588434.1	pseudogene	-1	n.-163_-162insG
chrA2	233278	G	A	PASS	upstream_gene_variant	MODIFIER	POLRMT	POLRMT	transcript	XM_023242462.2	protein_coding	-1	c.-3726C>T
chrA2	281107	AG	A	PASS	intron_variant	MODIFIER	PALM	PALM	transcript	XM_023242580.2	protein_coding	1	c.5+2678delG
chrA2	342300	C	G	PASS	intron_variant	MODIFIER	PTBP1	PTBP1	transcript	XM_045042445.1	protein_coding	1	c.210-1877C>G
chrA2	342951	G	GGC	PASS	intron_variant	MODIFIER	PTBP1	PTBP1	transcript	XM_045042445.1	protein_coding	1	c.210-1226_210-1225insGC
chrA2	346564	C	T	PASS	intron_variant	MODIFIER	PTBP1	PTBP1	transcript	XM_045042445.1	protein_coding	2	c.241-766C>T
chrA2	352613	GTT	G	ReadPosRankSum-2	3_prime_UTR_variant	MODIFIER	PTBP1	PTBP1	transcript	XM_045042445.1	protein_coding	15	c.*364_*365delTT
chrA2	352615	T	TGGGGGGG	PASS	3_prime_UTR_variant	MODIFIER	PTBP1	PTBP1	transcript	XM_045042445.1	protein_coding	15	c.*367_*373dupGGGGGGG
chrA2	368672	A	G	PASS	upstream_gene_variant	MODIFIER	LOC109493422	LOC109493422	transcript	XR_002147655.3	pseudogene	-1	n.-260T>C
chrA2	377866	G	A	PASS	upstream_gene_variant	MODIFIER	CFD	CFD	transcript	XM_023242657.2	protein_coding	-1	c.-3227G>A
chrA2	380977	T	C	PASS	5_prime_UTR_variant	MODIFIER	CFD	CFD	transcript	XM_023242657.2	protein_coding	1	c.-116T>C
chrA2	381138	G	A	PASS	missense_variant	MODERATE	CFD	CFD	transcript	XM_023242657.2	protein_coding	1	c.46G>A	p.Ala16Thr
chrA2	407018	G	C	PASS	intron_variant	MODIFIER	R3HDM4	R3HDM4	transcript	XM_023242652.2	protein_coding	1	c.78-2137C>G
chrA2	409384	C	G	PASS	upstream_gene_variant	MODIFIER	KISS1R	KISS1R	transcript	XM_023242671.2	protein_coding	-1	c.-3126C>G
chrA2	419660	T	C	PASS	missense_variant	MODERATE	LOC102899473	LOC102899473	transcript	XM_045042066.1	protein_coding	3	c.543A>G	p.Ile181Met
chrA2	421139	AC	A	PASS	upstream_gene_variant	MODIFIER	ARID3A	ARID3A	transcript	XM_023242525.2	protein_coding	-1	c.-5373delC
chrA2	422013	C	CG	PASS	upstream_gene_variant	MODIFIER	ARID3A	ARID3A	transcript	XM_023242525.2	protein_coding	-1	c.-4500_-4499insG
chrA2	422456	A	C	PASS	upstream_gene_variant	MODIFIER	ARID3A	ARID3A	transcript	XM_023242525.2	protein_coding	-1	c.-4057A>C
chrA2	423273	C	T	PASS	missense_variant	MODERATE	LOC102899473	LOC102899473	transcript	XM_045042066.1	protein_coding	2	c.155G>A	p.Arg52Lys
chrA2	424674	T	TG	PASS	upstream_gene_variant	MODIFIER	LOC102899473	LOC102899473	transcript	XM_045042066.1	protein_coding	-1	c.-371_-370insC
chrA2	427383	C	T	PASS	upstream_gene_variant	MODIFIER	LOC102899473	LOC102899473	transcript	XM_045042066.1	protein_coding	-1	c.-3079G>A
chrA2	427565	T	A	PASS	upstream_gene_variant	MODIFIER	LOC102899473	LOC102899473	transcript	XM_045042066.1	protein_coding	-1	c.-3261A>T
chrA2	427930	G	T	PASS	missense_variant	MODERATE	ARID3A	ARID3A	transcript	XM_023242525.2	protein_coding	3	c.459G>T	p.Glu153Asp
chrA2	428416	C	A	PASS	upstream_gene_variant	MODIFIER	LOC102899473	LOC102899473	transcript	XM_045042066.1	protein_coding	-1	c.-4112G>T
chrA2	435912	G	A	PASS	intron_variant	MODIFIER	ARID3A	ARID3A	transcript	XM_023242525.2	protein_coding	3	c.747+7694G>A
chrA2	436558	C	CCAG	PASS	intron_variant	MODIFIER	ARID3A	ARID3A	transcript	XM_023242525.2	protein_coding	3	c.748-8067_748-8066insCAG
chrA2	436562	G	A	PASS	intron_variant	MODIFIER	ARID3A	ARID3A	transcript	XM_023242525.2	protein_coding	3	c.748-8063G>A
chrA2	436571	G	A	PASS	intron_variant	MODIFIER	ARID3A	ARID3A	transcript	XM_023242525.2	protein_coding	3	c.748-8054G>A
chrA2	436584	G	T	PASS	intron_variant	MODIFIER	ARID3A	ARID3A	transcript	XM_023242525.2	protein_coding	3	c.748-8041G>T
chrA2	437026	G	A	PASS	intron_variant	MODIFIER	ARID3A	ARID3A	transcript	XM_023242525.2	protein_coding	3	c.748-7599G>A
chrA2	441038	CG	C	PASS	intron_variant	MODIFIER	ARID3A	ARID3A	transcript	XM_023242525.2	protein_coding	3	c.748-3586delG
chrA2	441696	CCGGGGGGCGGGGCCCCG	C	PASS	intron_variant	MODIFIER	ARID3A	ARID3A	transcript	XM_023242525.2	protein_coding	3	c.748-2928_748-2912delCGGGGGGCGGGGCCCCG
chrA2	442051	C	CCG	PASS	intron_variant	MODIFIER	ARID3A	ARID3A	transcript	XM_023242525.2	protein_coding	3	c.748-2574_748-2573insCG
chrA2	448097	C	T	PASS	intron_variant	MODIFIER	ARID3A	ARID3A	transcript	XM_023242525.2	protein_coding	5	c.1004+62C>T
chrA2	453350	CACG	C	PASS	3_prime_UTR_variant	MODIFIER	ARID3A	ARID3A	transcript	XM_023242525.2	protein_coding	9	c.*1338_*1340delACG
chrA2	453355	CCG	C	PASS	3_prime_UTR_variant	MODIFIER	ARID3A	ARID3A	transcript	XM_023242525.2	protein_coding	9	c.*1343_*1344delCG
chrA2	454438	C	T	PASS	3_prime_UTR_variant	MODIFIER	ARID3A	ARID3A	transcript	XM_023242525.2	protein_coding	9	c.*2425C>T
chrA2	456318	G	A	PASS	upstream_gene_variant	MODIFIER	WDR18	WDR18	transcript	XM_011288240.4	protein_coding	-1	c.-3766G>A
chrA2	465477	T	G	PASS	intron_variant	MODIFIER	WDR18	WDR18	transcript	XM_011288240.4	protein_coding	8	c.1099-141T>G
chrA2	469580	C	G	PASS	3_prime_UTR_variant	MODIFIER	WDR18	WDR18	transcript	XM_011288240.4	protein_coding	11	c.*1530C>G
chrA2	478242	G	A	PASS	missense_variant	MODERATE	GRIN3B	GRIN3B	transcript	XM_045042519.1	protein_coding	9	c.2981G>A	p.Arg994Gln
chrA2	478678	C	G	PASS	3_prime_UTR_variant	MODIFIER	TMEM259	TMEM259	transcript	XM_023242706.2	protein_coding	11	c.*503G>C
chrA2	480731	G	GGGGGGGC	PASS	downstream_gene_variant	MODIFIER	GRIN3B	GRIN3B	transcript	XM_045042519.1	protein_coding	-1	c.*2272_*2273insGGGGGGC
chrA2	481690	G	A	PASS	splice_region_variant&intron_variant	LOW	TMEM259	TMEM259	transcript	XM_023242706.2	protein_coding	3	c.598+4C>T
chrA2	482798	G	A	PASS	upstream_gene_variant	MODIFIER	LOC111559689	LOC111559689	transcript	XR_002740797.2	snRNA	-1	n.-4197G>A
chrA2	485236	CTGG	C	PASS	upstream_gene_variant	MODIFIER	LOC111559689	LOC111559689	transcript	XR_002740797.2	snRNA	-1	n.-1758_-1756delTGG
chrA2	487929	A	AAAGAAAGAAAGAAAG	PASS	upstream_gene_variant	MODIFIER	TMEM259	TMEM259	transcript	XM_023242706.2	protein_coding	-1	c.-1465_-1464insCTTTCTTTCTTTCTT
chrA2	493881	G	T	PASS	intron_variant	MODIFIER	LOC111557541	LOC111557541	transcript	XM_045042572.1	protein_coding	2	c.842-99G>T
chrA2	500076	G	GCAGGGGTGGGGTCTGGGCCTGCCCACAGGGC	PASS	upstream_gene_variant	MODIFIER	CNN2	CNN2	transcript	XM_045042592.1	protein_coding	-1	c.-2788_-2787insCAGGGGTGGGGTCTGGGCCTGCCCACAGGGC
chrA2	501178	T	G	PASS	5_prime_UTR_variant	MODIFIER	CNN2	CNN2	transcript	XM_003981601.6	protein_coding	1	c.-14T>G
chrA2	502056	C	T	PASS	upstream_gene_variant	MODIFIER	CNN2	CNN2	transcript	XM_045042592.1	protein_coding	-1	c.-808C>T
chrA2	503734	AGC	A	PASS	intron_variant	MODIFIER	CNN2	CNN2	transcript	XM_045042592.1	protein_coding	1	c.120+752_120+753delGC
chrA2	510605	T	C	PASS	5_prime_UTR_premature_start_codon_gain_variant	LOW	ABCA7	ABCA7	transcript	XM_045042071.1	protein_coding	1	c.-428T>C
chrA2	511558	G	A	PASS	synonymous_variant	LOW	ABCA7	ABCA7	transcript	XM_045042071.1	protein_coding	5	c.231G>A	p.Ala77Ala
chrA2	522386	G	A	PASS	missense_variant	MODERATE	ABCA7	ABCA7	transcript	XM_045042071.1	protein_coding	46	c.4952G>A	p.Arg1651His
chrA2	525485	T	TGTGC	PASS	upstream_gene_variant	MODIFIER	ARHGAP45	ARHGAP45	transcript	XM_023242736.2	protein_coding	-1	c.-1687_-1686insGTGC
chrA2	528055	C	T	PASS	missense_variant	MODERATE	ARHGAP45	ARHGAP45	transcript	XM_023242736.2	protein_coding	2	c.182C>T	p.Thr61Met
chrA2	529641	G	A	PASS	downstream_gene_variant	MODIFIER	ABCA7	ABCA7	transcript	XM_045042071.1	protein_coding	-1	c.*4484G>A
chrA2	545244	C	T	PASS	3_prime_UTR_variant	MODIFIER	POLR2E	POLR2E	transcript	XM_045042605.1	protein_coding	3	c.*1066G>A
chrA2	548234	C	T	PASS	5_prime_UTR_variant	MODIFIER	POLR2E	POLR2E	transcript	XM_045042605.1	protein_coding	1	c.-43G>A
chrA2	587829	G	A	PASS	intron_variant	MODIFIER	SBNO2	SBNO2	transcript	XM_045042616.1	protein_coding	4	c.306+435C>T
chrA2	607882	G	A	PASS	upstream_gene_variant	MODIFIER	SBNO2	SBNO2	transcript	XM_045042616.1	protein_coding	-1	c.-1331C>T
chrA2	664024	T	TGGGGGGGGGGGG	PASS	3_prime_UTR_variant	MODIFIER	MIDN	MIDN	transcript	XM_023242804.2	protein_coding	9	c.*38_*39insGGGGGGGGGGGG
chrA2	668361	G	A	PASS	upstream_gene_variant	MODIFIER	CIRBP	CIRBP	transcript	XM_006928167.5	protein_coding	-1	c.-4359G>A
chrA2	1070816	G	A	PASS	intron_variant	MODIFIER	ONECUT3	ONECUT3	transcript	XM_023241230.2	protein_coding	1	c.1199-2275G>A
chrA2	1089341	G	T	PASS	intron_variant	MODIFIER	ATP8B3	ATP8B3	transcript	XM_023243212.2	protein_coding	13	c.1082+26C>A
chrA2	1238211	C	T	PASS	intron_variant	MODIFIER	BTBD2	BTBD2	transcript	XM_023243308.2	protein_coding	2	c.543-769G>A
chrA2	1328612	G	A	PASS	intron_variant	MODIFIER	AP3D1	AP3D1	transcript	XM_023243317.2	protein_coding	17	c.2002-103C>T
chrA2	1362581	CTTTCTTTCTTTCTT	C	PASS	intergenic_region	MODIFIER	AP3D1-DOT1L	AP3D1-DOT1L	intergenic_region	AP3D1-DOT1L		-1	n.1362582_1362595delTTTCTTTCTTTCTT
chrA2	1435992	C	T	PASS	missense_variant	MODERATE	DOT1L	DOT1L	transcript	XM_023243349.2	protein_coding	24	c.3341C>T	p.Ser1114Leu
chrA2	1672236	A	G	PASS	intron_variant	MODIFIER	GNG7	GNG7	transcript	XM_023243428.2	protein_coding	2	c.-38-13847T>C
chrA2	1707441	T	C	PASS	upstream_gene_variant	MODIFIER	LOC109493597	LOC109493597	transcript	XR_002147870.3	pseudogene	-1	n.-3723T>C
chrA2	1729826	C	A	PASS	intron_variant	MODIFIER	GNG7	GNG7	transcript	XM_023243428.2	protein_coding	2	c.-39+12219G>T
chrA2	2310567	G	GACCGGGGGA	PASS	upstream_gene_variant	MODIFIER	TLE6	TLE6	transcript	XM_045043364.1	protein_coding	-1	c.-843_-842insACCGGGGGA
chrA2	2497126	C	A	PASS	upstream_gene_variant	MODIFIER	CELF5	CELF5	transcript	XM_023243647.2	protein_coding	-1	c.-72C>A
chrA2	2512599	C	T	PASS	intron_variant	MODIFIER	CELF5	CELF5	transcript	XM_023243647.2	protein_coding	1	c.260-4893C>T
chrA2	2529046	TCC	T	PASS	intron_variant	MODIFIER	CELF5	CELF5	transcript	XM_023243647.2	protein_coding	3	c.395-1021_395-1020delCC
chrA2	2580688	G	A	PASS	upstream_gene_variant	MODIFIER	LOC123381722	LOC123381722	transcript	XR_006589071.1	pseudogene	-1	n.-682C>T
chrA2	2736843	C	T	PASS	intron_variant	MODIFIER	HMG20B	HMG20B	transcript	XM_023243715.2	protein_coding	5	c.472+18C>T
chrA2	2738091	G	C	PASS	upstream_gene_variant	MODIFIER	GIPC3	GIPC3	transcript	XM_045043586.1	protein_coding	-1	c.-4800G>C
chrA2	2740419	G	A	PASS	upstream_gene_variant	MODIFIER	GIPC3	GIPC3	transcript	XM_045043586.1	protein_coding	-1	c.-2472G>A
chrA2	2740499	C	T	PASS	upstream_gene_variant	MODIFIER	GIPC3	GIPC3	transcript	XM_045043586.1	protein_coding	-1	c.-2392C>T
chrA2	2772204	C	T	PASS	intron_variant	MODIFIER	CACTIN	CACTIN	transcript	XM_045043599.1	protein_coding	3	c.775-867G>A
chrA2	2791077	G	A	PASS	intron_variant	MODIFIER	PIP5K1C	PIP5K1C	transcript	XM_023243747.2	protein_coding	12	c.1507+54C>T
chrA2	2875869	G	A	PASS	5_prime_UTR_variant	MODIFIER	RAX2	RAX2	transcript	XM_023243834.2	protein_coding	1	c.-310C>T
chrA2	2911811	AC	A	PASS	intron_variant	MODIFIER	ZFR2	ZFR2	transcript	XM_023243780.2	protein_coding	8	c.1404+418delG
chrA2	2912079	G	A	PASS	intron_variant	MODIFIER	ZFR2	ZFR2	transcript	XM_023243780.2	protein_coding	8	c.1404+151C>T
chrA2	2942669	G	A	PASS	upstream_gene_variant	MODIFIER	ZFR2	ZFR2	transcript	XM_023243780.2	protein_coding	-1	c.-4514C>T
chrA2	3249872	C	CG	PASS	downstream_gene_variant	MODIFIER	MPND	MPND	transcript	XM_023243995.2	protein_coding	-1	c.*2093_*2094insG
chrA2	3650574	C	T	PASS	upstream_gene_variant	MODIFIER	ARRDC5	ARRDC5	transcript	XM_019816023.3	protein_coding	-1	c.-2441G>A
chrA2	4139963	C	T	PASS	upstream_gene_variant	MODIFIER	SAFB2	SAFB2	transcript	XM_003981706.6	protein_coding	-1	c.-2564G>A
chrA2	4548380	G	GGGGGGGGGGGGGGTGA	PASS	intron_variant	MODIFIER	LOC102900010	LOC102900010	transcript	XM_045044510.1	protein_coding	10	c.1412+34_1412+35insGGGGGGGGGGGGGTGA
chrA2	4744898	G	A	PASS	missense_variant	MODERATE	SLC25A23	SLC25A23	transcript	XM_023244217.2	protein_coding	9	c.1090C>T	p.Leu364Phe
chrA2	5010535	G	A	PASS	synonymous_variant	LOW	LOC101088468	LOC101088468	transcript	XM_045044739.1	protein_coding	21	c.2634C>T	p.Thr878Thr
chrA2	5382923	G	A	PASS	intergenic_region	MODIFIER	LOC101092166-ACTL9	LOC101092166-ACTL9	intergenic_region	LOC101092166-ACTL9		-1	n.5382923G>A
chrA2	5383866	GGAAAGAAAGAAGGAAGGAAA	G	PASS	intergenic_region	MODIFIER	LOC101092166-ACTL9	LOC101092166-ACTL9	intergenic_region	LOC101092166-ACTL9		-1	n.5383867_5383886delGAAAGAAAGAAGGAAGGAAA
chrA2	5466242	G	A	PASS	intron_variant	MODIFIER	LOC102902512	LOC102902512	transcript	XR_006589741.1	pseudogene	7	n.4808-8796C>T
chrA2	5577834	G	A	PASS	synonymous_variant	LOW	MARCHF2	MARCHF2	transcript	XM_023244497.2	protein_coding	5	c.735C>T	p.Pro245Pro
chrA2	5742239	G	GGCGGGGGGGGGGGGGGGGCGGGGTTATCA	PASS	intergenic_region	MODIFIER	LOC109494021-FBN3	LOC109494021-FBN3	intergenic_region	LOC109494021-FBN3		-1	n.5742239_5742240insGCGGGGGGGGGGGGGGGGCGGGGTTATCA
chrA2	5743498	GC	G	PASS	intergenic_region	MODIFIER	LOC109494021-FBN3	LOC109494021-FBN3	intergenic_region	LOC109494021-FBN3		-1	n.5743499delC
chrA2	5924625	G	A	PASS	intron_variant	MODIFIER	LOC123382053	LOC123382053	transcript	XR_006589819.1	pseudogene	1	n.285+110G>A
chrA2	5961293	G	A	PASS	missense_variant	MODERATE	TGFBR3L	TGFBR3L	transcript	XM_045042113.1	protein_coding	5	c.1159C>T	p.Arg387Cys
chrA2	5983844	G	A	PASS	upstream_gene_variant	MODIFIER	LRRC8E	LRRC8E	transcript	XM_045045044.1	protein_coding	-1	c.-1878C>T
chrA2	6108458	G	A	PASS	missense_variant	MODERATE	MCEMP1	MCEMP1	transcript	XM_023244712.2	protein_coding	4	c.380C>T	p.Ser127Phe
chrA2	6122685	C	T	PASS	intergenic_region	MODIFIER	RETN-STXBP2	RETN-STXBP2	intergenic_region	RETN-STXBP2		-1	n.6122685C>T
chrA2	6124630	TG	T	PASS	intergenic_region	MODIFIER	RETN-STXBP2	RETN-STXBP2	intergenic_region	RETN-STXBP2		-1	n.6124631delG
chrA2	6125143	GGTAAC	G	PASS	downstream_gene_variant	MODIFIER	STXBP2	STXBP2	transcript	XM_003981805.5	protein_coding	-1	c.*4582_*4586delGTTAC
chrA2	6125150	A	G	PASS	downstream_gene_variant	MODIFIER	STXBP2	STXBP2	transcript	XM_003981805.5	protein_coding	-1	c.*4580T>C
chrA2	6133220	GA	G	PASS	intron_variant	MODIFIER	STXBP2	STXBP2	transcript	XM_003981805.5	protein_coding	13	c.1107+33delT
chrA2	6139890	G	C	PASS	upstream_gene_variant	MODIFIER	STXBP2	STXBP2	transcript	XM_003981805.5	protein_coding	-1	c.-1926C>G
chrA2	6198967	G	A	PASS	intron_variant	MODIFIER	PNPLA6	PNPLA6	transcript	XM_023244804.2	protein_coding	28	c.3706-402C>T
chrA2	6302135	C	T	PASS	intron_variant	MODIFIER	ARHGEF18	ARHGEF18	transcript	XM_045053098.1	protein_coding	10	c.967+17374G>A
chrA2	6437632	GTTATTA	G	PASS	intron_variant	MODIFIER	INSR	INSR	transcript	XM_023244792.2	protein_coding	2	c.652+30345_652+30350delTTATTA
chrA2	6730173	G	GA	PASS	intron_variant	MODIFIER	MUC16	MUC16	transcript	XM_045053094.1	protein_coding	4	c.24196+194_24196+195insT
chrA2	6788274	C	T	PASS	intergenic_region	MODIFIER	MUC16-LOC101082294	MUC16-LOC101082294	intergenic_region	MUC16-LOC101082294		-1	n.6788274C>T
chrA2	6847019	G	GAA	PASS	downstream_gene_variant	MODIFIER	LOC101098693	LOC101098693	transcript	XM_003981814.4	protein_coding	-1	c.*2588_*2589insTT
chrA2	6920436	G	A	PASS	synonymous_variant	LOW	LOC101083828	LOC101083828	transcript	XM_011289502.3	protein_coding	1	c.244C>T	p.Leu82Leu
chrA2	7201564	TCGCG	T	PASS	intron_variant	MODIFIER	LOC101086373	LOC101086373	transcript	XM_045053124.1	protein_coding	1	c.-53-4103_-53-4100delCGCG
chrA2	7251566	G	GTCCTAATTGAGGCTCAGTTCAATTAAGGTTTATGGACTTCCTCTCACCCCGGCAAAGGA	PASS	intron_variant	MODIFIER	LOC101086878	LOC101086878	transcript	XM_023244958.2	protein_coding	2	c.84-1356_84-1355insTCCTTTGCCGGGGTGAGAGGAAGTCCATAAACCTTAATTGAACTGAGCCTCAATTAGGA
chrA2	7272334	G	T	PASS	upstream_gene_variant	MODIFIER	LOC101099693	LOC101099693	transcript	XM_003981818.4	protein_coding	-1	c.-2552C>A
chrA2	7807638	C	T	PASS	upstream_gene_variant	MODIFIER	ICAM3	ICAM3	transcript	XM_045045395.1	protein_coding	-1	c.-4606G>A
chrA2	8045217	C	CA	PASS	downstream_gene_variant	MODIFIER	ILF3	ILF3	transcript	XM_023245358.2	protein_coding	-1	c.*5028_*5029insA
chrA2	8125790	A	C	PASS	intron_variant	MODIFIER	DNM2	DNM2	transcript	XM_023245382.2	protein_coding	5	c.689-467A>C
chrA2	8309601	G	A	PASS	intron_variant	MODIFIER	SMARCA4	SMARCA4	transcript	XM_019817553.3	protein_coding	11	c.1812+515G>A
chrA2	8773911	G	A	PASS	upstream_gene_variant	MODIFIER	LOC102899880	LOC102899880	transcript	XM_045045879.1	protein_coding	-1	c.-4846C>T
chrA2	8778344	T	C	PASS	intergenic_region	MODIFIER	LOC102899880-LOC111558082	LOC102899880-LOC111558082	intergenic_region	LOC102899880-LOC111558082		-1	n.8778344T>C
chrA2	8817535	A	T	PASS	intron_variant	MODIFIER	LOC101082380	LOC101082380	transcript	XM_019817923.3	protein_coding	1	c.4-2204T>A
chrA2	8821231	G	A	PASS	intron_variant	MODIFIER	LOC101082380	LOC101082380	transcript	XM_019817923.3	protein_coding	1	c.4-5900C>T
chrA2	8821351	T	C	PASS	intron_variant	MODIFIER	LOC101082380	LOC101082380	transcript	XM_019817923.3	protein_coding	1	c.4-6020A>G
chrA2	8822288	CT	C	PASS	intron_variant	MODIFIER	LOC101082380	LOC101082380	transcript	XM_019817923.3	protein_coding	1	c.4-6958delA
chrA2	8822753	CCA	C	PASS	intron_variant	MODIFIER	LOC101082380	LOC101082380	transcript	XM_019817923.3	protein_coding	1	c.4-7424_4-7423delTG
chrA2	8822914	C	T	PASS	intron_variant	MODIFIER	LOC101082380	LOC101082380	transcript	XM_019817923.3	protein_coding	1	c.4-7583G>A
chrA2	8823099	G	A	PASS	intron_variant	MODIFIER	LOC101082380	LOC101082380	transcript	XM_019817923.3	protein_coding	1	c.4-7768C>T
chrA2	8831322	C	A	PASS	intron_variant	MODIFIER	LOC101082380	LOC101082380	transcript	XM_019817923.3	protein_coding	1	c.3+413G>T
chrA2	8832260	C	T	PASS	upstream_gene_variant	MODIFIER	LOC101082380	LOC101082380	transcript	XM_019817923.3	protein_coding	-1	c.-523G>A
chrA2	8833241	C	T	PASS	upstream_gene_variant	MODIFIER	LOC101082380	LOC101082380	transcript	XM_019817923.3	protein_coding	-1	c.-1504G>A
chrA2	8835420	T	C	PASS	upstream_gene_variant	MODIFIER	LOC101082380	LOC101082380	transcript	XM_019817923.3	protein_coding	-1	c.-3683A>G
chrA2	8835567	G	A	PASS	upstream_gene_variant	MODIFIER	LOC101082380	LOC101082380	transcript	XM_019817923.3	protein_coding	-1	c.-3830C>T
chrA2	8895098	A	G	PASS	intron_variant	MODIFIER	LOC101083149	LOC101083149	transcript	XM_023245737.2	protein_coding	1	c.3+6702A>G
chrA2	9163621	T	G	PASS	downstream_gene_variant	MODIFIER	GADD45GIP1	GADD45GIP1	transcript	XM_023246055.2	protein_coding	-1	c.*2206A>C
chrA2	9163625	T	G	PASS	downstream_gene_variant	MODIFIER	GADD45GIP1	GADD45GIP1	transcript	XM_023246055.2	protein_coding	-1	c.*2202A>C
chrA2	9163629	T	G	PASS	downstream_gene_variant	MODIFIER	GADD45GIP1	GADD45GIP1	transcript	XM_023246055.2	protein_coding	-1	c.*2198A>C
chrA2	9163637	A	G	PASS	downstream_gene_variant	MODIFIER	GADD45GIP1	GADD45GIP1	transcript	XM_023246055.2	protein_coding	-1	c.*2190T>C
chrA2	9163640	T	A	PASS	downstream_gene_variant	MODIFIER	GADD45GIP1	GADD45GIP1	transcript	XM_023246055.2	protein_coding	-1	c.*2187A>T
chrA2	9225490	C	T	PASS	intron_variant	MODIFIER	NFIX	NFIX	transcript	XM_019818198.3	protein_coding	2	c.796+2465C>T
chrA2	9276035	G	GC	PASS	upstream_gene_variant	MODIFIER	LOC123382331	LOC123382331	transcript	XR_006590555.1	pseudogene	-1	n.-1233_-1232insG
chrA2	9408420	G	C	PASS	intron_variant	MODIFIER	CACNA1A	CACNA1A	transcript	XM_045046579.1	protein_coding	32	c.5040+57C>G
chrA2	9408423	G	T	PASS	intron_variant	MODIFIER	CACNA1A	CACNA1A	transcript	XM_045046579.1	protein_coding	32	c.5040+54C>A
chrA2	9467407	A	T	PASS	intron_variant	MODIFIER	CACNA1A	CACNA1A	transcript	XM_045046579.1	protein_coding	8	c.1240-2474T>A
chrA2	9577120	G	A	PASS	intron_variant	MODIFIER	CACNA1A	CACNA1A	transcript	XM_045046579.1	protein_coding	3	c.554+1999C>T
chrA2	9684340	G	A	PASS	intergenic_region	MODIFIER	LOC123382352-YJU2B	LOC123382352-YJU2B	intergenic_region	LOC123382352-YJU2B		-1	n.9684340G>A
chrA2	9685387	C	A	PASS	intergenic_region	MODIFIER	LOC123382352-YJU2B	LOC123382352-YJU2B	intergenic_region	LOC123382352-YJU2B		-1	n.9685387C>A
chrA2	9699207	GCT	G	PASS	intergenic_region	MODIFIER	LOC123382352-YJU2B	LOC123382352-YJU2B	intergenic_region	LOC123382352-YJU2B		-1	n.9699208_9699209delCT
chrA2	9770788	T	G	PASS	downstream_gene_variant	MODIFIER	ZSWIM4	ZSWIM4	transcript	XM_023246142.2	protein_coding	-1	c.*5083T>G
chrA2	9772402	G	A	PASS	intergenic_region	MODIFIER	ZSWIM4-LOC123382366	ZSWIM4-LOC123382366	intergenic_region	ZSWIM4-LOC123382366		-1	n.9772402G>A
chrA2	9773952	G	A	PASS	downstream_gene_variant	MODIFIER	LOC123382366	LOC123382366	transcript	XR_006590639.1	pseudogene	-1	n.*3498C>T
chrA2	9777046	C	T	PASS	downstream_gene_variant	MODIFIER	LOC123382366	LOC123382366	transcript	XR_006590639.1	pseudogene	-1	n.*404G>A
chrA2	9777180	T	C	PASS	downstream_gene_variant	MODIFIER	LOC123382366	LOC123382366	transcript	XR_006590639.1	pseudogene	-1	n.*270A>G
chrA2	9930956	G	A	PASS	downstream_gene_variant	MODIFIER	PALM3	PALM3	transcript	XM_045046845.1	protein_coding	-1	c.*2422C>T
chrA2	9931493	C	T	PASS	downstream_gene_variant	MODIFIER	PALM3	PALM3	transcript	XM_045046845.1	protein_coding	-1	c.*1885G>A
chrA2	9932829	G	A	PASS	3_prime_UTR_variant	MODIFIER	IL27RA	IL27RA	transcript	XM_006928488.5	protein_coding	15	c.*346G>A
chrA2	9933817	TTCTCTGCCTTCAGTGACGCCTCCCCTCCTCTCTCTGCTTCCGACGGCGCCTCACCTCCTCCTTTCTCTGCCCCCAGTGGCGCCTCACCTCCTGTTC	T	PASS	disruptive_inframe_deletion	MODERATE	PALM3	PALM3	transcript	XM_045046845.1	protein_coding	7	c.1697_1792delGAACAGGAGGTGAGGCGCCACTGGGGGCAGAGAAAGGAGGAGGTGAGGCGCCGTCGGAAGCAGAGAGAGGAGGGGAGGCGTCACTGAAGGCAGAGA	p.Arg566_Glu597del
chrA2	9936523	C	T	PASS	upstream_gene_variant	MODIFIER	LOC123382386	LOC123382386	transcript	XR_006590688.1	pseudogene	-1	n.-644C>T
chrA2	9936593	CCACCT	C	PASS	upstream_gene_variant	MODIFIER	LOC123382386	LOC123382386	transcript	XR_006590688.1	pseudogene	-1	n.-573_-569delCACCT
chrA2	9940381	A	AAT	PASS	upstream_gene_variant	MODIFIER	MISP3	MISP3	transcript	XM_023246229.2	protein_coding	-1	c.-7254_-7253insAT
chrA2	9941788	G	A	PASS	upstream_gene_variant	MODIFIER	PALM3	PALM3	transcript	XM_045046845.1	protein_coding	-1	c.-405C>T
chrA2	9942894	C	G	PASS	upstream_gene_variant	MODIFIER	PALM3	PALM3	transcript	XM_045046845.1	protein_coding	-1	c.-1511G>C
chrA2	9944459	G	A	PASS	upstream_gene_variant	MODIFIER	PALM3	PALM3	transcript	XM_045046845.1	protein_coding	-1	c.-3076C>T
chrA2	9944550	G	A	PASS	upstream_gene_variant	MODIFIER	PALM3	PALM3	transcript	XM_045046845.1	protein_coding	-1	c.-3167C>T
chrA2	9948901	C	T	PASS	intron_variant	MODIFIER	MISP3	MISP3	transcript	XM_023246229.2	protein_coding	2	c.642+104C>T
chrA2	9949496	G	A	PASS	downstream_gene_variant	MODIFIER	MISP3	MISP3	transcript	XM_023246229.2	protein_coding	-1	c.*407G>A
chrA2	9949898	A	G	PASS	downstream_gene_variant	MODIFIER	MISP3	MISP3	transcript	XM_023246229.2	protein_coding	-1	c.*809A>G
chrA2	9952163	T	C	PASS	downstream_gene_variant	MODIFIER	MISP3	MISP3	transcript	XM_023246229.2	protein_coding	-1	c.*3074T>C
chrA2	9953020	C	CCAAAAATCTTTGATGAAATCAGAAATTGTCA	PASS	downstream_gene_variant	MODIFIER	MISP3	MISP3	transcript	XM_023246229.2	protein_coding	-1	c.*3931_*3932insCAAAAATCTTTGATGAAATCAGAAATTGTCA
chrA2	9954019	GC	G	PASS	3_prime_UTR_variant	MODIFIER	CA2H19orf67	CA2H19orf67	transcript	XM_006928489.4	protein_coding	6	c.*111delG
chrA2	9954023	C	T	PASS	3_prime_UTR_variant	MODIFIER	CA2H19orf67	CA2H19orf67	transcript	XM_006928489.4	protein_coding	6	c.*108G>A
chrA2	9954674	C	T	PASS	downstream_gene_variant	MODIFIER	SAMD1	SAMD1	transcript	XM_023246248.2	protein_coding	-1	c.*4037G>A
chrA2	9956034	C	T	PASS	downstream_gene_variant	MODIFIER	SAMD1	SAMD1	transcript	XM_023246248.2	protein_coding	-1	c.*2677G>A
chrA2	9957342	C	T	PASS	upstream_gene_variant	MODIFIER	CA2H19orf67	CA2H19orf67	transcript	XM_006928489.4	protein_coding	-1	c.-437G>A
chrA2	9957668	CTACA	C	PASS	upstream_gene_variant	MODIFIER	CA2H19orf67	CA2H19orf67	transcript	XM_006928489.4	protein_coding	-1	c.-767_-764delTGTA
chrA2	9957974	T	C	PASS	upstream_gene_variant	MODIFIER	CA2H19orf67	CA2H19orf67	transcript	XM_006928489.4	protein_coding	-1	c.-1069A>G
chrA2	9959888	C	G	PASS	upstream_gene_variant	MODIFIER	CA2H19orf67	CA2H19orf67	transcript	XM_006928489.4	protein_coding	-1	c.-2983G>C
chrA2	9961421	C	CCCG	PASS	upstream_gene_variant	MODIFIER	CA2H19orf67	CA2H19orf67	transcript	XM_006928489.4	protein_coding	-1	c.-4517_-4516insCGG
chrA2	9961729	G	GGGGGCGGGC	PASS	upstream_gene_variant	MODIFIER	CA2H19orf67	CA2H19orf67	transcript	XM_006928489.4	protein_coding	-1	c.-4825_-4824insGCCCGCCCC
chrA2	9965776	C	A	PASS	upstream_gene_variant	MODIFIER	SAMD1	SAMD1	transcript	XM_023246248.2	protein_coding	-1	c.-4718G>T
chrA2	9970984	G	A	PASS	intron_variant	MODIFIER	PRKACA	PRKACA	transcript	XM_006928490.5	protein_coding	2	c.135+232C>T
chrA2	9973774	T	A	PASS	intron_variant	MODIFIER	PRKACA	PRKACA	transcript	XM_006928490.5	protein_coding	1	c.73+400A>T
chrA2	9974078	G	A	PASS	intron_variant	MODIFIER	PRKACA	PRKACA	transcript	XM_006928490.5	protein_coding	1	c.73+96C>T
chrA2	9977253	C	T	PASS	upstream_gene_variant	MODIFIER	PRKACA	PRKACA	transcript	XM_006928490.5	protein_coding	-1	c.-3007G>A
chrA2	9981898	AGACCTAAAAACT	A	PASS	3_prime_UTR_variant	MODIFIER	ASF1B	ASF1B	transcript	XM_003981937.6	protein_coding	4	c.*556_*567delAGTTTTTAGGTC
chrA2	9982649	C	T	PASS	synonymous_variant	LOW	ASF1B	ASF1B	transcript	XM_003981937.6	protein_coding	4	c.426G>A	p.Ser142Ser
chrA2	9985503	G	A	PASS	splice_region_variant&non_coding_transcript_exon_variant	LOW	LOC123382406	LOC123382406	transcript	XR_006590712.1	pseudogene	2	n.1040G>A
chrA2	9985504	C	A	PASS	intron_variant	MODIFIER	ASF1B	ASF1B	transcript	XM_003981937.6	protein_coding	2	c.225+272G>T
chrA2	9988084	A	G	PASS	upstream_gene_variant	MODIFIER	LOC123382404	LOC123382404	transcript	XR_006590709.1	pseudogene	-1	n.-2702A>G
chrA2	9989241	G	A	PASS	upstream_gene_variant	MODIFIER	LOC123382404	LOC123382404	transcript	XR_006590709.1	pseudogene	-1	n.-1545G>A
chrA2	9993844	GCA	G	PASS	upstream_gene_variant	MODIFIER	ASF1B	ASF1B	transcript	XM_003981937.6	protein_coding	-1	c.-3666_-3665delTG
chrA2	9997788	AT	A	PASS	intron_variant	MODIFIER	LOC123382404	LOC123382404	transcript	XR_006590709.1	pseudogene	1	n.152+6852delT
chrA2	9999043	G	A	PASS	downstream_gene_variant	MODIFIER	ADGRL1	ADGRL1	transcript	XM_023246270.2	protein_coding	-1	c.*7075C>T
chrA2	9999452	ATTAT	A	PASS	downstream_gene_variant	MODIFIER	ADGRL1	ADGRL1	transcript	XM_023246270.2	protein_coding	-1	c.*6662_*6665delATAA
chrA2	10005959	T	C	PASS	3_prime_UTR_variant	MODIFIER	ADGRL1	ADGRL1	transcript	XM_023246270.2	protein_coding	24	c.*159A>G
chrA2	10007460	G	A	PASS	splice_region_variant&intron_variant	LOW	ADGRL1	ADGRL1	transcript	XM_045046880.1	protein_coding	21	c.3533-5C>T
chrA2	10011003	G	A	PASS	synonymous_variant	LOW	ADGRL1	ADGRL1	transcript	XM_023246270.2	protein_coding	16	c.2913C>T	p.Cys971Cys
chrA2	10018917	G	A	PASS	intron_variant	MODIFIER	ADGRL1	ADGRL1	transcript	XM_023246270.2	protein_coding	5	c.410-1588C>T
chrA2	10019027	C	T	PASS	intron_variant	MODIFIER	ADGRL1	ADGRL1	transcript	XM_023246270.2	protein_coding	5	c.410-1698G>A
chrA2	10022225	C	G	PASS	upstream_gene_variant	MODIFIER	LOC123382405	LOC123382405	transcript	XR_006590710.1	pseudogene	-1	n.-2488C>G
chrA2	10022304	C	T	PASS	upstream_gene_variant	MODIFIER	LOC123382405	LOC123382405	transcript	XR_006590710.1	pseudogene	-1	n.-2409C>T
chrA2	10024988	C	T	PASS	intron_variant	MODIFIER	ADGRL1	ADGRL1	transcript	XM_023246270.2	protein_coding	3	c.285-271G>A
chrA2	10026127	C	T	PASS	downstream_gene_variant	MODIFIER	LOC123382405	LOC123382405	transcript	XR_006590710.1	pseudogene	-1	n.*395C>T
chrA2	10026537	G	A	PASS	downstream_gene_variant	MODIFIER	LOC123382405	LOC123382405	transcript	XR_006590710.1	pseudogene	-1	n.*805G>A
chrA2	10027927	G	A	PASS	missense_variant	MODERATE	ADGRL1	ADGRL1	transcript	XM_045046873.1	protein_coding	2	c.14C>T	p.Thr5Met
chrA2	10030836	G	A	PASS	intron_variant	MODIFIER	ADGRL1	ADGRL1	transcript	XM_023246270.2	protein_coding	2	c.70+162C>T
chrA2	10032461	A	G	PASS	upstream_gene_variant	MODIFIER	ADGRL1	ADGRL1	transcript	XM_045046873.1	protein_coding	-1	c.-1581T>C
chrA2	10033595	T	A	PASS	upstream_gene_variant	MODIFIER	ADGRL1	ADGRL1	transcript	XM_045046873.1	protein_coding	-1	c.-2715A>T
chrA2	10035383	T	A	PASS	upstream_gene_variant	MODIFIER	ADGRL1	ADGRL1	transcript	XM_045046873.1	protein_coding	-1	c.-4503A>T
chrA2	10035553	T	C	PASS	upstream_gene_variant	MODIFIER	ADGRL1	ADGRL1	transcript	XM_045046873.1	protein_coding	-1	c.-4673A>G
chrA2	10036212	G	A	PASS	intron_variant	MODIFIER	ADGRL1	ADGRL1	transcript	XM_023246270.2	protein_coding	1	c.-95-5050C>T
chrA2	10036394	G	A	PASS	intron_variant	MODIFIER	ADGRL1	ADGRL1	transcript	XM_023246270.2	protein_coding	1	c.-95-5232C>T
chrA2	10037364	T	A	PASS	intron_variant	MODIFIER	ADGRL1	ADGRL1	transcript	XM_023246270.2	protein_coding	1	c.-95-6202A>T
chrA2	10037455	G	A	PASS	intron_variant	MODIFIER	ADGRL1	ADGRL1	transcript	XM_023246270.2	protein_coding	1	c.-95-6293C>T
chrA2	10037799	C	A	PASS	intron_variant	MODIFIER	ADGRL1	ADGRL1	transcript	XM_023246270.2	protein_coding	1	c.-95-6637G>T
chrA2	10040552	T	C	PASS	intron_variant	MODIFIER	ADGRL1	ADGRL1	transcript	XM_023246270.2	protein_coding	1	c.-96+7154A>G
chrA2	10042205	TGTGTGTGTGTGTGTGTGTGTGTGTGTGTGC	T	PASS	intron_variant	MODIFIER	ADGRL1	ADGRL1	transcript	XM_023246270.2	protein_coding	1	c.-96+5471_-96+5500delGCACACACACACACACACACACACACACAC
chrA2	10043834	G	A	PASS	intron_variant	MODIFIER	ADGRL1	ADGRL1	transcript	XM_023246270.2	protein_coding	1	c.-96+3872C>T
chrA2	10044126	C	T	PASS	intron_variant	MODIFIER	ADGRL1	ADGRL1	transcript	XM_023246270.2	protein_coding	1	c.-96+3580G>A
chrA2	10044818	C	T	PASS	intron_variant	MODIFIER	ADGRL1	ADGRL1	transcript	XM_023246270.2	protein_coding	1	c.-96+2888G>A
chrA2	10047602	G	A	PASS	intron_variant	MODIFIER	ADGRL1	ADGRL1	transcript	XM_023246270.2	protein_coding	1	c.-96+104C>T
chrA2	10047675	TC	T	PASS	intron_variant	MODIFIER	ADGRL1	ADGRL1	transcript	XM_023246270.2	protein_coding	1	c.-96+30delG
chrA2	10052254	G	A	PASS	upstream_gene_variant	MODIFIER	ADGRL1	ADGRL1	transcript	XM_023246270.2	protein_coding	-1	c.-4644C>T
chrA2	10052344	C	A	PASS	upstream_gene_variant	MODIFIER	ADGRL1	ADGRL1	transcript	XM_023246270.2	protein_coding	-1	c.-4734G>T
chrA2	10052907	C	T	PASS	intergenic_region	MODIFIER	ADGRL1-LOC123382411	ADGRL1-LOC123382411	intergenic_region	ADGRL1-LOC123382411		-1	n.10052907C>T
chrA2	10053067	C	T	PASS	intergenic_region	MODIFIER	ADGRL1-LOC123382411	ADGRL1-LOC123382411	intergenic_region	ADGRL1-LOC123382411		-1	n.10053067C>T
chrA2	10056547	C	T	PASS	intergenic_region	MODIFIER	ADGRL1-LOC123382411	ADGRL1-LOC123382411	intergenic_region	ADGRL1-LOC123382411		-1	n.10056547C>T
chrA2	10059613	C	T	PASS	intergenic_region	MODIFIER	ADGRL1-LOC123382411	ADGRL1-LOC123382411	intergenic_region	ADGRL1-LOC123382411		-1	n.10059613C>T
chrA2	10060829	C	T	PASS	intergenic_region	MODIFIER	ADGRL1-LOC123382411	ADGRL1-LOC123382411	intergenic_region	ADGRL1-LOC123382411		-1	n.10060829C>T
chrA2	10061958	G	A	PASS	intergenic_region	MODIFIER	ADGRL1-LOC123382411	ADGRL1-LOC123382411	intergenic_region	ADGRL1-LOC123382411		-1	n.10061958G>A
chrA2	10064242	C	T	PASS	intergenic_region	MODIFIER	ADGRL1-LOC123382411	ADGRL1-LOC123382411	intergenic_region	ADGRL1-LOC123382411		-1	n.10064242C>T
chrA2	10065027	C	T	PASS	intergenic_region	MODIFIER	ADGRL1-LOC123382411	ADGRL1-LOC123382411	intergenic_region	ADGRL1-LOC123382411		-1	n.10065027C>T
chrA2	10065884	T	G	PASS	intergenic_region	MODIFIER	ADGRL1-LOC123382411	ADGRL1-LOC123382411	intergenic_region	ADGRL1-LOC123382411		-1	n.10065884T>G
chrA2	10067566	G	T	PASS	intergenic_region	MODIFIER	ADGRL1-LOC123382411	ADGRL1-LOC123382411	intergenic_region	ADGRL1-LOC123382411		-1	n.10067566G>T
chrA2	10067619	C	G	PASS	intergenic_region	MODIFIER	ADGRL1-LOC123382411	ADGRL1-LOC123382411	intergenic_region	ADGRL1-LOC123382411		-1	n.10067619C>G
chrA2	10067640	T	C	PASS	intergenic_region	MODIFIER	ADGRL1-LOC123382411	ADGRL1-LOC123382411	intergenic_region	ADGRL1-LOC123382411		-1	n.10067640T>C
chrA2	10069121	C	G	PASS	intergenic_region	MODIFIER	ADGRL1-LOC123382411	ADGRL1-LOC123382411	intergenic_region	ADGRL1-LOC123382411		-1	n.10069121C>G
chrA2	10072134	G	C	PASS	intergenic_region	MODIFIER	ADGRL1-LOC123382411	ADGRL1-LOC123382411	intergenic_region	ADGRL1-LOC123382411		-1	n.10072134G>C
chrA2	10072350	C	T	PASS	intergenic_region	MODIFIER	ADGRL1-LOC123382411	ADGRL1-LOC123382411	intergenic_region	ADGRL1-LOC123382411		-1	n.10072350C>T
chrA2	10073095	A	ACTT	PASS	intergenic_region	MODIFIER	ADGRL1-LOC123382411	ADGRL1-LOC123382411	intergenic_region	ADGRL1-LOC123382411		-1	n.10073095_10073096insCTT
chrA2	10145468	AGT	A	PASS	intron_variant	MODIFIER	LOC123382411	LOC123382411	transcript	XR_006590726.1	pseudogene	2	n.674+2930_674+2931delAC
chrA2	10272929	G	C	PASS	intron_variant	MODIFIER	TECR	TECR	transcript	XM_003981940.5	protein_coding	1	c.15+7183G>C
chrA2	10275576	C	T	PASS	upstream_gene_variant	MODIFIER	TECR	TECR	transcript	XM_019818545.2	protein_coding	-1	c.-3857C>T
chrA2	10276542	C	T	PASS	upstream_gene_variant	MODIFIER	TECR	TECR	transcript	XM_019818545.2	protein_coding	-1	c.-2891C>T
chrA2	10277053	AAG	A	PASS	upstream_gene_variant	MODIFIER	TECR	TECR	transcript	XM_019818545.2	protein_coding	-1	c.-2379_-2378delAG
chrA2	10277155	C	T	PASS	upstream_gene_variant	MODIFIER	TECR	TECR	transcript	XM_019818545.2	protein_coding	-1	c.-2278C>T
chrA2	10284226	CATTT	C	PASS	intron_variant	MODIFIER	LOC102899774	LOC102899774	transcript	XR_002149524.3	pseudogene	1	n.3856+435_3856+438delAAAT
chrA2	10288944	C	T	PASS	upstream_gene_variant	MODIFIER	LOC102899774	LOC102899774	transcript	XR_002149524.3	pseudogene	-1	n.-424G>A
chrA2	10296158	A	G	PASS	upstream_gene_variant	MODIFIER	NDUFB7	NDUFB7	transcript	XM_003981941.4	protein_coding	-1	c.-1541T>C
chrA2	10321758	A	G	PASS	downstream_gene_variant	MODIFIER	CLEC17A	CLEC17A	transcript	XM_045047105.1	protein_coding	-1	c.*5179A>G
chrA2	10364538	C	T	PASS	intron_variant	MODIFIER	ADGRE3	ADGRE3	transcript	XM_023246420.2	protein_coding	2	c.25+2802G>A
chrA2	10365650	A	AT	PASS	intron_variant	MODIFIER	ADGRE3	ADGRE3	transcript	XM_023246420.2	protein_coding	2	c.25+1689_25+1690insA
chrA2	10365695	A	G	PASS	intron_variant	MODIFIER	ADGRE3	ADGRE3	transcript	XM_023246420.2	protein_coding	2	c.25+1645T>C
chrA2	10369871	CATCT	C	PASS	intron_variant	MODIFIER	ADGRE3	ADGRE3	transcript	XM_023246420.2	protein_coding	1	c.-75-2436_-75-2433delAGAT
chrA2	10371222	G	A	PASS	intron_variant	MODIFIER	ADGRE3	ADGRE3	transcript	XM_023246420.2	protein_coding	1	c.-75-3783C>T
chrA2	10375676	G	A	PASS	upstream_gene_variant	MODIFIER	ZNF333	ZNF333	transcript	XM_023246457.2	protein_coding	-1	c.-2037G>A
chrA2	10377833	A	ACCCCCCCCCCC	PASS	upstream_gene_variant	MODIFIER	ADGRE3	ADGRE3	transcript	XM_023246420.2	protein_coding	-1	c.-463_-462insGGGGGGGGGGG
chrA2	10378369	T	C	PASS	upstream_gene_variant	MODIFIER	ADGRE3	ADGRE3	transcript	XM_023246420.2	protein_coding	-1	c.-998A>G
chrA2	10378373	T	C	PASS	upstream_gene_variant	MODIFIER	ADGRE3	ADGRE3	transcript	XM_023246420.2	protein_coding	-1	c.-1002A>G
chrA2	10381203	A	C	PASS	upstream_gene_variant	MODIFIER	ADGRE3	ADGRE3	transcript	XM_023246420.2	protein_coding	-1	c.-3832T>G
chrA2	10381296	T	G	PASS	upstream_gene_variant	MODIFIER	ADGRE3	ADGRE3	transcript	XM_023246420.2	protein_coding	-1	c.-3925A>C
chrA2	10381857	G	A	PASS	upstream_gene_variant	MODIFIER	ADGRE3	ADGRE3	transcript	XM_023246420.2	protein_coding	-1	c.-4486C>T
chrA2	10382455	G	C	PASS	upstream_gene_variant	MODIFIER	ADGRE3	ADGRE3	transcript	XM_023246420.2	protein_coding	-1	c.-5084C>G
chrA2	10385311	G	A	PASS	intron_variant	MODIFIER	ZNF333	ZNF333	transcript	XM_023246457.2	protein_coding	4	c.210+693G>A
chrA2	10388431	G	A	PASS	intron_variant	MODIFIER	ZNF333	ZNF333	transcript	XM_023246457.2	protein_coding	5	c.328-97G>A
chrA2	10388486	A	G	PASS	intron_variant	MODIFIER	ZNF333	ZNF333	transcript	XM_023246457.2	protein_coding	5	c.328-42A>G
chrA2	10388539	G	T	PASS	synonymous_variant	LOW	ZNF333	ZNF333	transcript	XM_023246457.2	protein_coding	6	c.339G>T	p.Ala113Ala
chrA2	10389324	C	T	PASS	intron_variant	MODIFIER	ZNF333	ZNF333	transcript	XM_023246457.2	protein_coding	6	c.415+709C>T
chrA2	10389691	G	A	PASS	intron_variant	MODIFIER	ZNF333	ZNF333	transcript	XM_023246457.2	protein_coding	6	c.415+1076G>A
chrA2	10390145	C	T	PASS	intron_variant	MODIFIER	ZNF333	ZNF333	transcript	XM_023246457.2	protein_coding	6	c.415+1530C>T
chrA2	10390326	C	T	PASS	intron_variant	MODIFIER	ZNF333	ZNF333	transcript	XM_023246457.2	protein_coding	6	c.415+1711C>T
chrA2	10391067	G	A	PASS	intron_variant	MODIFIER	ZNF333	ZNF333	transcript	XM_023246457.2	protein_coding	6	c.415+2452G>A
chrA2	10393631	C	T	PASS	intron_variant	MODIFIER	ZNF333	ZNF333	transcript	XM_023246457.2	protein_coding	6	c.416-2175C>T
chrA2	10394077	TGGA	T	PASS	intron_variant	MODIFIER	ZNF333	ZNF333	transcript	XM_023246457.2	protein_coding	6	c.416-1728_416-1726delGGA
chrA2	10394761	C	T	PASS	intron_variant	MODIFIER	ZNF333	ZNF333	transcript	XM_023246457.2	protein_coding	6	c.416-1045C>T
chrA2	10395589	G	A	PASS	upstream_gene_variant	MODIFIER	LOC123382437	LOC123382437	transcript	XR_006590805.1	pseudogene	-1	n.-4716G>A
chrA2	10396958	T	C	PASS	upstream_gene_variant	MODIFIER	LOC123382437	LOC123382437	transcript	XR_006590805.1	pseudogene	-1	n.-3347T>C
chrA2	10404044	G	A	PASS	downstream_gene_variant	MODIFIER	ZNF333	ZNF333	transcript	XM_023246457.2	protein_coding	-1	c.*4084G>A
chrA2	10409011	TTAA	T	PASS	upstream_gene_variant	MODIFIER	ADGRE2	ADGRE2	transcript	XM_045047185.1	protein_coding	-1	c.-5240_-5238delTAA
chrA2	10411963	G	A	PASS	5_prime_UTR_variant	MODIFIER	ADGRE2	ADGRE2	transcript	XM_045047185.1	protein_coding	1	c.-2289G>A
chrA2	10413776	C	T	PASS	5_prime_UTR_premature_start_codon_gain_variant	LOW	ADGRE2	ADGRE2	transcript	XM_045047185.1	protein_coding	1	c.-476C>T
chrA2	10414771	TATATATATATATATAGAG	T	PASS	intron_variant	MODIFIER	ADGRE2	ADGRE2	transcript	XM_045047173.1	protein_coding	1	c.31+370_31+387delATATATATATATATAGAG
chrA2	10414811	G	A	PASS	intron_variant	MODIFIER	ADGRE2	ADGRE2	transcript	XM_045047173.1	protein_coding	1	c.31+409G>A
chrA2	10414881	G	A	PASS	intron_variant	MODIFIER	ADGRE2	ADGRE2	transcript	XM_045047173.1	protein_coding	1	c.31+479G>A
chrA2	10426530	T	C	PASS	intron_variant	MODIFIER	ADGRE2	ADGRE2	transcript	XM_045047173.1	protein_coding	10	c.1090+281T>C
chrA2	10427985	T	C	PASS	intron_variant	MODIFIER	ADGRE2	ADGRE2	transcript	XM_045047173.1	protein_coding	10	c.1091-1102T>C
chrA2	10429875	A	G	PASS	missense_variant	MODERATE	ADGRE2	ADGRE2	transcript	XM_045047173.1	protein_coding	13	c.1525A>G	p.Arg509Gly
chrA2	10431308	T	C	PASS	intron_variant	MODIFIER	ADGRE2	ADGRE2	transcript	XM_045047173.1	protein_coding	15	c.2033+25T>C
chrA2	10433396	A	G	PASS	downstream_gene_variant	MODIFIER	ADGRE2	ADGRE2	transcript	XM_045047190.1	protein_coding	-1	c.*1241A>G
chrA2	10437164	G	A	PASS	downstream_gene_variant	MODIFIER	ADGRE2	ADGRE2	transcript	XM_045047190.1	protein_coding	-1	c.*5009G>A
chrA2	10437493	G	A	PASS	intron_variant	MODIFIER	ADGRE2	ADGRE2	transcript	XM_045047173.1	protein_coding	15	c.2034-2275G>A
chrA2	10440742	T	G	PASS	intron_variant	MODIFIER	ADGRE2	ADGRE2	transcript	XM_045047173.1	protein_coding	17	c.2193-492T>G
chrA2	10440858	G	A	PASS	intron_variant	MODIFIER	ADGRE2	ADGRE2	transcript	XM_045047173.1	protein_coding	17	c.2193-376G>A
chrA2	10440859	A	G	PASS	intron_variant	MODIFIER	ADGRE2	ADGRE2	transcript	XM_045047173.1	protein_coding	17	c.2193-375A>G
chrA2	10441291	G	A	PASS	synonymous_variant	LOW	ADGRE2	ADGRE2	transcript	XM_045047173.1	protein_coding	18	c.2250G>A	p.Leu750Leu
chrA2	10442918	C	T	PASS	intron_variant	MODIFIER	ADGRE2	ADGRE2	transcript	XM_045047173.1	protein_coding	19	c.2473-516C>T
chrA2	10443519	T	C	PASS	missense_variant	MODERATE	ADGRE2	ADGRE2	transcript	XM_045047173.1	protein_coding	20	c.2558T>C	p.Leu853Ser
chrA2	10443639	T	C	PASS	3_prime_UTR_variant	MODIFIER	ADGRE2	ADGRE2	transcript	XM_045047173.1	protein_coding	20	c.*38T>C
chrA2	10445655	C	G	PASS	downstream_gene_variant	MODIFIER	ADGRE2	ADGRE2	transcript	XM_045047173.1	protein_coding	-1	c.*2054C>G
chrA2	10446468	A	AT	PASS	downstream_gene_variant	MODIFIER	ADGRE2	ADGRE2	transcript	XM_045047173.1	protein_coding	-1	c.*2867_*2868insT
chrA2	10448376	G	T	PASS	downstream_gene_variant	MODIFIER	ADGRE2	ADGRE2	transcript	XM_045047173.1	protein_coding	-1	c.*4775G>T
chrA2	10448434	C	T	PASS	downstream_gene_variant	MODIFIER	ADGRE2	ADGRE2	transcript	XM_045047173.1	protein_coding	-1	c.*4833C>T
chrA2	10449771	C	G	PASS	downstream_gene_variant	MODIFIER	ADGRE2	ADGRE2	transcript	XM_023241032.2	protein_coding	-1	c.*3008C>G
chrA2	10450281	CTATTGTTAAGGT	C	PASS	downstream_gene_variant	MODIFIER	ADGRE2	ADGRE2	transcript	XM_023241032.2	protein_coding	-1	c.*3519_*3530delTATTGTTAAGGT
chrA2	10450316	T	C	PASS	downstream_gene_variant	MODIFIER	ADGRE2	ADGRE2	transcript	XM_023241032.2	protein_coding	-1	c.*3553T>C
chrA2	10452467	C	T	PASS	downstream_gene_variant	MODIFIER	ADGRE2	ADGRE2	transcript	XM_023241032.2	protein_coding	-1	c.*5704C>T
chrA2	10452555	C	T	PASS	intergenic_region	MODIFIER	ADGRE2-LOC123382444	ADGRE2-LOC123382444	intergenic_region	ADGRE2-LOC123382444		-1	n.10452555C>T
chrA2	10453964	G	A	PASS	intergenic_region	MODIFIER	ADGRE2-LOC123382444	ADGRE2-LOC123382444	intergenic_region	ADGRE2-LOC123382444		-1	n.10453964G>A
chrA2	10454076	C	T	PASS	intergenic_region	MODIFIER	ADGRE2-LOC123382444	ADGRE2-LOC123382444	intergenic_region	ADGRE2-LOC123382444		-1	n.10454076C>T
chrA2	10455089	T	C	PASS	intergenic_region	MODIFIER	ADGRE2-LOC123382444	ADGRE2-LOC123382444	intergenic_region	ADGRE2-LOC123382444		-1	n.10455089T>C
chrA2	10455100	A	G	PASS	intergenic_region	MODIFIER	ADGRE2-LOC123382444	ADGRE2-LOC123382444	intergenic_region	ADGRE2-LOC123382444		-1	n.10455100A>G
chrA2	10455539	G	C	PASS	intergenic_region	MODIFIER	ADGRE2-LOC123382444	ADGRE2-LOC123382444	intergenic_region	ADGRE2-LOC123382444		-1	n.10455539G>C
chrA2	10455563	A	T	PASS	intergenic_region	MODIFIER	ADGRE2-LOC123382444	ADGRE2-LOC123382444	intergenic_region	ADGRE2-LOC123382444		-1	n.10455563A>T
chrA2	10455826	G	T	PASS	intergenic_region	MODIFIER	ADGRE2-LOC123382444	ADGRE2-LOC123382444	intergenic_region	ADGRE2-LOC123382444		-1	n.10455826G>T
chrA2	10455829	T	C	PASS	intergenic_region	MODIFIER	ADGRE2-LOC123382444	ADGRE2-LOC123382444	intergenic_region	ADGRE2-LOC123382444		-1	n.10455829T>C
chrA2	10456869	TTTC	T	PASS	intergenic_region	MODIFIER	ADGRE2-LOC123382444	ADGRE2-LOC123382444	intergenic_region	ADGRE2-LOC123382444		-1	n.10456870_10456872delTTC
chrA2	10458339	T	G	PASS	intergenic_region	MODIFIER	ADGRE2-LOC123382444	ADGRE2-LOC123382444	intergenic_region	ADGRE2-LOC123382444		-1	n.10458339T>G
chrA2	10459271	T	C	PASS	upstream_gene_variant	MODIFIER	LOC123382444	LOC123382444	transcript	XM_045047234.1	protein_coding	-1	c.-4464T>C
chrA2	10459278	A	G	PASS	upstream_gene_variant	MODIFIER	LOC123382444	LOC123382444	transcript	XM_045047234.1	protein_coding	-1	c.-4457A>G
chrA2	10460958	T	A	PASS	upstream_gene_variant	MODIFIER	LOC123382444	LOC123382444	transcript	XM_045047234.1	protein_coding	-1	c.-2777T>A
chrA2	10461420	G	T	PASS	upstream_gene_variant	MODIFIER	LOC123382444	LOC123382444	transcript	XM_045047234.1	protein_coding	-1	c.-2315G>T
chrA2	10461570	TC	T	PASS	upstream_gene_variant	MODIFIER	LOC123382444	LOC123382444	transcript	XM_045047234.1	protein_coding	-1	c.-2164delC
chrA2	10461726	A	C	PASS	upstream_gene_variant	MODIFIER	LOC123382444	LOC123382444	transcript	XM_045047234.1	protein_coding	-1	c.-2009A>C
chrA2	10464681	G	A	PASS	downstream_gene_variant	MODIFIER	LOC101083497	LOC101083497	transcript	XM_023246468.2	protein_coding	-1	c.*2749C>T
chrA2	10465374	C	A	PASS	downstream_gene_variant	MODIFIER	LOC101083497	LOC101083497	transcript	XM_023246468.2	protein_coding	-1	c.*2056G>T
chrA2	10466253	C	T	PASS	3_prime_UTR_variant	MODIFIER	LOC101083497	LOC101083497	transcript	XM_023246468.2	protein_coding	20	c.*1177G>A
chrA2	10466648	G	A	PASS	3_prime_UTR_variant	MODIFIER	LOC101083497	LOC101083497	transcript	XM_023246468.2	protein_coding	20	c.*782C>T
chrA2	10467349	G	A	PASS	3_prime_UTR_variant	MODIFIER	LOC101083497	LOC101083497	transcript	XM_023246468.2	protein_coding	20	c.*81C>T
chrA2	10467414	T	C	PASS	3_prime_UTR_variant	MODIFIER	LOC101083497	LOC101083497	transcript	XM_023246468.2	protein_coding	20	c.*16A>G
chrA2	10468149	T	C	PASS	intron_variant	MODIFIER	LOC123382444	LOC123382444	transcript	XM_045047234.1	protein_coding	1	c.687+3728T>C
chrA2	10468422	T	C	PASS	missense_variant	MODERATE	LOC101083497	LOC101083497	transcript	XM_023246468.2	protein_coding	18	c.2287A>G	p.Met763Val
chrA2	10468803	A	G	PASS	intron_variant	MODIFIER	LOC123382444	LOC123382444	transcript	XM_045047234.1	protein_coding	1	c.687+4382A>G
chrA2	10474460	A	T	PASS	intron_variant	MODIFIER	LOC123382444	LOC123382444	transcript	XM_045047234.1	protein_coding	1	c.687+10039A>T
chrA2	10475807	G	T	PASS	intron_variant	MODIFIER	LOC123382444	LOC123382444	transcript	XM_045047234.1	protein_coding	1	c.687+11386G>T
chrA2	10476014	C	T	PASS	intron_variant	MODIFIER	LOC123382444	LOC123382444	transcript	XM_045047234.1	protein_coding	1	c.687+11593C>T
chrA2	10476843	C	A	PASS	intron_variant	MODIFIER	LOC123382444	LOC123382444	transcript	XM_045047234.1	protein_coding	1	c.687+12422C>A
chrA2	10476988	G	C	PASS	intron_variant	MODIFIER	LOC123382444	LOC123382444	transcript	XM_045047234.1	protein_coding	1	c.687+12567G>C
chrA2	10478271	G	A	PASS	intron_variant	MODIFIER	LOC123382444	LOC123382444	transcript	XM_045047234.1	protein_coding	1	c.687+13850G>A
chrA2	10478477	C	T	PASS	intron_variant	MODIFIER	LOC123382444	LOC123382444	transcript	XM_045047234.1	protein_coding	1	c.687+14056C>T
chrA2	10479589	A	C	PASS	intron_variant	MODIFIER	LOC123382444	LOC123382444	transcript	XM_045047234.1	protein_coding	1	c.687+15168A>C
chrA2	10479883	C	G	PASS	intron_variant	MODIFIER	LOC123382444	LOC123382444	transcript	XM_045047234.1	protein_coding	1	c.687+15462C>G
chrA2	10480339	G	A	PASS	intron_variant	MODIFIER	LOC123382444	LOC123382444	transcript	XM_045047234.1	protein_coding	1	c.687+15918G>A
chrA2	10480409	A	G	PASS	intron_variant	MODIFIER	LOC123382444	LOC123382444	transcript	XM_045047234.1	protein_coding	1	c.687+15988A>G
chrA2	10484514	G	GACGT	PASS	downstream_gene_variant	MODIFIER	LOC105261261	LOC105261261	transcript	XM_011290032.4	protein_coding	-1	c.*3420_*3421insACGT
chrA2	10486048	G	A	PASS	downstream_gene_variant	MODIFIER	LOC105261261	LOC105261261	transcript	XM_011290032.4	protein_coding	-1	c.*1887C>T
chrA2	10486660	C	G	PASS	downstream_gene_variant	MODIFIER	LOC105261261	LOC105261261	transcript	XM_011290032.4	protein_coding	-1	c.*1275G>C
chrA2	10487794	A	G	PASS	downstream_gene_variant	MODIFIER	LOC105261261	LOC105261261	transcript	XM_011290032.4	protein_coding	-1	c.*141T>C
chrA2	10489944	T	G	PASS	upstream_gene_variant	MODIFIER	LOC105261261	LOC105261261	transcript	XM_011290032.4	protein_coding	-1	c.-1809A>C
chrA2	10490190	C	A	PASS	upstream_gene_variant	MODIFIER	LOC105261261	LOC105261261	transcript	XM_011290032.4	protein_coding	-1	c.-2055G>T
chrA2	10491142	G	A	PASS	upstream_gene_variant	MODIFIER	LOC105261261	LOC105261261	transcript	XM_011290032.4	protein_coding	-1	c.-3007C>T
chrA2	10491599	G	A	PASS	upstream_gene_variant	MODIFIER	LOC105261261	LOC105261261	transcript	XM_011290032.4	protein_coding	-1	c.-3464C>T
chrA2	10491781	GGTGTTA	G	PASS	upstream_gene_variant	MODIFIER	LOC105261261	LOC105261261	transcript	XM_011290032.4	protein_coding	-1	c.-3652_-3647delTAACAC
chrA2	10492233	G	A	PASS	upstream_gene_variant	MODIFIER	LOC105261261	LOC105261261	transcript	XM_011290032.4	protein_coding	-1	c.-4098C>T
chrA2	10492259	GT	G	PASS	upstream_gene_variant	MODIFIER	LOC105261261	LOC105261261	transcript	XM_011290032.4	protein_coding	-1	c.-4125delA
chrA2	10492266	G	C	PASS	upstream_gene_variant	MODIFIER	LOC105261261	LOC105261261	transcript	XM_011290032.4	protein_coding	-1	c.-4131C>G
chrA2	10492272	A	ATGACAGGTGAGGAG	PASS	upstream_gene_variant	MODIFIER	LOC105261261	LOC105261261	transcript	XM_011290032.4	protein_coding	-1	c.-4138_-4137insCTCCTCACCTGTCA
chrA2	10492598	AT	A	PASS	upstream_gene_variant	MODIFIER	LOC105261261	LOC105261261	transcript	XM_011290032.4	protein_coding	-1	c.-4464delA
chrA2	10492856	C	T	PASS	upstream_gene_variant	MODIFIER	LOC105261261	LOC105261261	transcript	XM_011290032.4	protein_coding	-1	c.-4721G>A
chrA2	10494060	A	C	PASS	intron_variant	MODIFIER	LOC123382444	LOC123382444	transcript	XM_045047234.1	protein_coding	1	c.688-6218A>C
chrA2	10495261	TG	T	PASS	upstream_gene_variant	MODIFIER	LOC101083497	LOC101083497	transcript	XM_023246468.2	protein_coding	-1	c.-1077delC
chrA2	10495264	A	ATAC	PASS	upstream_gene_variant	MODIFIER	LOC101083497	LOC101083497	transcript	XM_023246468.2	protein_coding	-1	c.-1080_-1079insGTA
chrA2	10495268	ACTCT	A	PASS	upstream_gene_variant	MODIFIER	LOC101083497	LOC101083497	transcript	XM_023246468.2	protein_coding	-1	c.-1087_-1084delAGAG
chrA2	10495274	A	AGATGTTT	PASS	upstream_gene_variant	MODIFIER	LOC101083497	LOC101083497	transcript	XM_023246468.2	protein_coding	-1	c.-1090_-1089insAAACATC
chrA2	10496571	C	G	PASS	upstream_gene_variant	MODIFIER	LOC101083497	LOC101083497	transcript	XM_023246468.2	protein_coding	-1	c.-2386G>C
chrA2	10496759	A	G	PASS	upstream_gene_variant	MODIFIER	LOC101083497	LOC101083497	transcript	XM_023246468.2	protein_coding	-1	c.-2574T>C
chrA2	10496992	A	AT	PASS	upstream_gene_variant	MODIFIER	LOC101083497	LOC101083497	transcript	XM_023246468.2	protein_coding	-1	c.-2808_-2807insA
chrA2	10504708	C	T	PASS	downstream_gene_variant	MODIFIER	LOC123382444	LOC123382444	transcript	XM_045047234.1	protein_coding	-1	c.*4395C>T
chrA2	10530746	C	CTCTG	PASS	upstream_gene_variant	MODIFIER	LOC101100284	LOC101100284	transcript	XM_045047218.1	protein_coding	-1	c.-3253_-3252insCAGA
chrA2	10530748	A	C	PASS	upstream_gene_variant	MODIFIER	LOC101100284	LOC101100284	transcript	XM_045047218.1	protein_coding	-1	c.-3254T>G
chrA2	10530752	T	A	PASS	upstream_gene_variant	MODIFIER	LOC101100284	LOC101100284	transcript	XM_045047218.1	protein_coding	-1	c.-3258A>T
chrA2	10530783	A	AAAGG	PASS	upstream_gene_variant	MODIFIER	LOC101100284	LOC101100284	transcript	XM_045047218.1	protein_coding	-1	c.-3290_-3289insCCTT
chrA2	10568904	T	C	PASS	intragenic_variant	MODIFIER	LOC123381171	LOC123381171	gene_variant	LOC123381171		-1	n.10568904T>C
chrA2	10638718	T	G	PASS	intergenic_region	MODIFIER	LOC123382445-LOC101101292	LOC123382445-LOC101101292	intergenic_region	LOC123382445-LOC101101292		-1	n.10638718T>G
chrA2	10774472	C	G	PASS	intergenic_region	MODIFIER	LOC101081871-LOC101085613	LOC101081871-LOC101085613	intergenic_region	LOC101081871-LOC101085613		-1	n.10774472C>G
chrA2	10807966	G	A	PASS	downstream_gene_variant	MODIFIER	LOC123382453	LOC123382453	transcript	XM_045047287.1	protein_coding	-1	c.*1171C>T
chrA2	11053711	G	A	PASS	downstream_gene_variant	MODIFIER	LOC101085956	LOC101085956	transcript	XM_006928537.3	protein_coding	-1	c.*2912G>A
chrA2	11053712	T	G	PASS	downstream_gene_variant	MODIFIER	LOC101085956	LOC101085956	transcript	XM_006928537.3	protein_coding	-1	c.*2913T>G
chrA2	11359234	GC	G	PASS	upstream_gene_variant	MODIFIER	LOC123382499	LOC123382499	transcript	XR_006590940.1	pseudogene	-1	n.-2294delG
chrA2	11616809	G	A	PASS	upstream_gene_variant	MODIFIER	LOC123382512	LOC123382512	transcript	XM_045047564.1	protein_coding	-1	c.-1628G>A
chrA2	11646815	G	A	PASS	intron_variant	MODIFIER	LOC123382511	LOC123382511	transcript	XM_045047544.1	protein_coding	2	c.250-1714G>A
chrA2	12119031	A	T	PASS	intergenic_region	MODIFIER	LOC123382539-KLF2	LOC123382539-KLF2	intergenic_region	LOC123382539-KLF2		-1	n.12119031A>T
chrA2	12129988	C	T	PASS	intergenic_region	MODIFIER	LOC123382539-KLF2	LOC123382539-KLF2	intergenic_region	LOC123382539-KLF2		-1	n.12129988C>T
chrA2	12131950	G	A	PASS	intergenic_region	MODIFIER	LOC123382539-KLF2	LOC123382539-KLF2	intergenic_region	LOC123382539-KLF2		-1	n.12131950G>A
chrA2	12135784	TGAG	T	PASS	intergenic_region	MODIFIER	LOC123382539-KLF2	LOC123382539-KLF2	intergenic_region	LOC123382539-KLF2		-1	n.12135785_12135787delGAG
chrA2	12266207	G	A	PASS	5_prime_UTR_premature_start_codon_gain_variant	LOW	EPS15L1	EPS15L1	transcript	XM_045047707.1	protein_coding	1	c.-356C>T
chrA2	12266484	G	A	PASS	upstream_gene_variant	MODIFIER	LOC102900540	LOC102900540	transcript	XR_439680.3	pseudogene	-1	n.-348G>A
chrA2	12267203	G	A	PASS	upstream_gene_variant	MODIFIER	EPS15L1	EPS15L1	transcript	XM_045047708.1	protein_coding	-1	c.-1456C>T
chrA2	12273131	A	T	PASS	downstream_gene_variant	MODIFIER	LOC102900540	LOC102900540	transcript	XR_439680.3	pseudogene	-1	n.*4123A>T
chrA2	12293870	C	T	PASS	upstream_gene_variant	MODIFIER	EPS15L1	EPS15L1	transcript	XM_023246774.2	protein_coding	-1	c.-2878G>A
chrA2	12363736	G	T	PASS	upstream_gene_variant	MODIFIER	CHERP	CHERP	transcript	XM_011290401.4	protein_coding	-1	c.-5018C>A
chrA2	12387731	G	A	PASS	3_prime_UTR_variant	MODIFIER	MED26	MED26	transcript	XM_023246873.2	protein_coding	3	c.*290C>T
chrA2	12387957	TG	T	PASS	3_prime_UTR_variant	MODIFIER	MED26	MED26	transcript	XM_023246873.2	protein_coding	3	c.*63delC
chrA2	12391846	G	A	PASS	upstream_gene_variant	MODIFIER	MED26	MED26	transcript	XM_045047780.1	protein_coding	-1	c.-1066C>T
chrA2	12400757	C	T	PASS	intron_variant	MODIFIER	MED26	MED26	transcript	XM_023246873.2	protein_coding	1	c.73-10374G>A
chrA2	12403094	AGAGAGAGAGAGAGAGAGAGG	A	PASS	intron_variant	MODIFIER	MED26	MED26	transcript	XM_023246873.2	protein_coding	1	c.73-12731_73-12712delCCTCTCTCTCTCTCTCTCTC
chrA2	12426786	T	C	PASS	intron_variant	MODIFIER	MED26	MED26	transcript	XM_023246873.2	protein_coding	1	c.72+12645A>G
chrA2	12465701	G	A	PASS	upstream_gene_variant	MODIFIER	TMEM38A	TMEM38A	transcript	XM_003982055.5	protein_coding	-1	c.-4826G>A
chrA2	12530202	A	ATCCATCCATGCG	PASS	downstream_gene_variant	MODIFIER	TRNAN-AUU	TRNAN-AUU	transcript	unassigned_transcript_44	protein_coding	-1	c.*2406_*2407insCGCATGGATGGA
chrA2	12591208	C	T	PASS	intron_variant	MODIFIER	SIN3B	SIN3B	transcript	XM_023246897.2	protein_coding	3	c.375+2734C>T
chrA2	12592694	G	GCA	PASS	intron_variant	MODIFIER	SIN3B	SIN3B	transcript	XM_023246897.2	protein_coding	3	c.376-3161_376-3160insCA
chrA2	12592725	CTCTCTCTCTG	C	PASS	intron_variant	MODIFIER	SIN3B	SIN3B	transcript	XM_023246897.2	protein_coding	3	c.376-3129_376-3120delTCTCTCTCTG
chrA2	12593392	C	T	PASS	intron_variant	MODIFIER	SIN3B	SIN3B	transcript	XM_023246897.2	protein_coding	3	c.376-2463C>T
chrA2	12594326	C	G	PASS	intron_variant	MODIFIER	SIN3B	SIN3B	transcript	XM_023246897.2	protein_coding	3	c.376-1529C>G
chrA2	12602093	C	T	PASS	intron_variant	MODIFIER	SIN3B	SIN3B	transcript	XM_023246897.2	protein_coding	5	c.721-2148C>T
chrA2	12602566	G	A	PASS	intron_variant	MODIFIER	SIN3B	SIN3B	transcript	XM_023246897.2	protein_coding	5	c.721-1675G>A
chrA2	12602679	A	G	PASS	intron_variant	MODIFIER	SIN3B	SIN3B	transcript	XM_023246897.2	protein_coding	5	c.721-1562A>G
chrA2	12608496	G	A	PASS	intron_variant	MODIFIER	SIN3B	SIN3B	transcript	XM_023246897.2	protein_coding	8	c.1052+2114G>A
chrA2	12609031	G	A	PASS	intron_variant	MODIFIER	SIN3B	SIN3B	transcript	XM_023246897.2	protein_coding	8	c.1053-1617G>A
chrA2	12618916	C	T	PASS	3_prime_UTR_variant	MODIFIER	SIN3B	SIN3B	transcript	XM_045047870.1	protein_coding	15	c.*1095C>T
chrA2	12619540	T	G	PASS	3_prime_UTR_variant	MODIFIER	SIN3B	SIN3B	transcript	XM_045047870.1	protein_coding	15	c.*1719T>G
chrA2	12619800	A	G	PASS	3_prime_UTR_variant	MODIFIER	SIN3B	SIN3B	transcript	XM_045047870.1	protein_coding	15	c.*1979A>G
chrA2	12619931	T	TC	PASS	3_prime_UTR_variant	MODIFIER	SIN3B	SIN3B	transcript	XM_045047870.1	protein_coding	15	c.*2111dupC
chrA2	12621056	G	GGGGGGGGGGGT	PASS	downstream_gene_variant	MODIFIER	SIN3B	SIN3B	transcript	XM_045047870.1	protein_coding	-1	c.*3235_*3236insGGGGGGGGGGT
chrA2	12624608	CGGAG	C	PASS	upstream_gene_variant	MODIFIER	F2RL3	F2RL3	transcript	XM_023246905.2	protein_coding	-1	c.-3808_-3805delGGAG
chrA2	12624613	CT	C	PASS	upstream_gene_variant	MODIFIER	F2RL3	F2RL3	transcript	XM_023246905.2	protein_coding	-1	c.-3803delT
chrA2	12626300	G	A	PASS	upstream_gene_variant	MODIFIER	F2RL3	F2RL3	transcript	XM_023246905.2	protein_coding	-1	c.-2117G>A
chrA2	12627828	C	T	PASS	upstream_gene_variant	MODIFIER	F2RL3	F2RL3	transcript	XM_023246905.2	protein_coding	-1	c.-589C>T
chrA2	12628176	G	GCCGGC	PASS	upstream_gene_variant	MODIFIER	F2RL3	F2RL3	transcript	XM_023246905.2	protein_coding	-1	c.-241_-240insCCGGC
chrA2	12629400	G	A	PASS	missense_variant	MODERATE	F2RL3	F2RL3	transcript	XM_023246905.2	protein_coding	2	c.706G>A	p.Val236Met
chrA2	12629514	T	C	PASS	missense_variant	MODERATE	F2RL3	F2RL3	transcript	XM_023246905.2	protein_coding	2	c.820T>C	p.Tyr274His
chrA2	12630118	G	A	PASS	downstream_gene_variant	MODIFIER	CPAMD8	CPAMD8	transcript	XM_023246922.2	protein_coding	-1	c.*2410C>T
chrA2	12631086	A	C	PASS	downstream_gene_variant	MODIFIER	F2RL3	F2RL3	transcript	XM_023246905.2	protein_coding	-1	c.*719A>C
chrA2	12632019	G	C	PASS	3_prime_UTR_variant	MODIFIER	CPAMD8	CPAMD8	transcript	XM_023246922.2	protein_coding	42	c.*509C>G
chrA2	12701538	C	T	PASS	intron_variant	MODIFIER	CPAMD8	CPAMD8	transcript	XM_023246922.2	protein_coding	9	c.756-139G>A
chrA2	12720001	G	GTGTGTGTGTGTGTGTA	PASS	upstream_gene_variant	MODIFIER	CPAMD8	CPAMD8	transcript	XM_023246922.2	protein_coding	-1	c.-4865_-4864insTACACACACACACACA
chrA2	12885996	C	T	PASS	synonymous_variant	LOW	USHBP1	USHBP1	transcript	XM_003982033.6	protein_coding	10	c.1761G>A	p.Pro587Pro
chrA2	12941166	G	T	PASS	upstream_gene_variant	MODIFIER	GTPBP3	GTPBP3	transcript	XM_006928582.5	protein_coding	-1	c.-3980G>T
chrA2	12945278	A	G	PASS	upstream_gene_variant	MODIFIER	ANO8	ANO8	transcript	XM_023247026.2	protein_coding	-1	c.-2119T>C
chrA2	12947359	T	C	PASS	upstream_gene_variant	MODIFIER	ANO8	ANO8	transcript	XM_023247026.2	protein_coding	-1	c.-4200A>G
chrA2	12949155	G	A	PASS	downstream_gene_variant	MODIFIER	GTPBP3	GTPBP3	transcript	XM_006928582.5	protein_coding	-1	c.*1043G>A
chrA2	12961521	AGGGGGCGGGGGGG	A	PASS	intron_variant	MODIFIER	PLVAP	PLVAP	transcript	XM_006928583.5	protein_coding	2	c.464-53_464-41delCCCCCCCGCCCCC
chrA2	12982079	A	G	PASS	upstream_gene_variant	MODIFIER	CCDC194	CCDC194	transcript	XM_019819303.3	protein_coding	-1	c.-3470T>C
chrA2	13314377	TTTTTTTC	T	PASS	intron_variant	MODIFIER	JAK3	JAK3	transcript	XM_023247201.2	protein_coding	1	c.-13-278_-13-272delGAAAAAA
chrA2	13424583	C	T	PASS	synonymous_variant	LOW	ARRDC2	ARRDC2	transcript	XM_006928631.4	protein_coding	6	c.906C>T	p.Ile302Ile
chrA2	13425031	C	T	PASS	missense_variant	MODERATE	ARRDC2	ARRDC2	transcript	XM_006928631.4	protein_coding	7	c.1082C>T	p.Pro361Leu
chrA2	13426044	G	A	PASS	3_prime_UTR_variant	MODIFIER	ARRDC2	ARRDC2	transcript	XM_006928631.4	protein_coding	8	c.*628G>A
chrA2	13429060	T	G	PASS	downstream_gene_variant	MODIFIER	ARRDC2	ARRDC2	transcript	XM_006928631.4	protein_coding	-1	c.*3644T>G
chrA2	13431207	G	A	PASS	upstream_gene_variant	MODIFIER	LOC123382673	LOC123382673	transcript	XR_006591363.1	pseudogene	-1	n.-1899C>T
chrA2	13446749	T	C	PASS	upstream_gene_variant	MODIFIER	LOC109494819	LOC109494819	transcript	XR_002149898.2	pseudogene	-1	n.-4509A>G
chrA2	13446972	GCCCCT	G	PASS	upstream_gene_variant	MODIFIER	LOC109494819	LOC109494819	transcript	XR_002149898.2	pseudogene	-1	n.-4737_-4733delAGGGG
chrA2	13926104	GA	G	PASS	intron_variant	MODIFIER	KLHL26	KLHL26	transcript	XM_023247604.2	protein_coding	1	c.78-422delA
chrA2	14024457	T	TC	PASS	intron_variant	MODIFIER	COMP	COMP	transcript	XM_003982085.5	protein_coding	2	c.165+36_165+37insG
chrA2	14218691	CT	C	PASS	upstream_gene_variant	MODIFIER	SUGP2	SUGP2	transcript	XM_003982092.6	protein_coding	-1	c.-1980delA
chrA2	14727087	G	A	PASS	intragenic_variant	MODIFIER	LOC101092007	LOC101092007	gene_variant	LOC101092007		-1	n.14727087G>A
chrA2	14747307	T	C	PASS	missense_variant	MODERATE	ZNF502	ZNF502	transcript	XM_003982131.6	protein_coding	3	c.427T>C	p.Cys143Arg
chrA2	14763820	C	T	PASS	downstream_gene_variant	MODIFIER	ZNF501	ZNF501	transcript	XM_045048961.1	protein_coding	-1	c.*4197C>T
chrA2	14802237	C	T	PASS	intron_variant	MODIFIER	KIF15	KIF15	transcript	XM_045048991.1	protein_coding	9	c.976-36C>T
chrA2	14807960	G	A	PASS	upstream_gene_variant	MODIFIER	LOC123382859	LOC123382859	transcript	XR_006591946.1	pseudogene	-1	n.-3175C>T
chrA2	14824388	A	ACGGAC	PASS	intron_variant	MODIFIER	KIF15	KIF15	transcript	XM_045048991.1	protein_coding	17	c.2169+522_2169+523insCGGAC
chrA2	15233277	TG	T	PASS	intergenic_region	MODIFIER	LOC109495126-LARS2	LOC109495126-LARS2	intergenic_region	LOC109495126-LARS2		-1	n.15233278delG
chrA2	15410797	TCCCTTC	T	PASS	intron_variant	MODIFIER	LARS2	LARS2	transcript	XM_045049134.1	protein_coding	15	c.1862-197_1862-192delCCCTTC
chrA2	15682711	A	T	PASS	intergenic_region	MODIFIER	LZTFL1-CCR9	LZTFL1-CCR9	intergenic_region	LZTFL1-CCR9		-1	n.15682711A>T
chrA2	15808573	G	A	PASS	downstream_gene_variant	MODIFIER	XCR1	XCR1	transcript	XM_045049238.1	protein_coding	-1	c.*8107C>T
chrA2	22244354	ACCC	A	PASS	intron_variant	MODIFIER	CACNA1D	CACNA1D	transcript	XM_045051390.1	protein_coding	33	c.4201-3312_4201-3310delCCC
chrA2	22328030	G	GGGGGGGGGGGA	PASS	upstream_gene_variant	MODIFIER	IL17RB	IL17RB	transcript	XM_006928869.4	protein_coding	-1	c.-629_-628insGGGGGGGGGGA
chrA2	24767809	C	CTT	PASS	upstream_gene_variant	MODIFIER	CCDC66	CCDC66	transcript	XM_006928872.3	protein_coding	-1	c.-3321_-3320insTT
chrA2	25583800	G	A	PASS	intron_variant	MODIFIER	DNAH12	DNAH12	transcript	XM_045051713.1	protein_coding	23	c.2931+912C>T
chrA2	26871173	C	G	PASS	intron_variant	MODIFIER	LOC102901572	LOC102901572	transcript	XR_002740290.2	pseudogene	1	n.249-5440C>G
chrA2	28934989	A	AAAAC	PASS	intergenic_region	MODIFIER	FHIT-LOC101083153	FHIT-LOC101083153	intergenic_region	FHIT-LOC101083153		-1	n.28934989_28934990insAAAC
chrA2	28934991	A	T	PASS	intergenic_region	MODIFIER	FHIT-LOC101083153	FHIT-LOC101083153	intergenic_region	FHIT-LOC101083153		-1	n.28934991A>T
chrA2	28934997	AAC	A	PASS	intergenic_region	MODIFIER	FHIT-LOC101083153	FHIT-LOC101083153	intergenic_region	FHIT-LOC101083153		-1	n.28934998_28934999delAC
chrA2	31114097	G	GA	PASS	intron_variant	MODIFIER	SYNPR	SYNPR	transcript	XM_023249907.2	protein_coding	3	c.210-5919_210-5918insA
chrA2	31115912	G	A	PASS	intron_variant	MODIFIER	SYNPR	SYNPR	transcript	XM_023249907.2	protein_coding	3	c.210-4104G>A
chrA2	31138620	C	T	PASS	intron_variant	MODIFIER	SYNPR	SYNPR	transcript	XM_023249907.2	protein_coding	4	c.408+18406C>T
chrA2	31139359	G	A	PASS	intron_variant	MODIFIER	SYNPR	SYNPR	transcript	XM_023249907.2	protein_coding	4	c.408+19145G>A
chrA2	31221695	G	A	PASS	intergenic_region	MODIFIER	SNTN-CA2H3orf49	SNTN-CA2H3orf49	intergenic_region	SNTN-CA2H3orf49		-1	n.31221695G>A
chrA2	31224221	C	T	PASS	intergenic_region	MODIFIER	SNTN-CA2H3orf49	SNTN-CA2H3orf49	intergenic_region	SNTN-CA2H3orf49		-1	n.31224221C>T
chrA2	31227974	G	A	PASS	intergenic_region	MODIFIER	SNTN-CA2H3orf49	SNTN-CA2H3orf49	intergenic_region	SNTN-CA2H3orf49		-1	n.31227974G>A
chrA2	31705460	A	C	PASS	intron_variant	MODIFIER	PRICKLE2	PRICKLE2	transcript	XM_045051819.1	protein_coding	3	c.420+13580T>G
chrA2	31719226	G	A	PASS	splice_region_variant&intron_variant	LOW	PRICKLE2	PRICKLE2	transcript	XM_045051819.1	protein_coding	2	c.237-3C>T
chrA2	31721199	C	T	PASS	intron_variant	MODIFIER	PRICKLE2	PRICKLE2	transcript	XM_045051819.1	protein_coding	2	c.237-1976G>A
chrA2	31733020	C	G	PASS	intron_variant	MODIFIER	PRICKLE2	PRICKLE2	transcript	XM_045051819.1	protein_coding	2	c.237-13797G>C
chrA2	31735389	AAAAG	A	PASS	intron_variant	MODIFIER	PRICKLE2	PRICKLE2	transcript	XM_045051819.1	protein_coding	2	c.237-16170_237-16167delCTTT
chrA2	31768723	AGAAAGAAAGAAAGAAAGAAAGAAAGAAAGAAAGAAAGAAAGAAAGAAAGAAAGAAAGAAGGAAGGAAGGAAGGAAG	A	PASS	intron_variant	MODIFIER	PRICKLE2	PRICKLE2	transcript	XM_045051819.1	protein_coding	2	c.237-49576_237-49501delCTTCCTTCCTTCCTTCCTTCTTTCTTTCTTTCTTTCTTTCTTTCTTTCTTTCTTTCTTTCTTTCTTTCTTTCTTTC
chrA2	34805639	T	TGAGG	PASS	intron_variant	MODIFIER	SUCLG2	SUCLG2	transcript	XM_023249935.2	protein_coding	3	c.327-200_327-199insCCTC
chrA2	36856310	T	A	PASS	upstream_gene_variant	MODIFIER	LOC123384118	LOC123384118	transcript	XR_006594789.1	pseudogene	-1	n.-2079T>A
chrA2	36958520	C	T	PASS	intron_variant	MODIFIER	LOC123384112	LOC123384112	transcript	XM_045053165.1	protein_coding	1	c.-225+24696G>A
chrA2	36978107	T	A	PASS	intron_variant	MODIFIER	LOC123384112	LOC123384112	transcript	XM_045053165.1	protein_coding	1	c.-225+5109A>T
chrA2	36979862	T	A	PASS	intron_variant	MODIFIER	LOC123384112	LOC123384112	transcript	XM_045053165.1	protein_coding	1	c.-225+3354A>T
chrA2	36979951	T	C	PASS	intron_variant	MODIFIER	LOC123384112	LOC123384112	transcript	XM_045053165.1	protein_coding	1	c.-225+3265A>G
chrA2	36980362	A	T	PASS	intron_variant	MODIFIER	LOC123384112	LOC123384112	transcript	XM_045053165.1	protein_coding	1	c.-225+2854T>A
chrA2	36985812	G	C	PASS	upstream_gene_variant	MODIFIER	LOC123384112	LOC123384112	transcript	XM_045053165.1	protein_coding	-1	c.-2821C>G
chrA2	36985813	C	T	PASS	upstream_gene_variant	MODIFIER	LOC123384112	LOC123384112	transcript	XM_045053165.1	protein_coding	-1	c.-2822G>A
chrA2	36985831	T	C	PASS	upstream_gene_variant	MODIFIER	LOC123384112	LOC123384112	transcript	XM_045053165.1	protein_coding	-1	c.-2840A>G
chrA2	36985882	A	G	PASS	upstream_gene_variant	MODIFIER	LOC123384112	LOC123384112	transcript	XM_045053165.1	protein_coding	-1	c.-2891T>C
chrA2	37073275	C	T	PASS	intron_variant	MODIFIER	MITF	MITF	transcript	XM_045051853.1	protein_coding	1	c.104+11584C>T
chrA2	37134228	C	CT	PASS	intron_variant	MODIFIER	MITF	MITF	transcript	XM_045051853.1	protein_coding	1	c.105-60904_105-60903insT
chrA2	37408932	G	A	PASS	intergenic_region	MODIFIER	LOC123381209-MDFIC2	LOC123381209-MDFIC2	intergenic_region	LOC123381209-MDFIC2		-1	n.37408932G>A
chrA2	37836556	A	G	PASS	intron_variant	MODIFIER	LOC123383745	LOC123383745	transcript	XR_006593893.1	pseudogene	2	n.226-92496A>G
chrA2	40333742	G	A	PASS	intron_variant	MODIFIER	LOC123381212	LOC123381212	transcript	XR_006587948.1	pseudogene	2	n.238+577G>A
chrA2	46591873	GGGGGGC	G	PASS	downstream_gene_variant	MODIFIER	ITPR1	ITPR1	transcript	XM_023249983.2	protein_coding	-1	c.*1559_*1564delGGGGGC
chrA2	48674362	G	GTTTTTCCTTCCTTCCTTCCTTCCTTCCTTCCTTCCTTCCTTCCTTCCTTCCT	PASS	intron_variant	MODIFIER	GRM7	GRM7	transcript	XM_011280176.4	protein_coding	1	c.520-22703_520-22702insTTTTTCCTTCCTTCCTTCCTTCCTTCCTTCCTTCCTTCCTTCCTTCCTTCCT
chrA2	55903385	A	C	PASS	intron_variant	MODIFIER	LOC123383779	LOC123383779	transcript	XR_006593983.1	pseudogene	1	n.1449+10223A>C
chrA2	56271460	G	C	PASS	upstream_gene_variant	MODIFIER	LOC123384142	LOC123384142	transcript	XR_006594826.1	pseudogene	-1	n.-300C>G
chrA2	56276738	C	T	PASS	intron_variant	MODIFIER	LOC123384142	LOC123384142	transcript	XR_006594827.1	pseudogene	1	n.3132+2858G>A
chrA2	56276754	C	G	PASS	intron_variant	MODIFIER	LOC123384142	LOC123384142	transcript	XR_006594827.1	pseudogene	1	n.3132+2842G>C
chrA2	56338700	A	G	PASS	upstream_gene_variant	MODIFIER	LOC123384148	LOC123384148	transcript	XR_006594835.1	pseudogene	-1	n.-4225T>C
chrA2	56341448	C	A	PASS	intron_variant	MODIFIER	IQSEC1	IQSEC1	transcript	XM_045053194.1	protein_coding	2	c.-299+153826C>A
chrA2	56341581	T	A	PASS	intron_variant	MODIFIER	IQSEC1	IQSEC1	transcript	XM_045053194.1	protein_coding	2	c.-299+153959T>A
chrA2	56341687	C	G	PASS	intron_variant	MODIFIER	IQSEC1	IQSEC1	transcript	XM_045053194.1	protein_coding	2	c.-299+154065C>G
chrA2	56343938	T	A	PASS	intron_variant	MODIFIER	IQSEC1	IQSEC1	transcript	XM_045053194.1	protein_coding	2	c.-299+156316T>A
chrA2	56361082	A	G	PASS	upstream_gene_variant	MODIFIER	LOC123384144	LOC123384144	transcript	XR_006594830.1	pseudogene	-1	n.-226T>C
chrA2	56439819	G	C	PASS	intron_variant	MODIFIER	IQSEC1	IQSEC1	transcript	XM_045053194.1	protein_coding	2	c.-298-245812G>C
chrA2	56482220	C	G	PASS	upstream_gene_variant	MODIFIER	LOC123384143	LOC123384143	transcript	XR_006594829.1	pseudogene	-1	n.-1486G>C
chrA2	56577142	T	C	PASS	intron_variant	MODIFIER	IQSEC1	IQSEC1	transcript	XM_045053194.1	protein_coding	2	c.-298-108489T>C
chrA2	56661291	CCCA	C	PASS	intron_variant	MODIFIER	IQSEC1	IQSEC1	transcript	XM_045053195.1	protein_coding	1	c.137+19556_137+19558delCCA
chrA2	57314719	G	C	PASS	non_coding_transcript_exon_variant	MODIFIER	LOC123383787	LOC123383787	transcript	XR_006593996.1	pseudogene	2	n.24470C>G
chrA2	57321606	G	C	PASS	intron_variant	MODIFIER	LOC123383787	LOC123383787	transcript	XR_006593996.1	pseudogene	1	n.20093-2510C>G
chrA2	57328220	C	T	PASS	downstream_gene_variant	MODIFIER	LOC123383793	LOC123383793	transcript	XR_006594004.1	pseudogene	-1	n.*4422C>T
chrA2	57363268	G	T	PASS	upstream_gene_variant	MODIFIER	LOC123383788	LOC123383788	transcript	XR_006593997.1	pseudogene	-1	n.-70C>A
chrA2	57364955	C	T	PASS	upstream_gene_variant	MODIFIER	LOC123383788	LOC123383788	transcript	XR_006593997.1	pseudogene	-1	n.-1757G>A
chrA2	57365035	C	T	PASS	upstream_gene_variant	MODIFIER	LOC123383788	LOC123383788	transcript	XR_006593997.1	pseudogene	-1	n.-1837G>A
chrA2	57366183	C	A	PASS	upstream_gene_variant	MODIFIER	LOC123383788	LOC123383788	transcript	XR_006593997.1	pseudogene	-1	n.-2985G>T
chrA2	57369297	C	G	PASS	intron_variant	MODIFIER	LOC123383787	LOC123383787	transcript	XR_006593996.1	pseudogene	1	n.20092+3725G>C
chrA2	57370967	G	C	PASS	intron_variant	MODIFIER	LOC123383787	LOC123383787	transcript	XR_006593996.1	pseudogene	1	n.20092+2055C>G
chrA2	57380025	G	A	PASS	non_coding_transcript_exon_variant	MODIFIER	LOC123383787	LOC123383787	transcript	XR_006593996.1	pseudogene	1	n.13089C>T
chrA2	57380472	T	A	PASS	non_coding_transcript_exon_variant	MODIFIER	LOC123383787	LOC123383787	transcript	XR_006593996.1	pseudogene	1	n.12642A>T
chrA2	57395623	C	G	PASS	upstream_gene_variant	MODIFIER	LOC123383787	LOC123383787	transcript	XR_006593996.1	pseudogene	-1	n.-2510G>C
chrA2	57603457	G	A	PASS	upstream_gene_variant	MODIFIER	LOC123383798	LOC123383798	transcript	XR_006594009.1	pseudogene	-1	n.-4185G>A
chrA2	59427509	A	C	PASS	upstream_gene_variant	MODIFIER	TXNRD3	TXNRD3	transcript	XM_023250090.2	protein_coding	-1	c.-667A>C
chrA2	60459885	GGTCT	G	PASS	upstream_gene_variant	MODIFIER	LOC123383806	LOC123383806	transcript	XM_045052066.1	protein_coding	-1	c.-3095_-3092delAGAC
chrA2	61719026	GC	G	PASS	downstream_gene_variant	MODIFIER	PPIA	PPIA	transcript	NM_001009370.1	protein_coding	-1	c.*3188delC
chrA2	62167875	G	T	PASS	upstream_gene_variant	MODIFIER	LOC102900793	LOC102900793	transcript	XM_006929064.5	protein_coding	-1	c.-4301C>A
chrA2	64902505	C	A	PASS	intron_variant	MODIFIER	VWC2	VWC2	transcript	XM_045052109.1	protein_coding	3	c.967+35462C>A
chrA2	65421576	G	GC	PASS	intergenic_region	MODIFIER	IKZF1-FIGNL1	IKZF1-FIGNL1	intergenic_region	IKZF1-FIGNL1		-1	n.65421576_65421577insC
chrA2	66405085	G	A	PASS	intergenic_region	MODIFIER	COBL-LOC111560874	COBL-LOC111560874	intergenic_region	COBL-LOC111560874		-1	n.66405085G>A
chrA2	68125958	ACAAAAAG	A	PASS	intergenic_region	MODIFIER	POM121L12-LOC123381225	POM121L12-LOC123381225	intergenic_region	POM121L12-LOC123381225		-1	n.68125959_68125965delCAAAAAG
chrA2	70445493	C	G	PASS	intron_variant	MODIFIER	LOC123383818	LOC123383818	transcript	XM_045052159.1	protein_coding	2	c.-464+13597C>G
chrA2	70456594	T	G	PASS	upstream_gene_variant	MODIFIER	LOC123383819	LOC123383819	transcript	XM_045052168.1	protein_coding	-1	c.-930A>C
chrA2	70463165	G	T	PASS	intron_variant	MODIFIER	LOC123383818	LOC123383818	transcript	XM_045052159.1	protein_coding	6	c.500+360G>T
chrA2	70567871	G	T	PASS	intergenic_region	MODIFIER	LOC123383817-LOC123383821	LOC123383817-LOC123383821	intergenic_region	LOC123383817-LOC123383821		-1	n.70567871G>T
chrA2	70596422	C	G	PASS	intergenic_region	MODIFIER	LOC123383817-LOC123383821	LOC123383817-LOC123383821	intergenic_region	LOC123383817-LOC123383821		-1	n.70596422C>G
chrA2	70596423	C	T	PASS	intergenic_region	MODIFIER	LOC123383817-LOC123383821	LOC123383817-LOC123383821	intergenic_region	LOC123383817-LOC123383821		-1	n.70596423C>T
chrA2	70604438	G	A	PASS	downstream_gene_variant	MODIFIER	LOC123383821	LOC123383821	transcript	XR_006594068.1	pseudogene	-1	n.*3430C>T
chrA2	70604477	A	C	PASS	downstream_gene_variant	MODIFIER	LOC123383821	LOC123383821	transcript	XR_006594068.1	pseudogene	-1	n.*3391T>G
chrA2	75206938	GA	G	PASS	intergenic_region	MODIFIER	POU6F2-VPS41	POU6F2-VPS41	intergenic_region	POU6F2-VPS41		-1	n.75206939delA
chrA2	75774356	A	G	PASS	intron_variant	MODIFIER	AMPH	AMPH	transcript	XM_023250207.2	protein_coding	19	c.1929+3545A>G
chrA2	77136992	C	G	PASS	intron_variant	MODIFIER	DLD	DLD	transcript	XM_003982645.5	protein_coding	2	c.118+725G>C
chrA2	81856730	A	G	PASS	intron_variant	MODIFIER	FAM185A	FAM185A	transcript	XM_045052299.1	protein_coding	3	c.654+2237T>C
chrA2	84725657	A	C	PASS	downstream_gene_variant	MODIFIER	GNAI1	GNAI1	transcript	XM_023250305.2	protein_coding	-1	c.*6749A>C
chrA2	84733574	A	G	PASS	intergenic_region	MODIFIER	GNAI1-GNAT3	GNAI1-GNAT3	intergenic_region	GNAI1-GNAT3		-1	n.84733574A>G
chrA2	84743197	G	C	PASS	intergenic_region	MODIFIER	GNAI1-GNAT3	GNAI1-GNAT3	intergenic_region	GNAI1-GNAT3		-1	n.84743197G>C
chrA2	84744820	C	T	PASS	intergenic_region	MODIFIER	GNAI1-GNAT3	GNAI1-GNAT3	intergenic_region	GNAI1-GNAT3		-1	n.84744820C>T
chrA2	84747842	C	T	PASS	intergenic_region	MODIFIER	GNAI1-GNAT3	GNAI1-GNAT3	intergenic_region	GNAI1-GNAT3		-1	n.84747842C>T
chrA2	84751210	G	A	PASS	intergenic_region	MODIFIER	GNAI1-GNAT3	GNAI1-GNAT3	intergenic_region	GNAI1-GNAT3		-1	n.84751210G>A
chrA2	84752861	C	T	PASS	intergenic_region	MODIFIER	GNAI1-GNAT3	GNAI1-GNAT3	intergenic_region	GNAI1-GNAT3		-1	n.84752861C>T
chrA2	84761125	G	A	PASS	intergenic_region	MODIFIER	GNAI1-GNAT3	GNAI1-GNAT3	intergenic_region	GNAI1-GNAT3		-1	n.84761125G>A
chrA2	84770660	G	GT	PASS	intergenic_region	MODIFIER	GNAI1-GNAT3	GNAI1-GNAT3	intergenic_region	GNAI1-GNAT3		-1	n.84770660_84770661insT
chrA2	84791061	G	A	PASS	intergenic_region	MODIFIER	GNAI1-GNAT3	GNAI1-GNAT3	intergenic_region	GNAI1-GNAT3		-1	n.84791061G>A
chrA2	84819704	A	G	PASS	intergenic_region	MODIFIER	GNAI1-GNAT3	GNAI1-GNAT3	intergenic_region	GNAI1-GNAT3		-1	n.84819704A>G
chrA2	84824541	AT	A	PASS	intergenic_region	MODIFIER	GNAI1-GNAT3	GNAI1-GNAT3	intergenic_region	GNAI1-GNAT3		-1	n.84824542delT
chrA2	84828124	G	C	PASS	intergenic_region	MODIFIER	GNAI1-GNAT3	GNAI1-GNAT3	intergenic_region	GNAI1-GNAT3		-1	n.84828124G>C
chrA2	84829667	A	T	PASS	intergenic_region	MODIFIER	GNAI1-GNAT3	GNAI1-GNAT3	intergenic_region	GNAI1-GNAT3		-1	n.84829667A>T
chrA2	84847858	C	T	PASS	intergenic_region	MODIFIER	GNAI1-GNAT3	GNAI1-GNAT3	intergenic_region	GNAI1-GNAT3		-1	n.84847858C>T
chrA2	84853850	C	T	PASS	intergenic_region	MODIFIER	GNAI1-GNAT3	GNAI1-GNAT3	intergenic_region	GNAI1-GNAT3		-1	n.84853850C>T
chrA2	84854442	C	A	PASS	intergenic_region	MODIFIER	GNAI1-GNAT3	GNAI1-GNAT3	intergenic_region	GNAI1-GNAT3		-1	n.84854442C>A
chrA2	84854489	G	A	PASS	intergenic_region	MODIFIER	GNAI1-GNAT3	GNAI1-GNAT3	intergenic_region	GNAI1-GNAT3		-1	n.84854489G>A
chrA2	84855305	CTATTTT	C	PASS	intergenic_region	MODIFIER	GNAI1-GNAT3	GNAI1-GNAT3	intergenic_region	GNAI1-GNAT3		-1	n.84855306_84855311delTATTTT
chrA2	84855467	G	A	PASS	intergenic_region	MODIFIER	GNAI1-GNAT3	GNAI1-GNAT3	intergenic_region	GNAI1-GNAT3		-1	n.84855467G>A
chrA2	84856205	T	G	PASS	intergenic_region	MODIFIER	GNAI1-GNAT3	GNAI1-GNAT3	intergenic_region	GNAI1-GNAT3		-1	n.84856205T>G
chrA2	84856819	T	TA	PASS	intergenic_region	MODIFIER	GNAI1-GNAT3	GNAI1-GNAT3	intergenic_region	GNAI1-GNAT3		-1	n.84856819_84856820insA
chrA2	84856983	T	C	PASS	intergenic_region	MODIFIER	GNAI1-GNAT3	GNAI1-GNAT3	intergenic_region	GNAI1-GNAT3		-1	n.84856983T>C
chrA2	84857010	A	G	PASS	intergenic_region	MODIFIER	GNAI1-GNAT3	GNAI1-GNAT3	intergenic_region	GNAI1-GNAT3		-1	n.84857010A>G
chrA2	84857055	C	T	PASS	intergenic_region	MODIFIER	GNAI1-GNAT3	GNAI1-GNAT3	intergenic_region	GNAI1-GNAT3		-1	n.84857055C>T
chrA2	84857266	C	T	PASS	intergenic_region	MODIFIER	GNAI1-GNAT3	GNAI1-GNAT3	intergenic_region	GNAI1-GNAT3		-1	n.84857266C>T
chrA2	84857699	G	GCT	PASS	intergenic_region	MODIFIER	GNAI1-GNAT3	GNAI1-GNAT3	intergenic_region	GNAI1-GNAT3		-1	n.84857699_84857700insCT
chrA2	84857791	T	G	PASS	intergenic_region	MODIFIER	GNAI1-GNAT3	GNAI1-GNAT3	intergenic_region	GNAI1-GNAT3		-1	n.84857791T>G
chrA2	84857894	C	A	PASS	intergenic_region	MODIFIER	GNAI1-GNAT3	GNAI1-GNAT3	intergenic_region	GNAI1-GNAT3		-1	n.84857894C>A
chrA2	84857947	A	G	PASS	intergenic_region	MODIFIER	GNAI1-GNAT3	GNAI1-GNAT3	intergenic_region	GNAI1-GNAT3		-1	n.84857947A>G
chrA2	84858051	T	C	PASS	intergenic_region	MODIFIER	GNAI1-GNAT3	GNAI1-GNAT3	intergenic_region	GNAI1-GNAT3		-1	n.84858051T>C
chrA2	84858753	G	GA	PASS	intergenic_region	MODIFIER	GNAI1-GNAT3	GNAI1-GNAT3	intergenic_region	GNAI1-GNAT3		-1	n.84858753_84858754insA
chrA2	84858874	T	C	PASS	intergenic_region	MODIFIER	GNAI1-GNAT3	GNAI1-GNAT3	intergenic_region	GNAI1-GNAT3		-1	n.84858874T>C
chrA2	84859280	C	T	PASS	intergenic_region	MODIFIER	GNAI1-GNAT3	GNAI1-GNAT3	intergenic_region	GNAI1-GNAT3		-1	n.84859280C>T
chrA2	84859652	A	G	PASS	intergenic_region	MODIFIER	GNAI1-GNAT3	GNAI1-GNAT3	intergenic_region	GNAI1-GNAT3		-1	n.84859652A>G
chrA2	84859900	A	G	PASS	intergenic_region	MODIFIER	GNAI1-GNAT3	GNAI1-GNAT3	intergenic_region	GNAI1-GNAT3		-1	n.84859900A>G
chrA2	85001340	A	G	PASS	intron_variant	MODIFIER	GNAT3	GNAT3	transcript	XM_003982705.5	protein_coding	3	c.303+3972T>C
chrA2	85343403	A	C	PASS	intron_variant	MODIFIER	SEMA3C	SEMA3C	transcript	XM_045052314.1	protein_coding	9	c.917-2555T>G
chrA2	85343710	A	G	PASS	intron_variant	MODIFIER	SEMA3C	SEMA3C	transcript	XM_045052314.1	protein_coding	9	c.917-2862T>C
chrA2	85343736	G	A	PASS	intron_variant	MODIFIER	SEMA3C	SEMA3C	transcript	XM_045052314.1	protein_coding	9	c.917-2888C>T
chrA2	85429625	A	AAAAAAAAATT	PASS	intron_variant	MODIFIER	SEMA3C	SEMA3C	transcript	XM_045052314.1	protein_coding	2	c.103+28999_103+29000insAATTTTTTTT
chrA2	86127522	A	G	PASS	intergenic_region	MODIFIER	LOC123381244-HGF	LOC123381244-HGF	intergenic_region	LOC123381244-HGF		-1	n.86127522A>G
chrA2	86526962	G	A	PASS	intron_variant	MODIFIER	CACNA2D1	CACNA2D1	transcript	XM_011280348.4	protein_coding	10	c.880-4947C>T
chrA2	86826956	AAAGAAAAG	A	PASS	intron_variant	MODIFIER	CACNA2D1	CACNA2D1	transcript	XM_011280348.4	protein_coding	2	c.177+7596_177+7603delCTTTTCTT
chrA2	94839495	C	T	PASS	intron_variant	MODIFIER	CDK14	CDK14	transcript	XM_045053221.1	protein_coding	14	c.1324+2774C>T
chrA2	96240917	G	C	PASS	intron_variant	MODIFIER	CDK6	CDK6	transcript	XM_003982756.5	protein_coding	4	c.537+13442C>G
chrA2	103554786	G	GAGGA	PASS	intergenic_region	MODIFIER	LOC123383887-LOC123383888	LOC123383887-LOC123383888	intergenic_region	LOC123383887-LOC123383888		-1	n.103554786_103554787insAGGA
chrA2	103779456	AAAGAAAGAAGAAAGAAGGAAGGAAAGAT	A	PASS	intergenic_region	MODIFIER	LOC123383887-LOC123383888	LOC123383887-LOC123383888	intergenic_region	LOC123383887-LOC123383888		-1	n.103779457_103779484delAAGAAAGAAGAAAGAAGGAAGGAAAGAT
chrA2	104800427	G	A	PASS	intron_variant	MODIFIER	THSD7A	THSD7A	transcript	XM_019825528.3	protein_coding	7	c.1879+10701C>T
chrA2	105546496	CT	C	PASS	intron_variant	MODIFIER	VWDE	VWDE	transcript	XM_023250399.2	protein_coding	3	c.485-3272delA
chrA2	109744212	T	A	PASS	intergenic_region	MODIFIER	AGR2-LOC111559612	AGR2-LOC111559612	intergenic_region	AGR2-LOC111559612		-1	n.109744212T>A
chrA2	110172888	G	A	PASS	intergenic_region	MODIFIER	AHR-LOC123383895	AHR-LOC123383895	intergenic_region	AHR-LOC123383895		-1	n.110172888G>A
chrA2	110174132	G	A	PASS	intergenic_region	MODIFIER	AHR-LOC123383895	AHR-LOC123383895	intergenic_region	AHR-LOC123383895		-1	n.110174132G>A
chrA2	110178506	TA	T	PASS	intergenic_region	MODIFIER	AHR-LOC123383895	AHR-LOC123383895	intergenic_region	AHR-LOC123383895		-1	n.110178507delA
chrA2	110190448	C	T	PASS	intergenic_region	MODIFIER	AHR-LOC123383895	AHR-LOC123383895	intergenic_region	AHR-LOC123383895		-1	n.110190448C>T
chrA2	114730205	A	ACCCCCCCCCCCCCCCCC	PASS	intron_variant	MODIFIER	RAPGEF5	RAPGEF5	transcript	XM_023250436.2	protein_coding	1	c.231+12232_231+12233insGGGGGGGGGGGGGGGGG
chrA2	115593433	GGGGGA	G	PASS	intron_variant	MODIFIER	IGF2BP3	IGF2BP3	transcript	XM_003982846.5	protein_coding	3	c.286-16032_286-16028delTCCCC
chrA2	119001177	C	T	PASS	downstream_gene_variant	MODIFIER	LOC109497502	LOC109497502	transcript	XR_002153758.2	pseudogene	-1	n.*2366G>A
chrA2	120569152	T	A	PASS	intergenic_region	MODIFIER	LOC109497506-LOC123381265	LOC109497506-LOC123381265	intergenic_region	LOC109497506-LOC123381265		-1	n.120569152T>A
chrA2	121629376	AGAAAAAGAAAAAGAAAAAGAAGGAAGGAAGGAAGGAAGGAAG	A	PASS	upstream_gene_variant	MODIFIER	LOC111559522	LOC111559522	transcript	XR_002740540.2	pseudogene	-1	n.-4135_-4094delCTTCCTTCCTTCCTTCCTTCCTTCTTTTTCTTTTTCTTTTTC
chrA2	123966633	G	A	PASS	upstream_gene_variant	MODIFIER	LOC111557411	LOC111557411	transcript	XM_045052573.1	protein_coding	-1	c.-77G>A
chrA2	126322396	C	CCCCCT	PASS	intron_variant	MODIFIER	SEPTIN7	SEPTIN7	transcript	XM_045052605.1	protein_coding	1	c.62-9560_62-9559insCCCCT
chrA2	130163318	A	T	PASS	intron_variant	MODIFIER	IMMP2L	IMMP2L	transcript	XM_003982963.6	protein_coding	4	c.239+252186T>A
chrA2	130179497	T	A	PASS	intron_variant	MODIFIER	IMMP2L	IMMP2L	transcript	XM_003982963.6	protein_coding	4	c.239+236007A>T
chrA2	130272577	A	G	PASS	upstream_gene_variant	MODIFIER	LOC111559578	LOC111559578	transcript	XR_002740707.2	snRNA	-1	n.-2416A>G
chrA2	130300025	A	G	PASS	intron_variant	MODIFIER	IMMP2L	IMMP2L	transcript	XM_003982963.6	protein_coding	4	c.239+115479T>C
chrA2	139917884	C	T	PASS	intron_variant	MODIFIER	CADPS2	CADPS2	transcript	XM_045052666.1	protein_coding	9	c.1546-5570G>A
chrA2	139923873	G	A	PASS	intron_variant	MODIFIER	CADPS2	CADPS2	transcript	XM_045052666.1	protein_coding	9	c.1546-11559C>T
chrA2	139945339	C	T	PASS	intron_variant	MODIFIER	CADPS2	CADPS2	transcript	XM_045052666.1	protein_coding	8	c.1479-2832G>A
chrA2	140015901	A	T	PASS	upstream_gene_variant	MODIFIER	LOC111559618	LOC111559618	transcript	XR_002740747.1	snRNA	-1	n.-3388A>T
chrA2	140031070	ATTATAC	A	PASS	intron_variant	MODIFIER	CADPS2	CADPS2	transcript	XM_045052666.1	protein_coding	6	c.1227-13594_1227-13589delGTATAA
chrA2	140052123	AG	A	PASS	intron_variant	MODIFIER	CADPS2	CADPS2	transcript	XM_045052666.1	protein_coding	6	c.1226+10630delC
chrA2	140059971	C	T	PASS	intron_variant	MODIFIER	CADPS2	CADPS2	transcript	XM_045052666.1	protein_coding	6	c.1226+2783G>A
chrA2	140079474	G	A	PASS	intron_variant	MODIFIER	CADPS2	CADPS2	transcript	XM_045052666.1	protein_coding	3	c.787-4386C>T
chrA2	140081167	G	C	PASS	intron_variant	MODIFIER	CADPS2	CADPS2	transcript	XM_045052666.1	protein_coding	3	c.787-6079C>G
chrA2	140087086	G	A	PASS	intron_variant	MODIFIER	CADPS2	CADPS2	transcript	XM_045052666.1	protein_coding	3	c.787-11998C>T
chrA2	140210893	AG	A	PASS	intron_variant	MODIFIER	CADPS2	CADPS2	transcript	XM_045052666.1	protein_coding	1	c.340-41846delC
chrA2	140293847	C	A	PASS	5_prime_UTR_variant	MODIFIER	CADPS2	CADPS2	transcript	XM_045052666.1	protein_coding	1	c.-190G>T
chrA2	140390657	G	C	PASS	intron_variant	MODIFIER	TAS2R16	TAS2R16	transcript	XM_045052638.1	protein_coding	2	c.198-8358C>G
chrA2	140429509	C	T	PASS	downstream_gene_variant	MODIFIER	SLC13A1	SLC13A1	transcript	XM_019825748.2	protein_coding	-1	c.*2085G>A
chrA2	140695291	G	A	PASS	intron_variant	MODIFIER	IQUB	IQUB	transcript	XM_019825746.3	protein_coding	12	c.2221-7121C>T
chrA2	140846136	C	T	PASS	intron_variant	MODIFIER	ASB15	ASB15	transcript	XM_045052692.1	protein_coding	3	c.-76+1350C>T
chrA2	140849043	G	A	PASS	intron_variant	MODIFIER	ASB15	ASB15	transcript	XM_045052692.1	protein_coding	3	c.-76+4257G>A
chrA2	140914951	C	T	PASS	downstream_gene_variant	MODIFIER	LMOD2	LMOD2	transcript	XM_011280526.4	protein_coding	-1	c.*2709C>T
chrA2	140928396	T	C	PASS	downstream_gene_variant	MODIFIER	WASL	WASL	transcript	XM_011280527.3	protein_coding	-1	c.*4220A>G
chrA2	140931038	C	A	PASS	3_prime_UTR_variant	MODIFIER	WASL	WASL	transcript	XM_011280527.3	protein_coding	11	c.*1578G>T
chrA2	140938380	G	T	PASS	intron_variant	MODIFIER	WASL	WASL	transcript	XM_011280527.3	protein_coding	9	c.1347+818C>A
chrA2	141031182	T	C	PASS	intron_variant	MODIFIER	LOC109497576	LOC109497576	transcript	XR_006594487.1	pseudogene	4	n.2972-922A>G
chrA2	141035916	C	T	PASS	upstream_gene_variant	MODIFIER	LOC123384008	LOC123384008	transcript	XR_006594490.1	pseudogene	-1	n.-817C>T
chrA2	141069814	A	G	PASS	upstream_gene_variant	MODIFIER	LOC101093011	LOC101093011	transcript	XM_023250528.2	protein_coding	-1	c.-3051A>G
chrA2	141074832	T	TTTGTTAGGAGCCAAGCTCCTAAGCCC	PASS	intron_variant	MODIFIER	LOC101093011	LOC101093011	transcript	XM_023250528.2	protein_coding	1	c.-46+2014_-46+2015insTGTTAGGAGCCAAGCTCCTAAGCCCT
chrA2	141074837	T	TGGCGCAAAGAACCACACGGCACTCCG	PASS	intron_variant	MODIFIER	LOC101093011	LOC101093011	transcript	XM_023250528.2	protein_coding	1	c.-46+2018_-46+2019insGGCGCAAAGAACCACACGGCACTCCG
chrA2	141857099	A	G	PASS	intron_variant	MODIFIER	POT1	POT1	transcript	XM_006929341.5	protein_coding	7	c.565+5986T>C
chrA2	141976481	TTATAA	T	PASS	intergenic_region	MODIFIER	LOC101097630-LOC111559538	LOC101097630-LOC111559538	intergenic_region	LOC101097630-LOC111559538		-1	n.141976482_141976486delTATAA
chrA2	142239945	C	T	PASS	intron_variant	MODIFIER	LOC123384013	LOC123384013	transcript	XR_006594498.1	pseudogene	3	n.280-9513G>A
chrA2	142279428	C	T	PASS	intron_variant	MODIFIER	LOC123384013	LOC123384013	transcript	XR_006594498.1	pseudogene	3	n.279+12286G>A
chrA2	142559980	A	G	PASS	intron_variant	MODIFIER	LOC123384014	LOC123384014	transcript	XR_006594503.1	pseudogene	1	n.137-3470A>G
chrA2	142566658	C	T	PASS	intron_variant	MODIFIER	LOC123384014	LOC123384014	transcript	XR_006594502.1	pseudogene	2	n.193-1819C>T
chrA2	142583103	C	T	PASS	intergenic_region	MODIFIER	LOC123384014-LOC123383995	LOC123384014-LOC123383995	intergenic_region	LOC123384014-LOC123383995		-1	n.142583103C>T
chrA2	142593009	G	T	PASS	intergenic_region	MODIFIER	LOC123384014-LOC123383995	LOC123384014-LOC123383995	intergenic_region	LOC123384014-LOC123383995		-1	n.142593009G>T
chrA2	142593280	G	T	PASS	intergenic_region	MODIFIER	LOC123384014-LOC123383995	LOC123384014-LOC123383995	intergenic_region	LOC123384014-LOC123383995		-1	n.142593280G>T
chrA2	142605195	C	CTTTTGGACAT	PASS	intergenic_region	MODIFIER	LOC123384014-LOC123383995	LOC123384014-LOC123383995	intergenic_region	LOC123384014-LOC123383995		-1	n.142605195_142605196insTTTTGGACAT
chrA2	142605198	G	GGGA	PASS	intergenic_region	MODIFIER	LOC123384014-LOC123383995	LOC123384014-LOC123383995	intergenic_region	LOC123384014-LOC123383995		-1	n.142605198_142605199insGGA
chrA2	142605199	C	CAAACTTAT	PASS	intergenic_region	MODIFIER	LOC123384014-LOC123383995	LOC123384014-LOC123383995	intergenic_region	LOC123384014-LOC123383995		-1	n.142605199_142605200insAAACTTAT
chrA2	142605201	C	T	PASS	intergenic_region	MODIFIER	LOC123384014-LOC123383995	LOC123384014-LOC123383995	intergenic_region	LOC123384014-LOC123383995		-1	n.142605201C>T
chrA2	142605203	G	GATGGAAGAAA	PASS	intergenic_region	MODIFIER	LOC123384014-LOC123383995	LOC123384014-LOC123383995	intergenic_region	LOC123384014-LOC123383995		-1	n.142605203_142605204insATGGAAGAAA
chrA2	142605204	TCTC	T	PASS	intergenic_region	MODIFIER	LOC123384014-LOC123383995	LOC123384014-LOC123383995	intergenic_region	LOC123384014-LOC123383995		-1	n.142605205_142605207delCTC
chrA2	142605209	C	CAGA	PASS	intergenic_region	MODIFIER	LOC123384014-LOC123383995	LOC123384014-LOC123383995	intergenic_region	LOC123384014-LOC123383995		-1	n.142605209_142605210insAGA
chrA2	142605215	A	ATATGTTTAAAGT	PASS	intergenic_region	MODIFIER	LOC123384014-LOC123383995	LOC123384014-LOC123383995	intergenic_region	LOC123384014-LOC123383995		-1	n.142605215_142605216insTATGTTTAAAGT
chrA2	142612616	T	G	PASS	intergenic_region	MODIFIER	LOC123384014-LOC123383995	LOC123384014-LOC123383995	intergenic_region	LOC123384014-LOC123383995		-1	n.142612616T>G
chrA2	142705987	G	A	PASS	intragenic_variant	MODIFIER	LOC123383995	LOC123383995	gene_variant	LOC123383995		-1	n.142705987G>A
chrA2	142730070	G	GAA	PASS	intragenic_variant	MODIFIER	LOC123383995	LOC123383995	gene_variant	LOC123383995		-1	n.142730070_142730071insAA
chrA2	142731146	A	ATATATATATG	PASS	intragenic_variant	MODIFIER	LOC123383995	LOC123383995	gene_variant	LOC123383995		-1	n.142731146_142731147insTATATATATG
chrA2	142731178	G	A	PASS	intragenic_variant	MODIFIER	LOC123383995	LOC123383995	gene_variant	LOC123383995		-1	n.142731178G>A
chrA2	142748859	G	A	PASS	intergenic_region	MODIFIER	LOC123383995-LOC105260317	LOC123383995-LOC105260317	intergenic_region	LOC123383995-LOC105260317		-1	n.142748859G>A
chrA2	143326328	C	T	PASS	intron_variant	MODIFIER	GRM8	GRM8	transcript	XM_011280531.4	protein_coding	8	c.1494+6824G>A
chrA2	143491892	T	C	PASS	intron_variant	MODIFIER	GRM8	GRM8	transcript	XM_011280531.4	protein_coding	6	c.1157-17718A>G
chrA2	143809270	T	G	PASS	intron_variant	MODIFIER	GRM8	GRM8	transcript	XM_011280531.4	protein_coding	2	c.511-4826A>C
chrA2	143809405	ACT	A	PASS	intron_variant	MODIFIER	GRM8	GRM8	transcript	XM_011280531.4	protein_coding	2	c.511-4963_511-4962delAG
chrA2	144003143	G	A	PASS	intergenic_region	MODIFIER	GRM8-ZNF800	GRM8-ZNF800	intergenic_region	GRM8-ZNF800		-1	n.144003143G>A
chrA2	144197408	AAAGGGAGAGAGAGAGGAAGGAAGGAAGGAAGG	A	PASS	intron_variant	MODIFIER	LOC109497586	LOC109497586	transcript	XR_002740592.2	pseudogene	2	n.1021-11325_1021-11294delCCTTCCTTCCTTCCTTCCTCTCTCTCTCCCTT
chrA2	144197508	C	CTTTG	PASS	intron_variant	MODIFIER	LOC109497586	LOC109497586	transcript	XR_002740592.2	pseudogene	2	n.1021-11394_1021-11393insCAAA
chrA2	144197543	A	C	PASS	intron_variant	MODIFIER	LOC109497586	LOC109497586	transcript	XR_002740592.2	pseudogene	2	n.1021-11428T>G
chrA2	144606286	A	AGT	PASS	intron_variant	MODIFIER	SND1	SND1	transcript	XM_011280535.4	protein_coding	16	c.1779+12690_1779+12691insGT
chrA2	144687283	GGGGGT	G	PASS	intron_variant	MODIFIER	SND1	SND1	transcript	XM_011280535.4	protein_coding	22	c.2622+264_2622+268delGGGGT
chrA2	144818224	TTC	T	PASS	intergenic_region	MODIFIER	SND1-LOC109497595	SND1-LOC109497595	intergenic_region	SND1-LOC109497595		-1	n.144818225_144818226delTC
chrA2	144912337	ATTT	A	PASS	upstream_gene_variant	MODIFIER	RBM28	RBM28	transcript	XM_019825765.3	protein_coding	-1	c.-382_-380delAAA
chrA2	144917679	T	C	PASS	downstream_gene_variant	MODIFIER	PRRT4	PRRT4	transcript	XM_023250534.2	protein_coding	-1	c.*779A>G
chrA2	144918412	C	T	PASS	3_prime_UTR_variant	MODIFIER	PRRT4	PRRT4	transcript	XM_023250534.2	protein_coding	5	c.*46G>A
chrA2	144920774	G	A	PASS	intron_variant	MODIFIER	PRRT4	PRRT4	transcript	XM_023250534.2	protein_coding	4	c.872-491C>T
chrA2	144924071	G	C	PASS	intron_variant	MODIFIER	PRRT4	PRRT4	transcript	XM_023250534.2	protein_coding	4	c.871+1112C>G
chrA2	144924818	C	T	PASS	intron_variant	MODIFIER	PRRT4	PRRT4	transcript	XM_023250534.2	protein_coding	4	c.871+365G>A
chrA2	144924912	C	G	PASS	intron_variant	MODIFIER	PRRT4	PRRT4	transcript	XM_023250534.2	protein_coding	4	c.871+271G>C
chrA2	144927292	G	T	PASS	5_prime_UTR_variant	MODIFIER	PRRT4	PRRT4	transcript	XM_023250535.2	protein_coding	1	c.-805C>A
chrA2	144929196	G	C	PASS	upstream_gene_variant	MODIFIER	PRRT4	PRRT4	transcript	XM_023250534.2	protein_coding	-1	c.-1433C>G
chrA2	144933284	C	T	PASS	intergenic_region	MODIFIER	PRRT4-IMPDH1	PRRT4-IMPDH1	intergenic_region	PRRT4-IMPDH1		-1	n.144933284C>T
chrA2	144954917	G	A	PASS	intron_variant	MODIFIER	IMPDH1	IMPDH1	transcript	XM_023250537.2	protein_coding	2	c.272+679C>T
chrA2	145004159	T	TTTCTTTC	PASS	intergenic_region	MODIFIER	HILPDA-FAM71F2	HILPDA-FAM71F2	intergenic_region	HILPDA-FAM71F2		-1	n.145004159_145004160insTTCTTTC
chrA2	145012771	C	T	PASS	intron_variant	MODIFIER	FAM71F2	FAM71F2	transcript	XM_003983013.6	protein_coding	1	c.154-784C>T
chrA2	145018922	C	T	PASS	intron_variant	MODIFIER	FAM71F2	FAM71F2	transcript	XM_003983013.6	protein_coding	4	c.707+338C>T
chrA2	145019710	AAATT	A	PASS	intron_variant	MODIFIER	FAM71F2	FAM71F2	transcript	XM_003983013.6	protein_coding	4	c.707+1127_707+1130delAATT
chrA2	145024489	C	T	PASS	downstream_gene_variant	MODIFIER	FAM71F2	FAM71F2	transcript	XM_003983013.6	protein_coding	-1	c.*711C>T
chrA2	145058044	G	A	PASS	upstream_gene_variant	MODIFIER	CALU	CALU	transcript	XM_003983016.6	protein_coding	-1	c.-3546G>A
chrA2	145058068	C	T	PASS	upstream_gene_variant	MODIFIER	CALU	CALU	transcript	XM_003983016.6	protein_coding	-1	c.-3522C>T
chrA2	145059497	G	A	PASS	upstream_gene_variant	MODIFIER	CALU	CALU	transcript	XM_003983016.6	protein_coding	-1	c.-2093G>A
chrA2	145060022	T	C	PASS	upstream_gene_variant	MODIFIER	CALU	CALU	transcript	XM_003983016.6	protein_coding	-1	c.-1568T>C
chrA2	145061634	G	T	PASS	intron_variant	MODIFIER	CALU	CALU	transcript	XM_003983016.6	protein_coding	1	c.-12+56G>T
chrA2	145061813	C	G	PASS	intron_variant	MODIFIER	CALU	CALU	transcript	XM_003983016.6	protein_coding	1	c.-12+235C>G
chrA2	145062881	C	T	PASS	intron_variant	MODIFIER	CALU	CALU	transcript	XM_003983016.6	protein_coding	1	c.-12+1303C>T
chrA2	145064208	G	A	PASS	intron_variant	MODIFIER	CALU	CALU	transcript	XM_003983016.6	protein_coding	1	c.-12+2630G>A
chrA2	145065555	T	C	PASS	intron_variant	MODIFIER	CALU	CALU	transcript	XM_003983016.6	protein_coding	1	c.-12+3977T>C
chrA2	145066603	T	TCTCC	PASS	intron_variant	MODIFIER	CALU	CALU	transcript	XM_003983016.6	protein_coding	1	c.-12+5025_-12+5026insCTCC
chrA2	145066773	AAAAAG	A	PASS	intron_variant	MODIFIER	CALU	CALU	transcript	XM_003983016.6	protein_coding	1	c.-11-5103_-11-5099delAAAAG
chrA2	145085910	T	TC	PASS	intron_variant	MODIFIER	CALU	CALU	transcript	XM_003983016.6	protein_coding	5	c.644-2211_644-2210insC
chrA2	145095330	A	G	PASS	downstream_gene_variant	MODIFIER	CALU	CALU	transcript	XM_003983016.6	protein_coding	-1	c.*5409A>G
chrA2	145282716	G	A	PASS	intron_variant	MODIFIER	TNPO3	TNPO3	transcript	XM_023250549.2	protein_coding	5	c.697-961C>T
chrA2	145303962	T	C	PASS	upstream_gene_variant	MODIFIER	TNPO3	TNPO3	transcript	XM_045052736.1	protein_coding	-1	c.-3534A>G
chrA2	145304544	AAAC	A	PASS	upstream_gene_variant	MODIFIER	TNPO3	TNPO3	transcript	XM_045052736.1	protein_coding	-1	c.-4119_-4117delGTT
chrA2	145315519	GAAT	G	PASS	intron_variant	MODIFIER	TNPO3	TNPO3	transcript	XM_023250549.2	protein_coding	1	c.120+6030_120+6032delATT
chrA2	145318941	G	A	PASS	intron_variant	MODIFIER	TNPO3	TNPO3	transcript	XM_023250549.2	protein_coding	1	c.120+2611C>T
chrA2	145323539	A	T	PASS	upstream_gene_variant	MODIFIER	TNPO3	TNPO3	transcript	XM_023250549.2	protein_coding	-1	c.-1868T>A
chrA2	145775825	C	T	PASS	intron_variant	MODIFIER	NRF1	NRF1	transcript	XM_023250560.2	protein_coding	1	c.-10+18644C>T
chrA2	145782157	G	C	PASS	intron_variant	MODIFIER	NRF1	NRF1	transcript	XM_023250560.2	protein_coding	1	c.-9-23996G>C
chrA2	145838385	T	C	PASS	intron_variant	MODIFIER	NRF1	NRF1	transcript	XM_023250560.2	protein_coding	5	c.606+1378T>C
chrA2	146116548	C	T	PASS	intergenic_region	MODIFIER	LOC123384028-ZC3HC1	LOC123384028-ZC3HC1	intergenic_region	LOC123384028-ZC3HC1		-1	n.146116548C>T
chrA2	146118078	G	A	PASS	intergenic_region	MODIFIER	LOC123384028-ZC3HC1	LOC123384028-ZC3HC1	intergenic_region	LOC123384028-ZC3HC1		-1	n.146118078G>A
chrA2	146118724	G	A	PASS	intergenic_region	MODIFIER	LOC123384028-ZC3HC1	LOC123384028-ZC3HC1	intergenic_region	LOC123384028-ZC3HC1		-1	n.146118724G>A
chrA2	146120559	G	A	PASS	intergenic_region	MODIFIER	LOC123384028-ZC3HC1	LOC123384028-ZC3HC1	intergenic_region	LOC123384028-ZC3HC1		-1	n.146120559G>A
chrA2	146156332	A	G	PASS	upstream_gene_variant	MODIFIER	ZC3HC1	ZC3HC1	transcript	XM_003983043.5	protein_coding	-1	c.-3483T>C
chrA2	146156352	C	T	PASS	upstream_gene_variant	MODIFIER	ZC3HC1	ZC3HC1	transcript	XM_003983043.5	protein_coding	-1	c.-3503G>A
chrA2	146247255	G	A	PASS	downstream_gene_variant	MODIFIER	TMEM209	TMEM209	transcript	XM_011280543.4	protein_coding	-1	c.*4614C>T
chrA2	146287771	AAAC	A	PASS	upstream_gene_variant	MODIFIER	TMEM209	TMEM209	transcript	XM_011280543.4	protein_coding	-1	c.-2544_-2542delGTT
chrA2	146321022	G	A	PASS	upstream_gene_variant	MODIFIER	CPA2	CPA2	transcript	XM_003983050.6	protein_coding	-1	c.-670G>A
chrA2	146434725	G	A	PASS	intron_variant	MODIFIER	CEP41	CEP41	transcript	XM_006929373.5	protein_coding	8	c.661-84C>T
chrA2	146539250	ACT	A	PASS	downstream_gene_variant	MODIFIER	LOC109497611	LOC109497611	transcript	XR_006594575.1	pseudogene	-1	n.*2306_*2307delAG
chrA2	146568879	GGGGTGGGAGGTGGGGAT	G	PASS	intron_variant	MODIFIER	COPG2	COPG2	transcript	XM_023250572.2	protein_coding	20	c.2150-19822_2150-19806delATCCCCACCTCCCACCC
chrA2	146589945	T	G	PASS	intron_variant	MODIFIER	COPG2	COPG2	transcript	XM_023250572.2	protein_coding	20	c.2149+3430A>C
chrA2	146600717	C	CG	PASS	intron_variant	MODIFIER	COPG2	COPG2	transcript	XM_023250572.2	protein_coding	14	c.1468+66_1468+67insC
chrA2	146607364	C	CA	PASS	intron_variant	MODIFIER	COPG2	COPG2	transcript	XM_023250572.2	protein_coding	11	c.939+1184_939+1185insT
chrA2	146616232	C	T	PASS	intron_variant	MODIFIER	COPG2	COPG2	transcript	XM_023250572.2	protein_coding	9	c.738-6929G>A
chrA2	146616582	T	C	PASS	intron_variant	MODIFIER	COPG2	COPG2	transcript	XM_023250572.2	protein_coding	9	c.738-7279A>G
chrA2	146619811	C	T	PASS	intron_variant	MODIFIER	COPG2	COPG2	transcript	XM_023250572.2	protein_coding	9	c.738-10508G>A
chrA2	146629604	C	T	PASS	intron_variant	MODIFIER	COPG2	COPG2	transcript	XM_023250572.2	protein_coding	9	c.737+2728G>A
chrA2	146633905	C	T	PASS	intron_variant	MODIFIER	COPG2	COPG2	transcript	XM_023250572.2	protein_coding	7	c.493-289G>A
chrA2	146637610	AG	A	PASS	intron_variant	MODIFIER	COPG2	COPG2	transcript	XM_023250572.2	protein_coding	5	c.324-1333delC
chrA2	146637907	C	T	PASS	intron_variant	MODIFIER	COPG2	COPG2	transcript	XM_023250572.2	protein_coding	5	c.324-1629G>A
chrA2	146640728	C	T	PASS	intron_variant	MODIFIER	COPG2	COPG2	transcript	XM_023250572.2	protein_coding	5	c.323+3944G>A
chrA2	146642287	T	C	PASS	start_lost	HIGH	COPG2	COPG2	transcript	XM_045052760.1	protein_coding	1	c.1A>G	p.Met1?
chrA2	146650125	G	A	PASS	intron_variant	MODIFIER	COPG2	COPG2	transcript	XM_023250572.2	protein_coding	4	c.244-5374C>T
chrA2	146650729	G	A	PASS	intron_variant	MODIFIER	COPG2	COPG2	transcript	XM_023250572.2	protein_coding	4	c.244-5978C>T
chrA2	146661348	C	T	PASS	downstream_gene_variant	MODIFIER	TSGA13	TSGA13	transcript	XM_006929378.4	protein_coding	-1	c.*3778G>A
chrA2	146760869	CCCCA	C	PASS	upstream_gene_variant	MODIFIER	TSGA13	TSGA13	transcript	XM_006929378.4	protein_coding	-1	c.-3089_-3086delTGGG
chrA2	146772102	C	T	PASS	intergenic_region	MODIFIER	TSGA13-LOC123384032	TSGA13-LOC123384032	intergenic_region	TSGA13-LOC123384032		-1	n.146772102C>T
chrA2	146776675	A	C	PASS	intergenic_region	MODIFIER	TSGA13-LOC123384032	TSGA13-LOC123384032	intergenic_region	TSGA13-LOC123384032		-1	n.146776675A>C
chrA2	146801184	AGAGT	A	PASS	intron_variant	MODIFIER	LOC123384032	LOC123384032	transcript	XR_006594576.1	pseudogene	1	n.620-5940_620-5937delACTC
chrA2	146826796	G	C	PASS	upstream_gene_variant	MODIFIER	LOC123384032	LOC123384032	transcript	XR_006594576.1	pseudogene	-1	n.-775C>G
chrA2	146827501	G	A	PASS	upstream_gene_variant	MODIFIER	LOC123384032	LOC123384032	transcript	XR_006594576.1	pseudogene	-1	n.-1480C>T
chrA2	146838736	T	C	PASS	intergenic_region	MODIFIER	LOC123384032-LOC101093924	LOC123384032-LOC101093924	intergenic_region	LOC123384032-LOC101093924		-1	n.146838736T>C
chrA2	146871234	C	T	PASS	intergenic_region	MODIFIER	LOC123384032-LOC101093924	LOC123384032-LOC101093924	intergenic_region	LOC123384032-LOC101093924		-1	n.146871234C>T
chrA2	146871624	G	A	PASS	intergenic_region	MODIFIER	LOC123384032-LOC101093924	LOC123384032-LOC101093924	intergenic_region	LOC123384032-LOC101093924		-1	n.146871624G>A
chrA2	146873448	G	A	PASS	intergenic_region	MODIFIER	LOC123384032-LOC101093924	LOC123384032-LOC101093924	intergenic_region	LOC123384032-LOC101093924		-1	n.146873448G>A
chrA2	146879951	G	A	PASS	intergenic_region	MODIFIER	LOC123384032-LOC101093924	LOC123384032-LOC101093924	intergenic_region	LOC123384032-LOC101093924		-1	n.146879951G>A
chrA2	146880528	T	A	PASS	intergenic_region	MODIFIER	LOC123384032-LOC101093924	LOC123384032-LOC101093924	intergenic_region	LOC123384032-LOC101093924		-1	n.146880528T>A
chrA2	146880736	G	A	PASS	intergenic_region	MODIFIER	LOC123384032-LOC101093924	LOC123384032-LOC101093924	intergenic_region	LOC123384032-LOC101093924		-1	n.146880736G>A
chrA2	146881448	G	A	PASS	intergenic_region	MODIFIER	LOC123384032-LOC101093924	LOC123384032-LOC101093924	intergenic_region	LOC123384032-LOC101093924		-1	n.146881448G>A
chrA2	146881450	C	T	PASS	intergenic_region	MODIFIER	LOC123384032-LOC101093924	LOC123384032-LOC101093924	intergenic_region	LOC123384032-LOC101093924		-1	n.146881450C>T
chrA2	146881452	G	A	PASS	intergenic_region	MODIFIER	LOC123384032-LOC101093924	LOC123384032-LOC101093924	intergenic_region	LOC123384032-LOC101093924		-1	n.146881452G>A
chrA2	146881868	G	A	PASS	intergenic_region	MODIFIER	LOC123384032-LOC101093924	LOC123384032-LOC101093924	intergenic_region	LOC123384032-LOC101093924		-1	n.146881868G>A
chrA2	146882838	C	T	PASS	intergenic_region	MODIFIER	LOC123384032-LOC101093924	LOC123384032-LOC101093924	intergenic_region	LOC123384032-LOC101093924		-1	n.146882838C>T
chrA2	146932255	C	T	PASS	intergenic_region	MODIFIER	LOC123384032-LOC101093924	LOC123384032-LOC101093924	intergenic_region	LOC123384032-LOC101093924		-1	n.146932255C>T
chrA2	146965640	C	T	PASS	intergenic_region	MODIFIER	LOC123384032-LOC101093924	LOC123384032-LOC101093924	intergenic_region	LOC123384032-LOC101093924		-1	n.146965640C>T
chrA2	146979844	C	T	PASS	intergenic_region	MODIFIER	LOC123384032-LOC101093924	LOC123384032-LOC101093924	intergenic_region	LOC123384032-LOC101093924		-1	n.146979844C>T
chrA2	146988559	G	C	PASS	intragenic_variant	MODIFIER	LOC101093924	LOC101093924	gene_variant	LOC101093924		-1	n.146988559G>C
chrA2	146996033	G	A	PASS	intergenic_region	MODIFIER	LOC101093924-MKLN1	LOC101093924-MKLN1	intergenic_region	LOC101093924-MKLN1		-1	n.146996033G>A
chrA2	147017368	T	C	PASS	intergenic_region	MODIFIER	LOC101093924-MKLN1	LOC101093924-MKLN1	intergenic_region	LOC101093924-MKLN1		-1	n.147017368T>C
chrA2	147096730	C	T	PASS	intron_variant	MODIFIER	MKLN1	MKLN1	transcript	XM_003983064.6	protein_coding	2	c.17+14277C>T
chrA2	147122051	C	T	PASS	intron_variant	MODIFIER	MKLN1	MKLN1	transcript	XM_003983064.6	protein_coding	2	c.17+39598C>T
chrA2	147135372	C	T	PASS	downstream_gene_variant	MODIFIER	LOC109497614	LOC109497614	transcript	XR_002153924.3	pseudogene	-1	n.*1598G>A
chrA2	147178751	T	C	PASS	intron_variant	MODIFIER	MKLN1	MKLN1	transcript	XM_003983064.6	protein_coding	2	c.17+96298T>C
chrA2	147228367	A	C	PASS	intron_variant	MODIFIER	MKLN1	MKLN1	transcript	XM_003983064.6	protein_coding	2	c.18-65247A>C
chrA2	147233848	T	C	PASS	downstream_gene_variant	MODIFIER	LOC102901703	LOC102901703	transcript	XR_006594876.1	pseudogene	-1	n.*2555A>G
chrA2	147245691	C	G	PASS	upstream_gene_variant	MODIFIER	MKLN1	MKLN1	transcript	XM_003983063.6	protein_coding	-1	c.-109C>G
chrA2	147271790	G	A	PASS	intron_variant	MODIFIER	MKLN1	MKLN1	transcript	XM_003983063.6	protein_coding	1	c.99-21824G>A
chrA2	147304103	C	A	PASS	intron_variant	MODIFIER	MKLN1	MKLN1	transcript	XM_003983063.6	protein_coding	2	c.168+10420C>A
chrA2	147343611	C	T	PASS	intron_variant	MODIFIER	MKLN1	MKLN1	transcript	XM_003983063.6	protein_coding	6	c.704-4496C>T
chrA2	147370051	C	T	PASS	intron_variant	MODIFIER	MKLN1	MKLN1	transcript	XM_003983063.6	protein_coding	9	c.961-382C>T
chrA2	147399735	T	G	PASS	intron_variant	MODIFIER	MKLN1	MKLN1	transcript	XM_003983063.6	protein_coding	13	c.1673+169T>G
chrA2	147403139	G	A	PASS	intron_variant	MODIFIER	MKLN1	MKLN1	transcript	XM_003983063.6	protein_coding	13	c.1674-566G>A
chrA2	147412753	G	A	PASS	intron_variant	MODIFIER	MKLN1	MKLN1	transcript	XM_003983063.6	protein_coding	16	c.2031+274G>A
chrA2	147442160	TTTC	T	PASS	downstream_gene_variant	MODIFIER	PODXL	PODXL	transcript	XM_003983072.5	protein_coding	-1	c.*8034_*8036delGAA
chrA2	147470186	C	G	PASS	intron_variant	MODIFIER	PODXL	PODXL	transcript	XM_003983072.5	protein_coding	1	c.68-11829G>C
chrA2	147518145	CA	C	PASS	intron_variant	MODIFIER	LOC109497801	LOC109497801	transcript	XR_006594577.1	pseudogene	4	n.975+967delT
chrA2	147521981	G	A	PASS	intron_variant	MODIFIER	LOC109497801	LOC109497801	transcript	XR_006594577.1	pseudogene	3	n.727-2620C>T
chrA2	147552256	A	T	PASS	intron_variant	MODIFIER	LOC109497801	LOC109497801	transcript	XR_006594577.1	pseudogene	1	n.478+219T>A
chrA2	147570186	G	GCCGTTCCCCCTTGC	PASS	intergenic_region	MODIFIER	LOC109497801-LOC102901767	LOC109497801-LOC102901767	intergenic_region	LOC109497801-LOC102901767		-1	n.147570186_147570187insCCGTTCCCCCTTGC
chrA2	147570190	C	G	PASS	intergenic_region	MODIFIER	LOC109497801-LOC102901767	LOC109497801-LOC102901767	intergenic_region	LOC109497801-LOC102901767		-1	n.147570190C>G
chrA2	147868918	G	T	PASS	intron_variant	MODIFIER	LOC109497618	LOC109497618	transcript	XR_006594584.1	pseudogene	3	n.1130-3221G>T
chrA2	149127439	G	A	PASS	intron_variant	MODIFIER	EXOC4	EXOC4	transcript	XM_003983067.5	protein_coding	7	c.1185+4296G>A
chrA2	149127808	GTTC	G	PASS	intron_variant	MODIFIER	EXOC4	EXOC4	transcript	XM_003983067.5	protein_coding	7	c.1185+4666_1185+4668delTTC
chrA2	149128447	G	A	PASS	intron_variant	MODIFIER	EXOC4	EXOC4	transcript	XM_003983067.5	protein_coding	7	c.1185+5304G>A
chrA2	149132784	GT	G	PASS	intron_variant	MODIFIER	EXOC4	EXOC4	transcript	XM_003983067.5	protein_coding	7	c.1185+9642delT
chrA2	149143961	A	G	PASS	intron_variant	MODIFIER	EXOC4	EXOC4	transcript	XM_003983067.5	protein_coding	7	c.1185+20818A>G
chrA2	149153736	A	T	PASS	intron_variant	MODIFIER	EXOC4	EXOC4	transcript	XM_003983067.5	protein_coding	7	c.1185+30593A>T
chrA2	149158990	A	G	PASS	intron_variant	MODIFIER	EXOC4	EXOC4	transcript	XM_003983067.5	protein_coding	7	c.1185+35847A>G
chrA2	149159787	A	T	PASS	intron_variant	MODIFIER	EXOC4	EXOC4	transcript	XM_003983067.5	protein_coding	7	c.1185+36644A>T
chrA2	149193667	C	T	PASS	intron_variant	MODIFIER	EXOC4	EXOC4	transcript	XM_003983067.5	protein_coding	7	c.1186-27030C>T
chrA2	149200708	A	G	PASS	intron_variant	MODIFIER	EXOC4	EXOC4	transcript	XM_003983067.5	protein_coding	7	c.1186-19989A>G
chrA2	149201687	G	A	PASS	intron_variant	MODIFIER	EXOC4	EXOC4	transcript	XM_003983067.5	protein_coding	7	c.1186-19010G>A
chrA2	149219528	TC	T	PASS	intron_variant	MODIFIER	EXOC4	EXOC4	transcript	XM_003983067.5	protein_coding	7	c.1186-1168delC
chrA2	149219530	TTCTTCTTCTTCTTCTTCTTCTTCTTCTTCTTC	T	PASS	intron_variant	MODIFIER	EXOC4	EXOC4	transcript	XM_003983067.5	protein_coding	7	c.1186-1166_1186-1135delTCTTCTTCTTCTTCTTCTTCTTCTTCTTCTTC
chrA2	149231941	CAAACA	C	PASS	intron_variant	MODIFIER	EXOC4	EXOC4	transcript	XM_003983067.5	protein_coding	9	c.1420+6336_1420+6340delAAACA
chrA2	149236099	T	C	PASS	intron_variant	MODIFIER	EXOC4	EXOC4	transcript	XM_003983067.5	protein_coding	9	c.1420+10493T>C
chrA2	149239110	G	A	PASS	intron_variant	MODIFIER	EXOC4	EXOC4	transcript	XM_003983067.5	protein_coding	9	c.1420+13504G>A
chrA2	149249402	C	T	PASS	intron_variant	MODIFIER	EXOC4	EXOC4	transcript	XM_003983067.5	protein_coding	9	c.1420+23796C>T
chrA2	149252111	C	CCATCACCAGCAGCTAGTGCTGAGGTATAAATAATAAACTAAGGCATTATAAGTCCTCTTCT	PASS	intron_variant	MODIFIER	EXOC4	EXOC4	transcript	XM_003983067.5	protein_coding	9	c.1420+26505_1420+26506insCATCACCAGCAGCTAGTGCTGAGGTATAAATAATAAACTAAGGCATTATAAGTCCTCTTCT
chrA2	149258013	G	A	PASS	intron_variant	MODIFIER	EXOC4	EXOC4	transcript	XM_003983067.5	protein_coding	9	c.1420+32407G>A
chrA2	149258905	A	T	PASS	intron_variant	MODIFIER	EXOC4	EXOC4	transcript	XM_003983067.5	protein_coding	9	c.1420+33299A>T
chrA2	149259680	T	G	PASS	intron_variant	MODIFIER	EXOC4	EXOC4	transcript	XM_003983067.5	protein_coding	9	c.1420+34074T>G
chrA2	149262000	T	G	PASS	intron_variant	MODIFIER	EXOC4	EXOC4	transcript	XM_003983067.5	protein_coding	9	c.1420+36394T>G
chrA2	149262003	T	G	PASS	intron_variant	MODIFIER	EXOC4	EXOC4	transcript	XM_003983067.5	protein_coding	9	c.1420+36397T>G
chrA2	149264232	A	C	PASS	intron_variant	MODIFIER	EXOC4	EXOC4	transcript	XM_003983067.5	protein_coding	9	c.1420+38626A>C
chrA2	149264975	T	C	PASS	intron_variant	MODIFIER	EXOC4	EXOC4	transcript	XM_003983067.5	protein_coding	9	c.1420+39369T>C
chrA2	149266665	C	T	PASS	intron_variant	MODIFIER	EXOC4	EXOC4	transcript	XM_003983067.5	protein_coding	9	c.1420+41059C>T
chrA2	149268615	A	C	PASS	intron_variant	MODIFIER	EXOC4	EXOC4	transcript	XM_003983067.5	protein_coding	9	c.1420+43009A>C
chrA2	149269072	C	T	PASS	intron_variant	MODIFIER	EXOC4	EXOC4	transcript	XM_003983067.5	protein_coding	9	c.1420+43466C>T
chrA2	149274303	C	T	PASS	intron_variant	MODIFIER	EXOC4	EXOC4	transcript	XM_003983067.5	protein_coding	9	c.1420+48697C>T
chrA2	149277546	C	T	PASS	intron_variant	MODIFIER	EXOC4	EXOC4	transcript	XM_003983067.5	protein_coding	9	c.1420+51940C>T
chrA2	149287865	C	G	PASS	downstream_gene_variant	MODIFIER	EXOC4	EXOC4	transcript	XM_045052774.1	protein_coding	-1	c.*1691C>G
chrA2	149295003	G	A	PASS	intron_variant	MODIFIER	EXOC4	EXOC4	transcript	XM_003983067.5	protein_coding	9	c.1421-66516G>A
chrA2	149296558	T	C	PASS	intron_variant	MODIFIER	EXOC4	EXOC4	transcript	XM_003983067.5	protein_coding	9	c.1421-64961T>C
chrA2	149297603	AAG	A	PASS	intron_variant	MODIFIER	EXOC4	EXOC4	transcript	XM_003983067.5	protein_coding	9	c.1421-63915_1421-63914delAG
chrA2	149298001	G	T	PASS	intron_variant	MODIFIER	EXOC4	EXOC4	transcript	XM_003983067.5	protein_coding	9	c.1421-63518G>T
chrA2	149318579	C	T	PASS	intron_variant	MODIFIER	EXOC4	EXOC4	transcript	XM_003983067.5	protein_coding	9	c.1421-42940C>T
chrA2	149329930	C	T	PASS	downstream_gene_variant	MODIFIER	EXOC4	EXOC4	transcript	XM_045052770.1	protein_coding	-1	c.*825C>T
chrA2	151752193	G	A	PASS	intron_variant	MODIFIER	LOC111557297	LOC111557297	transcript	XR_006594618.1	pseudogene	5	n.731-12189G>A
chrA2	152756740	CCCCACT	C	PASS	intron_variant	MODIFIER	DGKI	DGKI	transcript	XM_023250594.2	protein_coding	1	c.414-24401_414-24396delAGTGGG
chrA2	154630183	G	A	PASS	intron_variant	MODIFIER	TBXAS1	TBXAS1	transcript	XM_011280571.4	protein_coding	9	c.1132-11655G>A
chrA2	156189081	C	T	PASS	upstream_gene_variant	MODIFIER	LOC101083668	LOC101083668	transcript	XM_045052874.1	protein_coding	-1	c.-3458C>T
chrA2	156298382	T	C	PASS	intron_variant	MODIFIER	MGAM	MGAM	transcript	XM_011280590.4	protein_coding	3	c.222+1031T>C
chrA2	156773212	GAATGA	G	PASS	upstream_gene_variant	MODIFIER	LOC101097801	LOC101097801	transcript	XM_019825942.3	protein_coding	-1	c.-3986_-3982delTCATT
chrA2	156783582	G	A	PASS	intergenic_region	MODIFIER	LOC101097801-EPHB6	LOC101097801-EPHB6	intergenic_region	LOC101097801-EPHB6		-1	n.156783582G>A
chrA2	156791240	A	C	PASS	intergenic_region	MODIFIER	LOC101097801-EPHB6	LOC101097801-EPHB6	intergenic_region	LOC101097801-EPHB6		-1	n.156791240A>C
chrA2	159823321	A	AAAC	PASS	intron_variant	MODIFIER	CNTNAP2	CNTNAP2	transcript	XM_023250688.2	protein_coding	1	c.98-228863_98-228862insAAC
chrA2	159907985	A	AATTCTTTCAATTTCAGGGTATATTTTATACTTGCAACCATCTCATTTTGAACTAGCCACAATACAC	PASS	intron_variant	MODIFIER	CNTNAP2	CNTNAP2	transcript	XM_023250688.2	protein_coding	1	c.98-144199_98-144198insATTCTTTCAATTTCAGGGTATATTTTATACTTGCAACCATCTCATTTTGAACTAGCCACAATACAC
chrA2	161530184	A	G	PASS	downstream_gene_variant	MODIFIER	LOC109497684	LOC109497684	transcript	XR_002740643.2	pseudogene	-1	n.*822T>C
chrA2	161530273	C	T	PASS	downstream_gene_variant	MODIFIER	LOC109497684	LOC109497684	transcript	XR_002740643.2	pseudogene	-1	n.*733G>A
chrA2	162793567	A	G	PASS	intergenic_region	MODIFIER	LOC111557487-GIMAP6	LOC111557487-GIMAP6	intergenic_region	LOC111557487-GIMAP6		-1	n.162793567A>G
chrA2	162910765	C	T	PASS	intron_variant	MODIFIER	LOC123384088	LOC123384088	transcript	XM_045053016.1	protein_coding	1	c.-104+556G>A
chrA2	165083148	T	C	PASS	intergenic_region	MODIFIER	LOC109497703-LOC109497309	LOC109497703-LOC109497309	intergenic_region	LOC109497703-LOC109497309		-1	n.165083148T>C
chrA2	165434836	C	T	PASS	intron_variant	MODIFIER	DPP6	DPP6	transcript	XM_045053301.1	protein_coding	1	c.60+185278C>T
chrA2	165446213	C	T	PASS	intron_variant	MODIFIER	DPP6	DPP6	transcript	XM_045053301.1	protein_coding	1	c.60+196655C>T
chrA2	165450711	C	G	PASS	intron_variant	MODIFIER	DPP6	DPP6	transcript	XM_045053301.1	protein_coding	1	c.60+201153C>G
chrA2	165458241	G	A	PASS	intron_variant	MODIFIER	DPP6	DPP6	transcript	XM_045053301.1	protein_coding	1	c.60+208683G>A
chrA2	165461509	C	T	PASS	intron_variant	MODIFIER	DPP6	DPP6	transcript	XM_045053301.1	protein_coding	1	c.60+211951C>T
chrA2	165463891	T	C	PASS	intron_variant	MODIFIER	DPP6	DPP6	transcript	XM_045053301.1	protein_coding	1	c.60+214333T>C
chrA2	165536415	G	A	PASS	intron_variant	MODIFIER	DPP6	DPP6	transcript	XM_045053297.1	protein_coding	1	c.243+51474G>A
chrA2	165536435	G	T	PASS	intron_variant	MODIFIER	DPP6	DPP6	transcript	XM_045053297.1	protein_coding	1	c.243+51494G>T
chrA2	165582007	G	A	PASS	intron_variant	MODIFIER	DPP6	DPP6	transcript	XM_045053297.1	protein_coding	1	c.243+97066G>A
chrA2	165587971	C	T	PASS	intron_variant	MODIFIER	DPP6	DPP6	transcript	XM_045053297.1	protein_coding	1	c.243+103030C>T
chrA2	165616680	C	T	PASS	intron_variant	MODIFIER	DPP6	DPP6	transcript	XM_045053297.1	protein_coding	1	c.243+131739C>T
chrA2	165617278	GTAT	G	PASS	intron_variant	MODIFIER	DPP6	DPP6	transcript	XM_045053297.1	protein_coding	1	c.243+132338_243+132340delTAT
chrA2	165617386	T	G	PASS	intron_variant	MODIFIER	DPP6	DPP6	transcript	XM_045053297.1	protein_coding	1	c.243+132445T>G
chrA2	165618734	T	C	PASS	intron_variant	MODIFIER	DPP6	DPP6	transcript	XM_045053297.1	protein_coding	1	c.243+133793T>C
chrA2	165620191	G	A	PASS	intron_variant	MODIFIER	DPP6	DPP6	transcript	XM_045053297.1	protein_coding	1	c.243+135250G>A
chrA2	165621168	T	C	PASS	intron_variant	MODIFIER	DPP6	DPP6	transcript	XM_045053297.1	protein_coding	1	c.243+136227T>C
chrA2	165621695	C	T	PASS	intron_variant	MODIFIER	DPP6	DPP6	transcript	XM_045053297.1	protein_coding	1	c.243+136754C>T
chrA2	165621718	CT	C	PASS	intron_variant	MODIFIER	DPP6	DPP6	transcript	XM_045053297.1	protein_coding	1	c.243+136778delT
chrA2	165621721	T	C	PASS	intron_variant	MODIFIER	DPP6	DPP6	transcript	XM_045053297.1	protein_coding	1	c.243+136780T>C
chrA2	165621723	T	A	PASS	intron_variant	MODIFIER	DPP6	DPP6	transcript	XM_045053297.1	protein_coding	1	c.243+136782T>A
chrA2	165622003	AT	A	PASS	intron_variant	MODIFIER	DPP6	DPP6	transcript	XM_045053297.1	protein_coding	1	c.243+137063delT
chrA2	165622950	T	TC	PASS	intron_variant	MODIFIER	DPP6	DPP6	transcript	XM_045053297.1	protein_coding	1	c.243+138009_243+138010insC
chrA2	165623061	A	G	PASS	intron_variant	MODIFIER	DPP6	DPP6	transcript	XM_045053297.1	protein_coding	1	c.243+138120A>G
chrA2	165623849	C	T	PASS	intron_variant	MODIFIER	DPP6	DPP6	transcript	XM_045053297.1	protein_coding	1	c.243+138908C>T
chrA2	165624149	T	C	PASS	intron_variant	MODIFIER	DPP6	DPP6	transcript	XM_045053297.1	protein_coding	1	c.243+139208T>C
chrA2	165624186	C	T	PASS	intron_variant	MODIFIER	DPP6	DPP6	transcript	XM_045053297.1	protein_coding	1	c.243+139245C>T
chrA2	165624215	G	A	PASS	intron_variant	MODIFIER	DPP6	DPP6	transcript	XM_045053297.1	protein_coding	1	c.243+139274G>A
chrA2	165624511	C	T	PASS	intron_variant	MODIFIER	DPP6	DPP6	transcript	XM_045053297.1	protein_coding	1	c.243+139570C>T
chrA2	165625129	C	T	PASS	intron_variant	MODIFIER	DPP6	DPP6	transcript	XM_045053297.1	protein_coding	1	c.243+140188C>T
chrA2	165626607	C	T	PASS	intron_variant	MODIFIER	DPP6	DPP6	transcript	XM_045053297.1	protein_coding	1	c.243+141666C>T
chrA2	165626671	C	T	PASS	intron_variant	MODIFIER	DPP6	DPP6	transcript	XM_045053297.1	protein_coding	1	c.243+141730C>T
chrA2	165627453	C	G	PASS	intron_variant	MODIFIER	DPP6	DPP6	transcript	XM_045053297.1	protein_coding	1	c.243+142512C>G
chrA2	165633765	A	C	PASS	intron_variant	MODIFIER	DPP6	DPP6	transcript	XM_045053297.1	protein_coding	1	c.243+148824A>C
chrA2	165637642	G	T	PASS	intron_variant	MODIFIER	DPP6	DPP6	transcript	XM_045053297.1	protein_coding	1	c.243+152701G>T
chrA2	165646426	C	T	PASS	intron_variant	MODIFIER	DPP6	DPP6	transcript	XM_045053297.1	protein_coding	1	c.243+161485C>T
chrA2	165699694	G	A	PASS	upstream_gene_variant	MODIFIER	LOC109497707	LOC109497707	transcript	XR_002154104.3	pseudogene	-1	n.-220C>T
chrA2	165737887	C	T	PASS	intron_variant	MODIFIER	DPP6	DPP6	transcript	XM_045053297.1	protein_coding	1	c.244-91073C>T
chrA2	165923136	A	T	PASS	intron_variant	MODIFIER	DPP6	DPP6	transcript	XM_045053297.1	protein_coding	5	c.627+2175A>T
chrA2	166205941	G	GGA	PASS	upstream_gene_variant	MODIFIER	LOC123384165	LOC123384165	transcript	XR_006594897.1	pseudogene	-1	n.-1494_-1493insGA
chrA2	166286799	G	A	PASS	intron_variant	MODIFIER	LOC123384164	LOC123384164	transcript	XM_045053303.1	protein_coding	1	c.571+7917G>A
chrA2	166301412	T	C	PASS	3_prime_UTR_variant	MODIFIER	LOC123384164	LOC123384164	transcript	XM_045053303.1	protein_coding	2	c.*141T>C
chrA2	166358799	G	A	PASS	intergenic_region	MODIFIER	HTR5A-LOC111559575	HTR5A-LOC111559575	intergenic_region	HTR5A-LOC111559575		-1	n.166358799G>A
chrA2	166363316	C	T	PASS	intergenic_region	MODIFIER	HTR5A-LOC111559575	HTR5A-LOC111559575	intergenic_region	HTR5A-LOC111559575		-1	n.166363316C>T
chrA2	166370298	A	G	PASS	downstream_gene_variant	MODIFIER	LOC111559575	LOC111559575	transcript	XR_006594902.1	pseudogene	-1	n.*2931T>C
chrA2	166394652	G	A	PASS	intergenic_region	MODIFIER	LOC111559575-INSIG1	LOC111559575-INSIG1	intergenic_region	LOC111559575-INSIG1		-1	n.166394652G>A
chrA2	166399772	T	TA	PASS	intergenic_region	MODIFIER	LOC111559575-INSIG1	LOC111559575-INSIG1	intergenic_region	LOC111559575-INSIG1		-1	n.166399772_166399773insA
chrA2	166416703	G	A	PASS	upstream_gene_variant	MODIFIER	INSIG1	INSIG1	transcript	XM_023250896.2	protein_coding	-1	c.-3169G>A
chrA2	166435846	C	T	PASS	downstream_gene_variant	MODIFIER	INSIG1	INSIG1	transcript	XM_023250896.2	protein_coding	-1	c.*5262C>T
chrA2	166443345	G	A	PASS	downstream_gene_variant	MODIFIER	LOC109497712	LOC109497712	transcript	XR_002154111.3	pseudogene	-1	n.*4884C>T
chrA2	166467913	G	A	PASS	intergenic_region	MODIFIER	LOC109497804-EN2	LOC109497804-EN2	intergenic_region	LOC109497804-EN2		-1	n.166467913G>A
chrA2	166469470	C	CG	PASS	intergenic_region	MODIFIER	LOC109497804-EN2	LOC109497804-EN2	intergenic_region	LOC109497804-EN2		-1	n.166469470_166469471insG
chrA2	166483257	G	A	PASS	intergenic_region	MODIFIER	LOC109497804-EN2	LOC109497804-EN2	intergenic_region	LOC109497804-EN2		-1	n.166483257G>A
chrA2	166491310	T	A	PASS	intergenic_region	MODIFIER	LOC109497804-EN2	LOC109497804-EN2	intergenic_region	LOC109497804-EN2		-1	n.166491310T>A
chrA2	166520242	GGGT	G	PASS	intron_variant	MODIFIER	EN2	EN2	transcript	XM_006929557.5	protein_coding	1	c.710-760_710-758delGGT
chrA2	166688204	C	T	PASS	upstream_gene_variant	MODIFIER	RBM33	RBM33	transcript	XM_045053289.1	protein_coding	-1	c.-5826C>T
chrA2	166703286	G	T	PASS	intron_variant	MODIFIER	RBM33	RBM33	transcript	XM_045053288.1	protein_coding	5	c.562-4070G>T
chrA2	166925993	C	T	PASS	intergenic_region	MODIFIER	SHH-LOC123384098	SHH-LOC123384098	intergenic_region	SHH-LOC123384098		-1	n.166925993C>T
chrA2	167243881	G	A	PASS	intergenic_region	MODIFIER	LOC102900227-LOC123384099	LOC102900227-LOC123384099	intergenic_region	LOC102900227-LOC123384099		-1	n.167243881G>A
chrA2	167273436	C	CCCGGGG	PASS	downstream_gene_variant	MODIFIER	LOC109497720	LOC109497720	transcript	XR_002154124.2	pseudogene	-1	n.*4618_*4619insCCCCGG
chrA2	167284021	G	A	PASS	upstream_gene_variant	MODIFIER	LOC109497720	LOC109497720	transcript	XR_006594711.1	pseudogene	-1	n.-1556C>T
chrA2	167372601	C	T	PASS	intergenic_region	MODIFIER	LOC123381332-RNF32	LOC123381332-RNF32	intergenic_region	LOC123381332-RNF32		-1	n.167372601C>T
chrA2	167442676	AGC	A	PASS	3_prime_UTR_variant	MODIFIER	LMBR1	LMBR1	transcript	XM_023250806.2	protein_coding	17	c.*12_*13delGC
chrA2	167460723	G	A	PASS	intron_variant	MODIFIER	LMBR1	LMBR1	transcript	XM_023250806.2	protein_coding	15	c.1225+5569C>T
chrA2	167489382	T	A	PASS	downstream_gene_variant	MODIFIER	TRNAW-CCA	TRNAW-CCA	transcript	unassigned_transcript_87	protein_coding	-1	c.*224T>A
chrA2	167662187	G	T	PASS	intron_variant	MODIFIER	MNX1	MNX1	transcript	XM_023250815.2	protein_coding	1	c.725-1361C>A
chrA2	167911610	T	C	PASS	intron_variant	MODIFIER	DNAJB6	DNAJB6	transcript	XM_045053078.1	protein_coding	1	c.-27+1207T>C
chrA2	167914546	G	A	PASS	intron_variant	MODIFIER	DNAJB6	DNAJB6	transcript	XM_045053078.1	protein_coding	1	c.-27+4143G>A
chrA2	167914846	A	G	PASS	intron_variant	MODIFIER	DNAJB6	DNAJB6	transcript	XM_045053078.1	protein_coding	1	c.-27+4443A>G
chrA2	167918982	T	G	PASS	intron_variant	MODIFIER	DNAJB6	DNAJB6	transcript	XM_045053078.1	protein_coding	1	c.-27+8579T>G
chrA2	167921497	C	T	PASS	intron_variant	MODIFIER	DNAJB6	DNAJB6	transcript	XM_045053078.1	protein_coding	1	c.-27+11094C>T
chrA2	167928495	G	A	PASS	intron_variant	MODIFIER	DNAJB6	DNAJB6	transcript	XM_045053078.1	protein_coding	1	c.-26-6047G>A
chrA2	167929396	A	T	PASS	upstream_gene_variant	MODIFIER	DNAJB6	DNAJB6	transcript	XM_045053080.1	protein_coding	-1	c.-5075A>T
chrA2	167939603	C	T	PASS	intron_variant	MODIFIER	DNAJB6	DNAJB6	transcript	XM_045053078.1	protein_coding	4	c.236-210C>T
chrA2	167942331	G	A	PASS	intron_variant	MODIFIER	DNAJB6	DNAJB6	transcript	XM_045053078.1	protein_coding	5	c.347-296G>A
chrA2	167942903	G	A	PASS	intron_variant	MODIFIER	DNAJB6	DNAJB6	transcript	XM_045053078.1	protein_coding	6	c.451+172G>A
chrA2	167943532	C	T	PASS	intron_variant	MODIFIER	DNAJB6	DNAJB6	transcript	XM_045053078.1	protein_coding	6	c.451+801C>T
chrA2	167945953	T	C	PASS	downstream_gene_variant	MODIFIER	DNAJB6	DNAJB6	transcript	XM_045053085.1	protein_coding	-1	c.*1880T>C
chrA2	167946270	G	A	PASS	downstream_gene_variant	MODIFIER	DNAJB6	DNAJB6	transcript	XM_045053085.1	protein_coding	-1	c.*2197G>A
chrA2	167946854	G	A	PASS	downstream_gene_variant	MODIFIER	DNAJB6	DNAJB6	transcript	XM_045053085.1	protein_coding	-1	c.*2781G>A
chrA2	167946998	A	G	PASS	downstream_gene_variant	MODIFIER	DNAJB6	DNAJB6	transcript	XM_045053085.1	protein_coding	-1	c.*2925A>G
chrA2	167948625	A	G	PASS	downstream_gene_variant	MODIFIER	DNAJB6	DNAJB6	transcript	XM_045053085.1	protein_coding	-1	c.*4552A>G
chrA2	167948853	C	T	PASS	downstream_gene_variant	MODIFIER	DNAJB6	DNAJB6	transcript	XM_045053085.1	protein_coding	-1	c.*4780C>T
chrA2	167948919	C	T	PASS	downstream_gene_variant	MODIFIER	DNAJB6	DNAJB6	transcript	XM_045053085.1	protein_coding	-1	c.*4846C>T
chrA2	167949637	C	T	PASS	intron_variant	MODIFIER	DNAJB6	DNAJB6	transcript	XM_045053078.1	protein_coding	6	c.452-2803C>T
chrA2	167950965	C	T	PASS	intron_variant	MODIFIER	DNAJB6	DNAJB6	transcript	XM_045053078.1	protein_coding	6	c.452-1475C>T
chrA2	167950968	G	A	PASS	intron_variant	MODIFIER	DNAJB6	DNAJB6	transcript	XM_045053078.1	protein_coding	6	c.452-1472G>A
chrA2	167951813	G	A	PASS	intron_variant	MODIFIER	DNAJB6	DNAJB6	transcript	XM_045053078.1	protein_coding	6	c.452-627G>A
chrA2	167952059	C	T	PASS	intron_variant	MODIFIER	DNAJB6	DNAJB6	transcript	XM_045053078.1	protein_coding	6	c.452-381C>T
chrA2	167953296	G	C	PASS	intron_variant	MODIFIER	DNAJB6	DNAJB6	transcript	XM_045053078.1	protein_coding	7	c.583+725G>C
chrA2	167953603	C	T	PASS	intron_variant	MODIFIER	DNAJB6	DNAJB6	transcript	XM_045053078.1	protein_coding	7	c.583+1032C>T
chrA2	167953768	C	T	PASS	intron_variant	MODIFIER	DNAJB6	DNAJB6	transcript	XM_045053078.1	protein_coding	7	c.584-936C>T
chrA2	167955090	T	G	PASS	intron_variant	MODIFIER	DNAJB6	DNAJB6	transcript	XM_045053078.1	protein_coding	8	c.725+245T>G
chrA2	167956687	T	C	PASS	downstream_gene_variant	MODIFIER	DNAJB6	DNAJB6	transcript	XM_045053084.1	protein_coding	-1	c.*838T>C
chrA2	167958023	C	T	PASS	downstream_gene_variant	MODIFIER	DNAJB6	DNAJB6	transcript	XM_045053084.1	protein_coding	-1	c.*2174C>T
chrA2	167958623	A	G	PASS	downstream_gene_variant	MODIFIER	DNAJB6	DNAJB6	transcript	XM_045053084.1	protein_coding	-1	c.*2774A>G
chrA2	167959608	G	T	PASS	downstream_gene_variant	MODIFIER	DNAJB6	DNAJB6	transcript	XM_045053084.1	protein_coding	-1	c.*3759G>T
chrA2	167959629	G	GTGA	PASS	downstream_gene_variant	MODIFIER	DNAJB6	DNAJB6	transcript	XM_045053084.1	protein_coding	-1	c.*3780_*3781insTGA
chrA2	167959981	T	G	PASS	downstream_gene_variant	MODIFIER	DNAJB6	DNAJB6	transcript	XM_045053084.1	protein_coding	-1	c.*4132T>G
chrA2	167960661	G	GT	PASS	downstream_gene_variant	MODIFIER	DNAJB6	DNAJB6	transcript	XM_045053084.1	protein_coding	-1	c.*4812_*4813insT
chrA2	167961138	C	A	PASS	downstream_gene_variant	MODIFIER	DNAJB6	DNAJB6	transcript	XM_045053084.1	protein_coding	-1	c.*5289C>A
chrA2	167962387	A	G	PASS	intron_variant	MODIFIER	DNAJB6	DNAJB6	transcript	XM_045053078.1	protein_coding	9	c.796+6947A>G
chrA2	167963318	G	A	PASS	intron_variant	MODIFIER	DNAJB6	DNAJB6	transcript	XM_045053078.1	protein_coding	9	c.797-7876G>A
chrA2	167963598	T	TG	PASS	intron_variant	MODIFIER	DNAJB6	DNAJB6	transcript	XM_045053078.1	protein_coding	9	c.797-7596_797-7595insG
chrA2	167964542	C	T	PASS	intron_variant	MODIFIER	DNAJB6	DNAJB6	transcript	XM_045053078.1	protein_coding	9	c.797-6652C>T
chrA2	167964553	C	T	PASS	intron_variant	MODIFIER	DNAJB6	DNAJB6	transcript	XM_045053078.1	protein_coding	9	c.797-6641C>T
chrA2	167964654	G	A	PASS	intron_variant	MODIFIER	DNAJB6	DNAJB6	transcript	XM_045053078.1	protein_coding	9	c.797-6540G>A
chrA2	167964868	C	T	PASS	intron_variant	MODIFIER	DNAJB6	DNAJB6	transcript	XM_045053078.1	protein_coding	9	c.797-6326C>T
chrA2	167965138	C	T	PASS	intron_variant	MODIFIER	DNAJB6	DNAJB6	transcript	XM_045053078.1	protein_coding	9	c.797-6056C>T
chrA2	167965483	G	A	PASS	intron_variant	MODIFIER	DNAJB6	DNAJB6	transcript	XM_045053078.1	protein_coding	9	c.797-5711G>A
chrA2	167965627	G	C	PASS	intron_variant	MODIFIER	DNAJB6	DNAJB6	transcript	XM_045053078.1	protein_coding	9	c.797-5567G>C
chrA2	167966642	A	G	PASS	intron_variant	MODIFIER	DNAJB6	DNAJB6	transcript	XM_045053078.1	protein_coding	9	c.797-4552A>G
chrA2	167967360	C	T	PASS	intron_variant	MODIFIER	DNAJB6	DNAJB6	transcript	XM_045053078.1	protein_coding	9	c.797-3834C>T
chrA2	167968801	G	A	PASS	intron_variant	MODIFIER	DNAJB6	DNAJB6	transcript	XM_045053078.1	protein_coding	9	c.797-2393G>A
chrA2	167969390	C	T	PASS	intron_variant	MODIFIER	DNAJB6	DNAJB6	transcript	XM_045053078.1	protein_coding	9	c.797-1804C>T
chrA2	167971277	G	A	PASS	missense_variant	MODERATE	DNAJB6	DNAJB6	transcript	XM_045053078.1	protein_coding	10	c.880G>A	p.Gly294Ser
chrA2	167973028	C	T	PASS	intron_variant	MODIFIER	DNAJB6	DNAJB6	transcript	XM_045053078.1	protein_coding	10	c.1012+1619C>T
chrA2	169062797	G	A	PASS	intron_variant	MODIFIER	DYNC2I1	DYNC2I1	transcript	XM_003983271.6	protein_coding	11	c.1478+2334G>A
chrA2	169062829	C	G	PASS	intron_variant	MODIFIER	DYNC2I1	DYNC2I1	transcript	XM_003983271.6	protein_coding	11	c.1478+2366C>G
chrA2	169064003	G	A	PASS	intron_variant	MODIFIER	DYNC2I1	DYNC2I1	transcript	XM_003983271.6	protein_coding	11	c.1478+3540G>A
chrA2	169064012	G	A	PASS	intron_variant	MODIFIER	DYNC2I1	DYNC2I1	transcript	XM_003983271.6	protein_coding	11	c.1478+3549G>A
chrA2	169064022	T	TC	PASS	intron_variant	MODIFIER	DYNC2I1	DYNC2I1	transcript	XM_003983271.6	protein_coding	11	c.1478+3559_1478+3560insC
chrA2	169064031	G	A	PASS	intron_variant	MODIFIER	DYNC2I1	DYNC2I1	transcript	XM_003983271.6	protein_coding	11	c.1478+3568G>A
NW_025408498.1	384764	T	C	PASS	upstream_gene_variant	MODIFIER	LOC123383558	LOC123383558	transcript	XM_045051452.1	protein_coding	-1	c.-3224T>C
NW_025408499.1	58595	T	G	PASS	intergenic_region	MODIFIER	CHR_START-LOC123383568	CHR_START-LOC123383568	intergenic_region	CHR_START-LOC123383568		-1	n.58595T>G
NW_025408499.1	58596	G	T	PASS	intergenic_region	MODIFIER	CHR_START-LOC123383568	CHR_START-LOC123383568	intergenic_region	CHR_START-LOC123383568		-1	n.58596G>T
NW_025408499.1	120050	C	A	PASS	upstream_gene_variant	MODIFIER	LOC123383564	LOC123383564	transcript	XM_045051457.1	protein_coding	-1	c.-4380C>A
NW_025408499.1	236206	A	C	PASS	intergenic_region	MODIFIER	LOC123383567-CHR_END	LOC123383567-CHR_END	intergenic_region	LOC123383567-CHR_END		-1	n.236206A>C
NW_025408501.1	15712	A	G	PASS	downstream_gene_variant	MODIFIER	LOC123383574	LOC123383574	transcript	XR_006593417.1	pseudogene	-1	n.*1852T>C
NW_025408501.1	146239	T	TGGG	PASS	downstream_gene_variant	MODIFIER	LOC123383575	LOC123383575	transcript	XR_006593419.1	pseudogene	-1	n.*2450_*2451insGGG
NW_025408501.1	146244	TTTG	T	PASS	downstream_gene_variant	MODIFIER	LOC123383575	LOC123383575	transcript	XR_006593419.1	pseudogene	-1	n.*2456_*2458delTTG
NW_025408501.1	146256	TG	T	PASS	downstream_gene_variant	MODIFIER	LOC123383575	LOC123383575	transcript	XR_006593419.1	pseudogene	-1	n.*2468delG
NW_025408501.1	146261	TG	T	PASS	downstream_gene_variant	MODIFIER	LOC123383575	LOC123383575	transcript	XR_006593419.1	pseudogene	-1	n.*2473delG
NW_025408501.1	146266	T	G	PASS	downstream_gene_variant	MODIFIER	LOC123383575	LOC123383575	transcript	XR_006593419.1	pseudogene	-1	n.*2477T>G
NW_025408501.1	146307	A	T	PASS	downstream_gene_variant	MODIFIER	LOC123383575	LOC123383575	transcript	XR_006593419.1	pseudogene	-1	n.*2518A>T
NW_025408502.1	72156	G	T	PASS	downstream_gene_variant	MODIFIER	LOC123383576	LOC123383576	transcript	XR_006593421.1	pseudogene	-1	n.*3815C>A
NW_025408503.1	70677	A	AAAAG	PASS	intron_variant	MODIFIER	LOC123383578	LOC123383578	transcript	XR_006593422.1	pseudogene	1	n.134+8051_134+8052insCTTT
chrA3	401651	C	A	PASS	intron_variant	MODIFIER	PRPF6	PRPF6	transcript	XM_023250933.2	protein_coding	6	c.772-3807G>T
chrA3	553895	G	A	PASS	intron_variant	MODIFIER	ZBTB46	ZBTB46	transcript	XM_006929577.5	protein_coding	1	c.-33+2966G>A
chrA3	2374523	T	C	PASS	intron_variant	MODIFIER	CDH4	CDH4	transcript	XM_023251048.2	protein_coding	2	c.169+119522A>G
chrA3	2949741	G	C	PASS	intergenic_region	MODIFIER	LOC109498505-LOC123384245	LOC109498505-LOC123384245	intergenic_region	LOC109498505-LOC123384245		-1	n.2949741G>C
chrA3	2981015	C	T	PASS	intergenic_region	MODIFIER	LOC109498505-LOC123384245	LOC109498505-LOC123384245	intergenic_region	LOC109498505-LOC123384245		-1	n.2981015C>T
chrA3	2983550	A	G	PASS	intergenic_region	MODIFIER	LOC109498505-LOC123384245	LOC109498505-LOC123384245	intergenic_region	LOC109498505-LOC123384245		-1	n.2983550A>G
chrA3	2983783	G	A	PASS	intergenic_region	MODIFIER	LOC109498505-LOC123384245	LOC109498505-LOC123384245	intergenic_region	LOC109498505-LOC123384245		-1	n.2983783G>A
chrA3	2996997	C	CG	PASS	intergenic_region	MODIFIER	LOC109498505-LOC123384245	LOC109498505-LOC123384245	intergenic_region	LOC109498505-LOC123384245		-1	n.2996997_2996998insG
chrA3	2997001	T	G	PASS	intergenic_region	MODIFIER	LOC109498505-LOC123384245	LOC109498505-LOC123384245	intergenic_region	LOC109498505-LOC123384245		-1	n.2997001T>G
chrA3	2997391	G	A	PASS	intergenic_region	MODIFIER	LOC109498505-LOC123384245	LOC109498505-LOC123384245	intergenic_region	LOC109498505-LOC123384245		-1	n.2997391G>A
chrA3	3001047	C	T	PASS	intergenic_region	MODIFIER	LOC109498505-LOC123384245	LOC109498505-LOC123384245	intergenic_region	LOC109498505-LOC123384245		-1	n.3001047C>T
chrA3	3006235	G	A	PASS	intergenic_region	MODIFIER	LOC109498505-LOC123384245	LOC109498505-LOC123384245	intergenic_region	LOC109498505-LOC123384245		-1	n.3006235G>A
chrA3	3011053	T	G	PASS	intergenic_region	MODIFIER	LOC109498505-LOC123384245	LOC109498505-LOC123384245	intergenic_region	LOC109498505-LOC123384245		-1	n.3011053T>G
chrA3	3011349	G	T	PASS	intergenic_region	MODIFIER	LOC109498505-LOC123384245	LOC109498505-LOC123384245	intergenic_region	LOC109498505-LOC123384245		-1	n.3011349G>T
chrA3	3517596	C	T	PASS	intron_variant	MODIFIER	CDH26	CDH26	transcript	XM_006929597.4	protein_coding	1	c.66+2477G>A
chrA3	3536265	A	C	PASS	upstream_gene_variant	MODIFIER	PPP1R3D	PPP1R3D	transcript	XM_003983339.5	protein_coding	-1	c.-1321A>C
chrA3	3674302	C	T	PASS	intron_variant	MODIFIER	PHACTR3	PHACTR3	transcript	XM_045053423.1	protein_coding	7	c.1178-42G>A
chrA3	3937190	A	C	PASS	intergenic_region	MODIFIER	LOC109497883-LOC123384198	LOC109497883-LOC123384198	intergenic_region	LOC109497883-LOC123384198		-1	n.3937190A>C
chrA3	4083179	C	G	PASS	intergenic_region	MODIFIER	EDN3-ZNF831	EDN3-ZNF831	intergenic_region	EDN3-ZNF831		-1	n.4083179C>G
chrA3	4274546	G	A	PASS	intergenic_region	MODIFIER	ZNF831-PRELID3B	ZNF831-PRELID3B	intergenic_region	ZNF831-PRELID3B		-1	n.4274546G>A
chrA3	4276069	C	T	PASS	intergenic_region	MODIFIER	ZNF831-PRELID3B	ZNF831-PRELID3B	intergenic_region	ZNF831-PRELID3B		-1	n.4276069C>T
chrA3	4632831	G	A	PASS	intron_variant	MODIFIER	NPEPL1	NPEPL1	transcript	XM_023251064.2	protein_coding	3	c.507+179C>T
chrA3	4632832	C	G	PASS	intron_variant	MODIFIER	NPEPL1	NPEPL1	transcript	XM_023251064.2	protein_coding	3	c.507+178G>C
chrA3	4639935	C	T	PASS	upstream_gene_variant	MODIFIER	NPEPL1	NPEPL1	transcript	XM_045053442.1	protein_coding	-1	c.-3928G>A
chrA3	4640487	C	T	PASS	upstream_gene_variant	MODIFIER	NPEPL1	NPEPL1	transcript	XM_045053442.1	protein_coding	-1	c.-4480G>A
chrA3	5479992	C	T	PASS	intron_variant	MODIFIER	PMEPA1	PMEPA1	transcript	XM_023251074.2	protein_coding	1	c.109+17418C>T
chrA3	5685037	C	T	PASS	intergenic_region	MODIFIER	LOC123384257-RBM38	LOC123384257-RBM38	intergenic_region	LOC123384257-RBM38		-1	n.5685037C>T
chrA3	5715248	G	A	PASS	intron_variant	MODIFIER	RBM38	RBM38	transcript	XM_006929636.3	protein_coding	3	c.417-5712C>T
chrA3	5900202	G	A	PASS	intron_variant	MODIFIER	BMP7	BMP7	transcript	XM_011280760.4	protein_coding	3	c.761-2728G>A
chrA3	5922169	C	A	PASS	downstream_gene_variant	MODIFIER	BMP7	BMP7	transcript	XM_011280760.4	protein_coding	-1	c.*4344C>A
chrA3	5982831	C	T	PASS	intron_variant	MODIFIER	BMP7	BMP7	transcript	XM_045053459.1	protein_coding	6	c.1147-10532C>T
chrA3	6003399	CAGGG	C	PASS	intergenic_region	MODIFIER	BMP7-LOC109498542	BMP7-LOC109498542	intergenic_region	BMP7-LOC109498542		-1	n.6003400_6003403delAGGG
chrA3	6005591	C	T	PASS	intergenic_region	MODIFIER	BMP7-LOC109498542	BMP7-LOC109498542	intergenic_region	BMP7-LOC109498542		-1	n.6005591C>T
chrA3	6006346	C	T	PASS	intergenic_region	MODIFIER	BMP7-LOC109498542	BMP7-LOC109498542	intergenic_region	BMP7-LOC109498542		-1	n.6006346C>T
chrA3	6006602	G	T	PASS	intergenic_region	MODIFIER	BMP7-LOC109498542	BMP7-LOC109498542	intergenic_region	BMP7-LOC109498542		-1	n.6006602G>T
chrA3	6006917	C	T	PASS	intergenic_region	MODIFIER	BMP7-LOC109498542	BMP7-LOC109498542	intergenic_region	BMP7-LOC109498542		-1	n.6006917C>T
chrA3	6007606	G	A	PASS	intergenic_region	MODIFIER	BMP7-LOC109498542	BMP7-LOC109498542	intergenic_region	BMP7-LOC109498542		-1	n.6007606G>A
chrA3	6007946	T	C	PASS	intergenic_region	MODIFIER	BMP7-LOC109498542	BMP7-LOC109498542	intergenic_region	BMP7-LOC109498542		-1	n.6007946T>C
chrA3	6008993	CAG	C	PASS	intergenic_region	MODIFIER	BMP7-LOC109498542	BMP7-LOC109498542	intergenic_region	BMP7-LOC109498542		-1	n.6008994_6008995delAG
chrA3	6009292	T	C	PASS	intergenic_region	MODIFIER	BMP7-LOC109498542	BMP7-LOC109498542	intergenic_region	BMP7-LOC109498542		-1	n.6009292T>C
chrA3	6009407	C	T	PASS	intergenic_region	MODIFIER	BMP7-LOC109498542	BMP7-LOC109498542	intergenic_region	BMP7-LOC109498542		-1	n.6009407C>T
chrA3	6009844	C	T	PASS	intergenic_region	MODIFIER	BMP7-LOC109498542	BMP7-LOC109498542	intergenic_region	BMP7-LOC109498542		-1	n.6009844C>T
chrA3	6010878	G	A	PASS	intergenic_region	MODIFIER	BMP7-LOC109498542	BMP7-LOC109498542	intergenic_region	BMP7-LOC109498542		-1	n.6010878G>A
chrA3	6011303	G	A	PASS	intergenic_region	MODIFIER	BMP7-LOC109498542	BMP7-LOC109498542	intergenic_region	BMP7-LOC109498542		-1	n.6011303G>A
chrA3	6011314	C	CG	PASS	intergenic_region	MODIFIER	BMP7-LOC109498542	BMP7-LOC109498542	intergenic_region	BMP7-LOC109498542		-1	n.6011314_6011315insG
chrA3	6011824	AG	A	PASS	intergenic_region	MODIFIER	BMP7-LOC109498542	BMP7-LOC109498542	intergenic_region	BMP7-LOC109498542		-1	n.6011825delG
chrA3	6013996	C	T	PASS	intergenic_region	MODIFIER	BMP7-LOC109498542	BMP7-LOC109498542	intergenic_region	BMP7-LOC109498542		-1	n.6013996C>T
chrA3	6016197	G	C	PASS	intergenic_region	MODIFIER	BMP7-LOC109498542	BMP7-LOC109498542	intergenic_region	BMP7-LOC109498542		-1	n.6016197G>C
chrA3	6016296	AAAT	A	PASS	intergenic_region	MODIFIER	BMP7-LOC109498542	BMP7-LOC109498542	intergenic_region	BMP7-LOC109498542		-1	n.6016297_6016299delAAT
chrA3	6016587	A	G	PASS	intergenic_region	MODIFIER	BMP7-LOC109498542	BMP7-LOC109498542	intergenic_region	BMP7-LOC109498542		-1	n.6016587A>G
chrA3	6016858	T	C	PASS	intergenic_region	MODIFIER	BMP7-LOC109498542	BMP7-LOC109498542	intergenic_region	BMP7-LOC109498542		-1	n.6016858T>C
chrA3	6017358	G	A	PASS	intergenic_region	MODIFIER	BMP7-LOC109498542	BMP7-LOC109498542	intergenic_region	BMP7-LOC109498542		-1	n.6017358G>A
chrA3	6017926	G	A	PASS	intergenic_region	MODIFIER	BMP7-LOC109498542	BMP7-LOC109498542	intergenic_region	BMP7-LOC109498542		-1	n.6017926G>A
chrA3	6018123	C	T	PASS	intergenic_region	MODIFIER	BMP7-LOC109498542	BMP7-LOC109498542	intergenic_region	BMP7-LOC109498542		-1	n.6018123C>T
chrA3	6018539	C	T	PASS	intergenic_region	MODIFIER	BMP7-LOC109498542	BMP7-LOC109498542	intergenic_region	BMP7-LOC109498542		-1	n.6018539C>T
chrA3	6018731	C	T	PASS	intergenic_region	MODIFIER	BMP7-LOC109498542	BMP7-LOC109498542	intergenic_region	BMP7-LOC109498542		-1	n.6018731C>T
chrA3	6018765	G	A	PASS	intergenic_region	MODIFIER	BMP7-LOC109498542	BMP7-LOC109498542	intergenic_region	BMP7-LOC109498542		-1	n.6018765G>A
chrA3	6018922	G	A	PASS	intergenic_region	MODIFIER	BMP7-LOC109498542	BMP7-LOC109498542	intergenic_region	BMP7-LOC109498542		-1	n.6018922G>A
chrA3	6019181	T	TCA	PASS	intergenic_region	MODIFIER	BMP7-LOC109498542	BMP7-LOC109498542	intergenic_region	BMP7-LOC109498542		-1	n.6019181_6019182insCA
chrA3	6019492	G	A	PASS	intergenic_region	MODIFIER	BMP7-LOC109498542	BMP7-LOC109498542	intergenic_region	BMP7-LOC109498542		-1	n.6019492G>A
chrA3	6019583	C	T	PASS	intergenic_region	MODIFIER	BMP7-LOC109498542	BMP7-LOC109498542	intergenic_region	BMP7-LOC109498542		-1	n.6019583C>T
chrA3	6019607	T	C	PASS	intergenic_region	MODIFIER	BMP7-LOC109498542	BMP7-LOC109498542	intergenic_region	BMP7-LOC109498542		-1	n.6019607T>C
chrA3	6019714	CA	C	PASS	intergenic_region	MODIFIER	BMP7-LOC109498542	BMP7-LOC109498542	intergenic_region	BMP7-LOC109498542		-1	n.6019715delA
chrA3	6019773	A	C	PASS	intergenic_region	MODIFIER	BMP7-LOC109498542	BMP7-LOC109498542	intergenic_region	BMP7-LOC109498542		-1	n.6019773A>C
chrA3	6022448	G	A	PASS	intergenic_region	MODIFIER	BMP7-LOC109498542	BMP7-LOC109498542	intergenic_region	BMP7-LOC109498542		-1	n.6022448G>A
chrA3	6022942	C	T	PASS	intergenic_region	MODIFIER	BMP7-LOC109498542	BMP7-LOC109498542	intergenic_region	BMP7-LOC109498542		-1	n.6022942C>T
chrA3	6025444	C	A	PASS	intergenic_region	MODIFIER	BMP7-LOC109498542	BMP7-LOC109498542	intergenic_region	BMP7-LOC109498542		-1	n.6025444C>A
chrA3	6026240	AG	A	PASS	intergenic_region	MODIFIER	BMP7-LOC109498542	BMP7-LOC109498542	intergenic_region	BMP7-LOC109498542		-1	n.6026241delG
chrA3	6028110	C	T	PASS	intergenic_region	MODIFIER	BMP7-LOC109498542	BMP7-LOC109498542	intergenic_region	BMP7-LOC109498542		-1	n.6028110C>T
chrA3	6028139	A	T	PASS	intergenic_region	MODIFIER	BMP7-LOC109498542	BMP7-LOC109498542	intergenic_region	BMP7-LOC109498542		-1	n.6028139A>T
chrA3	6028678	G	A	PASS	intergenic_region	MODIFIER	BMP7-LOC109498542	BMP7-LOC109498542	intergenic_region	BMP7-LOC109498542		-1	n.6028678G>A
chrA3	6028781	C	T	PASS	intergenic_region	MODIFIER	BMP7-LOC109498542	BMP7-LOC109498542	intergenic_region	BMP7-LOC109498542		-1	n.6028781C>T
chrA3	6070554	G	A	PASS	intergenic_region	MODIFIER	LOC109498542-LOC123384200	LOC109498542-LOC123384200	intergenic_region	LOC109498542-LOC123384200		-1	n.6070554G>A
chrA3	6134976	C	T	PASS	intergenic_region	MODIFIER	LOC123384200-TFAP2C	LOC123384200-TFAP2C	intergenic_region	LOC123384200-TFAP2C		-1	n.6134976C>T
chrA3	6137896	T	A	PASS	intergenic_region	MODIFIER	LOC123384200-TFAP2C	LOC123384200-TFAP2C	intergenic_region	LOC123384200-TFAP2C		-1	n.6137896T>A
chrA3	6138305	C	T	PASS	intergenic_region	MODIFIER	LOC123384200-TFAP2C	LOC123384200-TFAP2C	intergenic_region	LOC123384200-TFAP2C		-1	n.6138305C>T
chrA3	6139272	G	A	PASS	intergenic_region	MODIFIER	LOC123384200-TFAP2C	LOC123384200-TFAP2C	intergenic_region	LOC123384200-TFAP2C		-1	n.6139272G>A
chrA3	6140493	G	A	PASS	intergenic_region	MODIFIER	LOC123384200-TFAP2C	LOC123384200-TFAP2C	intergenic_region	LOC123384200-TFAP2C		-1	n.6140493G>A
chrA3	6141204	C	T	PASS	intergenic_region	MODIFIER	LOC123384200-TFAP2C	LOC123384200-TFAP2C	intergenic_region	LOC123384200-TFAP2C		-1	n.6141204C>T
chrA3	6142982	G	GT	PASS	intergenic_region	MODIFIER	LOC123384200-TFAP2C	LOC123384200-TFAP2C	intergenic_region	LOC123384200-TFAP2C		-1	n.6142982_6142983insT
chrA3	6144036	G	A	PASS	intergenic_region	MODIFIER	LOC123384200-TFAP2C	LOC123384200-TFAP2C	intergenic_region	LOC123384200-TFAP2C		-1	n.6144036G>A
chrA3	6144383	GTCTGGC	G	PASS	intergenic_region	MODIFIER	LOC123384200-TFAP2C	LOC123384200-TFAP2C	intergenic_region	LOC123384200-TFAP2C		-1	n.6144384_6144389delTCTGGC
chrA3	6144527	G	A	PASS	intergenic_region	MODIFIER	LOC123384200-TFAP2C	LOC123384200-TFAP2C	intergenic_region	LOC123384200-TFAP2C		-1	n.6144527G>A
chrA3	6146818	G	A	PASS	intergenic_region	MODIFIER	LOC123384200-TFAP2C	LOC123384200-TFAP2C	intergenic_region	LOC123384200-TFAP2C		-1	n.6146818G>A
chrA3	6147109	C	T	PASS	intergenic_region	MODIFIER	LOC123384200-TFAP2C	LOC123384200-TFAP2C	intergenic_region	LOC123384200-TFAP2C		-1	n.6147109C>T
chrA3	6147653	G	A	PASS	intergenic_region	MODIFIER	LOC123384200-TFAP2C	LOC123384200-TFAP2C	intergenic_region	LOC123384200-TFAP2C		-1	n.6147653G>A
chrA3	6150626	A	T	PASS	intergenic_region	MODIFIER	LOC123384200-TFAP2C	LOC123384200-TFAP2C	intergenic_region	LOC123384200-TFAP2C		-1	n.6150626A>T
chrA3	6151300	GC	G	PASS	intergenic_region	MODIFIER	LOC123384200-TFAP2C	LOC123384200-TFAP2C	intergenic_region	LOC123384200-TFAP2C		-1	n.6151301delC
chrA3	6152041	A	G	PASS	intergenic_region	MODIFIER	LOC123384200-TFAP2C	LOC123384200-TFAP2C	intergenic_region	LOC123384200-TFAP2C		-1	n.6152041A>G
chrA3	6157157	G	A	PASS	intergenic_region	MODIFIER	LOC123384200-TFAP2C	LOC123384200-TFAP2C	intergenic_region	LOC123384200-TFAP2C		-1	n.6157157G>A
chrA3	6175915	A	C	PASS	intergenic_region	MODIFIER	LOC123384200-TFAP2C	LOC123384200-TFAP2C	intergenic_region	LOC123384200-TFAP2C		-1	n.6175915A>C
chrA3	6175981	A	AAT	PASS	intergenic_region	MODIFIER	LOC123384200-TFAP2C	LOC123384200-TFAP2C	intergenic_region	LOC123384200-TFAP2C		-1	n.6175981_6175982insAT
chrA3	6176614	G	A	PASS	intergenic_region	MODIFIER	LOC123384200-TFAP2C	LOC123384200-TFAP2C	intergenic_region	LOC123384200-TFAP2C		-1	n.6176614G>A
chrA3	6176746	T	C	PASS	intergenic_region	MODIFIER	LOC123384200-TFAP2C	LOC123384200-TFAP2C	intergenic_region	LOC123384200-TFAP2C		-1	n.6176746T>C
chrA3	6176760	T	C	PASS	intergenic_region	MODIFIER	LOC123384200-TFAP2C	LOC123384200-TFAP2C	intergenic_region	LOC123384200-TFAP2C		-1	n.6176760T>C
chrA3	6176761	G	A	PASS	intergenic_region	MODIFIER	LOC123384200-TFAP2C	LOC123384200-TFAP2C	intergenic_region	LOC123384200-TFAP2C		-1	n.6176761G>A
chrA3	6177394	G	A	PASS	intergenic_region	MODIFIER	LOC123384200-TFAP2C	LOC123384200-TFAP2C	intergenic_region	LOC123384200-TFAP2C		-1	n.6177394G>A
chrA3	6178696	G	A	PASS	intergenic_region	MODIFIER	LOC123384200-TFAP2C	LOC123384200-TFAP2C	intergenic_region	LOC123384200-TFAP2C		-1	n.6178696G>A
chrA3	6179093	C	T	PASS	intergenic_region	MODIFIER	LOC123384200-TFAP2C	LOC123384200-TFAP2C	intergenic_region	LOC123384200-TFAP2C		-1	n.6179093C>T
chrA3	6179420	G	A	PASS	intergenic_region	MODIFIER	LOC123384200-TFAP2C	LOC123384200-TFAP2C	intergenic_region	LOC123384200-TFAP2C		-1	n.6179420G>A
chrA3	6181146	A	AAAAC	PASS	intergenic_region	MODIFIER	LOC123384200-TFAP2C	LOC123384200-TFAP2C	intergenic_region	LOC123384200-TFAP2C		-1	n.6181146_6181147insAAAC
chrA3	6181161	T	G	PASS	intergenic_region	MODIFIER	LOC123384200-TFAP2C	LOC123384200-TFAP2C	intergenic_region	LOC123384200-TFAP2C		-1	n.6181161T>G
chrA3	6182137	GGA	G	PASS	intergenic_region	MODIFIER	LOC123384200-TFAP2C	LOC123384200-TFAP2C	intergenic_region	LOC123384200-TFAP2C		-1	n.6182138_6182139delGA
chrA3	6184810	GCC	G	PASS	intergenic_region	MODIFIER	LOC123384200-TFAP2C	LOC123384200-TFAP2C	intergenic_region	LOC123384200-TFAP2C		-1	n.6184811_6184812delCC
chrA3	6184830	G	C	PASS	intergenic_region	MODIFIER	LOC123384200-TFAP2C	LOC123384200-TFAP2C	intergenic_region	LOC123384200-TFAP2C		-1	n.6184830G>C
chrA3	6184862	G	A	PASS	intergenic_region	MODIFIER	LOC123384200-TFAP2C	LOC123384200-TFAP2C	intergenic_region	LOC123384200-TFAP2C		-1	n.6184862G>A
chrA3	6185276	G	C	PASS	intergenic_region	MODIFIER	LOC123384200-TFAP2C	LOC123384200-TFAP2C	intergenic_region	LOC123384200-TFAP2C		-1	n.6185276G>C
chrA3	6185290	G	A	PASS	intergenic_region	MODIFIER	LOC123384200-TFAP2C	LOC123384200-TFAP2C	intergenic_region	LOC123384200-TFAP2C		-1	n.6185290G>A
chrA3	6185374	G	C	PASS	intergenic_region	MODIFIER	LOC123384200-TFAP2C	LOC123384200-TFAP2C	intergenic_region	LOC123384200-TFAP2C		-1	n.6185374G>C
chrA3	6185446	G	A	PASS	intergenic_region	MODIFIER	LOC123384200-TFAP2C	LOC123384200-TFAP2C	intergenic_region	LOC123384200-TFAP2C		-1	n.6185446G>A
chrA3	6196390	C	T	PASS	intergenic_region	MODIFIER	LOC123384200-TFAP2C	LOC123384200-TFAP2C	intergenic_region	LOC123384200-TFAP2C		-1	n.6196390C>T
chrA3	6205143	CGGGCGGATGGATGGATGGATGGATGGATGGTTGGAT	C	PASS	intergenic_region	MODIFIER	LOC123384200-TFAP2C	LOC123384200-TFAP2C	intergenic_region	LOC123384200-TFAP2C		-1	n.6205144_6205179delGGGCGGATGGATGGATGGATGGATGGATGGTTGGAT
chrA3	6205187	TGGACGGGC	T	PASS	intergenic_region	MODIFIER	LOC123384200-TFAP2C	LOC123384200-TFAP2C	intergenic_region	LOC123384200-TFAP2C		-1	n.6205188_6205195delGGACGGGC
chrA3	6205231	C	T	PASS	intergenic_region	MODIFIER	LOC123384200-TFAP2C	LOC123384200-TFAP2C	intergenic_region	LOC123384200-TFAP2C		-1	n.6205231C>T
chrA3	6349228	C	T	PASS	intergenic_region	MODIFIER	TFAP2C-LOC109498544	TFAP2C-LOC109498544	intergenic_region	TFAP2C-LOC109498544		-1	n.6349228C>T
chrA3	6350271	G	GT	PASS	intergenic_region	MODIFIER	TFAP2C-LOC109498544	TFAP2C-LOC109498544	intergenic_region	TFAP2C-LOC109498544		-1	n.6350271_6350272insT
chrA3	6356491	C	T	PASS	intergenic_region	MODIFIER	TFAP2C-LOC109498544	TFAP2C-LOC109498544	intergenic_region	TFAP2C-LOC109498544		-1	n.6356491C>T
chrA3	6365781	C	T	PASS	upstream_gene_variant	MODIFIER	LOC109498544	LOC109498544	transcript	XR_002155364.3	pseudogene	-1	n.-3616C>T
chrA3	6368874	T	A	PASS	upstream_gene_variant	MODIFIER	LOC109498544	LOC109498544	transcript	XR_002155364.3	pseudogene	-1	n.-523T>A
chrA3	6407805	AAT	A	PASS	upstream_gene_variant	MODIFIER	GCNT7	GCNT7	transcript	XM_045053462.1	protein_coding	-1	c.-2582_-2581delAT
chrA3	6410345	T	C	PASS	upstream_gene_variant	MODIFIER	LOC101094662	LOC101094662	transcript	XM_003983370.5	protein_coding	-1	c.-482A>G
chrA3	6413799	C	T	PASS	3_prime_UTR_variant	MODIFIER	RTF2	RTF2	transcript	XM_045053468.1	protein_coding	10	c.*148G>A
chrA3	6486640	G	GA	PASS	intron_variant	MODIFIER	CASS4	CASS4	transcript	XM_011280758.4	protein_coding	1	c.37-10334_37-10333insT
chrA3	6507712	T	TTAGAAGGTC	PASS	intron_variant	MODIFIER	CSTF1	CSTF1	transcript	XM_003983355.5	protein_coding	5	c.1037-1400_1037-1399insGACCTTCTA
chrA3	6534254	TTTG	T	PASS	intron_variant	MODIFIER	AURKA	AURKA	transcript	XM_006929641.5	protein_coding	7	c.857+552_857+554delTTG
chrA3	6544645	G	T	PASS	intron_variant	MODIFIER	FAM210B	FAM210B	transcript	XM_023251081.2	protein_coding	1	c.187-1907C>A
chrA3	6623660	G	T	PASS	upstream_gene_variant	MODIFIER	MC3R	MC3R	transcript	XM_023251083.2	protein_coding	-1	c.-231C>A
chrA3	6714810	A	G	PASS	intergenic_region	MODIFIER	LOC123384259-CBLN4	LOC123384259-CBLN4	intergenic_region	LOC123384259-CBLN4		-1	n.6714810A>G
chrA3	6860295	C	T	PASS	intron_variant	MODIFIER	CBLN4	CBLN4	transcript	XR_006595038.1	pseudogene	3	n.1485-14003C>T
chrA3	7587417	G	A	PASS	intergenic_region	MODIFIER	LOC109497912-LOC123384261	LOC109497912-LOC123384261	intergenic_region	LOC109497912-LOC123384261		-1	n.7587417G>A
chrA3	7692979	C	T	PASS	intron_variant	MODIFIER	LOC123384261	LOC123384261	transcript	XR_006595041.1	pseudogene	3	n.1038-20857G>A
chrA3	7729255	G	A	PASS	intron_variant	MODIFIER	LOC123384261	LOC123384261	transcript	XR_006595041.1	pseudogene	3	n.1037+9803C>T
chrA3	7749202	G	T	PASS	intron_variant	MODIFIER	LOC123384261	LOC123384261	transcript	XR_006595041.1	pseudogene	2	n.902+3132C>A
chrA3	7749813	G	A	PASS	intron_variant	MODIFIER	LOC123384261	LOC123384261	transcript	XR_006595041.1	pseudogene	2	n.902+2521C>T
chrA3	7749843	G	A	PASS	intron_variant	MODIFIER	LOC123384261	LOC123384261	transcript	XR_006595041.1	pseudogene	2	n.902+2491C>T
chrA3	7751092	A	AGAAG	PASS	intron_variant	MODIFIER	LOC123384261	LOC123384261	transcript	XR_006595041.1	pseudogene	2	n.902+1241_902+1242insCTTC
chrA3	7753532	CCATTT	C	PASS	intron_variant	MODIFIER	LOC123384261	LOC123384261	transcript	XR_006595041.1	pseudogene	1	n.767-1068_767-1064delAAATG
chrA3	7754133	G	A	PASS	intron_variant	MODIFIER	LOC123384261	LOC123384261	transcript	XR_006595041.1	pseudogene	1	n.767-1664C>T
chrA3	7757813	C	T	PASS	intron_variant	MODIFIER	LOC123384261	LOC123384261	transcript	XR_006595041.1	pseudogene	1	n.767-5344G>A
chrA3	7760309	T	G	PASS	intron_variant	MODIFIER	LOC123384261	LOC123384261	transcript	XR_006595041.1	pseudogene	1	n.767-7840A>C
chrA3	7760397	AT	A	PASS	intron_variant	MODIFIER	LOC123384261	LOC123384261	transcript	XR_006595041.1	pseudogene	1	n.767-7929delA
chrA3	7760910	G	A	PASS	intron_variant	MODIFIER	LOC123384261	LOC123384261	transcript	XR_006595041.1	pseudogene	1	n.767-8441C>T
chrA3	7761826	T	C	PASS	intron_variant	MODIFIER	LOC123384261	LOC123384261	transcript	XR_006595041.1	pseudogene	1	n.767-9357A>G
chrA3	7763604	T	G	PASS	intron_variant	MODIFIER	LOC123384261	LOC123384261	transcript	XR_006595041.1	pseudogene	1	n.767-11135A>C
chrA3	7770201	T	TA	PASS	intron_variant	MODIFIER	LOC123384261	LOC123384261	transcript	XR_006595041.1	pseudogene	1	n.767-17733_767-17732insT
chrA3	7775103	GTGTGTGTGAGAGAGAGAGAGAGAGAGAGAA	G	PASS	intron_variant	MODIFIER	LOC123384261	LOC123384261	transcript	XR_006595041.1	pseudogene	1	n.767-22664_767-22635delTTCTCTCTCTCTCTCTCTCTCTCACACACA
chrA3	7778100	TA	T	PASS	intron_variant	MODIFIER	LOC123384261	LOC123384261	transcript	XR_006595041.1	pseudogene	1	n.767-25632delT
chrA3	7795551	T	C	PASS	intron_variant	MODIFIER	LOC123384261	LOC123384261	transcript	XR_006595041.1	pseudogene	1	n.767-43082A>G
chrA3	7801214	G	A	PASS	intron_variant	MODIFIER	LOC123384261	LOC123384261	transcript	XR_006595041.1	pseudogene	1	n.767-48745C>T
chrA3	7801378	G	A	PASS	intron_variant	MODIFIER	LOC123384261	LOC123384261	transcript	XR_006595041.1	pseudogene	1	n.767-48909C>T
chrA3	7826165	G	A	PASS	intron_variant	MODIFIER	LOC123384261	LOC123384261	transcript	XR_006595041.1	pseudogene	1	n.767-73696C>T
chrA3	7828626	C	T	PASS	intron_variant	MODIFIER	LOC123384261	LOC123384261	transcript	XR_006595041.1	pseudogene	1	n.766+72972G>A
chrA3	7828649	A	C	PASS	intron_variant	MODIFIER	LOC123384261	LOC123384261	transcript	XR_006595041.1	pseudogene	1	n.766+72949T>G
chrA3	7828712	CTCTG	C	PASS	intron_variant	MODIFIER	LOC123384261	LOC123384261	transcript	XR_006595041.1	pseudogene	1	n.766+72882_766+72885delCAGA
chrA3	7829051	T	G	PASS	intron_variant	MODIFIER	LOC123384261	LOC123384261	transcript	XR_006595041.1	pseudogene	1	n.766+72547A>C
chrA3	7829176	A	G	PASS	intron_variant	MODIFIER	LOC123384261	LOC123384261	transcript	XR_006595041.1	pseudogene	1	n.766+72422T>C
chrA3	7829739	T	C	PASS	intron_variant	MODIFIER	LOC123384261	LOC123384261	transcript	XR_006595041.1	pseudogene	1	n.766+71859A>G
chrA3	7831652	CAT	C	PASS	intron_variant	MODIFIER	LOC123384261	LOC123384261	transcript	XR_006595041.1	pseudogene	1	n.766+69944_766+69945delAT
chrA3	7831915	G	T	PASS	intron_variant	MODIFIER	LOC123384261	LOC123384261	transcript	XR_006595041.1	pseudogene	1	n.766+69683C>A
chrA3	7832074	A	C	PASS	intron_variant	MODIFIER	LOC123384261	LOC123384261	transcript	XR_006595041.1	pseudogene	1	n.766+69524T>G
chrA3	7833008	T	C	PASS	intron_variant	MODIFIER	LOC123384261	LOC123384261	transcript	XR_006595041.1	pseudogene	1	n.766+68590A>G
chrA3	7834752	T	A	PASS	intron_variant	MODIFIER	LOC123384261	LOC123384261	transcript	XR_006595041.1	pseudogene	1	n.766+66846A>T
chrA3	7836812	T	C	PASS	intron_variant	MODIFIER	LOC123384261	LOC123384261	transcript	XR_006595041.1	pseudogene	1	n.766+64786A>G
chrA3	7837815	C	T	PASS	intron_variant	MODIFIER	LOC123384261	LOC123384261	transcript	XR_006595041.1	pseudogene	1	n.766+63783G>A
chrA3	7838072	T	TA	PASS	intron_variant	MODIFIER	LOC123384261	LOC123384261	transcript	XR_006595041.1	pseudogene	1	n.766+63525_766+63526insT
chrA3	7838231	C	T	PASS	intron_variant	MODIFIER	LOC123384261	LOC123384261	transcript	XR_006595041.1	pseudogene	1	n.766+63367G>A
chrA3	7839603	C	T	PASS	upstream_gene_variant	MODIFIER	LOC111559907	LOC111559907	transcript	XR_002741377.1	snRNA	-1	n.-3996C>T
chrA3	7843114	G	C	PASS	upstream_gene_variant	MODIFIER	LOC111559907	LOC111559907	transcript	XR_002741377.1	snRNA	-1	n.-485G>C
chrA3	7848009	G	T	PASS	upstream_gene_variant	MODIFIER	LOC123384261	LOC123384261	transcript	XR_006595042.1	pseudogene	-1	n.-2689C>A
chrA3	7848447	C	T	PASS	upstream_gene_variant	MODIFIER	LOC123384261	LOC123384261	transcript	XR_006595042.1	pseudogene	-1	n.-3127G>A
chrA3	7848519	A	G	PASS	upstream_gene_variant	MODIFIER	LOC123384261	LOC123384261	transcript	XR_006595042.1	pseudogene	-1	n.-3199T>C
chrA3	7849167	A	T	PASS	upstream_gene_variant	MODIFIER	LOC123384261	LOC123384261	transcript	XR_006595042.1	pseudogene	-1	n.-3847T>A
chrA3	7849234	C	T	PASS	upstream_gene_variant	MODIFIER	LOC123384261	LOC123384261	transcript	XR_006595042.1	pseudogene	-1	n.-3914G>A
chrA3	7849760	T	C	PASS	upstream_gene_variant	MODIFIER	LOC123384261	LOC123384261	transcript	XR_006595042.1	pseudogene	-1	n.-4440A>G
chrA3	7850544	A	G	PASS	intron_variant	MODIFIER	LOC123384261	LOC123384261	transcript	XR_006595041.1	pseudogene	1	n.766+51054T>C
chrA3	7850982	TA	T	PASS	intron_variant	MODIFIER	LOC123384261	LOC123384261	transcript	XR_006595041.1	pseudogene	1	n.766+50615delT
chrA3	7851223	TATA	T	PASS	intron_variant	MODIFIER	LOC123384261	LOC123384261	transcript	XR_006595041.1	pseudogene	1	n.766+50372_766+50374delTAT
chrA3	7851767	C	T	PASS	intron_variant	MODIFIER	LOC123384261	LOC123384261	transcript	XR_006595041.1	pseudogene	1	n.766+49831G>A
chrA3	7852093	T	C	PASS	intron_variant	MODIFIER	LOC123384261	LOC123384261	transcript	XR_006595041.1	pseudogene	1	n.766+49505A>G
chrA3	7852629	C	T	PASS	intron_variant	MODIFIER	LOC123384261	LOC123384261	transcript	XR_006595041.1	pseudogene	1	n.766+48969G>A
chrA3	7852652	A	C	PASS	intron_variant	MODIFIER	LOC123384261	LOC123384261	transcript	XR_006595041.1	pseudogene	1	n.766+48946T>G
chrA3	7852890	G	A	PASS	intron_variant	MODIFIER	LOC123384261	LOC123384261	transcript	XR_006595041.1	pseudogene	1	n.766+48708C>T
chrA3	7861751	G	A	PASS	intron_variant	MODIFIER	LOC123384261	LOC123384261	transcript	XR_006595041.1	pseudogene	1	n.766+39847C>T
chrA3	7864173	C	T	PASS	intron_variant	MODIFIER	LOC123384261	LOC123384261	transcript	XR_006595041.1	pseudogene	1	n.766+37425G>A
chrA3	7865759	G	A	PASS	intron_variant	MODIFIER	LOC123384261	LOC123384261	transcript	XR_006595041.1	pseudogene	1	n.766+35839C>T
chrA3	7865778	A	G	PASS	intron_variant	MODIFIER	LOC123384261	LOC123384261	transcript	XR_006595041.1	pseudogene	1	n.766+35820T>C
chrA3	7865857	C	A	PASS	intron_variant	MODIFIER	LOC123384261	LOC123384261	transcript	XR_006595041.1	pseudogene	1	n.766+35741G>T
chrA3	7866051	G	A	PASS	intron_variant	MODIFIER	LOC123384261	LOC123384261	transcript	XR_006595041.1	pseudogene	1	n.766+35547C>T
chrA3	7866915	A	AAAGAAGC	PASS	intron_variant	MODIFIER	LOC123384261	LOC123384261	transcript	XR_006595041.1	pseudogene	1	n.766+34682_766+34683insGCTTCTT
chrA3	7867111	T	C	PASS	intron_variant	MODIFIER	LOC123384261	LOC123384261	transcript	XR_006595041.1	pseudogene	1	n.766+34487A>G
chrA3	7867291	C	T	PASS	intron_variant	MODIFIER	LOC123384261	LOC123384261	transcript	XR_006595041.1	pseudogene	1	n.766+34307G>A
chrA3	7867544	G	A	PASS	intron_variant	MODIFIER	LOC123384261	LOC123384261	transcript	XR_006595041.1	pseudogene	1	n.766+34054C>T
chrA3	7867639	A	G	PASS	intron_variant	MODIFIER	LOC123384261	LOC123384261	transcript	XR_006595041.1	pseudogene	1	n.766+33959T>C
chrA3	7867670	C	A	PASS	intron_variant	MODIFIER	LOC123384261	LOC123384261	transcript	XR_006595041.1	pseudogene	1	n.766+33928G>T
chrA3	7867716	C	T	PASS	intron_variant	MODIFIER	LOC123384261	LOC123384261	transcript	XR_006595041.1	pseudogene	1	n.766+33882G>A
chrA3	7867985	T	A	PASS	intron_variant	MODIFIER	LOC123384261	LOC123384261	transcript	XR_006595041.1	pseudogene	1	n.766+33613A>T
chrA3	7868259	AAAGT	A	PASS	intron_variant	MODIFIER	LOC123384261	LOC123384261	transcript	XR_006595041.1	pseudogene	1	n.766+33335_766+33338delACTT
chrA3	7868283	A	G	PASS	intron_variant	MODIFIER	LOC123384261	LOC123384261	transcript	XR_006595041.1	pseudogene	1	n.766+33315T>C
chrA3	7868743	C	T	PASS	intron_variant	MODIFIER	LOC123384261	LOC123384261	transcript	XR_006595041.1	pseudogene	1	n.766+32855G>A
chrA3	7868909	C	T	PASS	intron_variant	MODIFIER	LOC123384261	LOC123384261	transcript	XR_006595041.1	pseudogene	1	n.766+32689G>A
chrA3	7868927	C	T	PASS	intron_variant	MODIFIER	LOC123384261	LOC123384261	transcript	XR_006595041.1	pseudogene	1	n.766+32671G>A
chrA3	7869009	A	G	PASS	intron_variant	MODIFIER	LOC123384261	LOC123384261	transcript	XR_006595041.1	pseudogene	1	n.766+32589T>C
chrA3	7869186	T	C	PASS	intron_variant	MODIFIER	LOC123384261	LOC123384261	transcript	XR_006595041.1	pseudogene	1	n.766+32412A>G
chrA3	7869283	A	G	PASS	intron_variant	MODIFIER	LOC123384261	LOC123384261	transcript	XR_006595041.1	pseudogene	1	n.766+32315T>C
chrA3	7869407	A	G	PASS	intron_variant	MODIFIER	LOC123384261	LOC123384261	transcript	XR_006595041.1	pseudogene	1	n.766+32191T>C
chrA3	7869469	ATTGG	A	PASS	intron_variant	MODIFIER	LOC123384261	LOC123384261	transcript	XR_006595041.1	pseudogene	1	n.766+32125_766+32128delCCAA
chrA3	7869575	A	G	PASS	intron_variant	MODIFIER	LOC123384261	LOC123384261	transcript	XR_006595041.1	pseudogene	1	n.766+32023T>C
chrA3	7869795	A	G	PASS	intron_variant	MODIFIER	LOC123384261	LOC123384261	transcript	XR_006595041.1	pseudogene	1	n.766+31803T>C
chrA3	7869824	AT	A	PASS	intron_variant	MODIFIER	LOC123384261	LOC123384261	transcript	XR_006595041.1	pseudogene	1	n.766+31773delA
chrA3	7870056	A	AT	PASS	intron_variant	MODIFIER	LOC123384261	LOC123384261	transcript	XR_006595041.1	pseudogene	1	n.766+31541_766+31542insA
chrA3	7870072	A	T	PASS	intron_variant	MODIFIER	LOC123384261	LOC123384261	transcript	XR_006595041.1	pseudogene	1	n.766+31526T>A
chrA3	7870601	C	T	PASS	intron_variant	MODIFIER	LOC123384261	LOC123384261	transcript	XR_006595041.1	pseudogene	1	n.766+30997G>A
chrA3	7870626	A	G	PASS	intron_variant	MODIFIER	LOC123384261	LOC123384261	transcript	XR_006595041.1	pseudogene	1	n.766+30972T>C
chrA3	7870929	T	G	PASS	intron_variant	MODIFIER	LOC123384261	LOC123384261	transcript	XR_006595041.1	pseudogene	1	n.766+30669A>C
chrA3	7871521	C	G	PASS	intron_variant	MODIFIER	LOC123384261	LOC123384261	transcript	XR_006595041.1	pseudogene	1	n.766+30077G>C
chrA3	7879428	C	T	PASS	intron_variant	MODIFIER	LOC123384261	LOC123384261	transcript	XR_006595041.1	pseudogene	1	n.766+22170G>A
chrA3	7881168	A	G	PASS	intron_variant	MODIFIER	LOC123384261	LOC123384261	transcript	XR_006595041.1	pseudogene	1	n.766+20430T>C
chrA3	7881865	C	T	PASS	intron_variant	MODIFIER	LOC123384261	LOC123384261	transcript	XR_006595041.1	pseudogene	1	n.766+19733G>A
chrA3	7882499	C	G	PASS	intron_variant	MODIFIER	LOC123384261	LOC123384261	transcript	XR_006595041.1	pseudogene	1	n.766+19099G>C
chrA3	7883188	C	CCT	PASS	intron_variant	MODIFIER	LOC123384261	LOC123384261	transcript	XR_006595041.1	pseudogene	1	n.766+18409_766+18410insAG
chrA3	7883733	T	C	PASS	intron_variant	MODIFIER	LOC123384261	LOC123384261	transcript	XR_006595041.1	pseudogene	1	n.766+17865A>G
chrA3	7883992	A	G	PASS	intron_variant	MODIFIER	LOC123384261	LOC123384261	transcript	XR_006595041.1	pseudogene	1	n.766+17606T>C
chrA3	7884489	C	T	PASS	intron_variant	MODIFIER	LOC123384261	LOC123384261	transcript	XR_006595041.1	pseudogene	1	n.766+17109G>A
chrA3	7885452	C	T	PASS	intron_variant	MODIFIER	LOC123384261	LOC123384261	transcript	XR_006595041.1	pseudogene	1	n.766+16146G>A
chrA3	7885464	G	A	PASS	intron_variant	MODIFIER	LOC123384261	LOC123384261	transcript	XR_006595041.1	pseudogene	1	n.766+16134C>T
chrA3	7885480	C	T	PASS	intron_variant	MODIFIER	LOC123384261	LOC123384261	transcript	XR_006595041.1	pseudogene	1	n.766+16118G>A
chrA3	7885486	A	T	PASS	intron_variant	MODIFIER	LOC123384261	LOC123384261	transcript	XR_006595041.1	pseudogene	1	n.766+16112T>A
chrA3	7885689	C	T	PASS	intron_variant	MODIFIER	LOC123384261	LOC123384261	transcript	XR_006595041.1	pseudogene	1	n.766+15909G>A
chrA3	7886152	A	G	PASS	intron_variant	MODIFIER	LOC123384261	LOC123384261	transcript	XR_006595041.1	pseudogene	1	n.766+15446T>C
chrA3	7887112	G	A	PASS	intron_variant	MODIFIER	LOC123384261	LOC123384261	transcript	XR_006595041.1	pseudogene	1	n.766+14486C>T
chrA3	7887170	CAG	C	PASS	intron_variant	MODIFIER	LOC123384261	LOC123384261	transcript	XR_006595041.1	pseudogene	1	n.766+14426_766+14427delCT
chrA3	7887245	C	T	PASS	intron_variant	MODIFIER	LOC123384261	LOC123384261	transcript	XR_006595041.1	pseudogene	1	n.766+14353G>A
chrA3	7889075	A	G	PASS	intron_variant	MODIFIER	LOC123384261	LOC123384261	transcript	XR_006595041.1	pseudogene	1	n.766+12523T>C
chrA3	7889421	G	A	PASS	intron_variant	MODIFIER	LOC123384261	LOC123384261	transcript	XR_006595041.1	pseudogene	1	n.766+12177C>T
chrA3	7890968	A	G	PASS	intron_variant	MODIFIER	LOC123384261	LOC123384261	transcript	XR_006595041.1	pseudogene	1	n.766+10630T>C
chrA3	7895484	G	A	PASS	intron_variant	MODIFIER	LOC123384261	LOC123384261	transcript	XR_006595041.1	pseudogene	1	n.766+6114C>T
chrA3	7896673	CAA	C	PASS	intron_variant	MODIFIER	LOC123384261	LOC123384261	transcript	XR_006595041.1	pseudogene	1	n.766+4923_766+4924delTT
chrA3	7896683	T	C	PASS	intron_variant	MODIFIER	LOC123384261	LOC123384261	transcript	XR_006595041.1	pseudogene	1	n.766+4915A>G
chrA3	7896957	T	C	PASS	intron_variant	MODIFIER	LOC123384261	LOC123384261	transcript	XR_006595041.1	pseudogene	1	n.766+4641A>G
chrA3	7897443	C	CCCCCCCCCG	PASS	intron_variant	MODIFIER	LOC123384261	LOC123384261	transcript	XR_006595041.1	pseudogene	1	n.766+4154_766+4155insCGGGGGGGG
chrA3	7898162	A	T	PASS	intron_variant	MODIFIER	LOC123384261	LOC123384261	transcript	XR_006595041.1	pseudogene	1	n.766+3436T>A
chrA3	7898874	G	A	PASS	intron_variant	MODIFIER	LOC123384261	LOC123384261	transcript	XR_006595041.1	pseudogene	1	n.766+2724C>T
chrA3	7899329	A	G	PASS	intron_variant	MODIFIER	LOC123384261	LOC123384261	transcript	XR_006595041.1	pseudogene	1	n.766+2269T>C
chrA3	7899363	GA	G	PASS	intron_variant	MODIFIER	LOC123384261	LOC123384261	transcript	XR_006595041.1	pseudogene	1	n.766+2234delT
chrA3	7899410	T	C	PASS	intron_variant	MODIFIER	LOC123384261	LOC123384261	transcript	XR_006595041.1	pseudogene	1	n.766+2188A>G
chrA3	7899460	A	AC	PASS	intron_variant	MODIFIER	LOC123384261	LOC123384261	transcript	XR_006595041.1	pseudogene	1	n.766+2137_766+2138insG
chrA3	7899703	G	A	PASS	intron_variant	MODIFIER	LOC123384261	LOC123384261	transcript	XR_006595041.1	pseudogene	1	n.766+1895C>T
chrA3	7899753	AATGCGG	A	PASS	intron_variant	MODIFIER	LOC123384261	LOC123384261	transcript	XR_006595041.1	pseudogene	1	n.766+1839_766+1844delCCGCAT
chrA3	7899996	C	T	PASS	intron_variant	MODIFIER	LOC123384261	LOC123384261	transcript	XR_006595041.1	pseudogene	1	n.766+1602G>A
chrA3	7916192	C	G	PASS	intron_variant	MODIFIER	DOK5	DOK5	transcript	XM_006929650.4	protein_coding	7	c.847-2790G>C
chrA3	7960898	G	T	PASS	intron_variant	MODIFIER	DOK5	DOK5	transcript	XM_006929650.4	protein_coding	3	c.286-6688C>A
chrA3	7960899	C	G	PASS	intron_variant	MODIFIER	DOK5	DOK5	transcript	XM_006929650.4	protein_coding	3	c.286-6689G>C
chrA3	7989005	G	A	PASS	intron_variant	MODIFIER	DOK5	DOK5	transcript	XM_006929650.4	protein_coding	2	c.178-3184C>T
chrA3	7993786	G	A	PASS	intron_variant	MODIFIER	DOK5	DOK5	transcript	XM_006929650.4	protein_coding	2	c.178-7965C>T
chrA3	8024994	G	A	PASS	intron_variant	MODIFIER	DOK5	DOK5	transcript	XM_006929650.4	protein_coding	2	c.177+25888C>T
[truncated: 21,994 more rows]

## Sheet: private_variants_heterozygous
Table S2. Private variants in the sequenced cat affected with hereditary methemoglobinemia. Private variants were obtained by filtering all variants that were present at least once in the 74 control genomes. This resulted in 90,816 heterozygous private variants for the affected cat. Please note that variants are listed multiple times, if they have predicted effects on more than one transcript.
#CHROM	POS	REF	ALT	FILTER	EFFECT	IMPACT	GENE	GENEID	FEATURE	FEATUREID	BIOTYPE	RANK	HGVS_C	HGVS_P
chrA1	61295	G	GGCAT	PASS	intergenic_region	MODIFIER	CHR_START-LOC102899061	CHR_START-LOC102899061	intergenic_region	CHR_START-LOC102899061		-1	n.61295_61296insGCAT
chrA1	375771	T	C	PASS	intergenic_region	MODIFIER	LOC102899369-ATP12A	LOC102899369-ATP12A	intergenic_region	LOC102899369-ATP12A		-1	n.375771T>C
chrA1	530854	C	A	PASS	intron_variant	MODIFIER	RNF17	RNF17	transcript	XM_045037204.1	protein_coding	22	c.3107+2450C>A
chrA1	578317	C	A	PASS	3_prime_UTR_variant	MODIFIER	CENPJ	CENPJ	transcript	XM_003980244.5	protein_coding	17	c.*972G>T
chrA1	578317	C	A	PASS	3_prime_UTR_variant	MODIFIER	CENPJ	CENPJ	transcript	XM_019815063.3	protein_coding	18	c.*972G>T
chrA1	578317	C	A	PASS	3_prime_UTR_variant	MODIFIER	CENPJ	CENPJ	transcript	XM_019815226.3	protein_coding	17	c.*972G>T
chrA1	578317	C	A	PASS	3_prime_UTR_variant	MODIFIER	CENPJ	CENPJ	transcript	XM_019815137.3	protein_coding	18	c.*972G>T
chrA1	578317	C	A	PASS	3_prime_UTR_variant	MODIFIER	CENPJ	CENPJ	transcript	XM_045037279.1	protein_coding	19	c.*972G>T
chrA1	578317	C	A	PASS	3_prime_UTR_variant	MODIFIER	CENPJ	CENPJ	transcript	XM_045037352.1	protein_coding	18	c.*972G>T
chrA1	578317	C	A	PASS	downstream_gene_variant	MODIFIER	RNF17	RNF17	transcript	XM_045037204.1	protein_coding	-1	c.*891C>A
chrA1	578317	C	A	PASS	downstream_gene_variant	MODIFIER	CENPJ	CENPJ	transcript	XM_019815312.3	protein_coding	-1	c.*1138G>T
chrA1	578317	C	A	PASS	downstream_gene_variant	MODIFIER	CENPJ	CENPJ	transcript	XM_006927146.5	protein_coding	-1	c.*1145G>T
chrA1	578318	T	TATATATATATATA	PASS	3_prime_UTR_variant	MODIFIER	CENPJ	CENPJ	transcript	XM_003980244.5	protein_coding	17	c.*970_*971insTATATATATATAT
chrA1	578318	T	TATATATATATATA	PASS	3_prime_UTR_variant	MODIFIER	CENPJ	CENPJ	transcript	XM_019815063.3	protein_coding	18	c.*970_*971insTATATATATATAT
chrA1	578318	T	TATATATATATATA	PASS	3_prime_UTR_variant	MODIFIER	CENPJ	CENPJ	transcript	XM_019815226.3	protein_coding	17	c.*970_*971insTATATATATATAT
chrA1	578318	T	TATATATATATATA	PASS	3_prime_UTR_variant	MODIFIER	CENPJ	CENPJ	transcript	XM_019815137.3	protein_coding	18	c.*970_*971insTATATATATATAT
chrA1	578318	T	TATATATATATATA	PASS	3_prime_UTR_variant	MODIFIER	CENPJ	CENPJ	transcript	XM_045037279.1	protein_coding	19	c.*970_*971insTATATATATATAT
chrA1	578318	T	TATATATATATATA	PASS	3_prime_UTR_variant	MODIFIER	CENPJ	CENPJ	transcript	XM_045037352.1	protein_coding	18	c.*970_*971insTATATATATATAT
chrA1	578318	T	TATATATATATATA	PASS	downstream_gene_variant	MODIFIER	RNF17	RNF17	transcript	XM_045037204.1	protein_coding	-1	c.*892_*893insATATATATATATA
chrA1	578318	T	TATATATATATATA	PASS	downstream_gene_variant	MODIFIER	CENPJ	CENPJ	transcript	XM_019815312.3	protein_coding	-1	c.*1136_*1137insTATATATATATAT
chrA1	578318	T	TATATATATATATA	PASS	downstream_gene_variant	MODIFIER	CENPJ	CENPJ	transcript	XM_006927146.5	protein_coding	-1	c.*1143_*1144insTATATATATATAT
chrA1	659563	G	A	PASS	missense_variant	MODERATE	PARP4	PARP4	transcript	XM_045037170.1	protein_coding	5	c.448G>A	p.Glu150Lys
chrA1	921850	A	T	PASS	intron_variant	MODIFIER	PSPC1	PSPC1	transcript	XM_006927147.4	protein_coding	1	c.366+3943T>A
chrA1	921850	A	T	PASS	intron_variant	MODIFIER	PSPC1	PSPC1	transcript	XR_002739420.2	pseudogene	1	n.512+3943T>A
chrA1	936771	C	T	PASS	intergenic_region	MODIFIER	PSPC1-ZMYM5	PSPC1-ZMYM5	intergenic_region	PSPC1-ZMYM5		-1	n.936771C>T
chrA1	1065905	ATATT	A	PASS	intergenic_region	MODIFIER	ZMYM5-ZMYM2	ZMYM5-ZMYM2	intergenic_region	ZMYM5-ZMYM2		-1	n.1065906_1065909delTATT
chrA1	1116580	T	TGTGC	PASS	intron_variant	MODIFIER	ZMYM2	ZMYM2	transcript	XM_019815621.3	protein_coding	10	c.2292+725_2292+726insGTGC
chrA1	1116580	T	TGTGC	PASS	intron_variant	MODIFIER	ZMYM2	ZMYM2	transcript	XM_019815692.3	protein_coding	10	c.2292+725_2292+726insGTGC
chrA1	1116580	T	TGTGC	PASS	intron_variant	MODIFIER	ZMYM2	ZMYM2	transcript	XM_019815643.2	protein_coding	11	c.2031+725_2031+726insGTGC
chrA1	1197547	A	G	PASS	downstream_gene_variant	MODIFIER	GJA3	GJA3	transcript	XM_023248644.2	protein_coding	-1	c.*5296T>C
chrA1	1197547	A	G	PASS	downstream_gene_variant	MODIFIER	GJA3	GJA3	transcript	XM_023248653.2	protein_coding	-1	c.*5296T>C
chrA1	1197547	A	G	PASS	intergenic_region	MODIFIER	LOC111558556-GJA3	LOC111558556-GJA3	intergenic_region	LOC111558556-GJA3		-1	n.1197547A>G
chrA1	1641045	TCTTA	T	PASS	intron_variant	MODIFIER	IFT88	IFT88	transcript	XM_045038717.1	protein_coding	3	c.171+7933_171+7936delCTTA
chrA1	1641045	TCTTA	T	PASS	intron_variant	MODIFIER	IFT88	IFT88	transcript	XM_023248988.2	protein_coding	2	c.91-8074_91-8071delCTTA
chrA1	1641045	TCTTA	T	PASS	intron_variant	MODIFIER	IFT88	IFT88	transcript	XM_023248958.2	protein_coding	3	c.153+7933_153+7936delCTTA
chrA1	1641045	TCTTA	T	PASS	intron_variant	MODIFIER	IFT88	IFT88	transcript	XM_023249016.2	protein_coding	2	c.-82+7933_-82+7936delCTTA
chrA1	1641045	TCTTA	T	PASS	intron_variant	MODIFIER	IFT88	IFT88	transcript	XM_023249045.2	protein_coding	2	c.-25+7933_-25+7936delCTTA
chrA1	1641045	TCTTA	T	PASS	intron_variant	MODIFIER	IFT88	IFT88	transcript	XM_023249092.2	protein_coding	2	c.80+12164_80+12167delCTTA
chrA1	1641045	TCTTA	T	PASS	intron_variant	MODIFIER	IFT88	IFT88	transcript	XM_045038904.1	protein_coding	1	c.-81-8074_-81-8071delCTTA
chrA1	1641045	TCTTA	T	PASS	intron_variant	MODIFIER	IFT88	IFT88	transcript	XM_045038830.1	protein_coding	3	c.171+7933_171+7936delCTTA
chrA1	1641045	TCTTA	T	PASS	intron_variant	MODIFIER	IFT88	IFT88	transcript	XM_045038985.1	protein_coding	3	c.171+7933_171+7936delCTTA
chrA1	1641045	TCTTA	T	PASS	intron_variant	MODIFIER	IFT88	IFT88	transcript	XM_045038787.1	protein_coding	3	c.171+7933_171+7936delCTTA
chrA1	1751765	G	A	PASS	intron_variant	MODIFIER	IFT88	IFT88	transcript	XM_045038717.1	protein_coding	24	c.2264-3673G>A
chrA1	1751765	G	A	PASS	intron_variant	MODIFIER	IFT88	IFT88	transcript	XM_023248988.2	protein_coding	23	c.2183-3673G>A
chrA1	1751765	G	A	PASS	intron_variant	MODIFIER	IFT88	IFT88	transcript	XM_023248958.2	protein_coding	24	c.2246-3673G>A
chrA1	1751765	G	A	PASS	intron_variant	MODIFIER	IFT88	IFT88	transcript	XM_023249016.2	protein_coding	23	c.2012-3673G>A
chrA1	1751765	G	A	PASS	intron_variant	MODIFIER	IFT88	IFT88	transcript	XM_023249045.2	protein_coding	22	c.2012-3673G>A
chrA1	1751765	G	A	PASS	intron_variant	MODIFIER	IFT88	IFT88	transcript	XM_023249092.2	protein_coding	19	c.1928-3673G>A
chrA1	1751765	G	A	PASS	intron_variant	MODIFIER	IFT88	IFT88	transcript	XM_045038904.1	protein_coding	22	c.2012-3673G>A
chrA1	1751765	G	A	PASS	intron_variant	MODIFIER	IFT88	IFT88	transcript	XM_045038787.1	protein_coding	23	c.2207-3673G>A
chrA1	1841764	T	C	PASS	intron_variant	MODIFIER	XPO4	XPO4	transcript	XM_003980253.6	protein_coding	13	c.1817+1579A>G
chrA1	1841764	T	C	PASS	intron_variant	MODIFIER	XPO4	XPO4	transcript	XM_019817033.2	protein_coding	13	c.1595+1579A>G
chrA1	1841764	T	C	PASS	intron_variant	MODIFIER	XPO4	XPO4	transcript	XM_006927154.4	protein_coding	14	c.1595+1579A>G
chrA1	1841764	T	C	PASS	intron_variant	MODIFIER	XPO4	XPO4	transcript	XM_019817077.3	protein_coding	14	c.1736+1579A>G
chrA1	1841764	T	C	PASS	intron_variant	MODIFIER	XPO4	XPO4	transcript	XM_023249438.2	protein_coding	13	c.1817+1579A>G
chrA1	1841764	T	C	PASS	intron_variant	MODIFIER	XPO4	XPO4	transcript	XM_019816971.3	protein_coding	13	c.1742+1579A>G
chrA1	2066865	AGGAG	A	PASS	frameshift_variant	HIGH	LOC109494173	LOC109494173	transcript	XM_045040409.1	protein_coding	2	c.235_238delAGGG	p.Arg79fs
chrA1	2066865	AGGAG	A	PASS	intron_variant	MODIFIER	LATS2	LATS2	transcript	XM_023249486.2	protein_coding	1	c.-212+603_-212+606delCTCC
chrA1	2066865	AGGAG	A	PASS	intron_variant	MODIFIER	LATS2	LATS2	transcript	XM_045039586.1	protein_coding	1	c.-212+603_-212+606delCTCC
chrA1	2211827	A	G	PASS	3_prime_UTR_variant	MODIFIER	ZDHHC20	ZDHHC20	transcript	XM_023249859.2	protein_coding	13	c.*549T>C
chrA1	2211827	A	G	PASS	3_prime_UTR_variant	MODIFIER	ZDHHC20	ZDHHC20	transcript	XM_045040032.1	protein_coding	12	c.*501T>C
chrA1	2211827	A	G	PASS	upstream_gene_variant	MODIFIER	LOC109494403	LOC109494403	transcript	XR_002149271.3	pseudogene	-1	n.-781A>G
chrA1	2211827	A	G	PASS	downstream_gene_variant	MODIFIER	ZDHHC20	ZDHHC20	transcript	XM_023249862.2	protein_coding	-1	c.*3540T>C
chrA1	2211827	A	G	PASS	intron_variant	MODIFIER	ZDHHC20	ZDHHC20	transcript	XR_006587011.1	pseudogene	10	n.2052+3398T>C
chrA1	2211827	A	G	PASS	intron_variant	MODIFIER	ZDHHC20	ZDHHC20	transcript	XR_006587018.1	pseudogene	10	n.862+3398T>C
chrA1	2211827	A	G	PASS	intron_variant	MODIFIER	ZDHHC20	ZDHHC20	transcript	XR_002740279.2	pseudogene	11	n.1164+3398T>C
chrA1	2211827	A	G	PASS	intron_variant	MODIFIER	ZDHHC20	ZDHHC20	transcript	XR_006586939.1	pseudogene	11	n.1164+3398T>C
chrA1	2211827	A	G	PASS	intron_variant	MODIFIER	ZDHHC20	ZDHHC20	transcript	XR_006586941.1	pseudogene	13	n.1456+294T>C
chrA1	2211827	A	G	PASS	intron_variant	MODIFIER	ZDHHC20	ZDHHC20	transcript	XM_045040067.1	protein_coding	11	c.1060+3398T>C
chrA1	2243801	TC	T	PASS	intron_variant	MODIFIER	ZDHHC20	ZDHHC20	transcript	XM_023249859.2	protein_coding	4	c.370+938delG
chrA1	2243801	TC	T	PASS	intron_variant	MODIFIER	ZDHHC20	ZDHHC20	transcript	XR_006587011.1	pseudogene	3	n.1362+938delG
chrA1	2243801	TC	T	PASS	intron_variant	MODIFIER	ZDHHC20	ZDHHC20	transcript	XR_006587018.1	pseudogene	3	n.172+938delG
chrA1	2243801	TC	T	PASS	intron_variant	MODIFIER	ZDHHC20	ZDHHC20	transcript	XR_002740279.2	pseudogene	4	n.474+938delG
chrA1	2243801	TC	T	PASS	intron_variant	MODIFIER	ZDHHC20	ZDHHC20	transcript	XR_006586939.1	pseudogene	4	n.474+938delG
chrA1	2243801	TC	T	PASS	intron_variant	MODIFIER	ZDHHC20	ZDHHC20	transcript	XR_006586941.1	pseudogene	4	n.473+938delG
chrA1	2243801	TC	T	PASS	intron_variant	MODIFIER	ZDHHC20	ZDHHC20	transcript	XM_045040067.1	protein_coding	4	c.370+938delG
chrA1	2243801	TC	T	PASS	intron_variant	MODIFIER	ZDHHC20	ZDHHC20	transcript	XM_045040032.1	protein_coding	4	c.370+938delG
chrA1	2243801	TC	T	PASS	intron_variant	MODIFIER	ZDHHC20	ZDHHC20	transcript	XM_023249862.2	protein_coding	4	c.370+938delG
chrA1	2243806	C	G	PASS	intron_variant	MODIFIER	ZDHHC20	ZDHHC20	transcript	XM_023249859.2	protein_coding	4	c.370+934G>C
chrA1	2243806	C	G	PASS	intron_variant	MODIFIER	ZDHHC20	ZDHHC20	transcript	XR_006587011.1	pseudogene	3	n.1362+934G>C
chrA1	2243806	C	G	PASS	intron_variant	MODIFIER	ZDHHC20	ZDHHC20	transcript	XR_006587018.1	pseudogene	3	n.172+934G>C
chrA1	2243806	C	G	PASS	intron_variant	MODIFIER	ZDHHC20	ZDHHC20	transcript	XR_002740279.2	pseudogene	4	n.474+934G>C
chrA1	2243806	C	G	PASS	intron_variant	MODIFIER	ZDHHC20	ZDHHC20	transcript	XR_006586939.1	pseudogene	4	n.474+934G>C
chrA1	2243806	C	G	PASS	intron_variant	MODIFIER	ZDHHC20	ZDHHC20	transcript	XR_006586941.1	pseudogene	4	n.473+934G>C
chrA1	2243806	C	G	PASS	intron_variant	MODIFIER	ZDHHC20	ZDHHC20	transcript	XM_045040067.1	protein_coding	4	c.370+934G>C
chrA1	2243806	C	G	PASS	intron_variant	MODIFIER	ZDHHC20	ZDHHC20	transcript	XM_045040032.1	protein_coding	4	c.370+934G>C
chrA1	2243806	C	G	PASS	intron_variant	MODIFIER	ZDHHC20	ZDHHC20	transcript	XM_023249862.2	protein_coding	4	c.370+934G>C
chrA1	2274740	C	T	PASS	intron_variant	MODIFIER	ZDHHC20	ZDHHC20	transcript	XM_023249859.2	protein_coding	1	c.118+5393G>A
chrA1	2274740	C	T	PASS	intron_variant	MODIFIER	ZDHHC20	ZDHHC20	transcript	XR_002740279.2	pseudogene	1	n.222+5393G>A
chrA1	2274740	C	T	PASS	intron_variant	MODIFIER	ZDHHC20	ZDHHC20	transcript	XR_006586939.1	pseudogene	1	n.222+5393G>A
chrA1	2274740	C	T	PASS	intron_variant	MODIFIER	ZDHHC20	ZDHHC20	transcript	XR_006586941.1	pseudogene	1	n.221+5393G>A
chrA1	2274740	C	T	PASS	intron_variant	MODIFIER	ZDHHC20	ZDHHC20	transcript	XM_045040067.1	protein_coding	1	c.118+5393G>A
chrA1	2274740	C	T	PASS	intron_variant	MODIFIER	ZDHHC20	ZDHHC20	transcript	XM_045040032.1	protein_coding	1	c.118+5393G>A
chrA1	2274740	C	T	PASS	intron_variant	MODIFIER	ZDHHC20	ZDHHC20	transcript	XM_023249862.2	protein_coding	1	c.118+5393G>A
chrA1	2343950	A	T	PASS	intron_variant	MODIFIER	MICU2	MICU2	transcript	XM_045040216.1	protein_coding	6	c.595-4468T>A
chrA1	2400155	C	G	PASS	intron_variant	MODIFIER	MICU2	MICU2	transcript	XM_045040216.1	protein_coding	2	c.355+12431G>C
chrA1	2546642	C	A	PASS	downstream_gene_variant	MODIFIER	FGF9	FGF9	transcript	XM_003980257.6	protein_coding	-1	c.*5972C>A
chrA1	2546642	C	A	PASS	intergenic_region	MODIFIER	FGF9-LOC123380866	FGF9-LOC123380866	intergenic_region	FGF9-LOC123380866		-1	n.2546642C>A
chrA1	2604475	T	C	PASS	intergenic_region	MODIFIER	FGF9-LOC123380866	FGF9-LOC123380866	intergenic_region	FGF9-LOC123380866		-1	n.2604475T>C
chrA1	2676881	T	C	PASS	intergenic_region	MODIFIER	LOC123380866-LOC123382191	LOC123380866-LOC123382191	intergenic_region	LOC123380866-LOC123382191		-1	n.2676881T>C
chrA1	2682015	G	A	PASS	upstream_gene_variant	MODIFIER	LOC123382191	LOC123382191	transcript	XR_006590247.1	pseudogene	-1	n.-2078G>A
chrA1	2682015	G	A	PASS	intergenic_region	MODIFIER	LOC123380866-LOC123382191	LOC123380866-LOC123382191	intergenic_region	LOC123380866-LOC123382191		-1	n.2682015G>A
chrA1	2682272	G	A	PASS	upstream_gene_variant	MODIFIER	LOC123382191	LOC123382191	transcript	XR_006590247.1	pseudogene	-1	n.-1821G>A
chrA1	2682272	G	A	PASS	intergenic_region	MODIFIER	LOC123380866-LOC123382191	LOC123380866-LOC123382191	intergenic_region	LOC123380866-LOC123382191		-1	n.2682272G>A
chrA1	2682712	T	C	PASS	upstream_gene_variant	MODIFIER	LOC123382191	LOC123382191	transcript	XR_006590247.1	pseudogene	-1	n.-1381T>C
chrA1	2682712	T	C	PASS	intergenic_region	MODIFIER	LOC123380866-LOC123382191	LOC123380866-LOC123382191	intergenic_region	LOC123380866-LOC123382191		-1	n.2682712T>C
chrA1	2683801	C	A	PASS	upstream_gene_variant	MODIFIER	LOC123382191	LOC123382191	transcript	XR_006590247.1	pseudogene	-1	n.-292C>A
chrA1	2683801	C	A	PASS	intergenic_region	MODIFIER	LOC123380866-LOC123382191	LOC123380866-LOC123382191	intergenic_region	LOC123380866-LOC123382191		-1	n.2683801C>A
chrA1	2684020	G	C	PASS	upstream_gene_variant	MODIFIER	LOC123382191	LOC123382191	transcript	XR_006590247.1	pseudogene	-1	n.-73G>C
chrA1	2684020	G	C	PASS	intergenic_region	MODIFIER	LOC123380866-LOC123382191	LOC123380866-LOC123382191	intergenic_region	LOC123380866-LOC123382191		-1	n.2684020G>C
chrA1	2684100	C	A	PASS	non_coding_transcript_exon_variant	MODIFIER	LOC123382191	LOC123382191	transcript	XR_006590247.1	pseudogene	1	n.8C>A
chrA1	2684300	C	T	PASS	intron_variant	MODIFIER	LOC123382191	LOC123382191	transcript	XR_006590247.1	pseudogene	1	n.77+131C>T
chrA1	2684655	T	TG	PASS	intron_variant	MODIFIER	LOC123382191	LOC123382191	transcript	XR_006590247.1	pseudogene	1	n.77+486_77+487insG
chrA1	2684967	A	G	PASS	intron_variant	MODIFIER	LOC123382191	LOC123382191	transcript	XR_006590247.1	pseudogene	1	n.77+798A>G
chrA1	2685008	A	G	PASS	intron_variant	MODIFIER	LOC123382191	LOC123382191	transcript	XR_006590247.1	pseudogene	1	n.77+839A>G
chrA1	2685009	A	G	PASS	intron_variant	MODIFIER	LOC123382191	LOC123382191	transcript	XR_006590247.1	pseudogene	1	n.77+840A>G
chrA1	2685277	C	T	PASS	intron_variant	MODIFIER	LOC123382191	LOC123382191	transcript	XR_006590247.1	pseudogene	1	n.77+1108C>T
chrA1	2685365	G	A	PASS	intron_variant	MODIFIER	LOC123382191	LOC123382191	transcript	XR_006590247.1	pseudogene	1	n.78-1071G>A
chrA1	2685652	GTT	G	PASS	intron_variant	MODIFIER	LOC123382191	LOC123382191	transcript	XR_006590247.1	pseudogene	1	n.78-783_78-782delTT
chrA1	2685655	AC	A	PASS	intron_variant	MODIFIER	LOC123382191	LOC123382191	transcript	XR_006590247.1	pseudogene	1	n.78-780delC
chrA1	2687550	G	A	PASS	downstream_gene_variant	MODIFIER	LOC123382191	LOC123382191	transcript	XR_006590247.1	pseudogene	-1	n.*971G>A
chrA1	2687550	G	A	PASS	intergenic_region	MODIFIER	LOC123382191-LOC111556740	LOC123382191-LOC111556740	intergenic_region	LOC123382191-LOC111556740		-1	n.2687550G>A
chrA1	2687668	G	A	PASS	downstream_gene_variant	MODIFIER	LOC123382191	LOC123382191	transcript	XR_006590247.1	pseudogene	-1	n.*1089G>A
chrA1	2687668	G	A	PASS	intergenic_region	MODIFIER	LOC123382191-LOC111556740	LOC123382191-LOC111556740	intergenic_region	LOC123382191-LOC111556740		-1	n.2687668G>A
chrA1	2778207	G	A	PASS	intergenic_region	MODIFIER	LOC123382191-LOC111556740	LOC123382191-LOC111556740	intergenic_region	LOC123382191-LOC111556740		-1	n.2778207G>A
chrA1	2796390	A	G	PASS	intergenic_region	MODIFIER	LOC123382191-LOC111556740	LOC123382191-LOC111556740	intergenic_region	LOC123382191-LOC111556740		-1	n.2796390A>G
chrA1	2847455	C	T	PASS	intergenic_region	MODIFIER	LOC123382191-LOC111556740	LOC123382191-LOC111556740	intergenic_region	LOC123382191-LOC111556740		-1	n.2847455C>T
chrA1	2878955	G	A	PASS	intergenic_region	MODIFIER	LOC123382191-LOC111556740	LOC123382191-LOC111556740	intergenic_region	LOC123382191-LOC111556740		-1	n.2878955G>A
chrA1	2901500	G	A	PASS	intergenic_region	MODIFIER	LOC123382191-LOC111556740	LOC123382191-LOC111556740	intergenic_region	LOC123382191-LOC111556740		-1	n.2901500G>A
chrA1	2965301	A	G	PASS	intergenic_region	MODIFIER	LOC111556740-LOC123380876	LOC111556740-LOC123380876	intergenic_region	LOC111556740-LOC123380876		-1	n.2965301A>G
chrA1	2979008	A	G	PASS	intergenic_region	MODIFIER	LOC111556740-LOC123380876	LOC111556740-LOC123380876	intergenic_region	LOC111556740-LOC123380876		-1	n.2979008A>G
chrA1	3109177	C	A	PASS	intergenic_region	MODIFIER	LOC123380876-LOC123382251	LOC123380876-LOC123382251	intergenic_region	LOC123380876-LOC123382251		-1	n.3109177C>A
chrA1	3111401	T	TAAAA	PASS	intergenic_region	MODIFIER	LOC123380876-LOC123382251	LOC123380876-LOC123382251	intergenic_region	LOC123380876-LOC123382251		-1	n.3111401_3111402insAAAA
chrA1	3111410	A	G	PASS	intergenic_region	MODIFIER	LOC123380876-LOC123382251	LOC123380876-LOC123382251	intergenic_region	LOC123380876-LOC123382251		-1	n.3111410A>G
chrA1	3111412	T	TCC	PASS	intergenic_region	MODIFIER	LOC123380876-LOC123382251	LOC123380876-LOC123382251	intergenic_region	LOC123380876-LOC123382251		-1	n.3111412_3111413insCC
chrA1	3111414	T	TTTGC	PASS	intergenic_region	MODIFIER	LOC123380876-LOC123382251	LOC123380876-LOC123382251	intergenic_region	LOC123380876-LOC123382251		-1	n.3111414_3111415insTTGC
chrA1	3117398	G	A	PASS	intergenic_region	MODIFIER	LOC123380876-LOC123382251	LOC123380876-LOC123382251	intergenic_region	LOC123380876-LOC123382251		-1	n.3117398G>A
chrA1	3203968	C	T	PASS	intergenic_region	MODIFIER	LOC123382251-LOC109492527	LOC123382251-LOC109492527	intergenic_region	LOC123382251-LOC109492527		-1	n.3203968C>T
chrA1	3254698	C	T	PASS	intergenic_region	MODIFIER	LOC109492527-LOC109492533	LOC109492527-LOC109492533	intergenic_region	LOC109492527-LOC109492533		-1	n.3254698C>T
chrA1	3372952	C	T	PASS	intron_variant	MODIFIER	LOC109492533	LOC109492533	transcript	XR_006587249.1	pseudogene	2	n.260-2435C>T
chrA1	3521839	G	T	PASS	intergenic_region	MODIFIER	LOC109492534-LOC109497810	LOC109492534-LOC109497810	intergenic_region	LOC109492534-LOC109497810		-1	n.3521839G>T
chrA1	3563679	AG	A	PASS	intergenic_region	MODIFIER	LOC109492534-LOC109497810	LOC109492534-LOC109497810	intergenic_region	LOC109492534-LOC109497810		-1	n.3563680delG
chrA1	3589428	T	C	PASS	intergenic_region	MODIFIER	LOC109492534-LOC109497810	LOC109492534-LOC109497810	intergenic_region	LOC109492534-LOC109497810		-1	n.3589428T>C
chrA1	3594716	C	A	PASS	intergenic_region	MODIFIER	LOC109492534-LOC109497810	LOC109492534-LOC109497810	intergenic_region	LOC109492534-LOC109497810		-1	n.3594716C>A
chrA1	3607686	TTG	T	PASS	intergenic_region	MODIFIER	LOC109492534-LOC109497810	LOC109492534-LOC109497810	intergenic_region	LOC109492534-LOC109497810		-1	n.3607687_3607688delTG
chrA1	3711097	A	C	PASS	intergenic_region	MODIFIER	LOC109492534-LOC109497810	LOC109492534-LOC109497810	intergenic_region	LOC109492534-LOC109497810		-1	n.3711097A>C
chrA1	3827692	C	T	PASS	intergenic_region	MODIFIER	LOC123380919-SGCG	LOC123380919-SGCG	intergenic_region	LOC123380919-SGCG		-1	n.3827692C>T
chrA1	3866088	AAT	A	PASS	upstream_gene_variant	MODIFIER	SGCG	SGCG	transcript	XM_003980258.6	protein_coding	-1	c.-644_-643delAT
chrA1	3866088	AAT	A	PASS	intron_variant	MODIFIER	SGCG	SGCG	transcript	XM_023249893.2	protein_coding	1	c.190-24086_190-24085delAT
chrA1	3866088	AAT	A	PASS	intron_variant	MODIFIER	SGCG	SGCG	transcript	XM_045040827.1	protein_coding	1	c.190-24086_190-24085delAT
chrA1	3866088	AAT	A	PASS	intron_variant	MODIFIER	SGCG	SGCG	transcript	XM_045040864.1	protein_coding	1	c.190-24086_190-24085delAT
chrA1	3866088	AAT	A	PASS	intron_variant	MODIFIER	SGCG	SGCG	transcript	XM_045040907.1	protein_coding	1	c.189+26939_189+26940delAT
chrA1	3866088	AAT	A	PASS	intron_variant	MODIFIER	SGCG	SGCG	transcript	XM_023249897.2	protein_coding	1	c.190-24086_190-24085delAT
chrA1	3932696	C	CCCAGG	ReadPosRankSum-2	intron_variant	MODIFIER	SGCG	SGCG	transcript	XM_023249893.2	protein_coding	4	c.575-802_575-801insCCAGG
chrA1	3932696	C	CCCAGG	ReadPosRankSum-2	intron_variant	MODIFIER	SGCG	SGCG	transcript	XM_045040827.1	protein_coding	4	c.575-802_575-801insCCAGG
chrA1	3932696	C	CCCAGG	ReadPosRankSum-2	intron_variant	MODIFIER	SGCG	SGCG	transcript	XM_045040864.1	protein_coding	4	c.575-802_575-801insCCAGG
chrA1	3932696	C	CCCAGG	ReadPosRankSum-2	intron_variant	MODIFIER	SGCG	SGCG	transcript	XM_045040907.1	protein_coding	3	c.380-802_380-801insCCAGG
chrA1	3932696	C	CCCAGG	ReadPosRankSum-2	intron_variant	MODIFIER	SGCG	SGCG	transcript	XM_023249897.2	protein_coding	4	c.575-802_575-801insCCAGG
chrA1	3932696	C	CCCAGG	ReadPosRankSum-2	intron_variant	MODIFIER	SGCG	SGCG	transcript	XM_003980258.6	protein_coding	4	c.551-802_551-801insCCAGG
chrA1	4074725	A	G	PASS	intergenic_region	MODIFIER	SACS-LOC123381086	SACS-LOC123381086	intergenic_region	SACS-LOC123381086		-1	n.4074725A>G
chrA1	4108868	CCA	C	PASS	intergenic_region	MODIFIER	SACS-LOC123381086	SACS-LOC123381086	intergenic_region	SACS-LOC123381086		-1	n.4108869_4108870delCA
chrA1	4108873	T	G	PASS	intergenic_region	MODIFIER	SACS-LOC123381086	SACS-LOC123381086	intergenic_region	SACS-LOC123381086		-1	n.4108873T>G
chrA1	4108882	T	G	PASS	intergenic_region	MODIFIER	SACS-LOC123381086	SACS-LOC123381086	intergenic_region	SACS-LOC123381086		-1	n.4108882T>G
chrA1	4108883	A	G	PASS	intergenic_region	MODIFIER	SACS-LOC123381086	SACS-LOC123381086	intergenic_region	SACS-LOC123381086		-1	n.4108883A>G
chrA1	4122622	G	A	PASS	intergenic_region	MODIFIER	SACS-LOC123381086	SACS-LOC123381086	intergenic_region	SACS-LOC123381086		-1	n.4122622G>A
chrA1	4186872	A	C	PASS	intergenic_region	MODIFIER	LOC123381086-TNFRSF19	LOC123381086-TNFRSF19	intergenic_region	LOC123381086-TNFRSF19		-1	n.4186872A>C
chrA1	4253972	C	T	PASS	intron_variant	MODIFIER	TNFRSF19	TNFRSF19	transcript	XM_011280485.4	protein_coding	5	c.508+12627C>T
chrA1	4253972	C	T	PASS	intron_variant	MODIFIER	TNFRSF19	TNFRSF19	transcript	XM_019819279.3	protein_coding	5	c.445+12627C>T
chrA1	4253972	C	T	PASS	intron_variant	MODIFIER	TNFRSF19	TNFRSF19	transcript	XM_019819241.3	protein_coding	5	c.445+12627C>T
chrA1	4253972	C	T	PASS	intron_variant	MODIFIER	TNFRSF19	TNFRSF19	transcript	XM_023249934.2	protein_coding	5	c.445+12627C>T
chrA1	4253972	C	T	PASS	intron_variant	MODIFIER	TNFRSF19	TNFRSF19	transcript	XM_006927167.5	protein_coding	5	c.508+12627C>T
chrA1	4253972	C	T	PASS	intron_variant	MODIFIER	TNFRSF19	TNFRSF19	transcript	XM_023249941.2	protein_coding	5	c.508+12627C>T
chrA1	4253972	C	T	PASS	intron_variant	MODIFIER	TNFRSF19	TNFRSF19	transcript	XM_019819168.3	protein_coding	5	c.508+12627C>T
chrA1	4253972	C	T	PASS	intron_variant	MODIFIER	TNFRSF19	TNFRSF19	transcript	XM_019819307.2	protein_coding	3	c.145+12627C>T
chrA1	4341344	G	A	PASS	intron_variant	MODIFIER	MIPEP	MIPEP	transcript	XM_045041638.1	protein_coding	18	c.2044+13913C>T
chrA1	4341344	G	A	PASS	intron_variant	MODIFIER	MIPEP	MIPEP	transcript	XM_045041906.1	protein_coding	16	c.1597+13913C>T
chrA1	4341344	G	A	PASS	intron_variant	MODIFIER	MIPEP	MIPEP	transcript	XM_045041790.1	protein_coding	17	c.1922+13913C>T
chrA1	4341344	G	A	PASS	intron_variant	MODIFIER	MIPEP	MIPEP	transcript	XM_045041709.1	protein_coding	16	c.1849+13913C>T
chrA1	4341344	G	A	PASS	intron_variant	MODIFIER	MIPEP	MIPEP	transcript	XM_003980259.6	protein_coding	18	c.2045-11845C>T
chrA1	4341344	G	A	PASS	intron_variant	MODIFIER	MIPEP	MIPEP	transcript	XM_006927168.4	protein_coding	16	c.1849-11845C>T
chrA1	4341344	G	A	PASS	intron_variant	MODIFIER	MIPEP	MIPEP	transcript	XM_045041758.1	protein_coding	17	c.1923-11845C>T
chrA1	4565836	TGGAAAACGA	T	PASS	downstream_gene_variant	MODIFIER	LOC109494916	LOC109494916	transcript	XR_002740359.2	pseudogene	-1	n.*3795_*3803delGGAAAACGA
chrA1	4565836	TGGAAAACGA	T	PASS	downstream_gene_variant	MODIFIER	LOC109494916	LOC109494916	transcript	XR_006588426.1	pseudogene	-1	n.*3795_*3803delGGAAAACGA
chrA1	4565836	TGGAAAACGA	T	PASS	downstream_gene_variant	MODIFIER	LOC109494916	LOC109494916	transcript	XR_002740360.2	pseudogene	-1	n.*3795_*3803delGGAAAACGA
chrA1	4565836	TGGAAAACGA	T	PASS	intron_variant	MODIFIER	SPATA13	SPATA13	transcript	XM_045041098.1	protein_coding	5	c.2302+712_2302+720delTCGTTTTCC
chrA1	4565836	TGGAAAACGA	T	PASS	intron_variant	MODIFIER	SPATA13	SPATA13	transcript	XM_045041159.1	protein_coding	5	c.2302+712_2302+720delTCGTTTTCC
chrA1	4565836	TGGAAAACGA	T	PASS	intron_variant	MODIFIER	SPATA13	SPATA13	transcript	XM_045041126.1	protein_coding	5	c.2302+712_2302+720delTCGTTTTCC
chrA1	4565836	TGGAAAACGA	T	PASS	intron_variant	MODIFIER	SPATA13	SPATA13	transcript	XM_045041231.1	protein_coding	4	c.2092+712_2092+720delTCGTTTTCC
chrA1	4565836	TGGAAAACGA	T	PASS	intron_variant	MODIFIER	SPATA13	SPATA13	transcript	XM_045041265.1	protein_coding	4	c.1936+712_1936+720delTCGTTTTCC
chrA1	4565836	TGGAAAACGA	T	PASS	intron_variant	MODIFIER	SPATA13	SPATA13	transcript	XM_019819646.3	protein_coding	3	c.574+712_574+720delTCGTTTTCC
chrA1	4565836	TGGAAAACGA	T	PASS	intron_variant	MODIFIER	SPATA13	SPATA13	transcript	XM_045041193.1	protein_coding	5	c.2302+712_2302+720delTCGTTTTCC
chrA1	4637179	C	T	PASS	intron_variant	MODIFIER	SPATA13	SPATA13	transcript	XM_045041098.1	protein_coding	2	c.49-41747G>A
chrA1	4637179	C	T	PASS	intron_variant	MODIFIER	SPATA13	SPATA13	transcript	XM_045041159.1	protein_coding	2	c.49-41747G>A
chrA1	4637179	C	T	PASS	intron_variant	MODIFIER	SPATA13	SPATA13	transcript	XM_045041126.1	protein_coding	2	c.49-41747G>A
chrA1	4637179	C	T	PASS	intron_variant	MODIFIER	SPATA13	SPATA13	transcript	XM_045041231.1	protein_coding	1	c.-163+23783G>A
chrA1	4637179	C	T	PASS	intron_variant	MODIFIER	SPATA13	SPATA13	transcript	XM_045041265.1	protein_coding	2	c.49-41747G>A
chrA1	4637179	C	T	PASS	intron_variant	MODIFIER	SPATA13	SPATA13	transcript	XM_045041193.1	protein_coding	2	c.49-41747G>A
chrA1	4637529	T	C	PASS	intron_variant	MODIFIER	SPATA13	SPATA13	transcript	XM_045041098.1	protein_coding	2	c.49-42097A>G
chrA1	4637529	T	C	PASS	intron_variant	MODIFIER	SPATA13	SPATA13	transcript	XM_045041159.1	protein_coding	2	c.49-42097A>G
chrA1	4637529	T	C	PASS	intron_variant	MODIFIER	SPATA13	SPATA13	transcript	XM_045041126.1	protein_coding	2	c.49-42097A>G
chrA1	4637529	T	C	PASS	intron_variant	MODIFIER	SPATA13	SPATA13	transcript	XM_045041231.1	protein_coding	1	c.-163+23433A>G
chrA1	4637529	T	C	PASS	intron_variant	MODIFIER	SPATA13	SPATA13	transcript	XM_045041265.1	protein_coding	2	c.49-42097A>G
chrA1	4637529	T	C	PASS	intron_variant	MODIFIER	SPATA13	SPATA13	transcript	XM_045041193.1	protein_coding	2	c.49-42097A>G
chrA1	4677777	TCTCTGTGC	T	PASS	intron_variant	MODIFIER	SPATA13	SPATA13	transcript	XM_045041098.1	protein_coding	2	c.49-82353_49-82346delGCACAGAG
chrA1	4677777	TCTCTGTGC	T	PASS	intron_variant	MODIFIER	LOC109494931	LOC109494931	transcript	XR_002150101.3	pseudogene	1	n.324-2123_324-2116delCTCTGTGC
chrA1	4677777	TCTCTGTGC	T	PASS	intron_variant	MODIFIER	SPATA13	SPATA13	transcript	XM_045041159.1	protein_coding	2	c.49-82353_49-82346delGCACAGAG
chrA1	4677777	TCTCTGTGC	T	PASS	intron_variant	MODIFIER	SPATA13	SPATA13	transcript	XM_045041126.1	protein_coding	2	c.49-82353_49-82346delGCACAGAG
chrA1	4677777	TCTCTGTGC	T	PASS	intron_variant	MODIFIER	SPATA13	SPATA13	transcript	XM_045041265.1	protein_coding	2	c.49-82353_49-82346delGCACAGAG
chrA1	4677777	TCTCTGTGC	T	PASS	intron_variant	MODIFIER	SPATA13	SPATA13	transcript	XM_045041193.1	protein_coding	2	c.49-82353_49-82346delGCACAGAG
chrA1	4677777	TCTCTGTGC	T	PASS	intron_variant	MODIFIER	LOC109494931	LOC109494931	transcript	XR_002150109.3	pseudogene	1	n.309-2123_309-2116delCTCTGTGC
chrA1	4677777	TCTCTGTGC	T	PASS	intron_variant	MODIFIER	LOC109494931	LOC109494931	transcript	XR_006588402.1	pseudogene	1	n.307-4479_307-4472delCTCTGTGC
chrA1	4677777	TCTCTGTGC	T	PASS	intron_variant	MODIFIER	LOC109494931	LOC109494931	transcript	XR_006588399.1	pseudogene	1	n.291-5295_291-5288delCTCTGTGC
chrA1	4793025	TTTTTG	T	PASS	intron_variant	MODIFIER	SPATA13	SPATA13	transcript	XM_045041098.1	protein_coding	2	c.48+21530_48+21534delCAAAA
chrA1	4793025	TTTTTG	T	PASS	intron_variant	MODIFIER	SPATA13	SPATA13	transcript	XM_045041159.1	protein_coding	2	c.48+21530_48+21534delCAAAA
chrA1	4793025	TTTTTG	T	PASS	intron_variant	MODIFIER	SPATA13	SPATA13	transcript	XM_045041126.1	protein_coding	2	c.48+21530_48+21534delCAAAA
chrA1	4793025	TTTTTG	T	PASS	intron_variant	MODIFIER	SPATA13	SPATA13	transcript	XM_045041265.1	protein_coding	2	c.48+21530_48+21534delCAAAA
chrA1	4793025	TTTTTG	T	PASS	intron_variant	MODIFIER	SPATA13	SPATA13	transcript	XM_045041193.1	protein_coding	2	c.48+21530_48+21534delCAAAA
chrA1	4842571	C	A	PASS	intron_variant	MODIFIER	SPATA13	SPATA13	transcript	XM_045041098.1	protein_coding	1	c.12+17191G>T
chrA1	4842571	C	A	PASS	intron_variant	MODIFIER	SPATA13	SPATA13	transcript	XM_045041159.1	protein_coding	1	c.12+17191G>T
chrA1	4842571	C	A	PASS	intron_variant	MODIFIER	SPATA13	SPATA13	transcript	XM_045041126.1	protein_coding	1	c.12+17191G>T
chrA1	4842571	C	A	PASS	intron_variant	MODIFIER	SPATA13	SPATA13	transcript	XM_045041265.1	protein_coding	1	c.12+17191G>T
chrA1	4842571	C	A	PASS	intron_variant	MODIFIER	SPATA13	SPATA13	transcript	XM_045041193.1	protein_coding	1	c.12+17191G>T
chrA1	5110945	C	T	PASS	intron_variant	MODIFIER	NUP58	NUP58	transcript	XM_023250027.2	protein_coding	5	c.650-961C>T
chrA1	5110945	C	T	PASS	intron_variant	MODIFIER	NUP58	NUP58	transcript	XM_045043059.1	protein_coding	5	c.650-961C>T
chrA1	5110945	C	T	PASS	intron_variant	MODIFIER	NUP58	NUP58	transcript	XM_023250028.2	protein_coding	5	c.650-961C>T
chrA1	5157083	C	CG	PASS	intron_variant	MODIFIER	LOC111559502	LOC111559502	transcript	XM_045043128.1	protein_coding	3	c.628-76_628-75insC
chrA1	5157090	C	G	PASS	intron_variant	MODIFIER	LOC111559502	LOC111559502	transcript	XM_045043128.1	protein_coding	3	c.628-82G>C
chrA1	5327384	ACTGT	A	PASS	intron_variant	MODIFIER	ATP8A2	ATP8A2	transcript	XM_045043082.1	protein_coding	10	c.904-857_904-854delCTGT
chrA1	5327384	ACTGT	A	PASS	intron_variant	MODIFIER	ATP8A2	ATP8A2	transcript	XM_006927173.5	protein_coding	10	c.772-857_772-854delCTGT
chrA1	5327384	ACTGT	A	PASS	intron_variant	MODIFIER	ATP8A2	ATP8A2	transcript	XM_023250034.2	protein_coding	10	c.892-857_892-854delCTGT
chrA1	5327384	ACTGT	A	PASS	intron_variant	MODIFIER	ATP8A2	ATP8A2	transcript	XM_019820599.3	protein_coding	10	c.856-857_856-854delCTGT
chrA1	5327384	ACTGT	A	PASS	intron_variant	MODIFIER	ATP8A2	ATP8A2	transcript	XM_045043371.1	protein_coding	10	c.904-857_904-854delCTGT
chrA1	5327384	ACTGT	A	PASS	intron_variant	MODIFIER	ATP8A2	ATP8A2	transcript	XM_045043107.1	protein_coding	10	c.904-857_904-854delCTGT
chrA1	5327384	ACTGT	A	PASS	intron_variant	MODIFIER	ATP8A2	ATP8A2	transcript	XM_045043172.1	protein_coding	10	c.904-857_904-854delCTGT
chrA1	5327384	ACTGT	A	PASS	intron_variant	MODIFIER	ATP8A2	ATP8A2	transcript	XM_045043129.1	protein_coding	10	c.904-857_904-854delCTGT
chrA1	5327384	ACTGT	A	PASS	intron_variant	MODIFIER	ATP8A2	ATP8A2	transcript	XR_006588849.1	pseudogene	10	n.949-857_949-854delCTGT
chrA1	5327384	ACTGT	A	PASS	intron_variant	MODIFIER	ATP8A2	ATP8A2	transcript	XM_045043251.1	protein_coding	10	c.820-857_820-854delCTGT
chrA1	5327384	ACTGT	A	PASS	intron_variant	MODIFIER	ATP8A2	ATP8A2	transcript	XM_045043308.1	protein_coding	10	c.772-857_772-854delCTGT
chrA1	5327384	ACTGT	A	PASS	intron_variant	MODIFIER	ATP8A2	ATP8A2	transcript	XM_019820968.3	protein_coding	10	c.772-857_772-854delCTGT
chrA1	5338834	G	A	PASS	intron_variant	MODIFIER	ATP8A2	ATP8A2	transcript	XM_045043082.1	protein_coding	14	c.1364+1174G>A
chrA1	5338834	G	A	PASS	intron_variant	MODIFIER	ATP8A2	ATP8A2	transcript	XM_006927173.5	protein_coding	14	c.1232+1174G>A
chrA1	5338834	G	A	PASS	intron_variant	MODIFIER	ATP8A2	ATP8A2	transcript	XM_023250034.2	protein_coding	14	c.1352+1174G>A
chrA1	5338834	G	A	PASS	intron_variant	MODIFIER	ATP8A2	ATP8A2	transcript	XM_019820599.3	protein_coding	14	c.1316+1174G>A
chrA1	5338834	G	A	PASS	intron_variant	MODIFIER	ATP8A2	ATP8A2	transcript	XM_045043371.1	protein_coding	14	c.1364+1174G>A
chrA1	5338834	G	A	PASS	intron_variant	MODIFIER	ATP8A2	ATP8A2	transcript	XM_045043107.1	protein_coding	14	c.1364+1174G>A
chrA1	5338834	G	A	PASS	intron_variant	MODIFIER	ATP8A2	ATP8A2	transcript	XM_045043172.1	protein_coding	14	c.1364+1174G>A
chrA1	5338834	G	A	PASS	intron_variant	MODIFIER	ATP8A2	ATP8A2	transcript	XM_045043129.1	protein_coding	14	c.1364+1174G>A
chrA1	5338834	G	A	PASS	intron_variant	MODIFIER	ATP8A2	ATP8A2	transcript	XR_006588849.1	pseudogene	14	n.1409+1174G>A
chrA1	5338834	G	A	PASS	intron_variant	MODIFIER	ATP8A2	ATP8A2	transcript	XM_045043251.1	protein_coding	14	c.1280+1174G>A
chrA1	5338834	G	A	PASS	intron_variant	MODIFIER	ATP8A2	ATP8A2	transcript	XM_045043308.1	protein_coding	14	c.1232+1174G>A
chrA1	5338834	G	A	PASS	intron_variant	MODIFIER	ATP8A2	ATP8A2	transcript	XM_019820968.3	protein_coding	14	c.1232+1174G>A
chrA1	5341348	G	T	PASS	intron_variant	MODIFIER	ATP8A2	ATP8A2	transcript	XM_045043082.1	protein_coding	14	c.1365-775G>T
chrA1	5341348	G	T	PASS	intron_variant	MODIFIER	ATP8A2	ATP8A2	transcript	XM_006927173.5	protein_coding	14	c.1233-775G>T
chrA1	5341348	G	T	PASS	intron_variant	MODIFIER	ATP8A2	ATP8A2	transcript	XM_023250034.2	protein_coding	14	c.1353-775G>T
chrA1	5341348	G	T	PASS	intron_variant	MODIFIER	ATP8A2	ATP8A2	transcript	XM_019820599.3	protein_coding	14	c.1317-775G>T
chrA1	5341348	G	T	PASS	intron_variant	MODIFIER	ATP8A2	ATP8A2	transcript	XM_045043371.1	protein_coding	14	c.1365-775G>T
chrA1	5341348	G	T	PASS	intron_variant	MODIFIER	ATP8A2	ATP8A2	transcript	XM_045043107.1	protein_coding	14	c.1365-775G>T
chrA1	5341348	G	T	PASS	intron_variant	MODIFIER	ATP8A2	ATP8A2	transcript	XM_045043172.1	protein_coding	14	c.1365-775G>T
chrA1	5341348	G	T	PASS	intron_variant	MODIFIER	ATP8A2	ATP8A2	transcript	XM_045043129.1	protein_coding	14	c.1365-775G>T
chrA1	5341348	G	T	PASS	intron_variant	MODIFIER	ATP8A2	ATP8A2	transcript	XR_006588849.1	pseudogene	14	n.1410-775G>T
chrA1	5341348	G	T	PASS	intron_variant	MODIFIER	ATP8A2	ATP8A2	transcript	XM_045043251.1	protein_coding	14	c.1281-775G>T
chrA1	5341348	G	T	PASS	intron_variant	MODIFIER	ATP8A2	ATP8A2	transcript	XM_045043308.1	protein_coding	14	c.1233-775G>T
chrA1	5341348	G	T	PASS	intron_variant	MODIFIER	ATP8A2	ATP8A2	transcript	XM_019820968.3	protein_coding	14	c.1233-775G>T
chrA1	5342664	G	A	PASS	intron_variant	MODIFIER	ATP8A2	ATP8A2	transcript	XM_045043082.1	protein_coding	15	c.1409+497G>A
chrA1	5342664	G	A	PASS	intron_variant	MODIFIER	ATP8A2	ATP8A2	transcript	XM_006927173.5	protein_coding	15	c.1277+497G>A
chrA1	5342664	G	A	PASS	intron_variant	MODIFIER	ATP8A2	ATP8A2	transcript	XM_023250034.2	protein_coding	15	c.1397+497G>A
chrA1	5342664	G	A	PASS	intron_variant	MODIFIER	ATP8A2	ATP8A2	transcript	XM_019820599.3	protein_coding	15	c.1361+497G>A
chrA1	5342664	G	A	PASS	intron_variant	MODIFIER	ATP8A2	ATP8A2	transcript	XM_045043371.1	protein_coding	15	c.1409+497G>A
chrA1	5342664	G	A	PASS	intron_variant	MODIFIER	ATP8A2	ATP8A2	transcript	XM_045043107.1	protein_coding	15	c.1409+497G>A
chrA1	5342664	G	A	PASS	intron_variant	MODIFIER	ATP8A2	ATP8A2	transcript	XM_045043172.1	protein_coding	15	c.1409+497G>A
chrA1	5342664	G	A	PASS	intron_variant	MODIFIER	ATP8A2	ATP8A2	transcript	XM_045043129.1	protein_coding	15	c.1409+497G>A
chrA1	5342664	G	A	PASS	intron_variant	MODIFIER	ATP8A2	ATP8A2	transcript	XR_006588849.1	pseudogene	15	n.1454+497G>A
chrA1	5342664	G	A	PASS	intron_variant	MODIFIER	ATP8A2	ATP8A2	transcript	XM_045043251.1	protein_coding	15	c.1325+497G>A
chrA1	5342664	G	A	PASS	intron_variant	MODIFIER	ATP8A2	ATP8A2	transcript	XM_045043308.1	protein_coding	15	c.1277+497G>A
chrA1	5342664	G	A	PASS	intron_variant	MODIFIER	ATP8A2	ATP8A2	transcript	XM_019820968.3	protein_coding	15	c.1277+497G>A
chrA1	5352536	C	T	PASS	intron_variant	MODIFIER	ATP8A2	ATP8A2	transcript	XM_045043082.1	protein_coding	17	c.1592-389C>T
chrA1	5352536	C	T	PASS	intron_variant	MODIFIER	ATP8A2	ATP8A2	transcript	XM_006927173.5	protein_coding	17	c.1460-389C>T
chrA1	5352536	C	T	PASS	intron_variant	MODIFIER	ATP8A2	ATP8A2	transcript	XM_023250034.2	protein_coding	17	c.1580-389C>T
chrA1	5352536	C	T	PASS	intron_variant	MODIFIER	ATP8A2	ATP8A2	transcript	XM_019820599.3	protein_coding	17	c.1544-389C>T
chrA1	5352536	C	T	PASS	intron_variant	MODIFIER	ATP8A2	ATP8A2	transcript	XM_045043371.1	protein_coding	17	c.1592-389C>T
chrA1	5352536	C	T	PASS	intron_variant	MODIFIER	ATP8A2	ATP8A2	transcript	XM_045043107.1	protein_coding	17	c.1592-389C>T
chrA1	5352536	C	T	PASS	intron_variant	MODIFIER	ATP8A2	ATP8A2	transcript	XM_045043172.1	protein_coding	17	c.1592-389C>T
chrA1	5352536	C	T	PASS	intron_variant	MODIFIER	ATP8A2	ATP8A2	transcript	XM_045043129.1	protein_coding	17	c.1592-389C>T
chrA1	5352536	C	T	PASS	intron_variant	MODIFIER	ATP8A2	ATP8A2	transcript	XR_006588849.1	pseudogene	17	n.1637-389C>T
chrA1	5352536	C	T	PASS	intron_variant	MODIFIER	ATP8A2	ATP8A2	transcript	XM_045043251.1	protein_coding	17	c.1508-389C>T
chrA1	5352536	C	T	PASS	intron_variant	MODIFIER	ATP8A2	ATP8A2	transcript	XM_045043308.1	protein_coding	17	c.1460-389C>T
chrA1	5352536	C	T	PASS	intron_variant	MODIFIER	ATP8A2	ATP8A2	transcript	XM_019820968.3	protein_coding	17	c.1460-389C>T
chrA1	5353938	G	A	PASS	intron_variant	MODIFIER	ATP8A2	ATP8A2	transcript	XM_045043082.1	protein_coding	18	c.1674+931G>A
chrA1	5353938	G	A	PASS	intron_variant	MODIFIER	ATP8A2	ATP8A2	transcript	XM_006927173.5	protein_coding	18	c.1542+931G>A
chrA1	5353938	G	A	PASS	intron_variant	MODIFIER	ATP8A2	ATP8A2	transcript	XM_023250034.2	protein_coding	18	c.1662+931G>A
chrA1	5353938	G	A	PASS	intron_variant	MODIFIER	ATP8A2	ATP8A2	transcript	XM_019820599.3	protein_coding	18	c.1626+931G>A
chrA1	5353938	G	A	PASS	intron_variant	MODIFIER	ATP8A2	ATP8A2	transcript	XM_045043371.1	protein_coding	18	c.1674+931G>A
chrA1	5353938	G	A	PASS	intron_variant	MODIFIER	ATP8A2	ATP8A2	transcript	XM_045043107.1	protein_coding	18	c.1674+931G>A
chrA1	5353938	G	A	PASS	intron_variant	MODIFIER	ATP8A2	ATP8A2	transcript	XM_045043172.1	protein_coding	18	c.1674+931G>A
chrA1	5353938	G	A	PASS	intron_variant	MODIFIER	ATP8A2	ATP8A2	transcript	XM_045043129.1	protein_coding	18	c.1674+931G>A
chrA1	5353938	G	A	PASS	intron_variant	MODIFIER	ATP8A2	ATP8A2	transcript	XR_006588849.1	pseudogene	18	n.1719+931G>A
chrA1	5353938	G	A	PASS	intron_variant	MODIFIER	ATP8A2	ATP8A2	transcript	XM_045043251.1	protein_coding	18	c.1590+931G>A
chrA1	5353938	G	A	PASS	intron_variant	MODIFIER	ATP8A2	ATP8A2	transcript	XM_045043308.1	protein_coding	18	c.1542+931G>A
chrA1	5353938	G	A	PASS	intron_variant	MODIFIER	ATP8A2	ATP8A2	transcript	XM_019820968.3	protein_coding	18	c.1542+931G>A
chrA1	5354255	GGACT	G	PASS	intron_variant	MODIFIER	ATP8A2	ATP8A2	transcript	XM_045043082.1	protein_coding	18	c.1674+1249_1674+1252delGACT
chrA1	5354255	GGACT	G	PASS	intron_variant	MODIFIER	ATP8A2	ATP8A2	transcript	XM_006927173.5	protein_coding	18	c.1542+1249_1542+1252delGACT
chrA1	5354255	GGACT	G	PASS	intron_variant	MODIFIER	ATP8A2	ATP8A2	transcript	XM_023250034.2	protein_coding	18	c.1662+1249_1662+1252delGACT
chrA1	5354255	GGACT	G	PASS	intron_variant	MODIFIER	ATP8A2	ATP8A2	transcript	XM_019820599.3	protein_coding	18	c.1626+1249_1626+1252delGACT
chrA1	5354255	GGACT	G	PASS	intron_variant	MODIFIER	ATP8A2	ATP8A2	transcript	XM_045043371.1	protein_coding	18	c.1674+1249_1674+1252delGACT
chrA1	5354255	GGACT	G	PASS	intron_variant	MODIFIER	ATP8A2	ATP8A2	transcript	XM_045043107.1	protein_coding	18	c.1674+1249_1674+1252delGACT
chrA1	5354255	GGACT	G	PASS	intron_variant	MODIFIER	ATP8A2	ATP8A2	transcript	XM_045043172.1	protein_coding	18	c.1674+1249_1674+1252delGACT
chrA1	5354255	GGACT	G	PASS	intron_variant	MODIFIER	ATP8A2	ATP8A2	transcript	XM_045043129.1	protein_coding	18	c.1674+1249_1674+1252delGACT
chrA1	5354255	GGACT	G	PASS	intron_variant	MODIFIER	ATP8A2	ATP8A2	transcript	XR_006588849.1	pseudogene	18	n.1719+1249_1719+1252delGACT
chrA1	5354255	GGACT	G	PASS	intron_variant	MODIFIER	ATP8A2	ATP8A2	transcript	XM_045043251.1	protein_coding	18	c.1590+1249_1590+1252delGACT
chrA1	5354255	GGACT	G	PASS	intron_variant	MODIFIER	ATP8A2	ATP8A2	transcript	XM_045043308.1	protein_coding	18	c.1542+1249_1542+1252delGACT
chrA1	5354255	GGACT	G	PASS	intron_variant	MODIFIER	ATP8A2	ATP8A2	transcript	XM_019820968.3	protein_coding	18	c.1542+1249_1542+1252delGACT
chrA1	5354658	C	T	PASS	intron_variant	MODIFIER	ATP8A2	ATP8A2	transcript	XM_045043082.1	protein_coding	18	c.1675-1138C>T
chrA1	5354658	C	T	PASS	intron_variant	MODIFIER	ATP8A2	ATP8A2	transcript	XM_006927173.5	protein_coding	18	c.1543-1138C>T
chrA1	5354658	C	T	PASS	intron_variant	MODIFIER	ATP8A2	ATP8A2	transcript	XM_023250034.2	protein_coding	18	c.1663-1138C>T
chrA1	5354658	C	T	PASS	intron_variant	MODIFIER	ATP8A2	ATP8A2	transcript	XM_019820599.3	protein_coding	18	c.1627-1138C>T
chrA1	5354658	C	T	PASS	intron_variant	MODIFIER	ATP8A2	ATP8A2	transcript	XM_045043371.1	protein_coding	18	c.1675-1138C>T
chrA1	5354658	C	T	PASS	intron_variant	MODIFIER	ATP8A2	ATP8A2	transcript	XM_045043107.1	protein_coding	18	c.1675-1138C>T
chrA1	5354658	C	T	PASS	intron_variant	MODIFIER	ATP8A2	ATP8A2	transcript	XM_045043172.1	protein_coding	18	c.1675-1138C>T
chrA1	5354658	C	T	PASS	intron_variant	MODIFIER	ATP8A2	ATP8A2	transcript	XM_045043129.1	protein_coding	18	c.1675-1138C>T
chrA1	5354658	C	T	PASS	intron_variant	MODIFIER	ATP8A2	ATP8A2	transcript	XR_006588849.1	pseudogene	18	n.1720-1138C>T
chrA1	5354658	C	T	PASS	intron_variant	MODIFIER	ATP8A2	ATP8A2	transcript	XM_045043251.1	protein_coding	18	c.1591-1138C>T
chrA1	5354658	C	T	PASS	intron_variant	MODIFIER	ATP8A2	ATP8A2	transcript	XM_045043308.1	protein_coding	18	c.1543-1138C>T
chrA1	5354658	C	T	PASS	intron_variant	MODIFIER	ATP8A2	ATP8A2	transcript	XM_019820968.3	protein_coding	18	c.1543-1138C>T
chrA1	5356039	TGC	T	PASS	intron_variant	MODIFIER	ATP8A2	ATP8A2	transcript	XM_045043082.1	protein_coding	19	c.1724+195_1724+196delGC
chrA1	5356039	TGC	T	PASS	intron_variant	MODIFIER	ATP8A2	ATP8A2	transcript	XM_006927173.5	protein_coding	19	c.1592+195_1592+196delGC
chrA1	5356039	TGC	T	PASS	intron_variant	MODIFIER	ATP8A2	ATP8A2	transcript	XM_023250034.2	protein_coding	19	c.1712+195_1712+196delGC
chrA1	5356039	TGC	T	PASS	intron_variant	MODIFIER	ATP8A2	ATP8A2	transcript	XM_019820599.3	protein_coding	19	c.1676+195_1676+196delGC
chrA1	5356039	TGC	T	PASS	intron_variant	MODIFIER	ATP8A2	ATP8A2	transcript	XM_045043371.1	protein_coding	19	c.1724+195_1724+196delGC
chrA1	5356039	TGC	T	PASS	intron_variant	MODIFIER	ATP8A2	ATP8A2	transcript	XM_045043107.1	protein_coding	19	c.1724+195_1724+196delGC
chrA1	5356039	TGC	T	PASS	intron_variant	MODIFIER	ATP8A2	ATP8A2	transcript	XM_045043172.1	protein_coding	19	c.1724+195_1724+196delGC
chrA1	5356039	TGC	T	PASS	intron_variant	MODIFIER	ATP8A2	ATP8A2	transcript	XM_045043129.1	protein_coding	19	c.1724+195_1724+196delGC
chrA1	5356039	TGC	T	PASS	intron_variant	MODIFIER	ATP8A2	ATP8A2	transcript	XR_006588849.1	pseudogene	19	n.1769+195_1769+196delGC
chrA1	5356039	TGC	T	PASS	intron_variant	MODIFIER	ATP8A2	ATP8A2	transcript	XM_045043251.1	protein_coding	19	c.1640+195_1640+196delGC
chrA1	5356039	TGC	T	PASS	intron_variant	MODIFIER	ATP8A2	ATP8A2	transcript	XM_045043308.1	protein_coding	19	c.1592+195_1592+196delGC
chrA1	5356039	TGC	T	PASS	intron_variant	MODIFIER	ATP8A2	ATP8A2	transcript	XM_019820968.3	protein_coding	19	c.1592+195_1592+196delGC
chrA1	5356049	C	T	PASS	intron_variant	MODIFIER	ATP8A2	ATP8A2	transcript	XM_045043082.1	protein_coding	19	c.1724+204C>T
chrA1	5356049	C	T	PASS	intron_variant	MODIFIER	ATP8A2	ATP8A2	transcript	XM_006927173.5	protein_coding	19	c.1592+204C>T
chrA1	5356049	C	T	PASS	intron_variant	MODIFIER	ATP8A2	ATP8A2	transcript	XM_023250034.2	protein_coding	19	c.1712+204C>T
chrA1	5356049	C	T	PASS	intron_variant	MODIFIER	ATP8A2	ATP8A2	transcript	XM_019820599.3	protein_coding	19	c.1676+204C>T
chrA1	5356049	C	T	PASS	intron_variant	MODIFIER	ATP8A2	ATP8A2	transcript	XM_045043371.1	protein_coding	19	c.1724+204C>T
chrA1	5356049	C	T	PASS	intron_variant	MODIFIER	ATP8A2	ATP8A2	transcript	XM_045043107.1	protein_coding	19	c.1724+204C>T
chrA1	5356049	C	T	PASS	intron_variant	MODIFIER	ATP8A2	ATP8A2	transcript	XM_045043172.1	protein_coding	19	c.1724+204C>T
chrA1	5356049	C	T	PASS	intron_variant	MODIFIER	ATP8A2	ATP8A2	transcript	XM_045043129.1	protein_coding	19	c.1724+204C>T
chrA1	5356049	C	T	PASS	intron_variant	MODIFIER	ATP8A2	ATP8A2	transcript	XR_006588849.1	pseudogene	19	n.1769+204C>T
chrA1	5356049	C	T	PASS	intron_variant	MODIFIER	ATP8A2	ATP8A2	transcript	XM_045043251.1	protein_coding	19	c.1640+204C>T
chrA1	5356049	C	T	PASS	intron_variant	MODIFIER	ATP8A2	ATP8A2	transcript	XM_045043308.1	protein_coding	19	c.1592+204C>T
chrA1	5356049	C	T	PASS	intron_variant	MODIFIER	ATP8A2	ATP8A2	transcript	XM_019820968.3	protein_coding	19	c.1592+204C>T
chrA1	5356330	C	T	PASS	intron_variant	MODIFIER	ATP8A2	ATP8A2	transcript	XM_045043082.1	protein_coding	19	c.1724+485C>T
chrA1	5356330	C	T	PASS	intron_variant	MODIFIER	ATP8A2	ATP8A2	transcript	XM_006927173.5	protein_coding	19	c.1592+485C>T
chrA1	5356330	C	T	PASS	intron_variant	MODIFIER	ATP8A2	ATP8A2	transcript	XM_023250034.2	protein_coding	19	c.1712+485C>T
chrA1	5356330	C	T	PASS	intron_variant	MODIFIER	ATP8A2	ATP8A2	transcript	XM_019820599.3	protein_coding	19	c.1676+485C>T
chrA1	5356330	C	T	PASS	intron_variant	MODIFIER	ATP8A2	ATP8A2	transcript	XM_045043371.1	protein_coding	19	c.1724+485C>T
chrA1	5356330	C	T	PASS	intron_variant	MODIFIER	ATP8A2	ATP8A2	transcript	XM_045043107.1	protein_coding	19	c.1724+485C>T
chrA1	5356330	C	T	PASS	intron_variant	MODIFIER	ATP8A2	ATP8A2	transcript	XM_045043172.1	protein_coding	19	c.1724+485C>T
chrA1	5356330	C	T	PASS	intron_variant	MODIFIER	ATP8A2	ATP8A2	transcript	XM_045043129.1	protein_coding	19	c.1724+485C>T
chrA1	5356330	C	T	PASS	intron_variant	MODIFIER	ATP8A2	ATP8A2	transcript	XR_006588849.1	pseudogene	19	n.1769+485C>T
chrA1	5356330	C	T	PASS	intron_variant	MODIFIER	ATP8A2	ATP8A2	transcript	XM_045043251.1	protein_coding	19	c.1640+485C>T
chrA1	5356330	C	T	PASS	intron_variant	MODIFIER	ATP8A2	ATP8A2	transcript	XM_045043308.1	protein_coding	19	c.1592+485C>T
chrA1	5356330	C	T	PASS	intron_variant	MODIFIER	ATP8A2	ATP8A2	transcript	XM_019820968.3	protein_coding	19	c.1592+485C>T
chrA1	5356458	C	T	PASS	intron_variant	MODIFIER	ATP8A2	ATP8A2	transcript	XM_045043082.1	protein_coding	19	c.1724+613C>T
chrA1	5356458	C	T	PASS	intron_variant	MODIFIER	ATP8A2	ATP8A2	transcript	XM_006927173.5	protein_coding	19	c.1592+613C>T
chrA1	5356458	C	T	PASS	intron_variant	MODIFIER	ATP8A2	ATP8A2	transcript	XM_023250034.2	protein_coding	19	c.1712+613C>T
chrA1	5356458	C	T	PASS	intron_variant	MODIFIER	ATP8A2	ATP8A2	transcript	XM_019820599.3	protein_coding	19	c.1676+613C>T
chrA1	5356458	C	T	PASS	intron_variant	MODIFIER	ATP8A2	ATP8A2	transcript	XM_045043371.1	protein_coding	19	c.1724+613C>T
chrA1	5356458	C	T	PASS	intron_variant	MODIFIER	ATP8A2	ATP8A2	transcript	XM_045043107.1	protein_coding	19	c.1724+613C>T
chrA1	5356458	C	T	PASS	intron_variant	MODIFIER	ATP8A2	ATP8A2	transcript	XM_045043172.1	protein_coding	19	c.1724+613C>T
chrA1	5356458	C	T	PASS	intron_variant	MODIFIER	ATP8A2	ATP8A2	transcript	XM_045043129.1	protein_coding	19	c.1724+613C>T
chrA1	5356458	C	T	PASS	intron_variant	MODIFIER	ATP8A2	ATP8A2	transcript	XR_006588849.1	pseudogene	19	n.1769+613C>T
chrA1	5356458	C	T	PASS	intron_variant	MODIFIER	ATP8A2	ATP8A2	transcript	XM_045043251.1	protein_coding	19	c.1640+613C>T
chrA1	5356458	C	T	PASS	intron_variant	MODIFIER	ATP8A2	ATP8A2	transcript	XM_045043308.1	protein_coding	19	c.1592+613C>T
chrA1	5356458	C	T	PASS	intron_variant	MODIFIER	ATP8A2	ATP8A2	transcript	XM_019820968.3	protein_coding	19	c.1592+613C>T
chrA1	5356528	A	G	PASS	intron_variant	MODIFIER	ATP8A2	ATP8A2	transcript	XM_045043082.1	protein_coding	19	c.1724+683A>G
chrA1	5356528	A	G	PASS	intron_variant	MODIFIER	ATP8A2	ATP8A2	transcript	XM_006927173.5	protein_coding	19	c.1592+683A>G
chrA1	5356528	A	G	PASS	intron_variant	MODIFIER	ATP8A2	ATP8A2	transcript	XM_023250034.2	protein_coding	19	c.1712+683A>G
chrA1	5356528	A	G	PASS	intron_variant	MODIFIER	ATP8A2	ATP8A2	transcript	XM_019820599.3	protein_coding	19	c.1676+683A>G
chrA1	5356528	A	G	PASS	intron_variant	MODIFIER	ATP8A2	ATP8A2	transcript	XM_045043371.1	protein_coding	19	c.1724+683A>G
chrA1	5356528	A	G	PASS	intron_variant	MODIFIER	ATP8A2	ATP8A2	transcript	XM_045043107.1	protein_coding	19	c.1724+683A>G
chrA1	5356528	A	G	PASS	intron_variant	MODIFIER	ATP8A2	ATP8A2	transcript	XM_045043172.1	protein_coding	19	c.1724+683A>G
chrA1	5356528	A	G	PASS	intron_variant	MODIFIER	ATP8A2	ATP8A2	transcript	XM_045043129.1	protein_coding	19	c.1724+683A>G
chrA1	5356528	A	G	PASS	intron_variant	MODIFIER	ATP8A2	ATP8A2	transcript	XR_006588849.1	pseudogene	19	n.1769+683A>G
chrA1	5356528	A	G	PASS	intron_variant	MODIFIER	ATP8A2	ATP8A2	transcript	XM_045043251.1	protein_coding	19	c.1640+683A>G
chrA1	5356528	A	G	PASS	intron_variant	MODIFIER	ATP8A2	ATP8A2	transcript	XM_045043308.1	protein_coding	19	c.1592+683A>G
chrA1	5356528	A	G	PASS	intron_variant	MODIFIER	ATP8A2	ATP8A2	transcript	XM_019820968.3	protein_coding	19	c.1592+683A>G
chrA1	5357240	T	G	PASS	intron_variant	MODIFIER	ATP8A2	ATP8A2	transcript	XM_045043082.1	protein_coding	19	c.1725-1084T>G
chrA1	5357240	T	G	PASS	intron_variant	MODIFIER	ATP8A2	ATP8A2	transcript	XM_006927173.5	protein_coding	19	c.1593-1084T>G
chrA1	5357240	T	G	PASS	intron_variant	MODIFIER	ATP8A2	ATP8A2	transcript	XM_023250034.2	protein_coding	19	c.1713-1084T>G
chrA1	5357240	T	G	PASS	intron_variant	MODIFIER	ATP8A2	ATP8A2	transcript	XM_019820599.3	protein_coding	19	c.1677-1084T>G
chrA1	5357240	T	G	PASS	intron_variant	MODIFIER	ATP8A2	ATP8A2	transcript	XM_045043371.1	protein_coding	19	c.1725-1084T>G
chrA1	5357240	T	G	PASS	intron_variant	MODIFIER	ATP8A2	ATP8A2	transcript	XM_045043107.1	protein_coding	19	c.1725-1084T>G
chrA1	5357240	T	G	PASS	intron_variant	MODIFIER	ATP8A2	ATP8A2	transcript	XM_045043172.1	protein_coding	19	c.1725-1084T>G
chrA1	5357240	T	G	PASS	intron_variant	MODIFIER	ATP8A2	ATP8A2	transcript	XM_045043129.1	protein_coding	19	c.1725-1084T>G
chrA1	5357240	T	G	PASS	intron_variant	MODIFIER	ATP8A2	ATP8A2	transcript	XR_006588849.1	pseudogene	19	n.1770-1084T>G
chrA1	5357240	T	G	PASS	intron_variant	MODIFIER	ATP8A2	ATP8A2	transcript	XM_045043251.1	protein_coding	19	c.1641-1084T>G
chrA1	5357240	T	G	PASS	intron_variant	MODIFIER	ATP8A2	ATP8A2	transcript	XM_045043308.1	protein_coding	19	c.1593-1084T>G
chrA1	5357240	T	G	PASS	intron_variant	MODIFIER	ATP8A2	ATP8A2	transcript	XM_019820968.3	protein_coding	19	c.1593-1084T>G
chrA1	5359118	A	G	PASS	intron_variant	MODIFIER	ATP8A2	ATP8A2	transcript	XM_045043082.1	protein_coding	20	c.1795-183A>G
chrA1	5359118	A	G	PASS	intron_variant	MODIFIER	ATP8A2	ATP8A2	transcript	XM_006927173.5	protein_coding	20	c.1663-183A>G
chrA1	5359118	A	G	PASS	intron_variant	MODIFIER	ATP8A2	ATP8A2	transcript	XM_023250034.2	protein_coding	20	c.1783-183A>G
chrA1	5359118	A	G	PASS	intron_variant	MODIFIER	ATP8A2	ATP8A2	transcript	XM_019820599.3	protein_coding	20	c.1747-183A>G
chrA1	5359118	A	G	PASS	intron_variant	MODIFIER	ATP8A2	ATP8A2	transcript	XM_045043371.1	protein_coding	20	c.1795-183A>G
chrA1	5359118	A	G	PASS	intron_variant	MODIFIER	ATP8A2	ATP8A2	transcript	XM_045043107.1	protein_coding	20	c.1795-183A>G
chrA1	5359118	A	G	PASS	intron_variant	MODIFIER	ATP8A2	ATP8A2	transcript	XM_045043172.1	protein_coding	20	c.1795-183A>G
chrA1	5359118	A	G	PASS	intron_variant	MODIFIER	ATP8A2	ATP8A2	transcript	XM_045043129.1	protein_coding	20	c.1795-183A>G
chrA1	5359118	A	G	PASS	intron_variant	MODIFIER	ATP8A2	ATP8A2	transcript	XR_006588849.1	pseudogene	20	n.1840-183A>G
chrA1	5359118	A	G	PASS	intron_variant	MODIFIER	ATP8A2	ATP8A2	transcript	XM_045043251.1	protein_coding	20	c.1711-183A>G
chrA1	5359118	A	G	PASS	intron_variant	MODIFIER	ATP8A2	ATP8A2	transcript	XM_045043308.1	protein_coding	20	c.1663-183A>G
chrA1	5359118	A	G	PASS	intron_variant	MODIFIER	ATP8A2	ATP8A2	transcript	XM_019820968.3	protein_coding	20	c.1663-183A>G
chrA1	5360177	C	T	PASS	intron_variant	MODIFIER	ATP8A2	ATP8A2	transcript	XM_045043082.1	protein_coding	21	c.1880-192C>T
chrA1	5360177	C	T	PASS	intron_variant	MODIFIER	ATP8A2	ATP8A2	transcript	XM_006927173.5	protein_coding	21	c.1748-192C>T
chrA1	5360177	C	T	PASS	intron_variant	MODIFIER	ATP8A2	ATP8A2	transcript	XM_023250034.2	protein_coding	21	c.1868-192C>T
chrA1	5360177	C	T	PASS	intron_variant	MODIFIER	ATP8A2	ATP8A2	transcript	XM_019820599.3	protein_coding	21	c.1832-192C>T
chrA1	5360177	C	T	PASS	intron_variant	MODIFIER	ATP8A2	ATP8A2	transcript	XM_045043371.1	protein_coding	21	c.1880-192C>T
chrA1	5360177	C	T	PASS	intron_variant	MODIFIER	ATP8A2	ATP8A2	transcript	XM_045043107.1	protein_coding	21	c.1880-192C>T
chrA1	5360177	C	T	PASS	intron_variant	MODIFIER	ATP8A2	ATP8A2	transcript	XM_045043172.1	protein_coding	21	c.1880-192C>T
chrA1	5360177	C	T	PASS	intron_variant	MODIFIER	ATP8A2	ATP8A2	transcript	XM_045043129.1	protein_coding	21	c.1880-192C>T
chrA1	5360177	C	T	PASS	intron_variant	MODIFIER	ATP8A2	ATP8A2	transcript	XR_006588849.1	pseudogene	21	n.1925-192C>T
chrA1	5360177	C	T	PASS	intron_variant	MODIFIER	ATP8A2	ATP8A2	transcript	XM_045043251.1	protein_coding	21	c.1796-192C>T
chrA1	5360177	C	T	PASS	intron_variant	MODIFIER	ATP8A2	ATP8A2	transcript	XM_045043308.1	protein_coding	21	c.1748-192C>T
chrA1	5360177	C	T	PASS	intron_variant	MODIFIER	ATP8A2	ATP8A2	transcript	XM_019820968.3	protein_coding	21	c.1748-192C>T
chrA1	5360900	T	C	PASS	intron_variant	MODIFIER	ATP8A2	ATP8A2	transcript	XM_045043082.1	protein_coding	22	c.2019+392T>C
chrA1	5360900	T	C	PASS	intron_variant	MODIFIER	ATP8A2	ATP8A2	transcript	XM_006927173.5	protein_coding	22	c.1887+392T>C
chrA1	5360900	T	C	PASS	intron_variant	MODIFIER	ATP8A2	ATP8A2	transcript	XM_023250034.2	protein_coding	22	c.2007+392T>C
chrA1	5360900	T	C	PASS	intron_variant	MODIFIER	ATP8A2	ATP8A2	transcript	XM_019820599.3	protein_coding	22	c.1971+392T>C
chrA1	5360900	T	C	PASS	intron_variant	MODIFIER	ATP8A2	ATP8A2	transcript	XM_045043371.1	protein_coding	22	c.2019+392T>C
chrA1	5360900	T	C	PASS	intron_variant	MODIFIER	ATP8A2	ATP8A2	transcript	XM_045043107.1	protein_coding	22	c.2019+392T>C
chrA1	5360900	T	C	PASS	intron_variant	MODIFIER	ATP8A2	ATP8A2	transcript	XM_045043172.1	protein_coding	22	c.2019+392T>C
chrA1	5360900	T	C	PASS	intron_variant	MODIFIER	ATP8A2	ATP8A2	transcript	XM_045043129.1	protein_coding	22	c.2019+392T>C
chrA1	5360900	T	C	PASS	intron_variant	MODIFIER	ATP8A2	ATP8A2	transcript	XR_006588849.1	pseudogene	22	n.2064+392T>C
chrA1	5360900	T	C	PASS	intron_variant	MODIFIER	ATP8A2	ATP8A2	transcript	XM_045043251.1	protein_coding	22	c.1935+392T>C
chrA1	5360900	T	C	PASS	intron_variant	MODIFIER	ATP8A2	ATP8A2	transcript	XM_045043308.1	protein_coding	22	c.1887+392T>C
chrA1	5360900	T	C	PASS	intron_variant	MODIFIER	ATP8A2	ATP8A2	transcript	XM_019820968.3	protein_coding	22	c.1887+392T>C
chrA1	5361514	T	C	PASS	intron_variant	MODIFIER	ATP8A2	ATP8A2	transcript	XM_045043082.1	protein_coding	22	c.2019+1006T>C
chrA1	5361514	T	C	PASS	intron_variant	MODIFIER	ATP8A2	ATP8A2	transcript	XM_006927173.5	protein_coding	22	c.1887+1006T>C
chrA1	5361514	T	C	PASS	intron_variant	MODIFIER	ATP8A2	ATP8A2	transcript	XM_023250034.2	protein_coding	22	c.2007+1006T>C
chrA1	5361514	T	C	PASS	intron_variant	MODIFIER	ATP8A2	ATP8A2	transcript	XM_019820599.3	protein_coding	22	c.1971+1006T>C
chrA1	5361514	T	C	PASS	intron_variant	MODIFIER	ATP8A2	ATP8A2	transcript	XM_045043371.1	protein_coding	22	c.2019+1006T>C
chrA1	5361514	T	C	PASS	intron_variant	MODIFIER	ATP8A2	ATP8A2	transcript	XM_045043107.1	protein_coding	22	c.2019+1006T>C
chrA1	5361514	T	C	PASS	intron_variant	MODIFIER	ATP8A2	ATP8A2	transcript	XM_045043172.1	protein_coding	22	c.2019+1006T>C
chrA1	5361514	T	C	PASS	intron_variant	MODIFIER	ATP8A2	ATP8A2	transcript	XM_045043129.1	protein_coding	22	c.2019+1006T>C
chrA1	5361514	T	C	PASS	intron_variant	MODIFIER	ATP8A2	ATP8A2	transcript	XR_006588849.1	pseudogene	22	n.2064+1006T>C
chrA1	5361514	T	C	PASS	intron_variant	MODIFIER	ATP8A2	ATP8A2	transcript	XM_045043251.1	protein_coding	22	c.1935+1006T>C
chrA1	5361514	T	C	PASS	intron_variant	MODIFIER	ATP8A2	ATP8A2	transcript	XM_045043308.1	protein_coding	22	c.1887+1006T>C
chrA1	5361514	T	C	PASS	intron_variant	MODIFIER	ATP8A2	ATP8A2	transcript	XM_019820968.3	protein_coding	22	c.1887+1006T>C
chrA1	5361568	G	A	PASS	intron_variant	MODIFIER	ATP8A2	ATP8A2	transcript	XM_045043082.1	protein_coding	22	c.2019+1060G>A
chrA1	5361568	G	A	PASS	intron_variant	MODIFIER	ATP8A2	ATP8A2	transcript	XM_006927173.5	protein_coding	22	c.1887+1060G>A
chrA1	5361568	G	A	PASS	intron_variant	MODIFIER	ATP8A2	ATP8A2	transcript	XM_023250034.2	protein_coding	22	c.2007+1060G>A
chrA1	5361568	G	A	PASS	intron_variant	MODIFIER	ATP8A2	ATP8A2	transcript	XM_019820599.3	protein_coding	22	c.1971+1060G>A
chrA1	5361568	G	A	PASS	intron_variant	MODIFIER	ATP8A2	ATP8A2	transcript	XM_045043371.1	protein_coding	22	c.2019+1060G>A
chrA1	5361568	G	A	PASS	intron_variant	MODIFIER	ATP8A2	ATP8A2	transcript	XM_045043107.1	protein_coding	22	c.2019+1060G>A
chrA1	5361568	G	A	PASS	intron_variant	MODIFIER	ATP8A2	ATP8A2	transcript	XM_045043172.1	protein_coding	22	c.2019+1060G>A
chrA1	5361568	G	A	PASS	intron_variant	MODIFIER	ATP8A2	ATP8A2	transcript	XM_045043129.1	protein_coding	22	c.2019+1060G>A
chrA1	5361568	G	A	PASS	intron_variant	MODIFIER	ATP8A2	ATP8A2	transcript	XR_006588849.1	pseudogene	22	n.2064+1060G>A
chrA1	5361568	G	A	PASS	intron_variant	MODIFIER	ATP8A2	ATP8A2	transcript	XM_045043251.1	protein_coding	22	c.1935+1060G>A
chrA1	5361568	G	A	PASS	intron_variant	MODIFIER	ATP8A2	ATP8A2	transcript	XM_045043308.1	protein_coding	22	c.1887+1060G>A
chrA1	5361568	G	A	PASS	intron_variant	MODIFIER	ATP8A2	ATP8A2	transcript	XM_019820968.3	protein_coding	22	c.1887+1060G>A
chrA1	5362382	G	A	PASS	intron_variant	MODIFIER	ATP8A2	ATP8A2	transcript	XM_045043082.1	protein_coding	22	c.2020-461G>A
chrA1	5362382	G	A	PASS	intron_variant	MODIFIER	ATP8A2	ATP8A2	transcript	XM_006927173.5	protein_coding	22	c.1888-461G>A
chrA1	5362382	G	A	PASS	intron_variant	MODIFIER	ATP8A2	ATP8A2	transcript	XM_023250034.2	protein_coding	22	c.2008-461G>A
chrA1	5362382	G	A	PASS	intron_variant	MODIFIER	ATP8A2	ATP8A2	transcript	XM_019820599.3	protein_coding	22	c.1972-461G>A
chrA1	5362382	G	A	PASS	intron_variant	MODIFIER	ATP8A2	ATP8A2	transcript	XM_045043371.1	protein_coding	22	c.2020-461G>A
chrA1	5362382	G	A	PASS	intron_variant	MODIFIER	ATP8A2	ATP8A2	transcript	XM_045043107.1	protein_coding	22	c.2020-461G>A
chrA1	5362382	G	A	PASS	intron_variant	MODIFIER	ATP8A2	ATP8A2	transcript	XM_045043172.1	protein_coding	22	c.2020-461G>A
chrA1	5362382	G	A	PASS	intron_variant	MODIFIER	ATP8A2	ATP8A2	transcript	XM_045043129.1	protein_coding	22	c.2020-461G>A
chrA1	5362382	G	A	PASS	intron_variant	MODIFIER	ATP8A2	ATP8A2	transcript	XR_006588849.1	pseudogene	22	n.2065-461G>A
chrA1	5362382	G	A	PASS	intron_variant	MODIFIER	ATP8A2	ATP8A2	transcript	XM_045043251.1	protein_coding	22	c.1936-461G>A
chrA1	5362382	G	A	PASS	intron_variant	MODIFIER	ATP8A2	ATP8A2	transcript	XM_045043308.1	protein_coding	22	c.1888-461G>A
chrA1	5362382	G	A	PASS	intron_variant	MODIFIER	ATP8A2	ATP8A2	transcript	XM_019820968.3	protein_coding	22	c.1888-461G>A
chrA1	5362645	A	C	PASS	intron_variant	MODIFIER	ATP8A2	ATP8A2	transcript	XM_045043082.1	protein_coding	22	c.2020-198A>C
chrA1	5362645	A	C	PASS	intron_variant	MODIFIER	ATP8A2	ATP8A2	transcript	XM_006927173.5	protein_coding	22	c.1888-198A>C
chrA1	5362645	A	C	PASS	intron_variant	MODIFIER	ATP8A2	ATP8A2	transcript	XM_023250034.2	protein_coding	22	c.2008-198A>C
chrA1	5362645	A	C	PASS	intron_variant	MODIFIER	ATP8A2	ATP8A2	transcript	XM_019820599.3	protein_coding	22	c.1972-198A>C
chrA1	5362645	A	C	PASS	intron_variant	MODIFIER	ATP8A2	ATP8A2	transcript	XM_045043371.1	protein_coding	22	c.2020-198A>C
chrA1	5362645	A	C	PASS	intron_variant	MODIFIER	ATP8A2	ATP8A2	transcript	XM_045043107.1	protein_coding	22	c.2020-198A>C
chrA1	5362645	A	C	PASS	intron_variant	MODIFIER	ATP8A2	ATP8A2	transcript	XM_045043172.1	protein_coding	22	c.2020-198A>C
chrA1	5362645	A	C	PASS	intron_variant	MODIFIER	ATP8A2	ATP8A2	transcript	XM_045043129.1	protein_coding	22	c.2020-198A>C
chrA1	5362645	A	C	PASS	intron_variant	MODIFIER	ATP8A2	ATP8A2	transcript	XR_006588849.1	pseudogene	22	n.2065-198A>C
chrA1	5362645	A	C	PASS	intron_variant	MODIFIER	ATP8A2	ATP8A2	transcript	XM_045043251.1	protein_coding	22	c.1936-198A>C
chrA1	5362645	A	C	PASS	intron_variant	MODIFIER	ATP8A2	ATP8A2	transcript	XM_045043308.1	protein_coding	22	c.1888-198A>C
chrA1	5362645	A	C	PASS	intron_variant	MODIFIER	ATP8A2	ATP8A2	transcript	XM_019820968.3	protein_coding	22	c.1888-198A>C
chrA1	5363086	G	A	PASS	intron_variant	MODIFIER	ATP8A2	ATP8A2	transcript	XM_045043082.1	protein_coding	23	c.2158+105G>A
chrA1	5363086	G	A	PASS	intron_variant	MODIFIER	ATP8A2	ATP8A2	transcript	XM_006927173.5	protein_coding	23	c.2026+105G>A
chrA1	5363086	G	A	PASS	intron_variant	MODIFIER	ATP8A2	ATP8A2	transcript	XM_023250034.2	protein_coding	23	c.2146+105G>A
chrA1	5363086	G	A	PASS	intron_variant	MODIFIER	ATP8A2	ATP8A2	transcript	XM_019820599.3	protein_coding	23	c.2110+105G>A
chrA1	5363086	G	A	PASS	intron_variant	MODIFIER	ATP8A2	ATP8A2	transcript	XM_045043371.1	protein_coding	23	c.2158+105G>A
chrA1	5363086	G	A	PASS	intron_variant	MODIFIER	ATP8A2	ATP8A2	transcript	XM_045043107.1	protein_coding	23	c.2158+105G>A
chrA1	5363086	G	A	PASS	intron_variant	MODIFIER	ATP8A2	ATP8A2	transcript	XM_045043172.1	protein_coding	23	c.2158+105G>A
chrA1	5363086	G	A	PASS	intron_variant	MODIFIER	ATP8A2	ATP8A2	transcript	XM_045043129.1	protein_coding	23	c.2158+105G>A
chrA1	5363086	G	A	PASS	intron_variant	MODIFIER	ATP8A2	ATP8A2	transcript	XR_006588849.1	pseudogene	23	n.2203+105G>A
chrA1	5363086	G	A	PASS	intron_variant	MODIFIER	ATP8A2	ATP8A2	transcript	XM_045043251.1	protein_coding	23	c.2074+105G>A
chrA1	5363086	G	A	PASS	intron_variant	MODIFIER	ATP8A2	ATP8A2	transcript	XM_045043308.1	protein_coding	23	c.2026+105G>A
chrA1	5363086	G	A	PASS	intron_variant	MODIFIER	ATP8A2	ATP8A2	transcript	XM_019820968.3	protein_coding	23	c.2026+105G>A
chrA1	5364378	C	A	PASS	intron_variant	MODIFIER	ATP8A2	ATP8A2	transcript	XM_045043082.1	protein_coding	23	c.2158+1397C>A
chrA1	5364378	C	A	PASS	intron_variant	MODIFIER	ATP8A2	ATP8A2	transcript	XM_006927173.5	protein_coding	23	c.2026+1397C>A
chrA1	5364378	C	A	PASS	intron_variant	MODIFIER	ATP8A2	ATP8A2	transcript	XM_023250034.2	protein_coding	23	c.2146+1397C>A
chrA1	5364378	C	A	PASS	intron_variant	MODIFIER	ATP8A2	ATP8A2	transcript	XM_019820599.3	protein_coding	23	c.2110+1397C>A
chrA1	5364378	C	A	PASS	intron_variant	MODIFIER	ATP8A2	ATP8A2	transcript	XM_045043371.1	protein_coding	23	c.2158+1397C>A
chrA1	5364378	C	A	PASS	intron_variant	MODIFIER	ATP8A2	ATP8A2	transcript	XM_045043107.1	protein_coding	23	c.2158+1397C>A
chrA1	5364378	C	A	PASS	intron_variant	MODIFIER	ATP8A2	ATP8A2	transcript	XM_045043172.1	protein_coding	23	c.2158+1397C>A
chrA1	5364378	C	A	PASS	intron_variant	MODIFIER	ATP8A2	ATP8A2	transcript	XM_045043129.1	protein_coding	23	c.2158+1397C>A
chrA1	5364378	C	A	PASS	intron_variant	MODIFIER	ATP8A2	ATP8A2	transcript	XR_006588849.1	pseudogene	23	n.2203+1397C>A
chrA1	5364378	C	A	PASS	intron_variant	MODIFIER	ATP8A2	ATP8A2	transcript	XM_045043251.1	protein_coding	23	c.2074+1397C>A
chrA1	5364378	C	A	PASS	intron_variant	MODIFIER	ATP8A2	ATP8A2	transcript	XM_045043308.1	protein_coding	23	c.2026+1397C>A
chrA1	5364378	C	A	PASS	intron_variant	MODIFIER	ATP8A2	ATP8A2	transcript	XM_019820968.3	protein_coding	23	c.2026+1397C>A
chrA1	5365176	A	T	PASS	intron_variant	MODIFIER	ATP8A2	ATP8A2	transcript	XM_045043082.1	protein_coding	23	c.2158+2195A>T
chrA1	5365176	A	T	PASS	intron_variant	MODIFIER	ATP8A2	ATP8A2	transcript	XM_006927173.5	protein_coding	23	c.2026+2195A>T
chrA1	5365176	A	T	PASS	intron_variant	MODIFIER	ATP8A2	ATP8A2	transcript	XM_023250034.2	protein_coding	23	c.2146+2195A>T
chrA1	5365176	A	T	PASS	intron_variant	MODIFIER	ATP8A2	ATP8A2	transcript	XM_019820599.3	protein_coding	23	c.2110+2195A>T
chrA1	5365176	A	T	PASS	intron_variant	MODIFIER	ATP8A2	ATP8A2	transcript	XM_045043371.1	protein_coding	23	c.2158+2195A>T
chrA1	5365176	A	T	PASS	intron_variant	MODIFIER	ATP8A2	ATP8A2	transcript	XM_045043107.1	protein_coding	23	c.2158+2195A>T
chrA1	5365176	A	T	PASS	intron_variant	MODIFIER	ATP8A2	ATP8A2	transcript	XM_045043172.1	protein_coding	23	c.2158+2195A>T
chrA1	5365176	A	T	PASS	intron_variant	MODIFIER	ATP8A2	ATP8A2	transcript	XM_045043129.1	protein_coding	23	c.2158+2195A>T
chrA1	5365176	A	T	PASS	intron_variant	MODIFIER	ATP8A2	ATP8A2	transcript	XR_006588849.1	pseudogene	23	n.2203+2195A>T
chrA1	5365176	A	T	PASS	intron_variant	MODIFIER	ATP8A2	ATP8A2	transcript	XM_045043251.1	protein_coding	23	c.2074+2195A>T
chrA1	5365176	A	T	PASS	intron_variant	MODIFIER	ATP8A2	ATP8A2	transcript	XM_045043308.1	protein_coding	23	c.2026+2195A>T
chrA1	5365176	A	T	PASS	intron_variant	MODIFIER	ATP8A2	ATP8A2	transcript	XM_019820968.3	protein_coding	23	c.2026+2195A>T
chrA1	5365500	G	A	PASS	intron_variant	MODIFIER	ATP8A2	ATP8A2	transcript	XM_045043082.1	protein_coding	23	c.2158+2519G>A
chrA1	5365500	G	A	PASS	intron_variant	MODIFIER	ATP8A2	ATP8A2	transcript	XM_006927173.5	protein_coding	23	c.2026+2519G>A
chrA1	5365500	G	A	PASS	intron_variant	MODIFIER	ATP8A2	ATP8A2	transcript	XM_023250034.2	protein_coding	23	c.2146+2519G>A
chrA1	5365500	G	A	PASS	intron_variant	MODIFIER	ATP8A2	ATP8A2	transcript	XM_019820599.3	protein_coding	23	c.2110+2519G>A
chrA1	5365500	G	A	PASS	intron_variant	MODIFIER	ATP8A2	ATP8A2	transcript	XM_045043371.1	protein_coding	23	c.2158+2519G>A
chrA1	5365500	G	A	PASS	intron_variant	MODIFIER	ATP8A2	ATP8A2	transcript	XM_045043107.1	protein_coding	23	c.2158+2519G>A
chrA1	5365500	G	A	PASS	intron_variant	MODIFIER	ATP8A2	ATP8A2	transcript	XM_045043172.1	protein_coding	23	c.2158+2519G>A
chrA1	5365500	G	A	PASS	intron_variant	MODIFIER	ATP8A2	ATP8A2	transcript	XM_045043129.1	protein_coding	23	c.2158+2519G>A
chrA1	5365500	G	A	PASS	intron_variant	MODIFIER	ATP8A2	ATP8A2	transcript	XR_006588849.1	pseudogene	23	n.2203+2519G>A
chrA1	5365500	G	A	PASS	intron_variant	MODIFIER	ATP8A2	ATP8A2	transcript	XM_045043251.1	protein_coding	23	c.2074+2519G>A
chrA1	5365500	G	A	PASS	intron_variant	MODIFIER	ATP8A2	ATP8A2	transcript	XM_045043308.1	protein_coding	23	c.2026+2519G>A
chrA1	5365500	G	A	PASS	intron_variant	MODIFIER	ATP8A2	ATP8A2	transcript	XM_019820968.3	protein_coding	23	c.2026+2519G>A
chrA1	5366336	CTG	C	PASS	intron_variant	MODIFIER	ATP8A2	ATP8A2	transcript	XM_045043082.1	protein_coding	23	c.2158+3356_2158+3357delTG
chrA1	5366336	CTG	C	PASS	intron_variant	MODIFIER	ATP8A2	ATP8A2	transcript	XM_006927173.5	protein_coding	23	c.2026+3356_2026+3357delTG
chrA1	5366336	CTG	C	PASS	intron_variant	MODIFIER	ATP8A2	ATP8A2	transcript	XM_023250034.2	protein_coding	23	c.2146+3356_2146+3357delTG
chrA1	5366336	CTG	C	PASS	intron_variant	MODIFIER	ATP8A2	ATP8A2	transcript	XM_019820599.3	protein_coding	23	c.2110+3356_2110+3357delTG
chrA1	5366336	CTG	C	PASS	intron_variant	MODIFIER	ATP8A2	ATP8A2	transcript	XM_045043371.1	protein_coding	23	c.2158+3356_2158+3357delTG
chrA1	5366336	CTG	C	PASS	intron_variant	MODIFIER	ATP8A2	ATP8A2	transcript	XM_045043107.1	protein_coding	23	c.2158+3356_2158+3357delTG
chrA1	5366336	CTG	C	PASS	intron_variant	MODIFIER	ATP8A2	ATP8A2	transcript	XM_045043172.1	protein_coding	23	c.2158+3356_2158+3357delTG
chrA1	5366336	CTG	C	PASS	intron_variant	MODIFIER	ATP8A2	ATP8A2	transcript	XM_045043129.1	protein_coding	23	c.2158+3356_2158+3357delTG
chrA1	5366336	CTG	C	PASS	intron_variant	MODIFIER	ATP8A2	ATP8A2	transcript	XR_006588849.1	pseudogene	23	n.2203+3356_2203+3357delTG
chrA1	5366336	CTG	C	PASS	intron_variant	MODIFIER	ATP8A2	ATP8A2	transcript	XM_045043251.1	protein_coding	23	c.2074+3356_2074+3357delTG
chrA1	5366336	CTG	C	PASS	intron_variant	MODIFIER	ATP8A2	ATP8A2	transcript	XM_045043308.1	protein_coding	23	c.2026+3356_2026+3357delTG
chrA1	5366336	CTG	C	PASS	intron_variant	MODIFIER	ATP8A2	ATP8A2	transcript	XM_019820968.3	protein_coding	23	c.2026+3356_2026+3357delTG
chrA1	5366378	G	GTC	PASS	intron_variant	MODIFIER	ATP8A2	ATP8A2	transcript	XM_045043082.1	protein_coding	23	c.2158+3397_2158+3398insTC
chrA1	5366378	G	GTC	PASS	intron_variant	MODIFIER	ATP8A2	ATP8A2	transcript	XM_006927173.5	protein_coding	23	c.2026+3397_2026+3398insTC
chrA1	5366378	G	GTC	PASS	intron_variant	MODIFIER	ATP8A2	ATP8A2	transcript	XM_023250034.2	protein_coding	23	c.2146+3397_2146+3398insTC
chrA1	5366378	G	GTC	PASS	intron_variant	MODIFIER	ATP8A2	ATP8A2	transcript	XM_019820599.3	protein_coding	23	c.2110+3397_2110+3398insTC
chrA1	5366378	G	GTC	PASS	intron_variant	MODIFIER	ATP8A2	ATP8A2	transcript	XM_045043371.1	protein_coding	23	c.2158+3397_2158+3398insTC
chrA1	5366378	G	GTC	PASS	intron_variant	MODIFIER	ATP8A2	ATP8A2	transcript	XM_045043107.1	protein_coding	23	c.2158+3397_2158+3398insTC
chrA1	5366378	G	GTC	PASS	intron_variant	MODIFIER	ATP8A2	ATP8A2	transcript	XM_045043172.1	protein_coding	23	c.2158+3397_2158+3398insTC
chrA1	5366378	G	GTC	PASS	intron_variant	MODIFIER	ATP8A2	ATP8A2	transcript	XM_045043129.1	protein_coding	23	c.2158+3397_2158+3398insTC
chrA1	5366378	G	GTC	PASS	intron_variant	MODIFIER	ATP8A2	ATP8A2	transcript	XR_006588849.1	pseudogene	23	n.2203+3397_2203+3398insTC
chrA1	5366378	G	GTC	PASS	intron_variant	MODIFIER	ATP8A2	ATP8A2	transcript	XM_045043251.1	protein_coding	23	c.2074+3397_2074+3398insTC
chrA1	5366378	G	GTC	PASS	intron_variant	MODIFIER	ATP8A2	ATP8A2	transcript	XM_045043308.1	protein_coding	23	c.2026+3397_2026+3398insTC
chrA1	5366378	G	GTC	PASS	intron_variant	MODIFIER	ATP8A2	ATP8A2	transcript	XM_019820968.3	protein_coding	23	c.2026+3397_2026+3398insTC
chrA1	5368645	C	A	PASS	intron_variant	MODIFIER	ATP8A2	ATP8A2	transcript	XM_045043082.1	protein_coding	23	c.2159-3603C>A
chrA1	5368645	C	A	PASS	intron_variant	MODIFIER	ATP8A2	ATP8A2	transcript	XM_006927173.5	protein_coding	23	c.2027-3603C>A
chrA1	5368645	C	A	PASS	intron_variant	MODIFIER	ATP8A2	ATP8A2	transcript	XM_023250034.2	protein_coding	23	c.2147-3603C>A
chrA1	5368645	C	A	PASS	intron_variant	MODIFIER	ATP8A2	ATP8A2	transcript	XM_019820599.3	protein_coding	23	c.2111-3603C>A
chrA1	5368645	C	A	PASS	intron_variant	MODIFIER	ATP8A2	ATP8A2	transcript	XM_045043371.1	protein_coding	23	c.2159-3603C>A
chrA1	5368645	C	A	PASS	intron_variant	MODIFIER	ATP8A2	ATP8A2	transcript	XM_045043107.1	protein_coding	23	c.2159-3603C>A
chrA1	5368645	C	A	PASS	intron_variant	MODIFIER	ATP8A2	ATP8A2	transcript	XM_045043172.1	protein_coding	23	c.2159-3603C>A
chrA1	5368645	C	A	PASS	intron_variant	MODIFIER	ATP8A2	ATP8A2	transcript	XM_045043129.1	protein_coding	23	c.2159-3603C>A
chrA1	5368645	C	A	PASS	intron_variant	MODIFIER	ATP8A2	ATP8A2	transcript	XR_006588849.1	pseudogene	23	n.2204-3603C>A
chrA1	5368645	C	A	PASS	intron_variant	MODIFIER	ATP8A2	ATP8A2	transcript	XM_045043251.1	protein_coding	23	c.2075-3603C>A
chrA1	5368645	C	A	PASS	intron_variant	MODIFIER	ATP8A2	ATP8A2	transcript	XM_045043308.1	protein_coding	23	c.2027-3603C>A
chrA1	5368645	C	A	PASS	intron_variant	MODIFIER	ATP8A2	ATP8A2	transcript	XM_019820968.3	protein_coding	23	c.2027-3603C>A
chrA1	5376871	C	G	PASS	intron_variant	MODIFIER	ATP8A2	ATP8A2	transcript	XM_045043082.1	protein_coding	24	c.2223+4559C>G
chrA1	5376871	C	G	PASS	intron_variant	MODIFIER	ATP8A2	ATP8A2	transcript	XM_006927173.5	protein_coding	24	c.2091+4559C>G
chrA1	5376871	C	G	PASS	intron_variant	MODIFIER	ATP8A2	ATP8A2	transcript	XM_023250034.2	protein_coding	24	c.2211+4559C>G
chrA1	5376871	C	G	PASS	intron_variant	MODIFIER	ATP8A2	ATP8A2	transcript	XM_019820599.3	protein_coding	24	c.2175+4559C>G
chrA1	5376871	C	G	PASS	intron_variant	MODIFIER	ATP8A2	ATP8A2	transcript	XM_045043371.1	protein_coding	24	c.2223+4559C>G
chrA1	5376871	C	G	PASS	intron_variant	MODIFIER	ATP8A2	ATP8A2	transcript	XM_045043107.1	protein_coding	24	c.2223+4559C>G
chrA1	5376871	C	G	PASS	intron_variant	MODIFIER	ATP8A2	ATP8A2	transcript	XM_045043172.1	protein_coding	24	c.2223+4559C>G
chrA1	5376871	C	G	PASS	intron_variant	MODIFIER	ATP8A2	ATP8A2	transcript	XM_045043129.1	protein_coding	24	c.2223+4559C>G
chrA1	5376871	C	G	PASS	intron_variant	MODIFIER	ATP8A2	ATP8A2	transcript	XR_006588849.1	pseudogene	24	n.2268+4559C>G
chrA1	5376871	C	G	PASS	intron_variant	MODIFIER	ATP8A2	ATP8A2	transcript	XM_045043251.1	protein_coding	24	c.2139+4559C>G
chrA1	5376871	C	G	PASS	intron_variant	MODIFIER	ATP8A2	ATP8A2	transcript	XM_045043308.1	protein_coding	24	c.2091+4559C>G
chrA1	5376871	C	G	PASS	intron_variant	MODIFIER	ATP8A2	ATP8A2	transcript	XM_019820968.3	protein_coding	24	c.2091+4559C>G
chrA1	5383107	C	T	PASS	intron_variant	MODIFIER	ATP8A2	ATP8A2	transcript	XM_045043082.1	protein_coding	24	c.2223+10795C>T
chrA1	5383107	C	T	PASS	intron_variant	MODIFIER	ATP8A2	ATP8A2	transcript	XM_006927173.5	protein_coding	24	c.2091+10795C>T
chrA1	5383107	C	T	PASS	intron_variant	MODIFIER	ATP8A2	ATP8A2	transcript	XM_023250034.2	protein_coding	24	c.2211+10795C>T
chrA1	5383107	C	T	PASS	intron_variant	MODIFIER	ATP8A2	ATP8A2	transcript	XM_019820599.3	protein_coding	24	c.2175+10795C>T
chrA1	5383107	C	T	PASS	intron_variant	MODIFIER	ATP8A2	ATP8A2	transcript	XM_045043371.1	protein_coding	24	c.2223+10795C>T
chrA1	5383107	C	T	PASS	intron_variant	MODIFIER	ATP8A2	ATP8A2	transcript	XM_045043107.1	protein_coding	24	c.2223+10795C>T
chrA1	5383107	C	T	PASS	intron_variant	MODIFIER	ATP8A2	ATP8A2	transcript	XM_045043172.1	protein_coding	24	c.2223+10795C>T
chrA1	5383107	C	T	PASS	intron_variant	MODIFIER	ATP8A2	ATP8A2	transcript	XM_045043129.1	protein_coding	24	c.2223+10795C>T
chrA1	5383107	C	T	PASS	intron_variant	MODIFIER	ATP8A2	ATP8A2	transcript	XR_006588849.1	pseudogene	24	n.2268+10795C>T
chrA1	5383107	C	T	PASS	intron_variant	MODIFIER	ATP8A2	ATP8A2	transcript	XM_045043251.1	protein_coding	24	c.2139+10795C>T
chrA1	5383107	C	T	PASS	intron_variant	MODIFIER	ATP8A2	ATP8A2	transcript	XM_045043308.1	protein_coding	24	c.2091+10795C>T
chrA1	5383107	C	T	PASS	intron_variant	MODIFIER	ATP8A2	ATP8A2	transcript	XM_019820968.3	protein_coding	24	c.2091+10795C>T
chrA1	5386555	G	A	PASS	intron_variant	MODIFIER	ATP8A2	ATP8A2	transcript	XM_045043082.1	protein_coding	24	c.2223+14243G>A
chrA1	5386555	G	A	PASS	intron_variant	MODIFIER	ATP8A2	ATP8A2	transcript	XM_006927173.5	protein_coding	24	c.2091+14243G>A
chrA1	5386555	G	A	PASS	intron_variant	MODIFIER	ATP8A2	ATP8A2	transcript	XM_023250034.2	protein_coding	24	c.2211+14243G>A
chrA1	5386555	G	A	PASS	intron_variant	MODIFIER	ATP8A2	ATP8A2	transcript	XM_019820599.3	protein_coding	24	c.2175+14243G>A
chrA1	5386555	G	A	PASS	intron_variant	MODIFIER	ATP8A2	ATP8A2	transcript	XM_045043371.1	protein_coding	24	c.2223+14243G>A
chrA1	5386555	G	A	PASS	intron_variant	MODIFIER	ATP8A2	ATP8A2	transcript	XM_045043107.1	protein_coding	24	c.2223+14243G>A
chrA1	5386555	G	A	PASS	intron_variant	MODIFIER	ATP8A2	ATP8A2	transcript	XM_045043172.1	protein_coding	24	c.2223+14243G>A
chrA1	5386555	G	A	PASS	intron_variant	MODIFIER	ATP8A2	ATP8A2	transcript	XM_045043129.1	protein_coding	24	c.2223+14243G>A
chrA1	5386555	G	A	PASS	intron_variant	MODIFIER	ATP8A2	ATP8A2	transcript	XR_006588849.1	pseudogene	24	n.2268+14243G>A
chrA1	5386555	G	A	PASS	intron_variant	MODIFIER	ATP8A2	ATP8A2	transcript	XM_045043251.1	protein_coding	24	c.2139+14243G>A
chrA1	5386555	G	A	PASS	intron_variant	MODIFIER	ATP8A2	ATP8A2	transcript	XM_045043308.1	protein_coding	24	c.2091+14243G>A
chrA1	5386555	G	A	PASS	intron_variant	MODIFIER	ATP8A2	ATP8A2	transcript	XM_019820968.3	protein_coding	24	c.2091+14243G>A
chrA1	5389099	G	T	PASS	intron_variant	MODIFIER	ATP8A2	ATP8A2	transcript	XM_045043082.1	protein_coding	24	c.2223+16787G>T
chrA1	5389099	G	T	PASS	intron_variant	MODIFIER	ATP8A2	ATP8A2	transcript	XM_006927173.5	protein_coding	24	c.2091+16787G>T
chrA1	5389099	G	T	PASS	intron_variant	MODIFIER	ATP8A2	ATP8A2	transcript	XM_023250034.2	protein_coding	24	c.2211+16787G>T
chrA1	5389099	G	T	PASS	intron_variant	MODIFIER	ATP8A2	ATP8A2	transcript	XM_019820599.3	protein_coding	24	c.2175+16787G>T
chrA1	5389099	G	T	PASS	intron_variant	MODIFIER	ATP8A2	ATP8A2	transcript	XM_045043371.1	protein_coding	24	c.2223+16787G>T
chrA1	5389099	G	T	PASS	intron_variant	MODIFIER	ATP8A2	ATP8A2	transcript	XM_045043107.1	protein_coding	24	c.2223+16787G>T
chrA1	5389099	G	T	PASS	intron_variant	MODIFIER	ATP8A2	ATP8A2	transcript	XM_045043172.1	protein_coding	24	c.2223+16787G>T
chrA1	5389099	G	T	PASS	intron_variant	MODIFIER	ATP8A2	ATP8A2	transcript	XM_045043129.1	protein_coding	24	c.2223+16787G>T
chrA1	5389099	G	T	PASS	intron_variant	MODIFIER	ATP8A2	ATP8A2	transcript	XR_006588849.1	pseudogene	24	n.2268+16787G>T
chrA1	5389099	G	T	PASS	intron_variant	MODIFIER	ATP8A2	ATP8A2	transcript	XM_045043251.1	protein_coding	24	c.2139+16787G>T
chrA1	5389099	G	T	PASS	intron_variant	MODIFIER	ATP8A2	ATP8A2	transcript	XM_045043308.1	protein_coding	24	c.2091+16787G>T
chrA1	5389099	G	T	PASS	intron_variant	MODIFIER	ATP8A2	ATP8A2	transcript	XM_019820968.3	protein_coding	24	c.2091+16787G>T
chrA1	5397031	C	T	PASS	intron_variant	MODIFIER	ATP8A2	ATP8A2	transcript	XM_045043082.1	protein_coding	24	c.2223+24719C>T
chrA1	5397031	C	T	PASS	intron_variant	MODIFIER	ATP8A2	ATP8A2	transcript	XM_006927173.5	protein_coding	24	c.2091+24719C>T
chrA1	5397031	C	T	PASS	intron_variant	MODIFIER	ATP8A2	ATP8A2	transcript	XM_023250034.2	protein_coding	24	c.2211+24719C>T
chrA1	5397031	C	T	PASS	intron_variant	MODIFIER	ATP8A2	ATP8A2	transcript	XM_019820599.3	protein_coding	24	c.2175+24719C>T
chrA1	5397031	C	T	PASS	intron_variant	MODIFIER	ATP8A2	ATP8A2	transcript	XM_045043371.1	protein_coding	24	c.2223+24719C>T
chrA1	5397031	C	T	PASS	intron_variant	MODIFIER	ATP8A2	ATP8A2	transcript	XM_045043107.1	protein_coding	24	c.2223+24719C>T
chrA1	5397031	C	T	PASS	intron_variant	MODIFIER	ATP8A2	ATP8A2	transcript	XM_045043172.1	protein_coding	24	c.2223+24719C>T
chrA1	5397031	C	T	PASS	intron_variant	MODIFIER	ATP8A2	ATP8A2	transcript	XM_045043129.1	protein_coding	24	c.2223+24719C>T
chrA1	5397031	C	T	PASS	intron_variant	MODIFIER	ATP8A2	ATP8A2	transcript	XR_006588849.1	pseudogene	24	n.2268+24719C>T
chrA1	5397031	C	T	PASS	intron_variant	MODIFIER	ATP8A2	ATP8A2	transcript	XM_045043251.1	protein_coding	24	c.2139+24719C>T
chrA1	5397031	C	T	PASS	intron_variant	MODIFIER	ATP8A2	ATP8A2	transcript	XM_045043308.1	protein_coding	24	c.2091+24719C>T
chrA1	5397031	C	T	PASS	intron_variant	MODIFIER	ATP8A2	ATP8A2	transcript	XM_019820968.3	protein_coding	24	c.2091+24719C>T
chrA1	5419219	T	A	PASS	intron_variant	MODIFIER	ATP8A2	ATP8A2	transcript	XM_045043082.1	protein_coding	24	c.2223+46907T>A
chrA1	5419219	T	A	PASS	intron_variant	MODIFIER	ATP8A2	ATP8A2	transcript	XM_006927173.5	protein_coding	24	c.2091+46907T>A
chrA1	5419219	T	A	PASS	intron_variant	MODIFIER	ATP8A2	ATP8A2	transcript	XM_023250034.2	protein_coding	24	c.2211+46907T>A
chrA1	5419219	T	A	PASS	intron_variant	MODIFIER	ATP8A2	ATP8A2	transcript	XM_019820599.3	protein_coding	24	c.2175+46907T>A
chrA1	5419219	T	A	PASS	intron_variant	MODIFIER	ATP8A2	ATP8A2	transcript	XM_045043371.1	protein_coding	24	c.2223+46907T>A
chrA1	5419219	T	A	PASS	intron_variant	MODIFIER	ATP8A2	ATP8A2	transcript	XM_045043107.1	protein_coding	24	c.2223+46907T>A
chrA1	5419219	T	A	PASS	intron_variant	MODIFIER	ATP8A2	ATP8A2	transcript	XM_045043172.1	protein_coding	24	c.2223+46907T>A
chrA1	5419219	T	A	PASS	intron_variant	MODIFIER	ATP8A2	ATP8A2	transcript	XM_045043129.1	protein_coding	24	c.2223+46907T>A
chrA1	5419219	T	A	PASS	intron_variant	MODIFIER	ATP8A2	ATP8A2	transcript	XR_006588849.1	pseudogene	24	n.2268+46907T>A
chrA1	5419219	T	A	PASS	intron_variant	MODIFIER	ATP8A2	ATP8A2	transcript	XM_045043251.1	protein_coding	24	c.2139+46907T>A
chrA1	5419219	T	A	PASS	intron_variant	MODIFIER	ATP8A2	ATP8A2	transcript	XM_045043308.1	protein_coding	24	c.2091+46907T>A
chrA1	5419219	T	A	PASS	intron_variant	MODIFIER	ATP8A2	ATP8A2	transcript	XM_019820968.3	protein_coding	24	c.2091+46907T>A
chrA1	5443040	C	T	PASS	intron_variant	MODIFIER	ATP8A2	ATP8A2	transcript	XM_045043082.1	protein_coding	24	c.2224-24388C>T
chrA1	5443040	C	T	PASS	intron_variant	MODIFIER	ATP8A2	ATP8A2	transcript	XM_006927173.5	protein_coding	24	c.2092-24388C>T
chrA1	5443040	C	T	PASS	intron_variant	MODIFIER	ATP8A2	ATP8A2	transcript	XM_023250034.2	protein_coding	24	c.2212-24388C>T
chrA1	5443040	C	T	PASS	intron_variant	MODIFIER	ATP8A2	ATP8A2	transcript	XM_019820599.3	protein_coding	24	c.2176-24388C>T
chrA1	5443040	C	T	PASS	intron_variant	MODIFIER	ATP8A2	ATP8A2	transcript	XM_045043371.1	protein_coding	24	c.2224-24388C>T
chrA1	5443040	C	T	PASS	intron_variant	MODIFIER	ATP8A2	ATP8A2	transcript	XM_045043107.1	protein_coding	24	c.2224-24388C>T
chrA1	5443040	C	T	PASS	intron_variant	MODIFIER	ATP8A2	ATP8A2	transcript	XM_045043172.1	protein_coding	24	c.2224-24388C>T
chrA1	5443040	C	T	PASS	intron_variant	MODIFIER	ATP8A2	ATP8A2	transcript	XM_045043129.1	protein_coding	24	c.2224-24388C>T
chrA1	5443040	C	T	PASS	intron_variant	MODIFIER	ATP8A2	ATP8A2	transcript	XR_006588849.1	pseudogene	24	n.2269-24388C>T
chrA1	5443040	C	T	PASS	intron_variant	MODIFIER	ATP8A2	ATP8A2	transcript	XM_045043251.1	protein_coding	24	c.2140-24388C>T
chrA1	5443040	C	T	PASS	intron_variant	MODIFIER	ATP8A2	ATP8A2	transcript	XM_045043308.1	protein_coding	24	c.2092-24388C>T
chrA1	5443040	C	T	PASS	intron_variant	MODIFIER	ATP8A2	ATP8A2	transcript	XM_019820968.3	protein_coding	24	c.2092-24388C>T
chrA1	5443920	ATT	A	PASS	intron_variant	MODIFIER	ATP8A2	ATP8A2	transcript	XM_045043082.1	protein_coding	24	c.2224-23507_2224-23506delTT
chrA1	5443920	ATT	A	PASS	intron_variant	MODIFIER	ATP8A2	ATP8A2	transcript	XM_006927173.5	protein_coding	24	c.2092-23507_2092-23506delTT
chrA1	5443920	ATT	A	PASS	intron_variant	MODIFIER	ATP8A2	ATP8A2	transcript	XM_023250034.2	protein_coding	24	c.2212-23507_2212-23506delTT
chrA1	5443920	ATT	A	PASS	intron_variant	MODIFIER	ATP8A2	ATP8A2	transcript	XM_019820599.3	protein_coding	24	c.2176-23507_2176-23506delTT
chrA1	5443920	ATT	A	PASS	intron_variant	MODIFIER	ATP8A2	ATP8A2	transcript	XM_045043371.1	protein_coding	24	c.2224-23507_2224-23506delTT
chrA1	5443920	ATT	A	PASS	intron_variant	MODIFIER	ATP8A2	ATP8A2	transcript	XM_045043107.1	protein_coding	24	c.2224-23507_2224-23506delTT
chrA1	5443920	ATT	A	PASS	intron_variant	MODIFIER	ATP8A2	ATP8A2	transcript	XM_045043172.1	protein_coding	24	c.2224-23507_2224-23506delTT
chrA1	5443920	ATT	A	PASS	intron_variant	MODIFIER	ATP8A2	ATP8A2	transcript	XM_045043129.1	protein_coding	24	c.2224-23507_2224-23506delTT
chrA1	5443920	ATT	A	PASS	intron_variant	MODIFIER	ATP8A2	ATP8A2	transcript	XR_006588849.1	pseudogene	24	n.2269-23507_2269-23506delTT
chrA1	5443920	ATT	A	PASS	intron_variant	MODIFIER	ATP8A2	ATP8A2	transcript	XM_045043251.1	protein_coding	24	c.2140-23507_2140-23506delTT
chrA1	5443920	ATT	A	PASS	intron_variant	MODIFIER	ATP8A2	ATP8A2	transcript	XM_045043308.1	protein_coding	24	c.2092-23507_2092-23506delTT
chrA1	5443920	ATT	A	PASS	intron_variant	MODIFIER	ATP8A2	ATP8A2	transcript	XM_019820968.3	protein_coding	24	c.2092-23507_2092-23506delTT
chrA1	5456433	C	T	PASS	intron_variant	MODIFIER	ATP8A2	ATP8A2	transcript	XM_045043082.1	protein_coding	24	c.2224-10995C>T
chrA1	5456433	C	T	PASS	intron_variant	MODIFIER	LOC109495412	LOC109495412	transcript	XR_002150819.3	pseudogene	1	n.780-38G>A
chrA1	5456433	C	T	PASS	intron_variant	MODIFIER	ATP8A2	ATP8A2	transcript	XM_006927173.5	protein_coding	24	c.2092-10995C>T
chrA1	5456433	C	T	PASS	intron_variant	MODIFIER	ATP8A2	ATP8A2	transcript	XM_023250034.2	protein_coding	24	c.2212-10995C>T
chrA1	5456433	C	T	PASS	intron_variant	MODIFIER	ATP8A2	ATP8A2	transcript	XM_019820599.3	protein_coding	24	c.2176-10995C>T
chrA1	5456433	C	T	PASS	intron_variant	MODIFIER	ATP8A2	ATP8A2	transcript	XM_045043371.1	protein_coding	24	c.2224-10995C>T
chrA1	5456433	C	T	PASS	intron_variant	MODIFIER	ATP8A2	ATP8A2	transcript	XM_045043107.1	protein_coding	24	c.2224-10995C>T
chrA1	5456433	C	T	PASS	intron_variant	MODIFIER	ATP8A2	ATP8A2	transcript	XM_045043172.1	protein_coding	24	c.2224-10995C>T
chrA1	5456433	C	T	PASS	intron_variant	MODIFIER	ATP8A2	ATP8A2	transcript	XM_045043129.1	protein_coding	24	c.2224-10995C>T
chrA1	5456433	C	T	PASS	intron_variant	MODIFIER	ATP8A2	ATP8A2	transcript	XR_006588849.1	pseudogene	24	n.2269-10995C>T
chrA1	5456433	C	T	PASS	intron_variant	MODIFIER	ATP8A2	ATP8A2	transcript	XM_045043251.1	protein_coding	24	c.2140-10995C>T
chrA1	5456433	C	T	PASS	intron_variant	MODIFIER	ATP8A2	ATP8A2	transcript	XM_045043308.1	protein_coding	24	c.2092-10995C>T
chrA1	5456433	C	T	PASS	intron_variant	MODIFIER	ATP8A2	ATP8A2	transcript	XM_019820968.3	protein_coding	24	c.2092-10995C>T
chrA1	5456459	A	T	PASS	intron_variant	MODIFIER	ATP8A2	ATP8A2	transcript	XM_045043082.1	protein_coding	24	c.2224-10969A>T
chrA1	5456459	A	T	PASS	intron_variant	MODIFIER	LOC109495412	LOC109495412	transcript	XR_002150819.3	pseudogene	1	n.779+44T>A
chrA1	5456459	A	T	PASS	intron_variant	MODIFIER	ATP8A2	ATP8A2	transcript	XM_006927173.5	protein_coding	24	c.2092-10969A>T
chrA1	5456459	A	T	PASS	intron_variant	MODIFIER	ATP8A2	ATP8A2	transcript	XM_023250034.2	protein_coding	24	c.2212-10969A>T
chrA1	5456459	A	T	PASS	intron_variant	MODIFIER	ATP8A2	ATP8A2	transcript	XM_019820599.3	protein_coding	24	c.2176-10969A>T
chrA1	5456459	A	T	PASS	intron_variant	MODIFIER	ATP8A2	ATP8A2	transcript	XM_045043371.1	protein_coding	24	c.2224-10969A>T
chrA1	5456459	A	T	PASS	intron_variant	MODIFIER	ATP8A2	ATP8A2	transcript	XM_045043107.1	protein_coding	24	c.2224-10969A>T
chrA1	5456459	A	T	PASS	intron_variant	MODIFIER	ATP8A2	ATP8A2	transcript	XM_045043172.1	protein_coding	24	c.2224-10969A>T
chrA1	5456459	A	T	PASS	intron_variant	MODIFIER	ATP8A2	ATP8A2	transcript	XM_045043129.1	protein_coding	24	c.2224-10969A>T
chrA1	5456459	A	T	PASS	intron_variant	MODIFIER	ATP8A2	ATP8A2	transcript	XR_006588849.1	pseudogene	24	n.2269-10969A>T
chrA1	5456459	A	T	PASS	intron_variant	MODIFIER	ATP8A2	ATP8A2	transcript	XM_045043251.1	protein_coding	24	c.2140-10969A>T
chrA1	5456459	A	T	PASS	intron_variant	MODIFIER	ATP8A2	ATP8A2	transcript	XM_045043308.1	protein_coding	24	c.2092-10969A>T
chrA1	5456459	A	T	PASS	intron_variant	MODIFIER	ATP8A2	ATP8A2	transcript	XM_019820968.3	protein_coding	24	c.2092-10969A>T
chrA1	5516543	C	A	PASS	intron_variant	MODIFIER	ATP8A2	ATP8A2	transcript	XM_045043082.1	protein_coding	25	c.2397-21833C>A
chrA1	5516543	C	A	PASS	intron_variant	MODIFIER	ATP8A2	ATP8A2	transcript	XM_006927173.5	protein_coding	25	c.2265-21833C>A
chrA1	5516543	C	A	PASS	intron_variant	MODIFIER	ATP8A2	ATP8A2	transcript	XM_023250034.2	protein_coding	25	c.2385-21833C>A
chrA1	5516543	C	A	PASS	intron_variant	MODIFIER	ATP8A2	ATP8A2	transcript	XM_019820599.3	protein_coding	25	c.2349-21833C>A
chrA1	5516543	C	A	PASS	intron_variant	MODIFIER	ATP8A2	ATP8A2	transcript	XM_045043371.1	protein_coding	25	c.2397-21833C>A
chrA1	5516543	C	A	PASS	intron_variant	MODIFIER	ATP8A2	ATP8A2	transcript	XM_045043107.1	protein_coding	25	c.2397-21833C>A
chrA1	5516543	C	A	PASS	intron_variant	MODIFIER	ATP8A2	ATP8A2	transcript	XM_045043172.1	protein_coding	25	c.2397-21833C>A
chrA1	5516543	C	A	PASS	intron_variant	MODIFIER	ATP8A2	ATP8A2	transcript	XM_045043129.1	protein_coding	25	c.2397-21833C>A
chrA1	5516543	C	A	PASS	intron_variant	MODIFIER	ATP8A2	ATP8A2	transcript	XR_006588849.1	pseudogene	25	n.2442-21833C>A
chrA1	5516543	C	A	PASS	intron_variant	MODIFIER	ATP8A2	ATP8A2	transcript	XM_045043251.1	protein_coding	25	c.2313-21833C>A
chrA1	5516543	C	A	PASS	intron_variant	MODIFIER	ATP8A2	ATP8A2	transcript	XM_045043308.1	protein_coding	25	c.2265-21833C>A
chrA1	5516543	C	A	PASS	intron_variant	MODIFIER	ATP8A2	ATP8A2	transcript	XM_019820968.3	protein_coding	25	c.2265-21833C>A
chrA1	5568839	A	C	PASS	intron_variant	MODIFIER	ATP8A2	ATP8A2	transcript	XM_045043082.1	protein_coding	27	c.2691+25234A>C
chrA1	5568839	A	C	PASS	intron_variant	MODIFIER	ATP8A2	ATP8A2	transcript	XM_006927173.5	protein_coding	27	c.2559+25234A>C
chrA1	5568839	A	C	PASS	intron_variant	MODIFIER	ATP8A2	ATP8A2	transcript	XM_023250034.2	protein_coding	27	c.2679+25234A>C
chrA1	5568839	A	C	PASS	intron_variant	MODIFIER	ATP8A2	ATP8A2	transcript	XM_019820599.3	protein_coding	27	c.2643+25234A>C
chrA1	5568839	A	C	PASS	intron_variant	MODIFIER	ATP8A2	ATP8A2	transcript	XM_045043371.1	protein_coding	27	c.2691+25234A>C
chrA1	5568839	A	C	PASS	intron_variant	MODIFIER	ATP8A2	ATP8A2	transcript	XM_045043107.1	protein_coding	27	c.2691+25234A>C
chrA1	5568839	A	C	PASS	intron_variant	MODIFIER	ATP8A2	ATP8A2	transcript	XM_045043172.1	protein_coding	27	c.2691+25234A>C
chrA1	5568839	A	C	PASS	intron_variant	MODIFIER	ATP8A2	ATP8A2	transcript	XM_045043129.1	protein_coding	27	c.2691+25234A>C
chrA1	5568839	A	C	PASS	intron_variant	MODIFIER	ATP8A2	ATP8A2	transcript	XR_006588849.1	pseudogene	27	n.2736+25234A>C
chrA1	5568839	A	C	PASS	intron_variant	MODIFIER	ATP8A2	ATP8A2	transcript	XM_045043251.1	protein_coding	27	c.2607+25234A>C
chrA1	5568839	A	C	PASS	intron_variant	MODIFIER	ATP8A2	ATP8A2	transcript	XM_045043308.1	protein_coding	27	c.2559+25234A>C
chrA1	5568839	A	C	PASS	intron_variant	MODIFIER	ATP8A2	ATP8A2	transcript	XM_019820968.3	protein_coding	27	c.2559+25234A>C
chrA1	5596614	G	A	PASS	missense_variant	MODERATE	ATP8A2	ATP8A2	transcript	XM_045043082.1	protein_coding	28	c.2741G>A	p.Arg914His
chrA1	5596614	G	A	PASS	missense_variant	MODERATE	ATP8A2	ATP8A2	transcript	XM_006927173.5	protein_coding	28	c.2609G>A	p.Arg870His
chrA1	5596614	G	A	PASS	missense_variant	MODERATE	ATP8A2	ATP8A2	transcript	XM_023250034.2	protein_coding	28	c.2729G>A	p.Arg910His
chrA1	5596614	G	A	PASS	missense_variant	MODERATE	ATP8A2	ATP8A2	transcript	XM_019820599.3	protein_coding	28	c.2693G>A	p.Arg898His
chrA1	5596614	G	A	PASS	missense_variant	MODERATE	ATP8A2	ATP8A2	transcript	XM_045043371.1	protein_coding	28	c.2741G>A	p.Arg914His
chrA1	5596614	G	A	PASS	missense_variant	MODERATE	ATP8A2	ATP8A2	transcript	XM_045043107.1	protein_coding	28	c.2741G>A	p.Arg914His
chrA1	5596614	G	A	PASS	missense_variant	MODERATE	ATP8A2	ATP8A2	transcript	XM_045043172.1	protein_coding	28	c.2741G>A	p.Arg914His
chrA1	5596614	G	A	PASS	missense_variant	MODERATE	ATP8A2	ATP8A2	transcript	XM_045043129.1	protein_coding	28	c.2741G>A	p.Arg914His
chrA1	5596614	G	A	PASS	missense_variant	MODERATE	ATP8A2	ATP8A2	transcript	XM_045043251.1	protein_coding	28	c.2657G>A	p.Arg886His
chrA1	5596614	G	A	PASS	missense_variant	MODERATE	ATP8A2	ATP8A2	transcript	XM_045043308.1	protein_coding	28	c.2609G>A	p.Arg870His
chrA1	5596614	G	A	PASS	missense_variant	MODERATE	ATP8A2	ATP8A2	transcript	XM_019820968.3	protein_coding	28	c.2609G>A	p.Arg870His
chrA1	5596614	G	A	PASS	non_coding_transcript_exon_variant	MODIFIER	ATP8A2	ATP8A2	transcript	XR_006588849.1	pseudogene	28	n.2786G>A
chrA1	5725408	G	A	PASS	intron_variant	MODIFIER	ATP8A2	ATP8A2	transcript	XM_045043082.1	protein_coding	35	c.3389+4803G>A
chrA1	5725408	G	A	PASS	intron_variant	MODIFIER	ATP8A2	ATP8A2	transcript	XM_006927173.5	protein_coding	35	c.3257+4803G>A
chrA1	5725408	G	A	PASS	intron_variant	MODIFIER	ATP8A2	ATP8A2	transcript	XM_023250034.2	protein_coding	35	c.3377+4803G>A
chrA1	5725408	G	A	PASS	intron_variant	MODIFIER	ATP8A2	ATP8A2	transcript	XM_019820599.3	protein_coding	35	c.3341+4803G>A
chrA1	5725408	G	A	PASS	intron_variant	MODIFIER	ATP8A2	ATP8A2	transcript	XM_045043107.1	protein_coding	35	c.3389+4803G>A
chrA1	5725408	G	A	PASS	intron_variant	MODIFIER	ATP8A2	ATP8A2	transcript	XM_045043172.1	protein_coding	35	c.3389+4803G>A
chrA1	5725408	G	A	PASS	intron_variant	MODIFIER	ATP8A2	ATP8A2	transcript	XM_045043129.1	protein_coding	35	c.3389+4803G>A
chrA1	5725408	G	A	PASS	intron_variant	MODIFIER	ATP8A2	ATP8A2	transcript	XR_006588849.1	pseudogene	35	n.3434+4803G>A
chrA1	5725408	G	A	PASS	intron_variant	MODIFIER	ATP8A2	ATP8A2	transcript	XM_045043251.1	protein_coding	35	c.3305+4803G>A
chrA1	5725408	G	A	PASS	intron_variant	MODIFIER	ATP8A2	ATP8A2	transcript	XM_045043308.1	protein_coding	35	c.3257+4803G>A
chrA1	5725408	G	A	PASS	intron_variant	MODIFIER	ATP8A2	ATP8A2	transcript	XM_019820968.3	protein_coding	35	c.3257+4803G>A
chrA1	5785876	G	A	PASS	downstream_gene_variant	MODIFIER	ATP8A2	ATP8A2	transcript	XM_045043172.1	protein_coding	-1	c.*4983G>A
chrA1	5785876	G	A	PASS	intron_variant	MODIFIER	SHISA2	SHISA2	transcript	XM_023250064.2	protein_coding	1	c.335-1725C>T
chrA1	5785876	G	A	PASS	intron_variant	MODIFIER	ATP8A2	ATP8A2	transcript	XM_045043129.1	protein_coding	37	c.*4-15525G>A
chrA1	5785876	G	A	PASS	intron_variant	MODIFIER	ATP8A2	ATP8A2	transcript	XR_006588849.1	pseudogene	38	n.3713+4894G>A
chrA1	5943893	TATATATATATATATAC	T	PASS	intron_variant	MODIFIER	LOC101096779	LOC101096779	transcript	XM_019821051.3	protein_coding	25	c.2259-2089_2259-2074delGTATATATATATATAT
chrA1	5943893	TATATATATATATATAC	T	PASS	intron_variant	MODIFIER	LOC123381855	LOC123381855	transcript	XR_006589348.1	pseudogene	2	n.982+721_982+736delATATATATATATATAC
chrA1	5943893	TATATATATATATATAC	T	PASS	intron_variant	MODIFIER	LOC101096779	LOC101096779	transcript	XM_023250092.2	protein_coding	23	c.2007-2089_2007-2074delGTATATATATATATAT
chrA1	5943893	TATATATATATATATAC	T	PASS	intron_variant	MODIFIER	LOC101096779	LOC101096779	transcript	XM_023250074.2	protein_coding	25	c.2259-2089_2259-2074delGTATATATATATATAT
chrA1	5943893	TATATATATATATATAC	T	PASS	intron_variant	MODIFIER	LOC101096779	LOC101096779	transcript	XM_023250077.2	protein_coding	25	c.2259-2089_2259-2074delGTATATATATATATAT
chrA1	5943893	TATATATATATATATAC	T	PASS	intron_variant	MODIFIER	LOC101096779	LOC101096779	transcript	XM_045043712.1	protein_coding	27	c.2259-2089_2259-2074delGTATATATATATATAT
chrA1	5943893	TATATATATATATATAC	T	PASS	intron_variant	MODIFIER	LOC101096779	LOC101096779	transcript	XM_045043743.1	protein_coding	26	c.2259-2089_2259-2074delGTATATATATATATAT
chrA1	5943893	TATATATATATATATAC	T	PASS	intron_variant	MODIFIER	LOC101096779	LOC101096779	transcript	XM_045044076.1	protein_coding	25	c.2007-2089_2007-2074delGTATATATATATATAT
chrA1	5943893	TATATATATATATATAC	T	PASS	intron_variant	MODIFIER	LOC101096779	LOC101096779	transcript	XM_045043925.1	protein_coding	25	c.2259-2089_2259-2074delGTATATATATATATAT
chrA1	5943893	TATATATATATATATAC	T	PASS	intron_variant	MODIFIER	LOC101096779	LOC101096779	transcript	XM_023250096.2	protein_coding	20	c.1899-2089_1899-2074delGTATATATATATATAT
chrA1	5943893	TATATATATATATATAC	T	PASS	intron_variant	MODIFIER	LOC101096779	LOC101096779	transcript	XM_045043852.1	protein_coding	27	c.2259-2089_2259-2074delGTATATATATATATAT
chrA1	5943893	TATATATATATATATAC	T	PASS	intron_variant	MODIFIER	LOC101096779	LOC101096779	transcript	XM_045043891.1	protein_coding	26	c.2259-2089_2259-2074delGTATATATATATATAT
chrA1	5943893	TATATATATATATATAC	T	PASS	intron_variant	MODIFIER	LOC101096779	LOC101096779	transcript	XM_045043970.1	protein_coding	25	c.2259-2089_2259-2074delGTATATATATATATAT
chrA1	5943893	TATATATATATATATAC	T	PASS	intron_variant	MODIFIER	LOC101096779	LOC101096779	transcript	XM_023250089.2	protein_coding	25	c.2259-2089_2259-2074delGTATATATATATATAT
chrA1	5943893	TATATATATATATATAC	T	PASS	intron_variant	MODIFIER	LOC101096779	LOC101096779	transcript	XM_045043975.1	protein_coding	25	c.2259-2089_2259-2074delGTATATATATATATAT
chrA1	5943893	TATATATATATATATAC	T	PASS	intron_variant	MODIFIER	LOC101096779	LOC101096779	transcript	XM_045044103.1	protein_coding	21	c.1950-2089_1950-2074delGTATATATATATATAT
chrA1	5943893	TATATATATATATATAC	T	PASS	intron_variant	MODIFIER	LOC101096779	LOC101096779	transcript	XR_006589310.1	pseudogene	25	n.2536-2089_2536-2074delGTATATATATATATAT
chrA1	5943893	TATATATATATATATAC	T	PASS	intron_variant	MODIFIER	LOC101096779	LOC101096779	transcript	XM_045044198.1	protein_coding	25	c.2259-2089_2259-2074delGTATATATATATATAT
chrA1	5943893	TATATATATATATATAC	T	PASS	intron_variant	MODIFIER	LOC101096779	LOC101096779	transcript	XR_006589332.1	pseudogene	25	n.2535-2089_2535-2074delGTATATATATATATAT
chrA1	5943893	TATATATATATATATAC	T	PASS	intron_variant	MODIFIER	LOC123381855	LOC123381855	transcript	XR_006589365.1	pseudogene	2	n.1055+648_1055+663delATATATATATATATAC
chrA1	6180032	G	A	PASS	intron_variant	MODIFIER	CDK8	CDK8	transcript	XM_003980264.6	protein_coding	2	c.204+2630G>A
chrA1	6180032	G	A	PASS	intron_variant	MODIFIER	LOC109495641	LOC109495641	transcript	XR_002740421.2	pseudogene	1	n.254+7605C>T
chrA1	6180032	G	A	PASS	intron_variant	MODIFIER	CDK8	CDK8	transcript	XM_045044570.1	protein_coding	2	c.204+2630G>A
chrA1	6180032	G	A	PASS	intron_variant	MODIFIER	CDK8	CDK8	transcript	XM_045044624.1	protein_coding	2	c.204+2630G>A
chrA1	6180032	G	A	PASS	intron_variant	MODIFIER	CDK8	CDK8	transcript	XM_045044653.1	protein_coding	2	c.204+2630G>A
chrA1	6180032	G	A	PASS	intron_variant	MODIFIER	CDK8	CDK8	transcript	XR_006589566.1	pseudogene	2	n.898+2630G>A
chrA1	6180032	G	A	PASS	intron_variant	MODIFIER	CDK8	CDK8	transcript	XM_019821740.3	protein_coding	2	c.204+2630G>A
chrA1	6180032	G	A	PASS	intron_variant	MODIFIER	CDK8	CDK8	transcript	XM_006927174.5	protein_coding	2	c.204+2630G>A
chrA1	6190976	C	T	PASS	upstream_gene_variant	MODIFIER	LOC109495641	LOC109495641	transcript	XR_002740421.2	pseudogene	-1	n.-3086G>A
chrA1	6190976	C	T	PASS	upstream_gene_variant	MODIFIER	CDK8	CDK8	transcript	XM_019821783.2	protein_coding	-1	c.-853C>T
chrA1	6190976	C	T	PASS	intron_variant	MODIFIER	CDK8	CDK8	transcript	XM_003980264.6	protein_coding	3	c.316-707C>T
chrA1	6190976	C	T	PASS	intron_variant	MODIFIER	CDK8	CDK8	transcript	XM_045044570.1	protein_coding	3	c.316-707C>T
chrA1	6190976	C	T	PASS	intron_variant	MODIFIER	CDK8	CDK8	transcript	XM_045044624.1	protein_coding	3	c.316-707C>T
chrA1	6190976	C	T	PASS	intron_variant	MODIFIER	CDK8	CDK8	transcript	XM_045044653.1	protein_coding	3	c.316-707C>T
chrA1	6190976	C	T	PASS	intron_variant	MODIFIER	CDK8	CDK8	transcript	XR_006589566.1	pseudogene	3	n.1010-707C>T
chrA1	6190976	C	T	PASS	intron_variant	MODIFIER	CDK8	CDK8	transcript	XM_019821740.3	protein_coding	3	c.316-707C>T
chrA1	6190976	C	T	PASS	intron_variant	MODIFIER	CDK8	CDK8	transcript	XM_006927174.5	protein_coding	3	c.316-707C>T
chrA1	6190976	C	T	PASS	non_coding_transcript_exon_variant	MODIFIER	LOC123381963	LOC123381963	transcript	XR_006589650.1	pseudogene	2	n.1301G>A
chrA1	6201017	G	A	PASS	intron_variant	MODIFIER	CDK8	CDK8	transcript	XM_003980264.6	protein_coding	4	c.456+9194G>A
chrA1	6201017	G	A	PASS	intron_variant	MODIFIER	CDK8	CDK8	transcript	XM_045044570.1	protein_coding	4	c.456+9194G>A
chrA1	6201017	G	A	PASS	intron_variant	MODIFIER	CDK8	CDK8	transcript	XM_045044624.1	protein_coding	4	c.456+9194G>A
chrA1	6201017	G	A	PASS	intron_variant	MODIFIER	CDK8	CDK8	transcript	XM_045044653.1	protein_coding	4	c.456+9194G>A
chrA1	6201017	G	A	PASS	intron_variant	MODIFIER	CDK8	CDK8	transcript	XR_006589566.1	pseudogene	4	n.1150+9194G>A
chrA1	6201017	G	A	PASS	intron_variant	MODIFIER	CDK8	CDK8	transcript	XM_019821740.3	protein_coding	4	c.456+9194G>A
chrA1	6201017	G	A	PASS	intron_variant	MODIFIER	CDK8	CDK8	transcript	XM_006927174.5	protein_coding	4	c.456+9194G>A
chrA1	6201017	G	A	PASS	intron_variant	MODIFIER	CDK8	CDK8	transcript	XM_019821783.2	protein_coding	1	c.-6+9194G>A
chrA1	6202954	A	AAATAAATC	PASS	intron_variant	MODIFIER	CDK8	CDK8	transcript	XM_003980264.6	protein_coding	4	c.457-9420_457-9419insAATAAATC
chrA1	6202954	A	AAATAAATC	PASS	intron_variant	MODIFIER	CDK8	CDK8	transcript	XM_045044570.1	protein_coding	4	c.457-9420_457-9419insAATAAATC
chrA1	6202954	A	AAATAAATC	PASS	intron_variant	MODIFIER	CDK8	CDK8	transcript	XM_045044624.1	protein_coding	4	c.457-9420_457-9419insAATAAATC
chrA1	6202954	A	AAATAAATC	PASS	intron_variant	MODIFIER	CDK8	CDK8	transcript	XM_045044653.1	protein_coding	4	c.457-9420_457-9419insAATAAATC
chrA1	6202954	A	AAATAAATC	PASS	intron_variant	MODIFIER	CDK8	CDK8	transcript	XR_006589566.1	pseudogene	4	n.1151-9420_1151-9419insAATAAATC
chrA1	6202954	A	AAATAAATC	PASS	intron_variant	MODIFIER	CDK8	CDK8	transcript	XM_019821740.3	protein_coding	4	c.457-9420_457-9419insAATAAATC
chrA1	6202954	A	AAATAAATC	PASS	intron_variant	MODIFIER	CDK8	CDK8	transcript	XM_006927174.5	protein_coding	4	c.457-9420_457-9419insAATAAATC
chrA1	6202954	A	AAATAAATC	PASS	intron_variant	MODIFIER	CDK8	CDK8	transcript	XM_019821783.2	protein_coding	1	c.-6+11131_-6+11132insAATAAATC
chrA1	6233633	T	C	PASS	downstream_gene_variant	MODIFIER	CDK8	CDK8	transcript	XM_003980264.6	protein_coding	-1	c.*1613T>C
chrA1	6233633	T	C	PASS	downstream_gene_variant	MODIFIER	CDK8	CDK8	transcript	XM_045044570.1	protein_coding	-1	c.*3127T>C
chrA1	6233633	T	C	PASS	downstream_gene_variant	MODIFIER	CDK8	CDK8	transcript	XM_019821740.3	protein_coding	-1	c.*1613T>C
chrA1	6233633	T	C	PASS	downstream_gene_variant	MODIFIER	CDK8	CDK8	transcript	XM_006927174.5	protein_coding	-1	c.*1613T>C
chrA1	6233633	T	C	PASS	downstream_gene_variant	MODIFIER	CDK8	CDK8	transcript	XM_019821783.2	protein_coding	-1	c.*1613T>C
chrA1	6233633	T	C	PASS	intron_variant	MODIFIER	CDK8	CDK8	transcript	XM_045044624.1	protein_coding	12	c.1269+4225T>C
chrA1	6233633	T	C	PASS	intron_variant	MODIFIER	CDK8	CDK8	transcript	XM_045044653.1	protein_coding	12	c.1269+4225T>C
chrA1	6233633	T	C	PASS	intron_variant	MODIFIER	CDK8	CDK8	transcript	XR_006589566.1	pseudogene	12	n.1963+4225T>C
chrA1	6233688	C	G	PASS	downstream_gene_variant	MODIFIER	CDK8	CDK8	transcript	XM_003980264.6	protein_coding	-1	c.*1668C>G
chrA1	6233688	C	G	PASS	downstream_gene_variant	MODIFIER	CDK8	CDK8	transcript	XM_045044570.1	protein_coding	-1	c.*3182C>G
chrA1	6233688	C	G	PASS	downstream_gene_variant	MODIFIER	CDK8	CDK8	transcript	XM_019821740.3	protein_coding	-1	c.*1668C>G
chrA1	6233688	C	G	PASS	downstream_gene_variant	MODIFIER	CDK8	CDK8	transcript	XM_006927174.5	protein_coding	-1	c.*1668C>G
chrA1	6233688	C	G	PASS	downstream_gene_variant	MODIFIER	CDK8	CDK8	transcript	XM_019821783.2	protein_coding	-1	c.*1668C>G
chrA1	6233688	C	G	PASS	intron_variant	MODIFIER	CDK8	CDK8	transcript	XM_045044624.1	protein_coding	12	c.1269+4280C>G
chrA1	6233688	C	G	PASS	intron_variant	MODIFIER	CDK8	CDK8	transcript	XM_045044653.1	protein_coding	12	c.1269+4280C>G
chrA1	6233688	C	G	PASS	intron_variant	MODIFIER	CDK8	CDK8	transcript	XR_006589566.1	pseudogene	12	n.1963+4280C>G
chrA1	6233982	G	A	PASS	downstream_gene_variant	MODIFIER	CDK8	CDK8	transcript	XM_003980264.6	protein_coding	-1	c.*1962G>A
chrA1	6233982	G	A	PASS	downstream_gene_variant	MODIFIER	CDK8	CDK8	transcript	XM_045044570.1	protein_coding	-1	c.*3476G>A
chrA1	6233982	G	A	PASS	downstream_gene_variant	MODIFIER	CDK8	CDK8	transcript	XM_019821740.3	protein_coding	-1	c.*1962G>A
chrA1	6233982	G	A	PASS	downstream_gene_variant	MODIFIER	CDK8	CDK8	transcript	XM_006927174.5	protein_coding	-1	c.*1962G>A
chrA1	6233982	G	A	PASS	downstream_gene_variant	MODIFIER	CDK8	CDK8	transcript	XM_019821783.2	protein_coding	-1	c.*1962G>A
chrA1	6233982	G	A	PASS	intron_variant	MODIFIER	CDK8	CDK8	transcript	XM_045044624.1	protein_coding	12	c.1269+4574G>A
chrA1	6233982	G	A	PASS	intron_variant	MODIFIER	CDK8	CDK8	transcript	XM_045044653.1	protein_coding	12	c.1269+4574G>A
chrA1	6233982	G	A	PASS	intron_variant	MODIFIER	CDK8	CDK8	transcript	XR_006589566.1	pseudogene	12	n.1963+4574G>A
chrA1	6234256	C	G	PASS	downstream_gene_variant	MODIFIER	CDK8	CDK8	transcript	XM_003980264.6	protein_coding	-1	c.*2236C>G
chrA1	6234256	C	G	PASS	downstream_gene_variant	MODIFIER	CDK8	CDK8	transcript	XM_045044570.1	protein_coding	-1	c.*3750C>G
chrA1	6234256	C	G	PASS	downstream_gene_variant	MODIFIER	CDK8	CDK8	transcript	XM_019821740.3	protein_coding	-1	c.*2236C>G
chrA1	6234256	C	G	PASS	downstream_gene_variant	MODIFIER	CDK8	CDK8	transcript	XM_006927174.5	protein_coding	-1	c.*2236C>G
chrA1	6234256	C	G	PASS	downstream_gene_variant	MODIFIER	CDK8	CDK8	transcript	XM_019821783.2	protein_coding	-1	c.*2236C>G
chrA1	6234256	C	G	PASS	intron_variant	MODIFIER	CDK8	CDK8	transcript	XM_045044624.1	protein_coding	12	c.1269+4848C>G
chrA1	6234256	C	G	PASS	intron_variant	MODIFIER	CDK8	CDK8	transcript	XM_045044653.1	protein_coding	12	c.1269+4848C>G
chrA1	6234256	C	G	PASS	intron_variant	MODIFIER	CDK8	CDK8	transcript	XR_006589566.1	pseudogene	12	n.1963+4848C>G
chrA1	6244547	G	A	PASS	downstream_gene_variant	MODIFIER	CDK8	CDK8	transcript	XM_045044653.1	protein_coding	-1	c.*3699G>A
chrA1	6244547	G	A	PASS	intron_variant	MODIFIER	CDK8	CDK8	transcript	XM_045044624.1	protein_coding	12	c.1270-1899G>A
chrA1	6244547	G	A	PASS	intron_variant	MODIFIER	CDK8	CDK8	transcript	XR_006589566.1	pseudogene	13	n.2095-1899G>A
chrA1	6247168	G	A	PASS	downstream_gene_variant	MODIFIER	CDK8	CDK8	transcript	XM_045044624.1	protein_coding	-1	c.*663G>A
chrA1	6247168	G	A	PASS	downstream_gene_variant	MODIFIER	CDK8	CDK8	transcript	XR_006589566.1	pseudogene	-1	n.*401G>A
chrA1	6247168	G	A	PASS	intergenic_region	MODIFIER	CDK8-LOC123381975	CDK8-LOC123381975	intergenic_region	CDK8-LOC123381975		-1	n.6247168G>A
chrA1	6249298	C	T	PASS	downstream_gene_variant	MODIFIER	CDK8	CDK8	transcript	XM_045044624.1	protein_coding	-1	c.*2793C>T
chrA1	6249298	C	T	PASS	downstream_gene_variant	MODIFIER	CDK8	CDK8	transcript	XR_006589566.1	pseudogene	-1	n.*2531C>T
chrA1	6249298	C	T	PASS	intergenic_region	MODIFIER	CDK8-LOC123381975	CDK8-LOC123381975	intergenic_region	CDK8-LOC123381975		-1	n.6249298C>T
chrA1	6252674	G	A	PASS	intergenic_region	MODIFIER	CDK8-LOC123381975	CDK8-LOC123381975	intergenic_region	CDK8-LOC123381975		-1	n.6252674G>A
chrA1	6259480	A	G	PASS	downstream_gene_variant	MODIFIER	LOC123381975	LOC123381975	transcript	XR_006589671.1	pseudogene	-1	n.*1503T>C
chrA1	6259480	A	G	PASS	intergenic_region	MODIFIER	CDK8-LOC123381975	CDK8-LOC123381975	intergenic_region	CDK8-LOC123381975		-1	n.6259480A>G
chrA1	6263308	T	C	PASS	intron_variant	MODIFIER	LOC123381975	LOC123381975	transcript	XR_006589671.1	pseudogene	5	n.1526-605A>G
chrA1	6295145	G	T	QD2	intergenic_region	MODIFIER	LOC123381975-WASF3	LOC123381975-WASF3	intergenic_region	LOC123381975-WASF3		-1	n.6295145G>T
chrA1	6316434	C	T	PASS	intergenic_region	MODIFIER	LOC123381975-WASF3	LOC123381975-WASF3	intergenic_region	LOC123381975-WASF3		-1	n.6316434C>T
chrA1	6317357	T	C	PASS	intergenic_region	MODIFIER	LOC123381975-WASF3	LOC123381975-WASF3	intergenic_region	LOC123381975-WASF3		-1	n.6317357T>C
chrA1	6322870	C	T	PASS	intergenic_region	MODIFIER	LOC123381975-WASF3	LOC123381975-WASF3	intergenic_region	LOC123381975-WASF3		-1	n.6322870C>T
chrA1	6335225	TC	T	PASS	intergenic_region	MODIFIER	LOC123381975-WASF3	LOC123381975-WASF3	intergenic_region	LOC123381975-WASF3		-1	n.6335226delC
chrA1	6348550	T	G	PASS	upstream_gene_variant	MODIFIER	WASF3	WASF3	transcript	XM_023250199.2	protein_coding	-1	c.-1997T>G
chrA1	6348550	T	G	PASS	upstream_gene_variant	MODIFIER	WASF3	WASF3	transcript	XM_023250152.2	protein_coding	-1	c.-1997T>G
chrA1	6348550	T	G	PASS	upstream_gene_variant	MODIFIER	WASF3	WASF3	transcript	XM_023250184.2	protein_coding	-1	c.-1978T>G
chrA1	6348550	T	G	PASS	intergenic_region	MODIFIER	LOC123381975-WASF3	LOC123381975-WASF3	intergenic_region	LOC123381975-WASF3		-1	n.6348550T>G
chrA1	6351008	C	T	PASS	intron_variant	MODIFIER	WASF3	WASF3	transcript	XM_023250199.2	protein_coding	1	c.-108+569C>T
chrA1	6351008	C	T	PASS	intron_variant	MODIFIER	WASF3	WASF3	transcript	XM_023250152.2	protein_coding	1	c.-108+569C>T
chrA1	6351008	C	T	PASS	intron_variant	MODIFIER	WASF3	WASF3	transcript	XM_023250184.2	protein_coding	1	c.-89+569C>T
chrA1	6368342	G	A	PASS	upstream_gene_variant	MODIFIER	WASF3	WASF3	transcript	XM_019822289.3	protein_coding	-1	c.-184G>A
chrA1	6368342	G	A	PASS	intron_variant	MODIFIER	WASF3	WASF3	transcript	XM_023250199.2	protein_coding	1	c.-108+17903G>A
chrA1	6368342	G	A	PASS	intron_variant	MODIFIER	WASF3	WASF3	transcript	XM_023250152.2	protein_coding	1	c.-108+17903G>A
chrA1	6368342	G	A	PASS	intron_variant	MODIFIER	WASF3	WASF3	transcript	XM_023250184.2	protein_coding	1	c.-89+17903G>A
chrA1	6376849	G	A	PASS	intron_variant	MODIFIER	WASF3	WASF3	transcript	XM_023250199.2	protein_coding	1	c.-108+26410G>A
chrA1	6376849	G	A	PASS	intron_variant	MODIFIER	WASF3	WASF3	transcript	XM_023250152.2	protein_coding	1	c.-108+26410G>A
chrA1	6376849	G	A	PASS	intron_variant	MODIFIER	WASF3	WASF3	transcript	XM_023250184.2	protein_coding	1	c.-89+26410G>A
chrA1	6376849	G	A	PASS	intron_variant	MODIFIER	WASF3	WASF3	transcript	XM_019822289.3	protein_coding	1	c.-108+8431G>A
chrA1	6379795	C	T	PASS	downstream_gene_variant	MODIFIER	LOC111556724	LOC111556724	transcript	XR_002736440.2	snRNA	-1	n.*3852G>A
chrA1	6379795	C	T	PASS	intron_variant	MODIFIER	WASF3	WASF3	transcript	XM_023250199.2	protein_coding	1	c.-108+29356C>T
chrA1	6379795	C	T	PASS	intron_variant	MODIFIER	WASF3	WASF3	transcript	XM_023250152.2	protein_coding	1	c.-108+29356C>T
chrA1	6379795	C	T	PASS	intron_variant	MODIFIER	WASF3	WASF3	transcript	XM_023250184.2	protein_coding	1	c.-89+29356C>T
chrA1	6379795	C	T	PASS	intron_variant	MODIFIER	WASF3	WASF3	transcript	XM_019822289.3	protein_coding	1	c.-108+11377C>T
chrA1	6425424	C	T	PASS	intron_variant	MODIFIER	WASF3	WASF3	transcript	XM_006927176.5	protein_coding	2	c.-11+13780C>T
chrA1	6425424	C	T	PASS	intron_variant	MODIFIER	WASF3	WASF3	transcript	XM_023250199.2	protein_coding	2	c.-11+13780C>T
chrA1	6425424	C	T	PASS	intron_variant	MODIFIER	WASF3	WASF3	transcript	XM_023250152.2	protein_coding	2	c.-11+13780C>T
chrA1	6425424	C	T	PASS	intron_variant	MODIFIER	WASF3	WASF3	transcript	XM_023250184.2	protein_coding	2	c.-11+13799C>T
chrA1	6425424	C	T	PASS	intron_variant	MODIFIER	WASF3	WASF3	transcript	XM_019822289.3	protein_coding	2	c.-11+13780C>T
chrA1	6425424	C	T	PASS	intron_variant	MODIFIER	WASF3	WASF3	transcript	XM_019822445.3	protein_coding	2	c.-11+13799C>T
chrA1	6425424	C	T	PASS	intron_variant	MODIFIER	WASF3	WASF3	transcript	XM_019822250.3	protein_coding	2	c.-11+13780C>T
chrA1	6425424	C	T	PASS	intron_variant	MODIFIER	WASF3	WASF3	transcript	XM_019822353.3	protein_coding	3	c.-11+13799C>T
chrA1	6425424	C	T	PASS	intron_variant	MODIFIER	WASF3	WASF3	transcript	XM_019822405.3	protein_coding	2	c.-11+13799C>T
chrA1	6425424	C	T	PASS	intron_variant	MODIFIER	WASF3	WASF3	transcript	XM_019822210.3	protein_coding	3	c.-11+13780C>T
chrA1	6425424	C	T	PASS	intron_variant	MODIFIER	WASF3	WASF3	transcript	XM_019822322.3	protein_coding	2	c.-11+13780C>T
chrA1	6425814	ATTTTATTTTATTTTATTTTATT	A	PASS	intron_variant	MODIFIER	WASF3	WASF3	transcript	XM_006927176.5	protein_coding	2	c.-10-14168_-10-14147delTTTTATTTTATTTTATTTTATT
chrA1	6425814	ATTTTATTTTATTTTATTTTATT	A	PASS	intron_variant	MODIFIER	WASF3	WASF3	transcript	XM_023250199.2	protein_coding	2	c.-10-14168_-10-14147delTTTTATTTTATTTTATTTTATT
chrA1	6425814	ATTTTATTTTATTTTATTTTATT	A	PASS	intron_variant	MODIFIER	WASF3	WASF3	transcript	XM_023250152.2	protein_coding	2	c.-10-14168_-10-14147delTTTTATTTTATTTTATTTTATT
chrA1	6425814	ATTTTATTTTATTTTATTTTATT	A	PASS	intron_variant	MODIFIER	WASF3	WASF3	transcript	XM_023250184.2	protein_coding	2	c.-10-14168_-10-14147delTTTTATTTTATTTTATTTTATT
chrA1	6425814	ATTTTATTTTATTTTATTTTATT	A	PASS	intron_variant	MODIFIER	WASF3	WASF3	transcript	XM_019822289.3	protein_coding	2	c.-10-14168_-10-14147delTTTTATTTTATTTTATTTTATT
chrA1	6425814	ATTTTATTTTATTTTATTTTATT	A	PASS	intron_variant	MODIFIER	WASF3	WASF3	transcript	XM_019822445.3	protein_coding	2	c.-10-14168_-10-14147delTTTTATTTTATTTTATTTTATT
chrA1	6425814	ATTTTATTTTATTTTATTTTATT	A	PASS	intron_variant	MODIFIER	WASF3	WASF3	transcript	XM_019822250.3	protein_coding	2	c.-10-14168_-10-14147delTTTTATTTTATTTTATTTTATT
chrA1	6425814	ATTTTATTTTATTTTATTTTATT	A	PASS	intron_variant	MODIFIER	WASF3	WASF3	transcript	XM_019822353.3	protein_coding	3	c.-10-14168_-10-14147delTTTTATTTTATTTTATTTTATT
chrA1	6425814	ATTTTATTTTATTTTATTTTATT	A	PASS	intron_variant	MODIFIER	WASF3	WASF3	transcript	XM_019822405.3	protein_coding	2	c.-10-14168_-10-14147delTTTTATTTTATTTTATTTTATT
chrA1	6425814	ATTTTATTTTATTTTATTTTATT	A	PASS	intron_variant	MODIFIER	WASF3	WASF3	transcript	XM_019822210.3	protein_coding	3	c.-10-14168_-10-14147delTTTTATTTTATTTTATTTTATT
chrA1	6425814	ATTTTATTTTATTTTATTTTATT	A	PASS	intron_variant	MODIFIER	WASF3	WASF3	transcript	XM_019822322.3	protein_coding	2	c.-10-14168_-10-14147delTTTTATTTTATTTTATTTTATT
chrA1	6451270	G	A	PASS	intron_variant	MODIFIER	WASF3	WASF3	transcript	XM_006927176.5	protein_coding	3	c.133+11145G>A
chrA1	6451270	G	A	PASS	intron_variant	MODIFIER	WASF3	WASF3	transcript	XM_023250199.2	protein_coding	3	c.133+11145G>A
chrA1	6451270	G	A	PASS	intron_variant	MODIFIER	WASF3	WASF3	transcript	XM_023250152.2	protein_coding	3	c.133+11145G>A
chrA1	6451270	G	A	PASS	intron_variant	MODIFIER	WASF3	WASF3	transcript	XM_023250184.2	protein_coding	3	c.133+11145G>A
chrA1	6451270	G	A	PASS	intron_variant	MODIFIER	WASF3	WASF3	transcript	XM_019822289.3	protein_coding	3	c.133+11145G>A
chrA1	6451270	G	A	PASS	intron_variant	MODIFIER	WASF3	WASF3	transcript	XM_019822445.3	protein_coding	3	c.133+11145G>A
chrA1	6451270	G	A	PASS	intron_variant	MODIFIER	WASF3	WASF3	transcript	XM_019822250.3	protein_coding	3	c.133+11145G>A
chrA1	6451270	G	A	PASS	intron_variant	MODIFIER	WASF3	WASF3	transcript	XM_019822353.3	protein_coding	4	c.133+11145G>A
chrA1	6451270	G	A	PASS	intron_variant	MODIFIER	WASF3	WASF3	transcript	XM_019822405.3	protein_coding	3	c.133+11145G>A
chrA1	6451270	G	A	PASS	intron_variant	MODIFIER	WASF3	WASF3	transcript	XM_019822210.3	protein_coding	4	c.133+11145G>A
chrA1	6451270	G	A	PASS	intron_variant	MODIFIER	WASF3	WASF3	transcript	XM_019822322.3	protein_coding	3	c.133+11145G>A
chrA1	6451270	G	A	PASS	intron_variant	MODIFIER	WASF3	WASF3	transcript	XM_045045096.1	protein_coding	2	c.133+11145G>A
chrA1	6451270	G	A	PASS	intron_variant	MODIFIER	WASF3	WASF3	transcript	XM_045045140.1	protein_coding	2	c.19+540G>A
chrA1	6451388	CTCTCTCTCTCTCT	C	PASS	intron_variant	MODIFIER	WASF3	WASF3	transcript	XM_006927176.5	protein_coding	3	c.133+11264_133+11276delTCTCTCTCTCTCT
chrA1	6451388	CTCTCTCTCTCTCT	C	PASS	intron_variant	MODIFIER	WASF3	WASF3	transcript	XM_023250199.2	protein_coding	3	c.133+11264_133+11276delTCTCTCTCTCTCT
chrA1	6451388	CTCTCTCTCTCTCT	C	PASS	intron_variant	MODIFIER	WASF3	WASF3	transcript	XM_023250152.2	protein_coding	3	c.133+11264_133+11276delTCTCTCTCTCTCT
chrA1	6451388	CTCTCTCTCTCTCT	C	PASS	intron_variant	MODIFIER	WASF3	WASF3	transcript	XM_023250184.2	protein_coding	3	c.133+11264_133+11276delTCTCTCTCTCTCT
chrA1	6451388	CTCTCTCTCTCTCT	C	PASS	intron_variant	MODIFIER	WASF3	WASF3	transcript	XM_019822289.3	protein_coding	3	c.133+11264_133+11276delTCTCTCTCTCTCT
chrA1	6451388	CTCTCTCTCTCTCT	C	PASS	intron_variant	MODIFIER	WASF3	WASF3	transcript	XM_019822445.3	protein_coding	3	c.133+11264_133+11276delTCTCTCTCTCTCT
chrA1	6451388	CTCTCTCTCTCTCT	C	PASS	intron_variant	MODIFIER	WASF3	WASF3	transcript	XM_019822250.3	protein_coding	3	c.133+11264_133+11276delTCTCTCTCTCTCT
chrA1	6451388	CTCTCTCTCTCTCT	C	PASS	intron_variant	MODIFIER	WASF3	WASF3	transcript	XM_019822353.3	protein_coding	4	c.133+11264_133+11276delTCTCTCTCTCTCT
chrA1	6451388	CTCTCTCTCTCTCT	C	PASS	intron_variant	MODIFIER	WASF3	WASF3	transcript	XM_019822405.3	protein_coding	3	c.133+11264_133+11276delTCTCTCTCTCTCT
chrA1	6451388	CTCTCTCTCTCTCT	C	PASS	intron_variant	MODIFIER	WASF3	WASF3	transcript	XM_019822210.3	protein_coding	4	c.133+11264_133+11276delTCTCTCTCTCTCT
chrA1	6451388	CTCTCTCTCTCTCT	C	PASS	intron_variant	MODIFIER	WASF3	WASF3	transcript	XM_019822322.3	protein_coding	3	c.133+11264_133+11276delTCTCTCTCTCTCT
chrA1	6451388	CTCTCTCTCTCTCT	C	PASS	intron_variant	MODIFIER	WASF3	WASF3	transcript	XM_045045096.1	protein_coding	2	c.133+11264_133+11276delTCTCTCTCTCTCT
chrA1	6451388	CTCTCTCTCTCTCT	C	PASS	intron_variant	MODIFIER	WASF3	WASF3	transcript	XM_045045140.1	protein_coding	2	c.19+659_19+671delTCTCTCTCTCTCT
chrA1	6549886	T	C	PASS	upstream_gene_variant	MODIFIER	GPR12	GPR12	transcript	XM_023250214.2	protein_coding	-1	c.-4923A>G
chrA1	6549886	T	C	PASS	intergenic_region	MODIFIER	GPR12-LOC101097035	GPR12-LOC101097035	intergenic_region	GPR12-LOC101097035		-1	n.6549886T>C
chrA1	6567827	G	A	PASS	intergenic_region	MODIFIER	GPR12-LOC101097035	GPR12-LOC101097035	intergenic_region	GPR12-LOC101097035		-1	n.6567827G>A
chrA1	6586566	C	T	PASS	intergenic_region	MODIFIER	GPR12-LOC101097035	GPR12-LOC101097035	intergenic_region	GPR12-LOC101097035		-1	n.6586566C>T
chrA1	6591305	C	G	PASS	intergenic_region	MODIFIER	GPR12-LOC101097035	GPR12-LOC101097035	intergenic_region	GPR12-LOC101097035		-1	n.6591305C>G
chrA1	6607774	ACT	A	PASS	intergenic_region	MODIFIER	GPR12-LOC101097035	GPR12-LOC101097035	intergenic_region	GPR12-LOC101097035		-1	n.6607775_6607776delCT
chrA1	6614104	A	G	PASS	intergenic_region	MODIFIER	GPR12-LOC101097035	GPR12-LOC101097035	intergenic_region	GPR12-LOC101097035		-1	n.6614104A>G
chrA1	6617471	C	A	PASS	intergenic_region	MODIFIER	GPR12-LOC101097035	GPR12-LOC101097035	intergenic_region	GPR12-LOC101097035		-1	n.6617471C>A
chrA1	6617487	T	G	PASS	intergenic_region	MODIFIER	GPR12-LOC101097035	GPR12-LOC101097035	intergenic_region	GPR12-LOC101097035		-1	n.6617487T>G
chrA1	6635439	T	C	PASS	intergenic_region	MODIFIER	GPR12-LOC101097035	GPR12-LOC101097035	intergenic_region	GPR12-LOC101097035		-1	n.6635439T>C
chrA1	6696621	G	A	PASS	intergenic_region	MODIFIER	LOC101097035-LOC123382102	LOC101097035-LOC123382102	intergenic_region	LOC101097035-LOC123382102		-1	n.6696621G>A
chrA1	6700817	T	G	PASS	intergenic_region	MODIFIER	LOC101097035-LOC123382102	LOC101097035-LOC123382102	intergenic_region	LOC101097035-LOC123382102		-1	n.6700817T>G
chrA1	6763483	G	A	PASS	intron_variant	MODIFIER	LOC123382099	LOC123382099	transcript	XR_006589951.1	pseudogene	2	n.281-1156C>T
chrA1	6772771	G	A	PASS	intron_variant	MODIFIER	LOC123382099	LOC123382099	transcript	XR_006589951.1	pseudogene	2	n.280+659C>T
chrA1	6775515	C	T	PASS	upstream_gene_variant	MODIFIER	LOC123382099	LOC123382099	transcript	XR_006589951.1	pseudogene	-1	n.-899G>A
chrA1	6775515	C	T	PASS	intergenic_region	MODIFIER	LOC123382099-USP12	LOC123382099-USP12	intergenic_region	LOC123382099-USP12		-1	n.6775515C>T
chrA1	6776272	C	T	PASS	upstream_gene_variant	MODIFIER	LOC123382099	LOC123382099	transcript	XR_006589951.1	pseudogene	-1	n.-1656G>A
chrA1	6776272	C	T	PASS	intergenic_region	MODIFIER	LOC123382099-USP12	LOC123382099-USP12	intergenic_region	LOC123382099-USP12		-1	n.6776272C>T
chrA1	6783116	C	G	PASS	intergenic_region	MODIFIER	LOC123382099-USP12	LOC123382099-USP12	intergenic_region	LOC123382099-USP12		-1	n.6783116C>G
chrA1	6784083	T	C	PASS	intergenic_region	MODIFIER	LOC123382099-USP12	LOC123382099-USP12	intergenic_region	LOC123382099-USP12		-1	n.6784083T>C
chrA1	6788712	C	T	PASS	intergenic_region	MODIFIER	LOC123382099-USP12	LOC123382099-USP12	intergenic_region	LOC123382099-USP12		-1	n.6788712C>T
chrA1	6792651	CT	C	PASS	intergenic_region	MODIFIER	LOC123382099-USP12	LOC123382099-USP12	intergenic_region	LOC123382099-USP12		-1	n.6792652delT
chrA1	6795093	C	T	PASS	intergenic_region	MODIFIER	LOC123382099-USP12	LOC123382099-USP12	intergenic_region	LOC123382099-USP12		-1	n.6795093C>T
chrA1	6831886	C	T	PASS	intron_variant	MODIFIER	USP12	USP12	transcript	XM_023250229.2	protein_coding	4	c.574-581G>A
chrA1	6831886	C	T	PASS	intron_variant	MODIFIER	USP12	USP12	transcript	XM_045045350.1	protein_coding	2	c.214-581G>A
chrA1	6831886	C	T	PASS	intron_variant	MODIFIER	USP12	USP12	transcript	XM_045045340.1	protein_coding	4	c.574-581G>A
chrA1	6832025	C	T	PASS	intron_variant	MODIFIER	USP12	USP12	transcript	XM_023250229.2	protein_coding	4	c.574-720G>A
chrA1	6832025	C	T	PASS	intron_variant	MODIFIER	USP12	USP12	transcript	XM_045045350.1	protein_coding	2	c.214-720G>A
chrA1	6832025	C	T	PASS	intron_variant	MODIFIER	USP12	USP12	transcript	XM_045045340.1	protein_coding	4	c.574-720G>A
chrA1	6838451	C	T	PASS	intron_variant	MODIFIER	USP12	USP12	transcript	XM_023250229.2	protein_coding	3	c.344-1154G>A
chrA1	6838451	C	T	PASS	intron_variant	MODIFIER	USP12	USP12	transcript	XM_045045350.1	protein_coding	1	c.-17-1154G>A
chrA1	6838451	C	T	PASS	intron_variant	MODIFIER	USP12	USP12	transcript	XM_045045340.1	protein_coding	3	c.344-1154G>A
chrA1	6838517	TTTATTTA	T	PASS	intron_variant	MODIFIER	USP12	USP12	transcript	XM_023250229.2	protein_coding	3	c.344-1227_344-1221delTAAATAA
chrA1	6838517	TTTATTTA	T	PASS	intron_variant	MODIFIER	USP12	USP12	transcript	XM_045045350.1	protein_coding	1	c.-17-1227_-17-1221delTAAATAA
chrA1	6838517	TTTATTTA	T	PASS	intron_variant	MODIFIER	USP12	USP12	transcript	XM_045045340.1	protein_coding	3	c.344-1227_344-1221delTAAATAA
chrA1	6864035	G	A	PASS	upstream_gene_variant	MODIFIER	USP12	USP12	transcript	XM_045045350.1	protein_coding	-1	c.-3841C>T
chrA1	6864035	G	A	PASS	intron_variant	MODIFIER	USP12	USP12	transcript	XM_023250229.2	protein_coding	1	c.49-3743C>T
chrA1	6864035	G	A	PASS	intron_variant	MODIFIER	USP12	USP12	transcript	XM_045045340.1	protein_coding	1	c.49-3743C>T
chrA1	6880190	G	A	PASS	intron_variant	MODIFIER	USP12	USP12	transcript	XM_023250229.2	protein_coding	1	c.49-19898C>T
chrA1	6880190	G	A	PASS	intron_variant	MODIFIER	USP12	USP12	transcript	XM_045045340.1	protein_coding	1	c.49-19898C>T
chrA1	6895746	G	A	PASS	intron_variant	MODIFIER	USP12	USP12	transcript	XM_023250229.2	protein_coding	1	c.48+21043C>T
chrA1	6895746	G	A	PASS	intron_variant	MODIFIER	USP12	USP12	transcript	XM_045045340.1	protein_coding	1	c.48+21043C>T
chrA1	6896254	T	C	PASS	intron_variant	MODIFIER	USP12	USP12	transcript	XM_023250229.2	protein_coding	1	c.48+20535A>G
chrA1	6896254	T	C	PASS	intron_variant	MODIFIER	USP12	USP12	transcript	XM_045045340.1	protein_coding	1	c.48+20535A>G
chrA1	6900341	AAAAG	A	PASS	intron_variant	MODIFIER	USP12	USP12	transcript	XM_023250229.2	protein_coding	1	c.48+16444_48+16447delCTTT
chrA1	6900341	AAAAG	A	PASS	intron_variant	MODIFIER	USP12	USP12	transcript	XM_045045340.1	protein_coding	1	c.48+16444_48+16447delCTTT
chrA1	6912645	C	T	PASS	upstream_gene_variant	MODIFIER	LOC109496069	LOC109496069	transcript	XR_002151889.3	pseudogene	-1	n.-4788C>T
chrA1	6912645	C	T	PASS	intron_variant	MODIFIER	USP12	USP12	transcript	XM_023250229.2	protein_coding	1	c.48+4144G>A
chrA1	6912645	C	T	PASS	intron_variant	MODIFIER	USP12	USP12	transcript	XM_045045340.1	protein_coding	1	c.48+4144G>A
chrA1	6917024	T	TCCCCCCCCCCCCCCC	PASS	5_prime_UTR_variant	MODIFIER	USP12	USP12	transcript	XM_023250229.2	protein_coding	1	c.-189_-188insGGGGGGGGGGGGGGG
chrA1	6917024	T	TCCCCCCCCCCCCCCC	PASS	5_prime_UTR_variant	MODIFIER	USP12	USP12	transcript	XM_045045340.1	protein_coding	1	c.-189_-188insGGGGGGGGGGGGGGG
chrA1	6917024	T	TCCCCCCCCCCCCCCC	PASS	upstream_gene_variant	MODIFIER	LOC109496069	LOC109496069	transcript	XR_002151889.3	pseudogene	-1	n.-409_-408insCCCCCCCCCCCCCCC
[truncated: 355,454+ more rows]
